# Supplementary material
Source: publisher figshare collection journal article supplement (https://gsajournals.figshare.com/ndownloader/files/13238864)
Supplement: Supplementary file 1 [file 13238864]

## Sheet: lima bean
Table S1 - Differential gene expression analysis of the different T. urticae host plant populations. Differentially expressed genes (absolute log2FC ≥ 0.585 and Benjamini-Hochberg adjusted p-value < 0.05) between adult T. urticae females of the lima bean (Phaseolus lunatus) population compared to adult T. urticae females of the parental population on common bean (Phaseolus vulgaris)
T.urticae gene ID*	description	log2 FC	AveExpr	t	P.Value	adj.P.Val	B
tetur31g01860	Hypothetical protein	5.53531	8.68694	13.3683	4.04539e-10	6.26766e-07	13.2923
tetur31g00690	Cysteine peptidase, asparagine active site	4.00942	10.2534	7.47265	1.29865e-06	0.000174118	5.65435
tetur14g02720	Hypothetical protein	3.86814	11.1849	9.63872	4.42749e-08	1.92928e-05	8.93109
tetur01g13310	Small Secreted Protein; family A	3.77217	10.6889	4.80788	0.000191326	0.00386646	0.720126
tetur31g00810	Hypothetical protein	3.55644	8.87595	7.64666	9.68885e-07	0.00014527	5.94149
tetur03g06290	Hypothetical protein	3.49873	7.69813	15.7143	3.59202e-11	1.00174e-07	15.4105
tetur31g00700	Cathepsin L	3.31773	10.4989	9.28514	7.40104e-08	3.12727e-05	8.43856
tetur31g01890	Hypothetical protein	3.10587	9.80291	7.478	1.28693e-06	0.000174118	5.66325
tetur03g02880	PREDICTED: similar to adenylate cyclase	2.57208	7.59604	9.67428	4.20768e-08	1.89264e-05	8.97977
tetur26g02760	Hypothetical protein	2.54528	11.4805	10.6391	1.11111e-08	7.37777e-06	10.2434
tetur31g00680	Apolipoprotein D precursor	2.53033	12.8063	8.64619	1.94129e-07	6.29521e-05	7.50798
tetur11g05100	adenylate cyclase	2.42708	9.52334	10.1547	2.14256e-08	1.19503e-05	9.62258
tetur05g01720	conserved secreted protein 1	2.42661	9.18875	8.37595	2.96159e-07	7.79177e-05	7.09809
tetur04g09489	Small Secreted Protein; Family F	2.32839	9.97355	4.91086	0.000155126	0.00340326	0.927688
tetur08g06370	sialin	2.26453	7.97167	9.15421	8.98357e-08	3.38559e-05	8.25218
tetur07g06410	Cytochrome P450 - CYP392A1	2.20983	9.00597	6.68524	5.14204e-06	0.000406508	4.30005
tetur14g03430	Hypothetical protein	2.20587	9.88616	7.38854	1.4983e-06	0.000191673	5.51401
tetur04g06010	Apolipoprotein D precursor	2.19682	11.0974	5.51787	4.61907e-05	0.001547	2.12777
tetur20g00010	Hypothetical protein	2.18184	14.081	6.38191	8.93602e-06	0.000539411	3.75417
tetur08g06340	sialin	2.17868	8.60598	10.1016	2.30589e-08	1.23667e-05	9.55283
tetur31g01330	Glutathione S-transferase; class delta	2.13826	10.9275	7.26814	1.84174e-06	0.000221866	5.3113
tetur16g02250	Low-density lipoprotein (LDL) receptor class A repeat	2.04646	8.65223	8.29779	3.35197e-07	8.28071e-05	6.97769
tetur31g00830	methyl-accepting chemotaxis sensory transducer	2.02266	7.36903	4.51092	0.000352433	0.00570769	0.116313
tetur01g13320	Small Secreted Protein; family A	2.02033	13.1399	3.45955	0.00321338	0.0246968	-2.05078
tetur01g10810	Carboxyl/cholinesterase	1.99084	10.4208	6.93591	3.28794e-06	0.000307698	4.74102
tetur06g02780	Hypothetical protein	1.96979	9.08654	6.54735	6.60023e-06	0.000463444	4.05357
tetur03g02680	PREDICTED: similar to adenylate cyclase	1.9547	8.10586	7.89399	6.43296e-07	0.000118028	6.34212
tetur08g07920	Hypothetical protein	1.8964	10.5811	5.7583	2.89523e-05	0.00116027	2.59062
tetur60g00020	Legumain;	1.85775	13.2427	7.20486	2.05431e-06	0.000227741	5.20393
tetur614g00010	Hypothetical protein	1.82333	10.4683	5.49066	4.87204e-05	0.00160605	2.07494
tetur11g05010	Hypothetical protein	1.82096	7.6008	5.88525	2.26936e-05	0.000995091	2.83189
tetur03g08030	Cathepsin B	1.81051	12.2111	11.7999	2.51822e-09	2.39674e-06	11.6281
tetur15g01980	conserved secreted protein 1	1.80288	13.2284	5.45833	5.19147e-05	0.00167074	2.01201
tetur08g06410	sialin	1.78308	10.8249	8.68695	1.82287e-07	6.05194e-05	7.56894
tetur31g01900	Protein of unknown function DUF388; OB-fold	1.76339	11.7873	6.56052	6.44403e-06	0.000460798	4.07722
tetur08g02650	Hypothetical protein	1.76087	9.38366	4.41006	0.000434487	0.00654264	-0.0902598
tetur16g03330	Serine protease homologue	1.76003	9.51214	7.13755	2.30879e-06	0.000247068	5.08908
tetur02g14120	antigen B membrane protein	1.72052	10.0343	12.8994	6.85317e-10	9.55605e-07	12.8178
tetur01g06610	Legumain	1.69215	13.596	6.0273	1.7324e-05	0.000841695	3.09923
tetur16g03200	PREDICTED: similar to adenylate cyclase	1.66944	8.16212	9.8763	3.15884e-08	1.5731e-05	9.2534
tetur02g13890	Hypothetical protein	1.60137	11.5854	7.48105	1.2803e-06	0.000174118	5.66831
tetur16g03740	Wannes-Thomas Secreted Protein 12	1.5938	9.23628	4.50724	0.000355125	0.00572972	0.108799
tetur46g00150	Cytochrome P450 - CYP385C4v2	1.57166	10.0115	8.03728	5.09244e-07	0.000103713	6.57026
tetur02g07570	Lecithin:cholesterol/phospholipid:diacylglycerol acyltransferase	1.55564	7.29364	7.62832	9.99077e-07	0.000147219	5.91143
tetur06g03000	Hypothetical protein	1.54591	12.3517	5.28711	7.2825e-05	0.00206817	1.67663
tetur06g02130	Apolipoprotein D	1.54304	11.9511	6.1327	1.42044e-05	0.000733576	3.29576
tetur04g02320	PREDICTED: similar to sodium-dependent phosphate transporter	1.52606	9.79492	7.81945	7.27194e-07	0.000124404	6.2223
tetur09g04720	Apolipoprotein D precursor	1.45963	10.4499	6.54915	6.57868e-06	0.000463444	4.0568
tetur43g00560	Hypothetical protein	1.44061	9.45902	4.83129	0.000182402	0.00376802	0.767389
tetur10g04150	lipoprotein	1.43578	9.33781	7.72174	8.54895e-07	0.000132452	6.06404
tetur09g04730	Apolipoprotein D precursor	1.4308	9.50121	5.18209	8.97883e-05	0.00236712	1.46917
tetur11g05520	Cytochrome P450 - CYP385C4	1.41941	10.2346	8.09993	4.60159e-07	9.87146e-05	6.66911
tetur06g03350	Apolipoprotein D	1.38816	10.4897	3.13318	0.00639551	0.0393379	-2.71556
tetur04g06000	Apolipoprotein D precursor	1.38794	15.7463	4.46645	0.000386462	0.00602103	0.025321
tetur11g01710	Carboxyl/cholinesterase; incomplete	1.37588	14.3465	4.45203	0.000398202	0.00612043	-0.00421615
tetur06g02590	Serine protease homologue	1.37068	10.0914	4.81519	0.000188494	0.00384869	0.73488
tetur01g16473	Peptidase C1A, papain C-terminal	1.36818	7.75306	3.41184	0.00355445	0.0263494	-2.14862
tetur28g01130	short chain dehydrogenase	1.35914	10.6248	3.73821	0.00178207	0.016477	-1.47661
tetur02g14360	Legumain	1.35173	12.1574	6.61037	5.8866e-06	0.000438945	4.16656
tetur10g01570	cysteine synthase A	1.33368	12.3941	16.0484	2.61174e-11	9.10454e-08	15.6809
tetur14g02600	Hypothetical protein	1.3071	8.65234	7.03544	2.75956e-06	0.000277562	4.91356
tetur28g01720	short-chain dehydrogenase/reductase SDR	1.30439	10.5286	6.75786	4.51318e-06	0.000387467	4.42876
tetur08g06030	Legumain	1.30427	13.2079	8.98151	1.16346e-07	4.26928e-05	8.00297
tetur01g13280	Small Secreted Protein; family A	1.29997	15.3277	10.5073	1.32551e-08	8.40132e-06	10.0771
tetur06g00950	cysteine and glycine-rich protein 3	1.29507	12.3476	8.54381	2.2758e-07	7.05195e-05	7.35385
tetur08g06330	sialin	1.29235	10.7669	4.51893	0.000346633	0.00565978	0.132697
tetur05g04700	Legumain	1.27666	15.7588	6.79984	4.18681e-06	0.000373755	4.50279
tetur31g00720	3-Pan module Cell Surface Protein; antigen-2	1.27039	9.75699	8.83655	1.44933e-07	4.92914e-05	7.7908
tetur05g05210	Glutathione S-transferase; class mu	1.26126	9.99702	6.91664	3.4019e-06	0.00031624	4.70745
tetur12g01820	Cathepsin L	1.25738	15.745	9.99782	2.66391e-08	1.37576e-05	9.41565
tetur20g01400	Hypothetical protein	1.25667	12.9011	5.95157	1.99992e-05	0.000929819	2.95705
tetur16g03310	3-Pan modules Cell Surface Protein; antigen-2	1.23617	9.53852	6.6845	5.14886e-06	0.000406508	4.29874
tetur03g03130	Hypothetical protein	1.23066	9.67425	3.19115	0.00566177	0.0360987	-2.59837
tetur22g02200	Lipase/lipooxygenase; PLAT/LH2	1.21235	14.504	8.35758	3.04884e-07	7.87278e-05	7.06987
tetur08g05010	Cathepsin B	1.20799	14.6977	11.7758	2.59382e-09	2.39674e-06	11.6008
tetur09g00500	Domain of unknown function DUF3421	1.19421	6.98267	9.26478	7.62646e-08	3.12775e-05	8.40972
tetur05g09325	UDP-glucuronosyl/UDP-glucosyltransferase	1.19291	9.25496	2.9671	0.0090541	0.0498226	-3.04842
tetur01g06730	Serine protease	1.18831	7.36344	4.34557	0.000496926	0.00705615	-0.222679
tetur07g00630	putative BigA-like protein	1.18534	12.1687	8.50356	2.42344e-07	7.12275e-05	7.29286
tetur03g07930	Cathepsin B	1.17772	14.6528	8.15701	4.19751e-07	9.44034e-05	6.75869
tetur08g00230	Hypothetical protein	1.17471	12.0751	7.22682	1.97778e-06	0.000224213	5.24126
tetur01g02650	Immunoglobulin E-set	1.16857	16.7475	3.56642	0.00256315	0.0211859	-1.83104
tetur16g02370	Hypothetical protein	1.16362	7.16522	4.20083	0.000672467	0.00850126	-0.520673
tetur09g03740	Wannes-Thomas type-I single-pass transmembrane protein	1.15796	12.503	6.97458	3.07106e-06	0.000297117	4.80824
tetur43g00580	Hypothetical protein	1.15135	13.4903	4.05878	0.000906107	0.010565	-0.813904
tetur22g02180	Lipase/lipooxygenase; PLAT/LH2	1.14442	8.78172	6.49527	7.25774e-06	0.00048919	3.95976
tetur17g00790	Glycoside hydrolase; subgroup; catalytic core	1.14413	10.5674	7.02102	2.83024e-06	0.000279893	4.88866
tetur31g01850	Hypothetical protein	1.13894	12.4722	4.53353	0.000336313	0.00555368	0.162542
tetur03g04470	Fibronectin; type III-like fold	1.13289	11.5292	8.45205	2.62712e-07	7.36382e-05	7.21452
tetur04g01670	UNC93-like protein MFSD11	1.12922	10.6584	4.79891	0.000194866	0.00391459	0.701989
tetur20g01360	Hypothetical protein	1.12617	14.6175	7.66132	9.45445e-07	0.000143297	5.96547
tetur18g00900	Lipocalin family conserved site	1.11044	11.7049	5.26087	7.67273e-05	0.00212482	1.62491
tetur01g11260	PREDICTED: similar to lycopene cyclase / phytoene synthase	1.10732	9.59816	4.6995	0.000238876	0.00441441	0.500594
tetur17g03550	MD-2-related lipid-recognition	1.09308	16.4704	4.67023	0.000253679	0.00456425	0.441153
tetur01g01520	Apolipoprotein D precursor; putative	1.09238	11.0126	4.08598	0.000855739	0.0101122	-0.757709
tetur01g08670	PREDICTED: similar to inorganic phosphate cotransporter; putative	1.09214	8.677	5.75177	2.93192e-05	0.00116475	2.57815
tetur08g06400	vesicular glutamate transporter 1	1.08658	7.76756	11.8483	2.37321e-09	2.39674e-06	11.6829
tetur05g05290	Glutathione S-transferase; class mu	1.08471	9.36658	6.54511	6.62725e-06	0.000463444	4.04953
tetur03g07920	Glutathione S-transferase; delta class	1.07537	14.8631	7.7013	8.84468e-07	0.000135528	6.03075
tetur09g00520	Domain of unknown function DUF3421	1.07508	10.4341	5.78337	2.75882e-05	0.00112482	2.63843
tetur12g04631	Cysteine peptidase, histidine active site	1.07159	14.669	11.1168	5.9443e-09	4.60485e-06	10.8302
tetur12g01810	Cathepsin L	1.06719	9.96552	9.75428	3.75414e-08	1.74492e-05	9.08872
tetur20g01390	Hypothetical protein	1.06539	12.3708	4.55536	0.000321471	0.00538773	0.20712
tetur04g07690	Domain of unknown function DUF3421	1.06139	15.8404	7.48296	1.27616e-06	0.000174118	5.67149
tetur447g00010	Hypothetical protein	1.05898	9.09561	5.20274	8.61584e-05	0.00229712	1.51005
tetur02g09990	P-loop containing nucleoside triphosphate hydrolase	1.04026	11.1637	8.49609	2.45189e-07	7.12275e-05	7.28154
tetur03g03670	Hypothetical protein	1.03296	15.5515	4.42598	0.00042035	0.00637797	-0.0576257
tetur20g00030	Hypothetical protein	1.02637	10.3482	4.21676	0.000650397	0.00832794	-0.487824
tetur23g00860	Cathepsin L	1.02347	10.7007	4.27001	0.000581833	0.00779354	-0.378125
tetur06g03040	Cathepsin L	1.01013	13.5009	5.18276	8.96685e-05	0.00236712	1.47049
tetur47g00140	Hypothetical protein	1.00453	9.30795	6.74703	4.60168e-06	0.000391255	4.4096
tetur03g04330	PREDICTED: similar to F55A4.8a	1.00207	10.0821	5.87815	2.30037e-05	0.00100553	2.81844
tetur06g04880	short-chain dehydrogenase/reductase SDR	0.999328	8.42008	7.37689	1.5284e-06	0.000193746	5.49448
tetur44g00140	intradiol ring-cleavage dioxygenase	0.989353	10.4359	7.7266	8.48022e-07	0.000132452	6.07194
tetur09g01950	ABC-transporter; class G	0.986284	11.7898	8.61379	2.0412e-07	6.46874e-05	7.45935
tetur11g01500	Carboxyl/cholinesterase	0.979871	12.6022	3.84481	0.00142257	0.0143218	-1.25627
tetur30g01300	S-adenosyl-L-methionine-dependent methyltransferase	0.973281	10.4932	4.16108	0.000730889	0.00903657	-0.602648
tetur01g02660	Immunoglobulin E-set	0.95998	16.377	3.23614	0.00515006	0.0341498	-2.50712
tetur03g04290	Major facilitator superfamily; general substrate transporter	0.955307	11.3304	6.06103	1.6255e-05	0.000815324	3.16228
tetur01g11270	phytoene dehydrogenase	0.954193	11.1517	3.5693	0.00254761	0.0211074	-1.82512
tetur01g12890	Hypothetical protein	0.951556	11.8048	7.83823	7.05029e-07	0.000124404	6.25256
tetur184g00010	Hypothetical protein	0.949085	9.65629	3.62406	0.00226882	0.0194686	-1.71225
tetur03g02710	Scramblase	0.946511	11.4952	4.95062	0.000143101	0.00326046	1.00756
tetur06g06640	Cystatin	0.944746	8.46264	6.51426	7.01041e-06	0.000483927	3.99401
tetur06g04600	Hypothetical protein	0.938481	13.1823	6.09603	1.52177e-05	0.000777276	3.22755
tetur03g07950	Cathepsin B	0.935836	10.9111	4.25601	0.000599116	0.00794113	-0.406957
tetur02g01530	androgen-induced gene 1 protein	0.933852	9.63717	8.37984	2.94348e-07	7.79177e-05	7.10405
tetur16g03650	Legumain	0.923323	9.44473	4.50758	0.000354874	0.00572972	0.109496
tetur40g00120	Hypothetical protein	0.917361	6.43412	6.30861	1.0232e-05	0.000575304	3.62027
tetur08g05030	Cathepsin B	0.906606	15.0176	7.47989	1.28281e-06	0.000174118	5.66639
tetur26g02400	calponin-1	0.903748	12.6469	8.01328	5.29468e-07	0.000103984	6.53226
tetur47g00120	Hypothetical protein	0.890817	10.2014	3.81275	0.00152227	0.0148986	-1.32256
tetur38g00650	Cytochrome P450 - CYP384A1	0.884392	9.81459	5.62213	3.7686e-05	0.00135436	2.32941
tetur10g03190	Hypothetical protein	0.880897	9.67782	8.02363	5.20647e-07	0.000103713	6.54866
tetur07g01320	phosphatidylcholine-sterol acyltransferase	0.880645	10.9737	7.80004	7.50877e-07	0.000124404	6.19096
tetur36g01060	UDP-glycosyltransferase; teturUGT77	0.875558	11.8106	5.99164	1.85344e-05	0.000885083	3.03237
tetur05g00990	lipase 1 precursor	0.869982	11.9285	5.86691	2.35032e-05	0.00101779	2.79717
tetur16g02330	Domain of unknown function DUF2236	0.86548	9.97122	5.69953	3.24314e-05	0.00122554	2.47819
tetur12g01860	Cathepsin L	0.865212	16.3784	6.95318	3.18915e-06	0.000302514	4.77107
tetur28g01760	Legumain	0.864608	15.9686	5.17314	9.14112e-05	0.00239594	1.45142
tetur21g01410	Hypothetical protein	0.863802	13.286	3.04179	0.00774603	0.0449844	-2.89928
tetur338g00010	ab-hydrolase associated lipase region family protein	0.860361	12.4502	7.13012	2.33886e-06	0.000247068	5.07635
tetur05g01730	conserved secreted protein 1	0.858951	17.4362	6.33781	9.69366e-06	0.000565091	3.67371
tetur15g03160	adenylyltransferase and sulfurtransferase MOCS3	0.856009	6.8434	7.40108	1.46661e-06	0.00019064	5.535
tetur01g16506	Small Secreted Protein; putative	0.855058	6.48582	4.01624	0.000990952	0.0111795	-0.901806
tetur06g04550	Hypothetical protein	0.849418	12.1888	7.45998	1.32683e-06	0.000176203	5.63329
tetur05g05730	Wannes-Thomas Secreted Protein 11	0.845393	10.2042	5.31597	6.87699e-05	0.00202306	1.7334
tetur12g04600	Carboxyl/cholinesterase	0.842952	8.62141	10.8756	8.13036e-09	5.96683e-06	10.537
tetur11g05700	Hypothetical protein	0.841437	10.1844	4.38081	0.000461759	0.00676341	-0.150305
tetur09g01960	ABC-transporter; class G	0.831774	12.3727	6.34405	9.58261e-06	0.000561428	3.68511
tetur20g00020	Hypothetical protein	0.831618	13.1944	3.14857	0.00619205	0.0385455	-2.68449
tetur33g00630	Apple-like	0.829521	12.5267	7.24539	1.91539e-06	0.000222569	5.27276
tetur02g10940	glucosylceramidase precursor	0.829101	12.4218	5.45748	5.20009e-05	0.00167074	2.01036
tetur30g02040	phospholipid scramblase 1	0.825842	7.94181	3.52229	0.00281402	0.0224093	-1.92187
tetur08g08369	hypothetical protein	0.824572	8.61526	3.19783	0.00558268	0.0357251	-2.58483
tetur12g01840	Cysteine peptidase, histidine active site	0.824047	15.1143	8.08374	4.72344e-07	9.93397e-05	6.64363
tetur32g01960	Carbonyl reductase [NADPH] 1	0.822453	9.59714	3.9228	0.00120664	0.0127432	-1.095
tetur92g00010	Fibroin (new)	0.820396	9.75628	5.23915	8.01203e-05	0.00217777	1.58203
tetur31g01040	Immunodominant surface protein, Ehrlichia tandem repeat-containing	0.818202	15.9386	5.2637	7.62962e-05	0.00212482	1.63049
tetur11g00530	Cytochrome P450 - CYP392A6	0.817601	11.0957	6.05018	1.65911e-05	0.000824339	3.14203
tetur01g05230	Cathepsin B	0.817589	10.9169	3.39364	0.00369378	0.0269948	-2.18588
tetur11g04990	Nuclear hormone receptor, ligand-binding domain	0.812358	10.0489	7.45127	1.3466e-06	0.000177142	5.61878
tetur15g00560	Serine/threonine-protein kinase, active site	0.811451	9.37941	14.907	7.95797e-11	1.84943e-07	14.7266
tetur01g11240	amino acid transporter	0.804161	9.86352	5.00329	0.000128633	0.00303018	1.11309
tetur09g00490	Domain of unknown function DUF3421	0.802249	9.16308	3.99963	0.00102622	0.0114203	-0.936139
tetur04g07770	UDP-glycosyltransferase, teturUGT18	0.801824	9.74772	6.68818	5.11486e-06	0.000406508	4.30528
tetur05g04710	Legumain	0.793504	9.80127	5.18201	8.98025e-05	0.00236712	1.46901
tetur09g04630	Hypothetical protein	0.793461	14.168	8.32475	3.21158e-07	8.14222e-05	7.01931
tetur13g01200	Complement control module	0.793044	9.33014	5.46679	5.10588e-05	0.00165189	2.02848
tetur05g01110	ABC-transporter; class C;	0.789455	9.35108	6.48051	7.45629e-06	0.000497467	3.93309
tetur04g03940	Calponin-like actin-binding	0.789282	13.1347	5.67342	3.41138e-05	0.00126849	2.42809
tetur28g01250	intradiol ring-cleavage dioxygenase	0.787881	12.5936	3.31257	0.00438354	0.0305773	-2.35155
tetur14g03010	Pepsin	0.78501	16.1261	7.83056	7.14e-07	0.000124404	6.2402
tetur09g00570	Cathepsin B	0.780325	9.71749	7.54964	1.14022e-06	0.000162237	5.78194
tetur03g02860	Nuclear hormone receptor, ligand-binding domain	0.778958	8.96804	5.81235	2.60934e-05	0.00109263	2.69361
tetur07g03850	choline/ethanolamine kinase	0.778918	10.2758	3.3722	0.00386494	0.0279382	-2.22975
tetur09g04470	Cathepsin L-like	0.776593	14.3613	4.30416	0.000541767	0.0074796	-0.307832
tetur13g04460	3-oxoacyl-acyl-carrier-protein reductase	0.776528	7.72126	4.24014	0.000619337	0.00810895	-0.439646
tetur14g01650	Hypothetical protein	0.773416	13.4825	5.55461	4.29873e-05	0.00148004	2.19899
tetur01g00610	Hypothetical protein	0.768435	9.47347	5.01258	0.00012624	0.00300392	1.13168
tetur37g00660	poly	0.767453	8.09167	6.77672	4.36338e-06	0.00038266	4.46205
tetur09g03090	Hypothetical protein	0.767396	12.434	2.99508	0.00854065	0.0479818	-2.99268
tetur13g02290	IST1 homolog	0.764423	11.7088	7.11595	2.39731e-06	0.000249954	5.05206
tetur20g01410	Hypothetical protein	0.759952	13.6077	4.36605	0.000476166	0.00687336	-0.180603
tetur01g13270	Small Secreted Protein; family A	0.759118	14.0124	3.98183	0.00106544	0.011685	-0.972939
tetur43g00450	Hypothetical protein	0.758614	10.8308	5.96792	1.93874e-05	0.000913305	2.98782
tetur07g06710	PREDICTED: sodium-dependent glucose transporter 1-like; partial	0.758083	10.9484	5.28906	7.25444e-05	0.00206441	1.68045
tetur32g00960	Hypothetical protein	0.7572	8.0285	4.70306	0.000237134	0.00441441	0.507829
tetur01g92394	hypothetical protein	0.755499	11.053	5.43626	5.42179e-05	0.00171822	1.96899
tetur04g05980	Apolipoprotein D precursor	0.752085	15.0342	4.89413	0.000160491	0.00348038	0.894036
tetur05g04320	alpha/beta hydrolase fold protein	0.74837	11.5343	5.14727	9.62722e-05	0.00248137	1.4001
tetur10g03040	metallothionein	0.747865	13.9534	5.29593	7.156e-05	0.00204474	1.69399
tetur20g02080	NADH dehydrogenase subunit 3	0.745169	8.68198	4.94613	0.000144409	0.00327422	0.998551
tetur05g02820	Hypothetical protein	0.744469	8.34187	4.65089	0.000263978	0.00471317	0.401814
tetur04g02350	UDP-glycosyltransferase; teturUGT13	0.741643	9.69078	3.89071	0.00129118	0.013386	-1.16136
tetur01g03410	PREDICTED: similar to apical endosomal glycoprotein	0.739015	9.46301	5.15274	9.52222e-05	0.00246341	1.41096
tetur30g01430	apolipoprotein D precursor	0.737625	13.5311	4.1761	0.000708228	0.00887289	-0.571661
tetur39g00610	Hypothetical protein	0.737167	7.71109	3.44035	0.0033465	0.0252168	-2.09016
tetur31g01060	Armadillo-type fold	0.735793	14.6952	4.63466	0.000272945	0.00483232	0.368797
tetur16g03500	Cytochrome P450 - CYP392A7	0.734375	9.93612	5.1743	9.1199e-05	0.00239488	1.45372
tetur01g15480	Hypothetical protein	0.733669	10.7501	5.44016	5.38041e-05	0.00170898	1.97658
tetur06g03020	Lipocalin family conserved site	0.731825	10.6242	4.23262	0.000629163	0.00818131	-0.455147
tetur10g00220	Wnt inhibitory factor (WIF)-1	0.730181	9.06555	5.2996	7.10413e-05	0.00204247	1.7012
tetur23g00890	Cathepsin L-like	0.730153	13.6492	3.65077	0.00214416	0.0187098	-1.65716
tetur19g01150	TVP18/Calcium channel flower	0.730103	10.0904	8.16664	4.1331e-07	9.44034e-05	6.77376
tetur28g00980	Hypothetical protein	0.728808	10.923	5.09368	0.000107205	0.00266466	1.29355
tetur20g02940	Hypothetical protein	0.727467	12.7445	4.81156	0.000189895	0.00384869	0.727556
tetur20g00290	Cytochrome P450 - CYP392B3	0.726752	11.8023	7.15211	2.25108e-06	0.000245099	5.11398
tetur23g01600	secreted salivary gland peptide; putative	0.724213	11.4798	4.55048	0.00032473	0.00541212	0.197157
tetur24g00270	Cathepsin B	0.724159	9.23267	8.41789	2.77209e-07	7.57923e-05	7.16235
tetur33g01450	3-Pan modules Cell Surface Protein; Antigen-B homolog	0.723387	10.1922	5.68889	3.31064e-05	0.00124095	2.45779
tetur02g09080	sialin; putative	0.71797	9.52766	5.03602	0.000120405	0.00289971	1.17855
tetur41g00180	tropomyosin	0.713356	12.3535	5.75003	2.94174e-05	0.00116533	2.57483
tetur22g02130	Lipase/lipooxygenase; PLAT/LH2	0.71219	10.2593	4.70163	0.00023783	0.00441441	0.504932
tetur05g01660	Alpha/Beta hydrolase fold	0.709331	13.1465	4.2458	0.000612039	0.00804361	-0.427974
tetur07g01400	ceramidase	0.707621	13.7534	6.37268	9.08935e-06	0.000543956	3.73736
tetur02g07800	Hypothetical protein	0.706719	8.66799	5.95342	1.9929e-05	0.000929819	2.96054
tetur161g00030	Deoxyuridine triphosphate nucleotidohydrolase/Deoxycytidine triphosphate deaminase	0.704292	6.86664	5.56819	4.18618e-05	0.00145204	2.22528
tetur11g02060	ABC-transporter; class C;	0.703292	8.62359	5.15924	9.39908e-05	0.00244973	1.42385
tetur05g00810	RNA binding	0.702728	8.50461	4.93892	0.000146536	0.00330018	0.984075
tetur19g01840	Tetraspanin; large extracellular loop CD-63 antigen_like family	0.702569	14.4761	6.70332	4.97742e-06	0.000406508	4.33216
tetur31g00630	Armadillo-type fold	0.701443	14.0691	3.80613	0.00154373	0.0150215	-1.33626
tetur17g00360	Carboxyl/cholinesterase; incomplete	0.699491	10.1342	4.01308	0.000997561	0.0112359	-0.908332
tetur27g00080	Hypothetical protein	0.697888	7.79472	4.32185	0.000522133	0.00726608	-0.271452
tetur04g02050	hypothetical protein IscW_ISCW020080	0.694148	8.8845	4.91597	0.000153525	0.00339263	0.937959
tetur16g00900	SH3-binding, glutamic acid-rich protein	0.693646	10.7195	4.9442	0.000144978	0.00327645	0.994662
tetur517g00010	Hypothetical protein	0.693626	7.74847	4.33535	0.000507631	0.00713549	-0.243689
tetur01g11040	Zinc finger, nuclear hormone receptor-type	0.692378	10.7373	7.94199	5.94686e-07	0.000113593	6.41887
tetur03g02890	PREDICTED: similar to adenylate cyclase	0.692322	9.86018	5.00085	0.000129269	0.00303968	1.10821
tetur30g01630	UNC93-like protein MFSD11	0.692319	9.07493	5.02067	0.000124194	0.00298066	1.14786
tetur06g06100	UDP-glycosyltransferase; teturUGT35	0.691305	10.8628	6.6246	5.73687e-06	0.000434755	4.192
tetur03g04050	Thioredoxin-like protein 4A	0.68792	8.66355	5.2613	7.66623e-05	0.00212482	1.62575
tetur07g02990	MDL1	0.685697	7.75309	4.70022	0.000238519	0.00441441	0.502072
tetur21g01600	Alpha/Beta hydrolase fold	0.685125	8.53049	4.16082	0.000731301	0.00903657	-0.603201
tetur12g04180	Leucine-rich repeat domain, L domain-like	0.684652	7.33725	6.15725	1.35653e-05	0.00071379	3.34131
tetur04g07700	PREDICTED: similar to DNA topoisomerase type I	0.683472	9.29972	7.73551	8.35562e-07	0.000132452	6.08642
tetur22g00690	minor tail protein gp26-like	0.680989	8.1246	3.29653	0.0045344	0.0313941	-2.38425
tetur35g00650	innexin; putative	0.680415	12.1288	7.03436	2.76477e-06	0.000277562	4.9117
tetur28g02460	medium-chain specific acyl-CoA dehydrogenase; mitochondrial precursor	0.680366	13.4752	5.48304	4.94549e-05	0.00162259	2.06011
tetur17g02360	Hypothetical protein	0.677235	6.98666	4.34732	0.000495124	0.00703772	-0.219096
tetur02g03300	UDP-glycosyltransferase; teturUGT09	0.676664	8.74044	5.67364	3.4099e-05	0.00126849	2.42852
tetur18g01260	cathepsin A	0.675751	14.3491	3.45409	0.00325067	0.0248852	-2.06198
tetur10g03800	sarm1	0.675251	8.87619	6.56686	6.3701e-06	0.000460428	4.08862
tetur02g08740	Hypothetical protein	0.674995	10.0631	7.3462	1.61073e-06	0.000200536	5.44297
tetur23g02180	AMP-dependent synthetase and ligase	0.674248	11.0256	8.44882	2.6405e-07	7.36382e-05	7.20959
tetur04g02770	Carboxyl/cholinesterase	0.671602	10.8506	5.14197	9.72999e-05	0.00250025	1.38958
tetur06g04530	Hypothetical protein	0.670305	10.5026	4.71532	0.000231241	0.00434303	0.532711
tetur06g04210	CCAAT/enhancer binding protein alpha	0.67007	8.77842	4.75714	0.000212248	0.00410484	0.617471
tetur08g03410	solute carrier family 25 member 38	0.669012	8.5374	9.8317	3.36398e-08	1.6175e-05	9.19342
tetur17g01720	Hypothetical protein	0.666131	10.5568	4.74508	0.000217552	0.00417269	0.593059
tetur07g06330	Hypothetical protein	0.662136	11.7331	6.39873	8.66345e-06	0.000527525	3.7848
tetur26g01480	PREDICTED: iron/zinc purple acid phosphatase-like protein-like	0.660752	12.3736	10.3658	1.60488e-08	9.32433e-06	9.89635
tetur16g02150	Glyoxalase/Bleomycin resistance protein/Dihydroxybiphenyl dioxygenase	0.655267	12.3251	5.00817	0.000127372	0.00301146	1.12285
tetur11g03670	regulator of microtubule dynamics protein 3	0.653032	12.1407	5.80192	2.66213e-05	0.00110478	2.67377
tetur01g15010	Apple-like	0.651793	9.86481	4.91347	0.000154305	0.00339801	0.932943
tetur15g01970	conserved secreted protein 1	0.651716	15.8761	3.62833	0.00224842	0.0193531	-1.70344
tetur07g06430	UDP-glycosyltransferase; teturUGT38	0.651643	10.4831	3.14343	0.00625928	0.0387736	-2.69487
tetur27g00260	alpha-tocopherol transfer protein-like	0.649812	9.7639	3.03619	0.00783744	0.0452259	-2.91051
tetur05g05200	Glutathione S-transferase; class mu	0.649124	12.6984	8.24183	3.66441e-07	8.80975e-05	6.89097
tetur01g10390	ABC-transporter; class C;	0.643428	9.7087	4.08701	0.000853887	0.0100989	-0.755581
tetur14g00190	innexin; putative	0.643238	11.2908	4.50797	0.000354588	0.00572972	0.110292
tetur27g00090	cuticular protein analogous to peritrophins 1-A	0.640718	9.36698	3.08372	0.00709484	0.0423685	-2.81515
tetur01g15950	Acyl transferase/acyl hydrolase/lysophospholipase	0.639535	11.6289	3.70861	0.0018972	0.0172006	-1.53775
tetur17g00890	PREDICTED: similar to adenylate cyclase	0.636497	9.65646	6.67706	5.21837e-06	0.000406508	4.28551
tetur20g00580	Nose resistant-to-fluoxetine protein; N-terminal	0.633294	11.0598	5.74614	2.96392e-05	0.00117079	2.56739
tetur06g02400	Cytochrome P450 - CYP392E2	0.633277	8.01436	3.70732	0.00190238	0.0172252	-1.54042
tetur03g91512	hypothetical protein	0.633007	10.2592	4.28231	0.000567061	0.00765449	-0.352791
tetur11g02000	Alpha/Beta hydrolase fold	0.628028	11.9418	4.79064	0.000198186	0.00395352	0.685275
tetur130g00020	ADP/ATP translocase	0.626427	11.0128	4.7553	0.000213046	0.00411456	0.613761
tetur20g03210	PREDICTED: similar to adenylate cyclase	0.626202	8.27014	4.36965	0.000472611	0.00685753	-0.173213
tetur12g03210	Hypothetical protein	0.625861	8.79234	6.82899	3.97471e-06	0.000361273	4.55406
tetur17g00410	Carboxyl/cholinesterase	0.62414	7.89135	5.51312	4.6622e-05	0.00155155	2.11856
tetur19g00240	cuticular protein analogous to peritrophins 1-A	0.623903	8.98786	3.28066	0.00468882	0.0321756	-2.41659
tetur30g01820	Hypothetical protein	0.622084	10.8619	5.73601	3.02242e-05	0.00117722	2.54803
tetur24g00360	Hypothetical protein	0.620916	10.284	4.09832	0.000833831	0.0099206	-0.73222
tetur77g00070	Deoxyuridine triphosphate nucleotidohydrolase/Deoxycytidine triphosphate deaminase	0.61985	6.92788	3.05584	0.0075215	0.0442653	-2.87112
tetur01g02960	Peptidase M28	0.619128	11.7851	5.11486	0.00010274	0.00258894	1.33569
tetur39g00360	3-Pan modules Cell Surface Protein; antigen-2	0.617664	12.3473	5.88678	2.26275e-05	0.000995091	2.83478
tetur20g03200	Cytochrome P450 - CYP392B1	0.616568	8.40889	5.71869	3.12521e-05	0.00120071	2.51489
tetur24g00280	Cathepsin B	0.616533	9.81907	5.93885	2.04891e-05	0.000932122	2.93309
tetur14g02620	FAD dependent oxidoreductase	0.616458	9.78283	4.49112	0.000367192	0.00583823	0.0758078
tetur17g00300	Carboxyl/cholinesterase	0.614757	9.17909	4.20306	0.000669322	0.00848276	-0.516059
tetur02g05980	FERM/acyl-CoA-binding protein; 3-helical bundle	0.613483	12.3075	7.26032	1.86672e-06	0.000221866	5.29806
tetur13g03820	Proteinase inhibitor I2; Kunitz metazoa	0.612473	11.2195	5.58261	4.07006e-05	0.00141882	2.25316
tetur01g16230	Hypothetical protein	0.612281	9.04274	7.02224	2.82417e-06	0.000279893	4.89077
tetur01g07900	Type-II Transmembrane Protein	0.611751	12.6718	4.82092	0.000186302	0.00383155	0.746457
tetur23g01690	dentin sialophosphoprotein precursor	0.611069	11.2467	5.76636	2.85062e-05	0.00114882	2.606
tetur24g00640	Hypothetical protein	0.609809	10.6814	3.81257	0.00152286	0.0148986	-1.32294
tetur40g00150	Hypothetical protein	0.609764	15.0894	3.10223	0.00682472	0.0411965	-2.77792
tetur11g01560	Carboxyl/cholinesterase	0.605797	11.0361	3.21665	0.00536586	0.0350781	-2.54668
tetur06g03470	Leucine-rich repeat domain, L domain-like	0.604922	9.49754	7.24641	1.91202e-06	0.000222569	5.2745
tetur07g00740	MAM	0.603776	10.817	3.44047	0.00334564	0.0252168	-2.08992
tetur11g01250	UDP-glycosyltransferase; teturUGT51	0.599751	11.2167	5.82547	2.54448e-05	0.00107516	2.71855
tetur15g02010	Neuropeptide precursor.	0.599376	8.91825	4.2023	0.000670396	0.00848276	-0.517637
tetur11g06390	hypothetical protein	0.599164	15.568	4.27811	0.00057206	0.00770706	-0.361439
tetur35g00570	Hypothetical protein	0.599014	7.30436	5.50435	4.74301e-05	0.00156722	2.10153
tetur43g00570	Hypothetical protein	0.598527	6.25842	4.56001	0.000318397	0.00534907	0.21661
tetur08g06160	Cytochrome P450 - CYP387A1-p1 pseudogene	0.596669	10.9689	4.20033	0.000673166	0.00850238	-0.521695
tetur12g01830	Cathepsin L	0.595852	14.1548	4.13639	0.000769763	0.00931734	-0.653617
tetur07g05910	Scramblase	0.595599	10.5423	4.92748	0.000149978	0.00333539	0.961095
tetur08g05110	Hypothetical protein	0.5928	8.13045	3.38281	0.00377931	0.027499	-2.20806
tetur06g05850	Zinc finger, RING/FYVE/PHD-type	0.592506	12.3813	4.64639	0.000266432	0.00474392	0.392666
tetur09g00510	Domain of unknown function DUF3421	0.59201	9.08287	5.70148	3.23094e-05	0.00122425	2.48193
tetur04g07030	sorbitol dehydrogenase	0.590523	10.723	3.36407	0.00393194	0.0283197	-2.24639
tetur21g02440	sodium iodide symporter	0.586867	7.46646	3.76402	0.00168743	0.0158235	-1.42329
tetur13g00270	CD63 antigen	0.585737	7.61919	6.56379	6.40584e-06	0.000460428	4.08309
tetur09g04770	Cystatin	0.585266	14.3264	4.46853	0.000384801	0.00602103	0.029571
tetur08g06780	Hypothetical protein	-0.585311	7.35057	-3.09258	0.00696425	0.0417675	-2.79734
tetur30g02260	Glycoside hydrolase; subgroup; catalytic core	-0.587048	11.4181	-5.17698	9.07103e-05	0.00238654	1.45905
tetur02g09730	adenylosuccinate lyase	-0.59053	11.0017	-4.36723	0.000475001	0.00687336	-0.178187
tetur02g03050	protein NDRG1	-0.59511	13.0474	-5.15286	9.51993e-05	0.00246341	1.4112
tetur05g08770	Uncharacterised protein family UPF0544	-0.595163	12.9027	-5.25381	7.78135e-05	0.00214433	1.61098
tetur02g10570	ortholog of Argonaute-1 (Drosophila melanogaster)	-0.595928	10.9488	-7.13072	2.3364e-06	0.000247068	5.07738
tetur03g01400	RabGAP/TBC	-0.598009	13.3946	-4.40357	0.000440399	0.00658897	-0.103592
tetur12g03060	Protein of unknown function DUF3827	-0.601979	10.8578	-4.24827	0.000608888	0.00802489	-0.422891
tetur10g01720	major ampullate spidroin 1	-0.603817	7.2837	-4.93663	0.00014722	0.0033057	0.979467
tetur07g01520	Histone-fold	-0.60584	13.8028	-8.13096	4.37711e-07	9.688e-05	6.71786
tetur21g00360	Myc-type, basic helix-loop-helix (bHLH) domain	-0.60801	9.65343	-5.08733	0.000108584	0.00268458	1.28089
tetur30g00260	Acyltransferase 3	-0.610016	11.0772	-5.34353	6.51133e-05	0.00194004	1.78754
tetur18g00150	MUscle Attachment abnormal family member	-0.612247	8.05045	-7.19088	2.10465e-06	0.000231081	5.18013
tetur09g04250	DMRT/protein doublesex/protein male abnormal 3	-0.612376	8.69044	-3.93402	0.00117842	0.012553	-1.0718
tetur03g01210	N-acylneuraminate cytidylyltransferase	-0.61786	9.2763	-3.60735	0.00235049	0.0199605	-1.7467
tetur10g00100	Hypothetical protein	-0.620485	13.0926	-3.56144	0.00259033	0.0213095	-1.8413
tetur01g10560	Pheromone shutdown, TraB	-0.622495	10.0687	-6.01172	1.78426e-05	0.000857921	3.07003
tetur05g08670	Hypothetical protein	-0.62557	11.1027	-4.33616	0.000506775	0.00713549	-0.242026
tetur10g01330	Hypothetical protein	-0.627191	7.90722	-4.35548	0.000486771	0.00694732	-0.202321
tetur25g00820	SMC2 protein	-0.648865	8.86792	-6.14626	1.38476e-05	0.000725345	3.32093
tetur03g09961	Cytochrome P450, conserved site	-0.650496	8.48759	-3.43377	0.0033934	0.0254404	-2.10366
tetur22g01680	Secreted Protein of Unknown Function; family A	-0.651986	9.66507	-5.24962	7.84657e-05	0.00215804	1.60271
tetur16g01170	Hypothetical protein	-0.654965	11.9452	-4.25269	0.000603293	0.00797997	-0.413799
tetur13g04120	exosome complex RNA-binding protein Rrp42	-0.655304	8.9183	-5.96024	1.96723e-05	0.000923605	2.97337
tetur13g01810	serine/threonine-protein kinase 3	-0.655395	10.7253	-6.69084	5.09044e-06	0.000406508	4.31
tetur22g02981	CAAX amino terminal protease	-0.662769	14.0039	-5.27067	7.52459e-05	0.00210689	1.64422
tetur06g03100	Apolipoprotein D	-0.664204	10.8626	-3.78697	0.00160753	0.0153612	-1.37586
tetur31g00420	PREDICTED: DDB1- and CUL4-associated factor 17 isoform 1	-0.666151	11.646	-4.64586	0.000266727	0.00474392	0.391575
tetur05g03220	Homeobox, conserved site	-0.666703	9.33111	-4.16512	0.000724727	0.00898274	-0.594317
tetur13g04180	conserved hypothetical protein	-0.676167	11.3439	-4.9759	0.000135961	0.00314923	1.05824
tetur19g03010	Hypothetical protein	-0.685723	11.7616	-5.97791	1.90234e-05	0.000899195	3.00658
tetur10g05570	Hypothetical protein	-0.686007	8.63112	-6.31857	1.0045e-05	0.000569681	3.63851
tetur11g04720	Hypothetical protein	-0.686948	9.60282	-5.27849	7.40849e-05	0.00208695	1.65963
tetur01g03610	Hypothetical protein	-0.691028	8.91937	-5.5103	4.68802e-05	0.00155642	2.11309
tetur01g09880	Hypothetical protein	-0.692413	11.4144	-3.77935	0.00163362	0.0154856	-1.39161
tetur15g00690	PREDICTED: similar to F55A4.8a	-0.70108	8.95239	-6.31982	1.00218e-05	0.000569681	3.6408
tetur02g12030	Transcription factor SOX	-0.71372	10.1665	-5.30055	7.09071e-05	0.00204247	1.70307
tetur16g03760	Hypothetical protein	-0.717615	6.61788	-4.46106	0.000390807	0.00603836	0.014286
tetur09g00480	Domain of unknown function DUF3421	-0.719576	9.52289	-3.81416	0.00151773	0.0148951	-1.31964
tetur14g02060	Immunoglobulin E-set	-0.71974	13.7345	-5.01807	0.000124849	0.00298609	1.14266
tetur26g01740	HMW kininogen	-0.726205	8.73675	-7.96651	5.71348e-07	0.000110651	6.45796
tetur01g01010	Orphan Secreted protein	-0.72739	15.7394	-4.29037	0.000557599	0.00760222	-0.336213
tetur03g05420	Homeodomain-like	-0.727532	7.91839	-6.60411	5.95374e-06	0.00044159	4.15537
tetur14g04180	n/a	-0.741737	7.7585	-3.80836	0.00153647	0.0149822	-1.33164
tetur26g01130	Carboxyl/cholinesterase	-0.742899	14.9206	-6.42852	8.20168e-06	0.000512844	3.83893
tetur03g07020	Apple-like	-0.763896	7.22603	-6.27094	1.09726e-05	0.000609568	3.55116
tetur04g05460	10-formyltetrahydrofolate dehydrogenase	-0.766555	9.72847	-3.05606	0.00751803	0.0442653	-2.87068
tetur23g00120	PAN/Apple domain	-0.769594	6.82265	-4.90935	0.000155603	0.00340617	0.924649
tetur12g00700	Small Secreted Protein; Family F	-0.772504	9.18774	-3.8187	0.00150327	0.0148058	-1.31027
tetur01g00080	Histidine-rich secreted peptide	-0.774611	9.09303	-4.02319	0.00097655	0.0110798	-0.887433
tetur01g14770	myo-inositol 2-dehydrogenase	-0.778707	14.4238	-4.42233	0.000423548	0.00641255	-0.0651049
tetur22g01100	nucleoprotein	-0.819033	11.4752	-5.24159	7.9731e-05	0.00217777	1.58686
tetur17g03390	Domain of unknown function DUF3421	-0.821951	9.57123	-6.43591	8.09122e-06	0.000512844	3.85234
tetur14g03240	Hypothetical protein	-0.828609	6.88709	-4.58461	0.00030262	0.00516112	0.266816
tetur40g00392	Trypsin Inhibitor-like, cysteine rich domain	-0.835036	12.1776	-5.73853	3.00772e-05	0.00117478	2.55286
tetur12g00580	Hypothetical protein	-0.844973	8.17662	-6.57328	6.29627e-06	0.000459661	4.10013
tetur14g02070	Immunoglobulin E-set	-0.865464	14.6152	-3.70448	0.00191385	0.0173066	-1.54629
tetur06g00310	sodium-dependent phosphate transporter	-0.8686	9.92316	-7.84875	6.92924e-07	0.000124404	6.26949
tetur20g01790	intradiol ring-cleavage dioxygenase	-0.869286	14.0215	-4.81622	0.000188096	0.00384869	0.736974
tetur01g03880	Methyltransferase type 11	-0.872373	8.77777	-3.37321	0.00385671	0.0278931	-2.22769
tetur05g05630	Geneb-a protein	-0.874121	7.01693	-5.47657	5.00868e-05	0.00163088	2.04753
tetur19g02210	Hypothetical protein	-0.887964	11.9133	-4.71495	0.000231417	0.00434303	0.531962
tetur16g03690	PAN/Apple domain	-0.893135	6.94634	-6.59176	6.08859e-06	0.000449203	4.13325
tetur06g03090	Apolipoprotein D related protein	-0.897845	10.0685	-5.09152	0.000107673	0.00267152	1.28923
tetur09g03550	Hypothetical Cell Surface Protein	-0.906511	6.34295	-6.97642	3.06112e-06	0.000297117	4.81143
tetur21g03340	Calycin-like	-0.919596	7.19482	-6.20272	1.24593e-05	0.000676003	3.42546
tetur11g02480	PREDICTED: similar to sodium-dependent phosphate transporter	-0.947525	8.8338	-3.22461	0.00527673	0.0346906	-2.53054
tetur16g02380	Carboxyl/cholinesterase	-0.97989	13.6131	-3.73827	0.00178184	0.016477	-1.47649
tetur23g00740	UDP-glucuronosyl/UDP-glucosyltransferase	-1.01161	13.3754	-5.07895	0.00011043	0.00271264	1.2642
tetur06g02510	Hypothetical protein	-1.02468	10.6007	-6.50713	7.10228e-06	0.000487038	3.98115
tetur01g01000	Orphan secreted protein	-1.02684	14.4487	-6.22847	1.1875e-05	0.000649352	3.47298
tetur04g09459	Small Secreted Protein; Family F	-1.04996	13.8784	-5.8388	2.4803e-05	0.00105122	2.74385
tetur02g13950	Hypothetical protein	-1.06785	8.85613	-4.22946	0.000633338	0.00819009	-0.461658
tetur17g00740	Hypothetical protein	-1.08367	9.03001	-3.52933	0.00277243	0.022193	-1.90739
tetur18g03020	Hypothetical protein	-1.10907	14.046	-3.45547	0.00324122	0.0248327	-2.05915
tetur12g00570	C-signal	-1.10944	9.87262	-6.74077	4.6536e-06	0.000393271	4.39853
tetur17g02390	Concanavalin A-like lectin/glucanase	-1.11156	10.7383	-6.49756	7.2275e-06	0.00048919	3.96388
tetur22g02750	Small Secreted Protein; family A	-1.13441	8.46974	-5.4854	4.92263e-05	0.0016189	2.0647
tetur05g04550	Legumain	-1.14174	8.08995	-8.02606	5.18594e-07	0.000103713	6.55251
tetur21g03160	Calycin-like	-1.21641	8.51248	-5.93248	2.07391e-05	0.00093458	2.92108
tetur30g01350	PREDICTED: ectonucleotide pyrophosphatase/phosphodiesterase 5	-1.28731	12.0523	-3.8309	0.001465	0.0145395	-1.28504
tetur18g92102	hypothetical protein	-1.28877	15.1608	-5.13526	9.86181e-05	0.00251395	1.37625
tetur13g01730	Hypothetical protein	-1.33818	14.4747	-4.92843	0.000149688	0.00333427	0.963008
tetur04g00770	Small Secreted Protein; Family F	-1.34687	13.362	-5.24449	7.9271e-05	0.0021759	1.59259
tetur06g05110	3-oxoacyl-acyl-carrier-protein reductase	-1.3822	12.751	-6.44924	7.89575e-06	0.000507468	3.8765
tetur05g05450	Hypothetical protein	-1.44712	10.3001	-5.29653	7.14745e-05	0.00204474	1.69517
tetur63g00050	hypothetical phage protein	-1.54189	9.99324	-3.64125	0.00218779	0.0188895	-1.6768
tetur22g02640	Insect antifreeze protein	-1.54529	10.5033	-5.24055	7.98957e-05	0.00217777	1.58482
tetur30g01870	Hypothetical protein	-1.55749	9.38319	-8.22432	3.76837e-07	8.90613e-05	6.86373
tetur22g02670	hypothetical phage protein	-1.57857	10.4432	-3.52977	0.00276983	0.022193	-1.90648
tetur04g00520	Hypothetical protein	-1.6404	9.69999	-7.25697	1.87752e-06	0.000221866	5.29239
tetur13g04170	GE26306	-1.73163	11.903	-5.02435	0.000123275	0.0029637	1.15522
tetur05g05020	UDP-glycosyltransferase; teturUGT26	-1.78245	8.88355	-7.23822	1.93924e-06	0.000223477	5.2606
tetur06g05090	short chain dehydrogenase	-1.86032	9.84458	-8.87247	1.37222e-07	4.78357e-05	7.84363
tetur06g05070	short-chain dehydrogenase/reductase SDR	-1.94149	9.19282	-10.4248	1.48139e-08	8.98106e-06	9.97206
tetur17g00080	Carboxyl/cholinesterase	-2.4803	9.03686	-11.9395	2.1232e-09	2.39674e-06	11.7855
tetur12g00590	C-factor	-2.6786	9.16368	-18.1205	4.09272e-12	1.9023e-08	17.2102
tetur01g14180	Carboxyl/cholinesterase	-2.91663	11.1983	-13.7062	2.79337e-10	4.86884e-07	13.6231
tetur03g08840	Type II Keratin; homologue of keratin 78	-3.23612	14.56	-18.8357	2.25705e-12	1.57361e-08	17.6845
tetur03g10063	Small Secreted Protein; Family B	-3.3241	11.4639	-20.3978	6.59178e-13	9.19158e-09	18.637
tetur19g03360	Intradiol ring-cleavage dioxygenase, core	-3.34043	13.4735	-13.9896	2.05969e-10	4.10291e-07	13.8934
tetur11g05720	Lipase/lipooxygenase; PLAT/LH2	-3.67761	13.6092	-11.3345	4.50075e-09	3.69167e-06	11.0897
tetur11g05730	PLAT/LH2 domain	-4.24695	13.2541	-12.0656	1.82248e-09	2.31024e-06	11.926
* T. urticae IDs can be accessed at the ORCAE database (Sterck et al. 2012, doi: 10.1038/nmeth.2242) available at http://bioinformatics.psb.ugent.be/orcae/overview/Tetur

## Sheet: soybean
Table S1 - Differential gene expression analysis of the different T. urticae host plant populations. Differentially expressed genes (absolute log2FC ≥ 0.585 and Benjamini-Hochberg adjusted p-value < 0.05) between adult T. urticae females of the soybean (Glycine max) population compared to adult T. urticae females of the parental population on common bean (Phaseolus vulgaris)
T.urticae gene ID*	description	log2 FC	AveExpr	t	P.Value	adj.P.Val	B
tetur01g16584	Lipocalin, ApoD type	3.6911	7.34446	14.2103	1.63072e-10	2.52653e-07	14.2992
tetur11g05100	adenylate cyclase	3.58887	9.52334	15.0156	7.13487e-11	1.42127e-07	15.0555
tetur14g02720	Hypothetical protein	3.50791	11.1849	8.7411	1.67717e-07	2.16542e-05	7.64439
tetur06g01580	Glycoside hydrolase; subgroup; catalytic core	2.95468	11.0052	7.1094	2.42482e-06	0.000108371	4.98858
tetur01g12410	Hypothetical protein	2.70439	7.25934	17.2653	8.58227e-12	5.98356e-08	16.9428
tetur11g05520	Cytochrome P450 - CYP385C4	2.66512	10.2346	15.2087	5.8862e-11	1.36795e-07	15.23
tetur03g02880	PREDICTED: similar to adenylate cyclase	2.46653	7.59604	9.27725	7.48757e-08	1.28549e-05	8.43931
tetur01g01520	Apolipoprotein D precursor; putative	2.36343	11.0126	8.84026	1.44116e-07	1.99589e-05	7.79418
tetur20g00570	Hypothetical protein	2.35112	8.34096	32.0194	5.59708e-16	7.80456e-12	24.2456
tetur11g06110	adenylate cyclase	2.34786	9.2978	9.16651	8.8208e-08	1.41376e-05	8.27811
tetur03g03670	Hypothetical protein	2.28416	15.5515	9.78706	3.5834e-08	8.48085e-06	9.16204
tetur01g10810	Carboxyl/cholinesterase	2.25191	10.4208	7.84545	6.96698e-07	4.99498e-05	6.23218
tetur46g00150	Cytochrome P450 - CYP385C4v2	2.23656	10.0115	11.4375	3.95131e-09	2.04063e-06	11.2989
tetur38g00723	n/a	2.16483	9.54643	8.60749	2.06123e-07	2.47258e-05	7.44054
tetur08g06330	sialin	2.11703	10.7669	7.40256	1.46292e-06	7.6688e-05	5.49308
tetur13g04070	Hypothetical protein	2.10382	9.67854	2.92874	0.00980752	0.0356786	-3.25733
tetur09g04920	apolipoprotein D precursor	1.97634	10.2487	4.53094	0.00033812	0.00305643	0.0480024
tetur02g14350	Chemosensory Receptor; Gustatory receptor family	1.94966	6.89543	9.64168	4.40874e-08	9.49475e-06	8.95914
tetur07g03960	apolipoprotein D	1.83498	9.97651	9.63896	4.42598e-08	9.49475e-06	8.95532
tetur04g01130	pyrroline-5-carboxylate reductase	1.82253	7.01716	8.17687	4.06582e-07	3.75455e-05	6.76739
tetur03g02680	PREDICTED: similar to adenylate cyclase	1.79339	8.10586	7.24254	1.92483e-06	9.2233e-05	5.21922
tetur22g00690	minor tail protein gp26-like	1.76293	8.1246	8.534	2.31091e-07	2.61978e-05	7.32741
tetur28g01140	3-oxoacyl-acyl-carrier-protein reductase	1.76093	11.1791	4.10382	0.000824247	0.00578425	-0.837292
tetur20g01790	intradiol ring-cleavage dioxygenase	1.75668	14.0215	9.73277	3.87078e-08	8.9957e-06	9.08656
tetur10g05770	UDP-glucuronosyl/UDP-glucosyltransferase	1.70206	7.27341	15.2889	5.43715e-11	1.36795e-07	15.3018
tetur08g01910	mitochondrial sodium/hydrogen exchanger NHA2	1.69212	8.37233	5.14143	9.74056e-05	0.0013085	1.29067
tetur17g02900	Phytanoyl-CoA dioxygenase	1.67548	8.16976	9.58391	4.79023e-08	9.75166e-06	8.87782
tetur21g03190	Calycin-like	1.67299	8.46015	12.1346	1.67732e-09	1.19861e-06	12.1171
tetur03g05030	Cytochrome P450 - CYP392D6	1.63592	10.4266	4.24381	0.000614602	0.00470105	-0.546243
tetur28g00360	beta-mannosidase	1.63246	13.0869	8.93108	1.25551e-07	1.82363e-05	7.93027
tetur03g08710	Hypothetical protein	1.6295	12.867	7.66483	9.39921e-07	5.93044e-05	5.93408
tetur10g00090	Glycine-rich secreted protein	1.62797	16.2922	8.61312	2.04333e-07	2.47258e-05	7.44917
tetur16g03810	NAD(P):short chain dehydrogenase/reductase family 16C	1.62107	11.3657	5.90423	2.1886e-05	0.00048518	2.78606
tetur04g05460	10-formyltetrahydrofolate dehydrogenase	1.59177	9.72847	6.346	9.54812e-06	0.000264963	3.61721
tetur30g01800	Hypothetical protein	1.57197	11.4064	5.01016	0.00012686	0.00155717	1.02644
tetur11g05010	Hypothetical protein	1.54475	7.6008	4.99254	0.000131459	0.0015981	0.990836
tetur30g01750	PREDICTED: hypothetical protein	1.53768	8.34485	5.76579	2.85376e-05	0.000584329	2.52013
tetur04g00770	Small Secreted Protein; Family F	1.50586	13.362	5.86358	2.36535e-05	0.000509245	2.70823
tetur11g05760	Carboxyl/cholinesterase	1.49239	8.34837	5.69602	3.26529e-05	0.000633258	2.38514
tetur01g10820	Carboxyl/cholinesterase	1.48839	8.36995	11.3053	4.67064e-09	2.24577e-06	11.1384
tetur01g08370	Leucine-rich repeat domain, L domain-like	1.46821	8.28703	6.92855	3.33095e-06	0.000133853	4.67123
tetur31g01330	Glutathione S-transferase; class delta	1.40983	10.9275	4.79213	0.000197585	0.0021226	0.583755
tetur08g91626	hypothetical protein	1.39757	11.7444	5.40149	5.80648e-05	0.000904644	1.8085
tetur17g02920	Phytanoyl-CoA dioxygenase	1.39572	6.83511	6.96353	3.13147e-06	0.00012805	4.73298
tetur07g07140	Hypothetical protein	1.39456	7.81319	5.4932	4.8479e-05	0.000809714	1.98921
tetur03g05000	Cytochrome P450 - CYP392D3	1.37108	10.367	5.20508	8.57562e-05	0.0011986	1.41813
tetur02g03300	UDP-glycosyltransferase; teturUGT09	1.36483	8.74044	11.4437	3.92085e-09	2.04063e-06	11.3064
tetur30g00660	Aldo-keto reductase family A	1.35934	10.39	6.95374	3.18603e-06	0.000129901	4.71571
tetur01g12220	Cysteine-rich secretory protein, allergen V5/Tpx-1-related	1.34134	11.5484	6.50225	7.1659e-06	0.000224542	3.90465
tetur01g04980	Hypothetical protein	1.34006	6.50021	4.97795	0.000135397	0.00162756	0.961337
tetur16g01680	5'-nucleotidase	1.33718	7.24114	5.66663	3.45659e-05	0.000656657	2.3281
tetur20g00720	Hypothetical protein	1.31717	8.29675	7.54901	1.14142e-06	6.71562e-05	5.74054
tetur20g01840	Hypothetical protein	1.29402	9.2965	6.96974	3.09737e-06	0.000127403	4.74392
tetur23g01600	secreted salivary gland peptide; putative	1.29255	11.4798	8.12155	4.44392e-07	3.84882e-05	6.67911
tetur05g00320	delta	1.28599	12.4747	3.72937	0.00181572	0.010168	-1.61707
tetur05g04720	secreted salivary gland peptide; putative	1.28294	11.2424	6.8286	3.97743e-06	0.000153208	4.49384
tetur32g01910	Hypothetical protein	1.28266	15.8577	7.74544	8.21911e-07	5.45749e-05	6.06769
tetur20g00290	Cytochrome P450 - CYP392B3	1.27017	11.8023	12.5	1.08755e-09	1.01098e-06	12.5278
tetur16g03200	PREDICTED: similar to adenylate cyclase	1.26519	8.16212	7.4848	1.27218e-06	7.12423e-05	5.63241
tetur18g00530	Hypothetical protein	1.25755	11.1112	8.13379	4.3572e-07	3.84537e-05	6.69868
tetur03g04990	Cytochrome P450 - CYP392D2	1.24851	7.34252	6.50416	7.14087e-06	0.000224262	3.90815
tetur04g07770	UDP-glycosyltransferase, teturUGT18	1.24561	9.74772	10.3899	1.55311e-08	5.15634e-06	9.97717
tetur01g11260	PREDICTED: similar to lycopene cyclase / phytoene synthase	1.24448	9.59816	5.28159	7.36288e-05	0.00107845	1.57073
tetur01g04940	Hypothetical protein	1.21321	10.6966	9.21168	8.24907e-08	1.3375e-05	8.34405
tetur07g02710	dimethylaniline monooxygenase	1.21149	12.6719	6.40609	8.54681e-06	0.000247237	3.72817
tetur17g01700	GF11309	1.2111	12.8277	7.91849	6.17977e-07	4.70878e-05	6.35144
tetur07g05940	intradiol ring-cleavage dioxygenase	1.20951	10.2558	2.74553	0.0143304	0.0474976	-3.6191
tetur21g01170	dimethylaniline monooxygenase	1.20563	7.49675	4.01401	0.000995622	0.00659848	-1.02428
tetur16g00750	lysosomal alpha-mannosidase	1.19902	9.41886	6.27603	1.08695e-05	0.000288693	3.48737
tetur13g02960	Hypothetical protein	1.19028	9.4578	8.78872	1.55913e-07	2.09044e-05	7.71649
tetur40g00392	Trypsin Inhibitor-like, cysteine rich domain	1.18923	12.1776	8.17261	4.09371e-07	3.75544e-05	6.76061
tetur16g02900	Small Secreted Protein with 6 Cys residues	1.1851	8.70592	5.47594	5.01489e-05	0.00082661	1.95529
tetur08g07930	Cytochrome P450 pseudogene	1.17996	9.82433	5.02306	0.000123597	0.00152787	1.05249
tetur12g00700	Small Secreted Protein; Family F	1.17859	9.18774	5.82609	2.54144e-05	0.000536481	2.63628
tetur13g04550	Intradiol ring-cleavage dioxygenase, core	1.17799	8.29225	8.36418	3.01722e-07	3.18728e-05	7.06325
tetur04g07050	sorbitol dehydrogenase	1.17659	11.4248	4.87689	0.000166217	0.00187362	0.756401
tetur08g03910	Saccharopine dehydrogenase, NADP binding domain	1.1752	8.53361	6.76054	4.49162e-06	0.000164819	4.37221
tetur12g02260	Hypothetical protein	1.16868	9.28017	6.12572	1.43916e-05	0.000358992	3.20614
tetur01g10390	ABC-transporter; class C;	1.15875	9.7087	7.36027	1.57242e-06	8.06096e-05	5.42106
tetur13g00650	Secreted peptide of unknown function	1.15149	9.63829	11.5796	3.30708e-09	2.00495e-06	11.4695
tetur33g00860	Hypothetical protein	1.14419	6.72054	5.36656	6.22122e-05	0.000954331	1.73942
tetur243g00010	Hypothetical protein	1.13908	9.8553	9.43722	5.9236e-08	1.1162e-05	8.6695
tetur01g01710	Hypothetical protein	1.13563	14.323	6.87684	3.65049e-06	0.000142984	4.57963
tetur22g01620	Serine/threonine/dual specificity protein kinase, catalytic domain	1.12734	6.27992	7.82995	7.14717e-07	5.01242e-05	6.20678
tetur26g02760	Hypothetical protein	1.1193	11.4805	4.67858	0.000249366	0.00247485	0.351494
tetur07g00150	Serine protease	1.11762	14.5783	7.56475	1.11158e-06	6.62385e-05	5.76695
tetur09g00880	Hypothetical protein	1.1163	7.96426	6.62316	5.75185e-06	0.000192936	4.12472
tetur04g06770	Carboxyl/cholinesterase	1.11167	8.58331	7.6176	1.01718e-06	6.24825e-05	5.85539
tetur17g02910	phytanoyl-CoA dioxygenase domain-containing protein 1	1.11083	13.801	4.44537	0.000403748	0.0034624	-0.128606
tetur33g00340	Hypothetical protein	1.10707	12.4697	5.37832	6.07832e-05	0.000935497	1.76269
tetur01g11270	phytoene dehydrogenase	1.10486	11.1517	4.13287	0.000775463	0.00554396	-0.77684
tetur08g05470	chitinase	1.09868	7.35021	6.40376	8.58358e-06	0.000247292	3.72387
tetur447g00010	Hypothetical protein	1.08407	9.09561	5.32601	6.74131e-05	0.00100968	1.65903
tetur30g02090	PREDICTED: hypothetical protein	1.06665	7.01858	5.83768	2.4856e-05	0.000526735	2.65854
tetur07g01660	PREDICTED: hypothetical protein	1.05499	16.5611	9.0659	1.02491e-07	1.60577e-05	8.13032
tetur13g01200	Complement control module	1.04881	9.33014	7.22991	1.96725e-06	9.33037e-05	5.19745
tetur03g10103	Single Copy Small Secreted Protein of Unknown Function	1.0478	8.66585	13.2448	4.64094e-10	5.39277e-07	13.3285
tetur21g03330	n/a	1.03731	9.30658	12.1677	1.61205e-09	1.19861e-06	12.1548
tetur11g05440	Lipase/lipooxygenase; PLAT/LH2	1.03691	7.38062	7.3927	1.48772e-06	7.72432e-05	5.47631
tetur22g00680	Hypothetical protein	1.03566	12.5328	5.6903	3.30163e-05	0.000636487	2.37405
tetur15g00340	UDP-glycosyltransferase; teturUGT55	1.03443	7.39154	9.45072	5.80846e-08	1.1162e-05	8.68877
tetur28g01250	intradiol ring-cleavage dioxygenase	1.03087	12.5936	4.33418	0.000508875	0.00410397	-0.358745
tetur14g00100	Hypothetical protein	1.0261	7.63768	12.1933	1.56352e-09	1.19861e-06	12.1838
tetur14g00160	Hypothetical protein	1.02488	8.28091	6.99172	2.97981e-06	0.000124031	4.78261
tetur08g06370	sialin	1.01912	7.97167	4.11972	0.000797167	0.00565109	-0.804195
tetur11g05410	PREDICTED: similar to adenylate cyclase	1.01596	7.82528	8.15642	4.20149e-07	3.77971e-05	6.73481
tetur38g00090	Granulin	1.0147	12.0392	9.88787	3.10775e-08	8.00975e-06	9.30127
tetur27g00220	Cytochrome P450 probable pseudogene	1.005	10.8413	5.66915	3.43971e-05	0.000654344	2.333
tetur01g03490	endonuclease-chitinase multifunctional protein	1.00091	12.1054	4.73608	0.000221601	0.00228516	0.46926
tetur07g05480	vitellogenin fused with superoxide dismutase	0.999127	9.84844	9.05545	1.04109e-07	1.61299e-05	8.11489
tetur18g01310	Hypothetical protein	0.995285	14.2768	8.13554	4.34499e-07	3.84537e-05	6.70147
tetur16g02380	Carboxyl/cholinesterase	0.990225	13.6131	3.7777	0.00163933	0.00943018	-1.51648
tetur38g00060	Chitin binding protein; peritrophin-A	0.990178	11.3591	3.28145	0.004681	0.0204294	-2.54334
tetur29g01360	Low Complexity Secreted Protein	0.989478	17.0144	7.58078	1.08201e-06	6.53139e-05	5.79382
tetur05g04060	secreted salivary gland peptide; putative	0.98893	8.67076	9.87618	3.15933e-08	8.00975e-06	9.28519
tetur01g02850	Zinc finger; RING-type	0.988565	8.36075	8.13962	4.31652e-07	3.84537e-05	6.70799
tetur03g04330	PREDICTED: similar to F55A4.8a	0.984814	10.0821	5.77693	2.79323e-05	0.000575263	2.54161
tetur30g02040	phospholipid scramblase 1	0.982071	7.94181	4.18862	0.000689891	0.00510336	-0.660909
tetur05g05080	solute carrier organic anion transporter; putative	0.981221	11.5727	6.46464	7.67603e-06	0.000232961	3.83579
tetur04g01060	Fatty acyl-CoA reductase	0.979479	7.85936	5.04025	0.000119384	0.00149165	1.08717
tetur03g08800	Small secreted protein; family B	0.975567	15.0637	8.76558	1.61537e-07	2.14521e-05	7.68149
tetur143g00020	Small Secretory Protein; Family F	0.975022	9.42699	6.02069	1.75422e-05	0.00041671	3.00777
tetur02g15167	Serine proteases, trypsin family, histidine active site	0.97279	6.96311	3.53577	0.0027349	0.0137723	-2.01908
tetur12g02110	conserved unknown protein	0.972582	8.78514	7.49744	1.24526e-06	7.12423e-05	5.65374
tetur29g01670	isoamyl acetate-hydrolyzing esterase 1 homolog	0.971325	11.3035	7.40725	1.45128e-06	7.63647e-05	5.50105
tetur08g91656	hypothetical protein	0.970209	6.54042	6.45115	7.8681e-06	0.00023645	3.81104
tetur03g07520	Protein-tyrosine phosphatase; receptor/non-receptor type	0.969994	9.59458	5.4418	5.36299e-05	0.000859557	1.88808
tetur06g04210	CCAAT/enhancer binding protein alpha	0.965776	8.77842	6.85649	3.78484e-06	0.000147008	4.54348
tetur04g09240	Low-density lipoprotein (LDL) receptor class A repeat	0.962978	8.71845	8.47757	2.52405e-07	2.74964e-05	7.24006
tetur13g00600	Hypothetical protein	0.958896	10.7092	8.54502	2.27154e-07	2.61771e-05	7.34441
tetur16g03190	Serine protease homologue	0.951745	9.4095	2.94022	0.00957586	0.0350002	-3.23441
tetur31g01320	GNS1/SUR4 membrane protein	0.947861	9.08166	4.97813	0.000135347	0.00162756	0.961704
tetur01g14770	myo-inositol 2-dehydrogenase	0.935355	14.4238	5.31194	6.93213e-05	0.00103271	1.63108
tetur17g03540	Hypothetical protein	0.922647	8.93286	2.81161	0.0125048	0.0429052	-3.48949
tetur21g02980	Hypothetical protein	0.918187	8.41209	6.74216	4.64202e-06	0.00016769	4.33926
tetur03g09640	Hypothetical protein	0.911857	13.9795	7.23558	1.94808e-06	9.30277e-05	5.20723
tetur28g01720	short-chain dehydrogenase/reductase SDR	0.904721	10.5286	4.68724	0.000244963	0.00244858	0.369263
tetur06g04550	Hypothetical protein	0.904056	12.1888	7.93984	5.96774e-07	4.62301e-05	6.38616
tetur01g13010	Hypothetical protein	0.901678	7.60197	7.73018	8.42993e-07	5.49057e-05	6.04247
tetur29g00370	Hypothetical protein	0.901515	12.9131	7.41601	1.42979e-06	7.63647e-05	5.51594
tetur01g01510	Apolipoprotein D precursor; putative	0.900113	12.128	3.83696	0.00144635	0.00859671	-1.39308
tetur30g01000	PaXiLlin homolo family member	0.899897	9.68624	5.95812	1.9752e-05	0.000450296	2.88888
tetur14g00150	Proteinase/amylase inhibitor domain	0.895853	8.21765	7.7648	7.95954e-07	5.33596e-05	6.09963
tetur08g01900	Crustacean Hyperglycemic Hormone Homolog	0.894048	8.16674	6.1144	1.47008e-05	0.000364099	3.18484
tetur01g12600	Hypothetical protein	0.892356	9.75486	9.57882	4.82548e-08	9.75166e-06	8.87063
tetur10g04430	Serine protease	0.89153	11.6283	7.73728	8.33111e-07	5.49057e-05	6.05421
tetur17g00770	Leucine-rich repeat domain, L domain-like	0.881053	8.77125	4.94568	0.000144544	0.00170086	0.895994
tetur27g00280	Cytochrome P450 -	0.880059	10.4643	5.00204	0.000128959	0.00158014	1.01004
tetur49g00080	Armadillo-type fold	0.878031	12.0157	5.3181	6.84795e-05	0.00102285	1.64332
tetur07g00700	Leucine-rich repeat domain, L domain-like	0.877839	7.65938	4.22932	0.000633515	0.00480616	-0.576326
tetur22g02700	Insect antifreeze protein	0.872668	6.52948	6.67786	5.21086e-06	0.000182106	4.22358
tetur02g00240	RecName: Full	0.869046	7.51945	9.54595	5.05976e-08	1.00514e-05	8.82415
tetur05g00070	UDP-glycosyltransferase; teturUGT21	0.867735	9.1885	5.50798	4.70937e-05	0.000795005	2.01825
tetur10g02150	Immunoglobulin E-set	0.867013	8.19455	8.08986	4.677e-07	3.95249e-05	6.62835
tetur11g05550	PREDICTED: similar to ENSANGP00000027535	0.860778	7.33859	4.74578	0.000217241	0.00225892	0.489093
tetur05g04420	choline/ethanolaminephosphotransferase 1	0.859826	10.7785	4.86189	0.000171371	0.00191168	0.725897
tetur08g06160	Cytochrome P450 - CYP387A1-p1 pseudogene	0.858582	10.9689	6.04411	1.67826e-05	0.000405575	3.05213
tetur04g07030	sorbitol dehydrogenase	0.85809	10.723	4.88833	0.000162393	0.00184098	0.779651
tetur01g13370	Hypothetical protein	0.857045	11.0395	7.31723	1.69269e-06	8.42962e-05	5.34751
tetur04g00730	Hypothetical protein	0.853963	11.7197	6.79936	4.19043e-06	0.000159783	4.44166
tetur05g04970	nematoblast-specific protein	0.852757	11.9111	8.49006	2.47515e-07	2.74964e-05	7.25944
tetur21g02620	Hypothetical protein	0.847653	13.2186	5.95442	1.98913e-05	0.00045247	2.88183
tetur04g00870	Hypothetical protein	0.846516	8.19038	5.2049	8.57864e-05	0.0011986	1.41777
tetur19g00860	Nose resistant-to-fluoxetine protein, N-terminal	0.843681	9.76996	6.40571	8.55286e-06	0.000247237	3.72746
tetur02g08420	Hypothetical protein	0.842967	8.86059	4.43879	0.000409305	0.00350144	-0.142209
tetur08g04450	secreted salivary gland peptide; putative	0.841244	10.3332	3.35718	0.0039896	0.018109	-2.38785
tetur17g00410	Carboxyl/cholinesterase	0.839982	7.89135	7.41969	1.42087e-06	7.62021e-05	5.52218
tetur01g11180	Leucine-rich repeat domain, L domain-like	0.837586	9.28461	5.53634	4.45502e-05	0.000766307	2.07387
tetur09g03190	Hypothetical protein	0.830497	11.7945	7.44054	1.37136e-06	7.49891e-05	5.55755
tetur16g03330	Serine protease homologue	0.829731	9.51214	3.36486	0.00392538	0.0178816	-2.37204
tetur04g07830	Hypothetical protein	0.82963	8.53639	9.70612	4.0206e-08	9.11954e-06	9.04939
tetur16g03500	Cytochrome P450 - CYP392A7	0.828629	9.93612	5.8384	2.48218e-05	0.000526735	2.65992
tetur04g04290	Polycystin cation channel, PKD1/PKD2	0.828578	9.00419	6.43527	8.10071e-06	0.00024136	3.78186
tetur42g00180	Zinc finger, CCHC-type	0.828316	7.89443	6.22518	1.1948e-05	0.00031257	3.39258
tetur16g02410	Carboxyl/cholinesterase	0.826013	10.2716	3.62352	0.00227141	0.0119745	-1.83707
tetur20g01160	intradiol ring-cleavage dioxygenase	0.82547	7.36633	3.91645	0.00122292	0.00763312	-1.22751
tetur02g12070	transcription factor SOX-2	0.824018	9.81299	5.55966	4.25653e-05	0.000745641	2.11953
tetur15g02030	conserved hypothetical protein	0.823783	7.5358	6.43406	8.1188e-06	0.000241383	3.77963
tetur02g06270	Tetratricopeptide-like helical	0.823591	10.2683	6.49897	7.20894e-06	0.000225384	3.89865
tetur14g00080	Hypothetical protein	0.823402	7.85671	6.68359	5.15729e-06	0.000182059	4.23392
tetur20g00710	Hypothetical protein	0.822948	9.0546	3.69495	0.00195285	0.0107376	-1.68866
tetur36g01110	Glycine-rich secreted protein	0.819003	11.6031	8.01014	5.32175e-07	4.24037e-05	6.50004
tetur13g00610	Hypothetical protein	0.81703	8.37556	9.96593	2.78533e-08	7.76773e-06	9.40825
tetur30g01740	PREDICTED: hypothetical protein	0.816602	11.1058	3.63784	0.00220364	0.0117058	-1.80734
tetur21g00940	P-loop containing nucleoside triphosphate hydrolase	0.81627	8.08232	7.59139	1.0629e-06	6.47209e-05	5.81158
tetur01g16320	Peptidase S1, trypsin family, active site	0.812971	12.2535	5.79488	2.6984e-05	0.000564115	2.57622
tetur06g04520	Cytochrome P450 - CYP392A16	0.81249	10.9711	9.28891	7.36008e-08	1.28549e-05	8.45619
tetur02g12650	MIF4G-like, type 3	0.812418	8.91887	5.59216	3.99504e-05	0.000717599	2.18305
tetur03g09800	ABC-transporter; class C;	0.812219	12.0094	5.38683	5.97699e-05	0.000923982	1.77952
tetur22g02180	Lipase/lipooxygenase; PLAT/LH2	0.811154	8.78172	4.6038	0.000290874	0.0027498	0.197971
tetur18g01440	Peptidase M16; core	0.811125	9.46268	5.33273	6.65219e-05	0.00100279	1.67235
tetur18g03640	S-adenosyl-L-methionine-dependent methyltransferase	0.810513	8.53965	9.99134	2.68811e-08	7.6496e-06	9.44293
tetur06g05320	Hypothetical protein	0.806155	11.0425	3.78579	0.00161152	0.0093335	-1.49964
tetur26g02801	Glutathione S-transferase, C-terminal	0.805042	9.84873	4.93622	0.000147343	0.00172392	0.876828
tetur02g11780	Hypothetical protein	0.804815	8.26556	7.15999	2.22048e-06	0.000100855	5.07652
tetur30g00800	Chitin-binding protein, N-terminal	0.80426	10.6757	11.2612	4.93996e-09	2.29609e-06	11.0845
tetur40g00391	Trypsin Inhibitor-like, cysteine rich domain	0.801167	12.6284	7.0119	2.87594e-06	0.000120789	4.81807
tetur08g03050	Secreted Protein of Unknown Function; putative	0.799944	12.2252	6.93926	3.2685e-06	0.000132488	4.69016
tetur19g03300	stearoyl-CoA desaturase	0.799611	10.7323	5.54747	4.35911e-05	0.000756012	2.09568
tetur02g11830	Hypothetical protein	0.798372	7.58705	6.76884	4.42536e-06	0.000163846	4.38708
tetur06g00950	cysteine and glycine-rich protein 3	0.796915	12.3476	5.25741	7.7257e-05	0.001114	1.52258
tetur18g01950	Hypothetical protein	0.794742	7.00338	3.92255	0.00120727	0.0075659	-1.21479
tetur05g03470	Hypothetical protein	0.794684	6.88025	14.0036	2.02926e-10	2.8296e-07	14.0975
tetur16g01410	Hypothetical protein	0.793647	7.78643	6.36472	9.22376e-06	0.000260356	3.65182
tetur29g01060	Alpha-hydroxy acid dehydrogenase; FMN-dependent	0.792905	12.6136	6.35355	9.41591e-06	0.000263646	3.63117
tetur32g01960	Carbonyl reductase [NADPH] 1	0.790139	9.59714	3.76867	0.00167091	0.00956276	-1.53527
tetur03g05520	Alkaline phosphatase-like, alpha/beta/alpha	0.788137	8.10287	5.944	2.02895e-05	0.000457794	2.86197
tetur01g04020	Fibroin	0.788055	12.5283	4.81684	0.00018786	0.00204144	0.634152
tetur01g01500	Apolipoprotein D precursor; putative	0.785321	9.34004	5.31779	6.85212e-05	0.00102285	1.64271
tetur08g03930	RhoGAP	0.783767	8.7458	7.39998	1.46937e-06	7.67377e-05	5.48869
tetur06g00930	Neuropeptide Precursor.	0.7807	8.95883	9.26254	7.6517e-08	1.28549e-05	8.41799
tetur31g01110	Glycoside hydrolase; subgroup; catalytic core	0.780178	13.256	7.37604	1.53061e-06	7.90475e-05	5.44795
tetur28g02550	Immunoglobulin E-set	0.778397	7.32657	4.68133	0.000247957	0.00246789	0.357146
tetur01g13280	Small Secreted Protein; family A	0.775997	15.3277	6.27215	1.0948e-05	0.0002902	3.48016
tetur09g00900	Hypothetical protein	0.773645	9.8196	7.7077	8.75105e-07	5.62326e-05	6.00525
tetur10g05570	Hypothetical protein	0.767846	8.63112	7.07236	2.58679e-06	0.000112019	4.92397
tetur10g00100	Hypothetical protein	0.766637	13.0926	4.40032	0.000443385	0.00371772	-0.221775
tetur11g00550	GG23423	0.766275	11.1923	3.13288	0.00639953	0.0260692	-2.84641
tetur21g00410	sodium-dependent glucose transporter 1	0.764522	8.77574	6.28281	1.07334e-05	0.000285622	3.49999
tetur10g01970	PREDICTED: similar to solute carrier family 25	0.763478	10.1625	6.3848	8.88848e-06	0.000253458	3.68891
tetur10g05520	Hypothetical protein	0.762259	7.9827	10.7843	9.16581e-09	3.36337e-06	10.4884
tetur32g01250	UDP-glycosyltransferase; teturUGT75	0.762191	10.6102	6.11972	1.45548e-05	0.000361125	3.19484
tetur12g00140	Fibroin	0.761579	11.8505	5.27591	7.44646e-05	0.00108954	1.55943
tetur36g00580	cys-loop ligand-gated ion channel; Rdl-homolog	0.761471	7.75073	4.85886	0.000172435	0.00192201	0.719715
tetur09g00070	Hypothetical protein	0.760822	9.92476	8.53762	2.29787e-07	2.61978e-05	7.33301
tetur25g01890	Hypothetical protein	0.760789	8.43853	5.70785	3.19141e-05	0.000622392	2.40807
tetur29g00220	Glutathione S-transferase; class delta	0.754714	10.2014	4.30094	0.000545421	0.004317	-0.427657
tetur05g04590	PREDICTED: similar to sodium-dependent phosphate transporter	0.753434	6.77909	7.79293	7.59751e-07	5.20362e-05	6.14597
tetur19g01760	CD63 antigen	0.748327	10.9763	6.08676	1.54855e-05	0.000380829	3.13273
tetur25g02050	Cytochrome P450 - CYP389A1	0.747066	10.2253	2.8783	0.0108916	0.0386344	-3.35767
tetur04g05380	elongation of very long chain fatty acids protein 1	0.746501	6.77616	8.00611	5.35674e-07	4.244e-05	6.49353
tetur238g00010	Fibroin	0.744537	13.2039	4.03967	0.000943277	0.00637569	-0.970849
tetur04g00720	Hypothetical protein	0.743861	9.81939	6.07476	1.58394e-05	0.000388163	3.11009
tetur05g08190	Hypothetical protein	0.742027	7.48552	6.62613	5.72104e-06	0.000192691	4.13009
tetur02g08250	PREDICTED: high-mobility group box 2	0.741528	6.96047	3.80526	0.00154657	0.00906486	-1.45911
tetur08g06350	sialin; putative	0.74125	7.71102	7.45661	1.33445e-06	7.35478e-05	5.58476
tetur10g05590	HNTX-XIV-3.2 precursor	0.74092	9.60524	9.62591	4.50958e-08	9.52751e-06	8.93698
tetur31g01040	Immunodominant surface protein, Ehrlichia tandem repeat-containing	0.740701	15.9386	4.76512	0.000208809	0.00220155	0.528605
tetur39g00610	Hypothetical protein	0.737106	7.71109	3.44007	0.00334849	0.0160345	-2.217
tetur04g01230	hypothetical protein IscW_ISCW013795	0.733725	11.0686	4.13273	0.000775693	0.00554396	-0.777134
tetur07g06780	Hypothetical protein	0.733529	8.13248	5.64058	3.63581e-05	0.000678684	2.27745
tetur14g00070	Hypothetical protein	0.73143	10.75	6.04118	1.68756e-05	0.000406412	3.04659
tetur04g06260	secreted salivary gland peptide; putative	0.730037	8.98203	4.53809	0.000333159	0.0030284	0.0627276
tetur19g02360	Neuropeptide precursor.	0.729267	8.18409	8.12584	4.41335e-07	3.84624e-05	6.68597
tetur04g02350	UDP-glycosyltransferase; teturUGT13	0.729187	9.69078	3.82536	0.00148224	0.00875775	-1.41724
tetur03g08820	Small secreted protein; family B	0.728759	12.1864	5.14862	9.60106e-05	0.00129225	1.30511
tetur01g11220	amino acid transporter	0.728591	7.46604	5.27471	7.46425e-05	0.001091	1.55705
tetur26g01860	CTF transcription factor/nuclear factor 1, N-terminal	0.728058	10.6893	4.75355	0.000213812	0.0022366	0.504972
tetur21g01840	Complex 1 LYR protein	0.725218	10.0642	9.41491	6.11939e-08	1.13772e-05	8.63757
tetur27g01640	Hypothetical protein	0.724241	7.35562	6.33301	9.78021e-06	0.000268455	3.59315
tetur09g01920	Hypothetical protein	0.720953	7.54616	6.34624	9.54393e-06	0.000264963	3.61764
tetur13g01570	Hypothetical protein	0.719262	10.2324	5.71721	3.13419e-05	0.000615775	2.4262
tetur04g05770	sorbitol dehydrogenase	0.718542	14.4773	3.50982	0.00288925	0.014322	-2.07282
tetur24g01310	Carboxyl/cholinesterase	0.715909	10.6032	4.22558	0.000638501	0.0048227	-0.584106
tetur09g05040	Hypothetical protein	0.71582	9.40121	5.11128	0.00010348	0.00136131	1.23015
tetur02g00130	isoamyl acetate-hydrolyzing esterase 1	0.713776	11.9068	7.92775	6.0869e-07	4.6635e-05	6.3665
tetur06g00520	Hypothetical protein	0.712334	13.7059	7.06497	2.62046e-06	0.000112777	4.91105
tetur09g00930	Hypothetical protein	0.711688	8.08498	9.78608	3.58843e-08	8.48085e-06	9.16067
tetur07g04340	Hypothetical protein	0.711509	6.94253	8.79905	1.53469e-07	2.07765e-05	7.73209
tetur533g00010	PREDICTED: similar to sodium-dependent phosphate transporter	0.710138	6.95567	3.85422	0.0013946	0.00837479	-1.35715
tetur28g01890	Hypothetical protein	0.708626	7.03225	5.16194	9.34827e-05	0.00126802	1.3318
tetur05g08680	Hypothetical protein	0.707347	10.8954	6.71091	4.90988e-06	0.000175098	4.28312
tetur30g02489	Acyl-CoA N-acyltransferase	0.706005	9.00628	9.28421	7.4112e-08	1.28549e-05	8.44939
tetur26g02050	PREDICTED: similar to AGAP005556-PA	0.705711	8.53788	4.70483	0.000236273	0.00238917	0.405295
tetur01g06680	hypothetical protein BRAFLDRAFT_118224	0.705561	7.06897	4.92231	0.000151559	0.0017589	0.848634
tetur19g02590	PREDICTED: similar to conserved hypothetical protein	0.703849	6.9717	7.90596	6.3079e-07	4.75445e-05	6.33103
tetur02g00920	Hypothetical protein	0.703291	10.0129	4.54391	0.000329172	0.00300195	0.0747179
tetur14g02400	Hypothetical protein	0.702785	11.9461	5.41321	5.67375e-05	0.000892943	1.83166
tetur05g02820	Hypothetical protein	0.700927	8.34187	4.37887	0.000463625	0.00385497	-0.266167
tetur08g06120	Hypothetical protein	0.699374	11.2994	9.68441	4.14722e-08	9.17917e-06	9.01903
tetur15g02120	ras-related protein Rab-23	0.697998	8.5563	8.06132	4.89789e-07	4.04119e-05	6.58251
tetur16g01170	Hypothetical protein	0.694502	11.9452	4.5094	0.000353543	0.00315722	0.00358021
tetur16g02330	Domain of unknown function DUF2236	0.693624	9.97122	4.56779	0.000313317	0.00290099	0.123901
tetur05g01630	aminopeptidase N	0.693417	8.10921	3.61088	0.00233299	0.0122298	-1.86331
tetur24g00890	kelch-like 18	0.690284	8.0156	4.07057	0.000883913	0.00607025	-0.906507
tetur14g00110	Hypothetical protein	0.687215	8.45186	6.78091	4.33086e-06	0.000163149	4.40868
tetur15g01870	Hypothetical protein	0.685745	8.70135	6.67862	5.2037e-06	0.000182106	4.22496
tetur623g00010	PREDICTED: similar to adenylate cyclase	0.685431	7.35563	5.63395	3.68293e-05	0.000683819	2.26455
tetur01g03800	Low-density lipoprotein (LDL) receptor class A, conserved site	0.682078	8.9911	7.40918	1.44651e-06	7.63647e-05	5.50433
tetur31g00630	Armadillo-type fold	0.680714	14.0691	3.69365	0.00195823	0.010746	-1.69136
tetur17g00350	Carboxyl/cholinesterase	0.676658	9.46534	4.61103	0.000286569	0.00272201	0.212836
tetur08g06570	acyl-CoA delta-9 desaturase	0.675931	10.4062	7.10484	2.44419e-06	0.000108541	4.98063
tetur36g00640	putative peptidylglycine alpha-hydroxylating monooxygenase	0.67551	8.98663	6.12914	1.42996e-05	0.000357337	3.21257
tetur14g04020	Peptidase S1A, chymotrypsin-type	0.674844	10.0501	5.09929	0.000106004	0.00138013	1.20605
tetur22g00250	Protease inhibitor I8; cysteine-rich trypsin inhibitor-like	0.67325	10.7114	4.40245	0.000441422	0.00370572	-0.217362
tetur12g03620	cys-loop ligand-gated ion channel; Rdl-homolog	0.672718	7.74636	5.68996	3.30382e-05	0.000636487	2.37339
tetur05g09140	Serine protease homologue	0.672283	7.81306	6.76532	4.45337e-06	0.000163846	4.38077
tetur04g02050	hypothetical protein IscW_ISCW020080	0.670333	8.8845	4.74731	0.00021656	0.00225689	0.492224
tetur24g00510	Hypothetical protein	0.667251	7.46243	9.83145	3.36519e-08	8.37931e-06	9.22348
tetur05g07820	synaptotagmin-1	0.666991	11.9505	6.34436	9.57699e-06	0.000264963	3.61418
tetur03g02740	PREDICTED: similar to adenylate cyclase	0.666898	11.7703	3.81297	0.00152157	0.00893716	-1.44306
tetur25g00650	Cathepsin L	0.66223	16.1458	3.08073	0.0071394	0.0282417	-2.95204
tetur09g00820	hypothetical protein	0.661198	8.64908	5.89299	2.23607e-05	0.000489919	2.76456
tetur05g07070	lipoprotein Blc	0.659924	14.3973	4.88895	0.000162191	0.00184044	0.780896
tetur11g02070	tribbles homolog 2	0.6599	11.4296	6.79498	4.22333e-06	0.000160027	4.43383
tetur14g03800	PREDICTED: similar to PMP1 protein	0.655825	8.72863	5.5372	4.4475e-05	0.000766307	2.07556
tetur16g00250	scaffold protein	0.654366	11.8781	7.73245	8.3983e-07	5.49057e-05	6.04622
tetur07g06480	Cytochrome P450 - CYP392A4	0.653208	8.63477	4.74479	0.000217682	0.00226182	0.487066
tetur17g03500	Tetraspanin/Peripherin	0.652739	8.37007	4.65331	0.000262667	0.00255953	0.299666
tetur22g00820	Mandelate racemase/muconate lactonizing protein	0.650708	13.3684	5.52197	4.58206e-05	0.000780126	2.04571
tetur453g00010	neuromedin-K receptor	0.650257	6.90329	8.48236	2.50517e-07	2.74964e-05	7.2475
tetur09g01000	Hypothetical protein	0.647225	9.13831	7.1803	2.14362e-06	9.80402e-05	5.11171
tetur31g01060	Armadillo-type fold	0.646314	14.6952	4.07105	0.000883018	0.00606922	-0.905503
tetur10g03730	Tob1 homolog [Tetranychus urticae]	0.64603	11.9639	5.55154	4.32459e-05	0.000753775	2.10364
tetur12g01180	exosome complex exonuclease Rrp41	0.645922	10.3995	7.78871	7.65069e-07	5.20362e-05	6.13903
tetur27g02598	Cytochrome P450, E-class, group I	0.644923	8.60639	5.09127	0.000107727	0.00139475	1.18993
tetur17g01620	CD63 antigen	0.643438	8.02499	5.82575	2.54313e-05	0.000536481	2.63561
tetur09g02890	Mitochodrial transcription termination factor	0.642699	10.9034	7.98853	5.51219e-07	4.34248e-05	6.4651
tetur06g00870	Neuropeptide precursor	0.642512	8.90863	6.51746	6.96971e-06	0.000220876	3.93245
tetur01g02990	Serine protease; polyserase	0.642424	11.4193	7.78581	7.6875e-07	5.20362e-05	6.13425
tetur05g05250	Glutathione S-transferase; class mu	0.641522	10.189	4.31301	0.00053185	0.00423053	-0.402625
tetur10g05620	Prokineticin	0.640004	11.578	6.74242	4.63986e-06	0.00016769	4.33973
tetur07g02970	prestin	0.639132	10.6153	3.7438	0.00176113	0.00996639	-1.58703
tetur03g10033	n/a	0.638526	7.67785	7.00648	2.90347e-06	0.00012158	4.80855
tetur06g01640	outer membrane lipoprotein Blc	0.63842	15.0058	5.49923	4.79084e-05	0.000803892	2.00107
tetur04g03740	Tetratricopeptide-like helical	0.637006	9.09358	6.50504	7.1294e-06	0.000224262	3.90976
tetur02g03490	PLAT single domain protein	0.636549	10.5814	6.47934	7.47229e-06	0.000229941	3.86273
tetur09g03810	Neuropeptide precursor	0.63624	7.33812	7.49286	1.25495e-06	7.12423e-05	5.64601
tetur02g03310	PREDICTED: zinc finger protein 474-like	0.636039	11.1983	5.79236	2.71154e-05	0.000566013	2.57136
tetur22g01390	Hypothetical protein	0.635399	8.82388	9.43914	5.90711e-08	1.1162e-05	8.67223
tetur11g01970	Bromodomain	0.635331	8.30471	4.94295	0.000145344	0.0017074	0.890476
tetur07g01320	phosphatidylcholine-sterol acyltransferase	0.63191	10.9737	5.59695	3.95793e-05	0.000715816	2.1924
tetur04g00620	Hypothetical protein	0.630974	9.50535	4.90777	0.000156102	0.00180041	0.819121
tetur01g01800	PREDICTED: similar to miple CG1221-PA; isoform A isoform 1	0.629865	11.8844	7.00417	2.91525e-06	0.000121707	4.8045
tetur11g00700	tribbles homolog 2	0.628607	11.5639	5.8437	2.45712e-05	0.000522287	2.67009
tetur02g08580	phosphoenolpyruvate synthase	0.627662	10.2311	5.72385	3.09423e-05	0.000612	2.43906
tetur16g02260	KOG3882-like protein	0.627199	13.0817	4.62915	0.000276065	0.00265113	0.250064
tetur30g01200	Neuropeptide precursor.	0.627191	10.3587	5.5631	4.22801e-05	0.000743447	2.12627
tetur18g00480	Hypothetical protein	0.626372	13.112	10.0048	2.63802e-08	7.6496e-06	9.46128
tetur35g01676	Neuropeptide precursor	0.621923	8.82713	5.60447	3.90033e-05	0.000712795	2.20708
tetur06g01570	Glycoside hydrolase; subgroup; catalytic core	0.621768	8.16446	4.54942	0.000325445	0.00297965	0.0860638
tetur10g00310	Legumain	0.621454	12.4107	3.98754	0.00105269	0.00685438	-1.07941
tetur01g03530	ABC-transporter; class H	0.621221	8.72357	6.02904	1.72672e-05	0.00041158	3.0236
tetur28g02570	Leucine-rich repeat domain, L domain-like	0.620014	8.54111	8.20853	3.86474e-07	3.64121e-05	6.81773
tetur23g01450	Hypothetical protein	0.619099	8.75595	6.53324	6.77201e-06	0.000217662	3.96126
tetur10g01570	cysteine synthase A	0.618385	12.3941	7.44113	1.37e-06	7.49891e-05	5.55854
tetur01g92860	hypothetical protein	0.617413	7.84938	8.4855	2.49289e-07	2.74964e-05	7.25236
tetur20g03230	Hypothetical protein	0.617233	12.9389	4.86505	0.000170271	0.00190398	0.732326
tetur20g02800	Plant self-incompatibility S1	0.61679	9.53032	5.56007	4.2531e-05	0.000745641	2.12034
tetur22g01410	hypothetical protein	0.61636	11.1324	5.10784	0.000104197	0.0013668	1.22325
tetur01g08690	deoxyribonuclease II	0.616209	7.45043	4.82862	0.000183396	0.00201044	0.658164
tetur11g05160	Chitin binding domain	0.614516	11.5564	5.86331	2.36654e-05	0.000509245	2.70773
tetur04g02320	PREDICTED: similar to sodium-dependent phosphate transporter	0.614348	9.79492	3.14789	0.00620085	0.0253711	-2.81591
tetur03g09941	Cytochrome P450, conserved site	0.614344	6.90044	5.43257	5.46141e-05	0.000869337	1.86986
tetur35g01090	Sodium/calcium exchanger membrane region	0.613524	10.0373	8.01312	5.29611e-07	4.24037e-05	6.50484
tetur07g05780	Scramblase	0.612929	8.07908	3.74004	0.00177518	0.0100256	-1.59486
tetur21g03000	Hypothetical protein	0.612623	6.83587	8.07027	4.82748e-07	4.00681e-05	6.59689
tetur03g01630	Homeobox, conserved site	0.61106	7.57136	6.43562	8.0955e-06	0.00024136	3.7825
tetur27g00260	alpha-tocopherol transfer protein-like	0.610686	9.7639	2.85337	0.0114694	0.0402439	-3.40706
tetur04g92780	hypothetical protein	0.61058	7.44419	7.39175	1.49013e-06	7.72432e-05	5.47469
tetur28g01690	mitochondrial carnitine/acylcarnitine carrier protein CACL	0.608016	9.77504	3.84381	0.00142558	0.0085059	-1.37882
tetur04g00130	alpha-N-acetylgalactosaminidase	0.60743	13.2727	6.30524	1.0296e-05	0.000276717	3.54166
tetur02g05970	Glycosyl transferase; family 31	0.604895	8.29239	6.45244	7.8496e-06	0.000236403	3.81339
tetur14g01060	Hypothetical protein	0.6036	6.58805	6.91282	3.42494e-06	0.000136841	4.64341
tetur19g03391	Na+ channel, amiloride-sensitive	0.603374	7.99318	5.1256	0.000100548	0.00133655	1.25891
tetur02g07230	Glycoside hydrolase; subgroup; catalytic core	0.602659	9.81255	3.73737	0.00178524	0.0100457	-1.60041
tetur01g05160	Hypothetical protein	0.601172	8.84924	6.57783	6.24449e-06	0.000208309	4.04245
tetur36g00680	PREDICTED: similar to quiescin Q6-like 1	0.599726	11.0107	8.75583	1.63969e-07	2.14904e-05	7.66672
tetur26g01790	nucleoside diphosphate-linked moiety X motif 19; mitochondrial precursor	0.597579	8.63016	4.79291	0.00019727	0.00212259	0.585348
tetur02g05340	lipase 1 precursor	0.597282	7.90925	5.87405	2.31844e-05	0.000502387	2.72831
tetur01g11240	amino acid transporter	0.595664	9.86352	3.70607	0.00190744	0.0105545	-1.66553
tetur31g00450	Hypothetical protein	0.595399	7.09155	5.6106	3.8541e-05	0.000707127	2.21903
tetur14g03960	PREDICTED: hypothetical protein; partial	0.594507	10.4612	4.67273	0.000252382	0.0024906	0.339504
tetur13g00490	beta-lactamase-like protein 2	0.59365	10.4137	7.1294	2.34179e-06	0.000105676	5.02339
tetur24g00770	BTB/POZ-like	0.592435	8.22201	6.7532	4.55102e-06	0.000166124	4.35907
tetur15g00620	Nucleic acid-binding, OB-fold	0.592318	7.33708	6.57253	6.30489e-06	0.000209753	4.03281
tetur13g00740	Hypothetical protein	0.592259	8.8581	8.12972	4.38587e-07	3.84624e-05	6.69217
tetur33g00840	Hypothetical protein	0.592111	6.82896	11.0183	6.75082e-09	2.94167e-06	10.7838
tetur20g00560	Hypothetical protein	0.59058	12.3116	3.87528	0.00133393	0.00814372	-1.31327
tetur33g00590	leucine-rich repeat-containing protein 58	0.590364	11.2412	3.4729	0.00312391	0.0152041	-2.14918
tetur11g01940	lipase 1 precursor	0.590104	9.08419	8.28231	3.43554e-07	3.32675e-05	6.93452
tetur01g03280	28S ribosomal protein S18b; mitochondrial precursor	0.589743	11.7014	8.98542	1.15662e-07	1.75303e-05	8.01117
tetur08g06340	sialin	0.589491	8.60598	2.73322	0.014698	0.0483757	-3.64314
tetur20g01920	Chaperonin Cpn60	0.589197	14.6384	7.29861	1.74771e-06	8.64185e-05	5.31559
tetur03g05190	Cytochrome P450 - CYP388A1	0.58716	8.16864	2.79351	0.0129811	0.0441719	-3.52509
tetur23g01050	lipase 1 precursor	0.586848	11.8775	2.89557	0.0105078	0.0375685	-3.32337
tetur14g01740	Dynein light chain 1; cytoplasmic	0.585018	9.22851	4.64779	0.000265665	0.0025779	0.28835
tetur21g01340	hypothetical protein Bbu156a_O16	-0.585079	12.5176	-6.77549	4.37302e-06	0.000163478	4.39899
tetur01g09250	Hypothetical protein	-0.585579	9.3671	-5.41028	5.70661e-05	0.000896092	1.82588
tetur12g04270	Hypothetical protein	-0.585648	10.3119	-4.75753	0.000212076	0.00222345	0.513106
tetur23g00600	Hypothetical protein	-0.586882	7.40181	-6.67837	5.20607e-06	0.000182106	4.2245
tetur06g06170	Hypothetical protein	-0.587113	6.9402	-6.37432	9.06177e-06	0.000256303	3.66957
tetur18g03040	Hypothetical protein	-0.587647	8.14516	-2.96932	0.00901241	0.0333694	-3.17624
tetur22g02580	Hypothetical protein	-0.588058	10.5147	-4.32765	0.000515855	0.00414826	-0.372282
tetur04g07470	fucosyltransferase; putative	-0.58894	10.8083	-5.65138	3.56037e-05	0.000667282	2.29846
tetur36g01310	Hypothetical protein	-0.589896	8.06654	-4.75015	0.000215308	0.00224888	0.498014
tetur16g90593	hypothetical protein	-0.590002	11.4726	-6.06534	1.61234e-05	0.000393049	3.09228
tetur11g02570	basigin	-0.590439	13.7413	-7.69063	9.00328e-07	5.75879e-05	5.97695
tetur01g02350	Hypothetical protein	-0.590586	7.31097	-4.81689	0.00018784	0.00204144	0.634254
tetur30g02190	Possible homolog of the DHR78 (NR2D1)	-0.591647	13.9478	-5.69417	3.27699e-05	0.000634645	2.38156
tetur09g01370	Zinc finger, C2H2-like	-0.595998	11.3194	-5.8231	2.5561e-05	0.000538402	2.63052
tetur07g01570	glass transcription factor	-0.599013	10.742	-5.67687	3.38863e-05	0.000647275	2.34799
tetur38g00520	Hypothetical protein	-0.59936	7.54004	-6.42449	8.26259e-06	0.000243525	3.76204
tetur31g01080	39S ribosomal protein L18; mitochondrial precursor	-0.599702	9.97585	-5.10871	0.000104015	0.00136572	1.22499
tetur13g01900	CaaX prenyl proteinase Rce1	-0.599783	13.6322	-5.05077	0.000116878	0.00147188	1.10838
tetur01g15050	Hypothetical protein	-0.600207	7.16461	-5.66417	3.47307e-05	0.000658891	2.32333
tetur10g04810	Leukocyte elastase inhibitor	-0.600252	12.3795	-4.48368	0.000372894	0.00328675	-0.0494802
tetur01g01180	Low density lipoprotein-receptor; class A (cysteine-rich) repeat	-0.601508	10.8456	-5.1117	0.000103394	0.00136131	1.23099
tetur05g01920	Carbonic anhydrase, alpha-class, conserved site	-0.60348	7.51254	-5.60749	3.87747e-05	0.000710479	2.21297
tetur10g01670	AAR2	-0.606976	7.67002	-6.47829	7.48661e-06	0.000229941	3.86081
tetur06g05540	Hypothetical protein	-0.608312	7.77095	-8.30173	3.33106e-07	3.29302e-05	6.96515
tetur06g02270	Hypothetical protein	-0.608465	6.52608	-5.84994	2.42789e-05	0.000519184	2.68208
tetur13g01870	Hypothetical protein	-0.609283	13.2608	-3.46656	0.00316607	0.0153718	-2.16228
tetur39g00280	Membrane-bound beta-1;4-galactosyltransferase precursor	-0.609718	11.2202	-4.43092	0.000416057	0.00355049	-0.158488
tetur01g06570	sodium-dependent glucose transporter 1	-0.610729	9.32624	-2.98273	0.00876366	0.0327089	-3.14936
tetur27g00600	Hypothetical protein	-0.611725	7.96939	-8.34799	3.09549e-07	3.23307e-05	7.03786
tetur13g04180	conserved hypothetical protein	-0.612419	11.3439	-4.50677	0.00035547	0.00317126	-0.00183347
tetur08g00460	adenylate cyclase	-0.614679	8.14261	-4.28363	0.000565508	0.00443503	-0.463581
tetur16g01560	Hypothetical protein	-0.616692	8.30646	-5.92889	2.08813e-05	0.00046887	2.83316
tetur19g02850	Hypothetical protein	-0.616913	10.7221	-5.3084	6.98104e-05	0.00103601	1.62404
tetur04g04860	Beta-thymosin	-0.617309	11.704	-6.65959	5.38541e-06	0.000185747	4.1906
tetur09g00220	UDP-glucuronosyl/UDP-glucosyltransferase	-0.619071	11.9753	-5.24377	7.93848e-05	0.00113649	1.49539
tetur05g08290	Hypothetical protein	-0.619607	7.82491	-8.07181	4.81547e-07	4.00681e-05	6.59937
tetur07g01290	Na	-0.61991	9.02692	-5.7461	2.96414e-05	0.000596422	2.4821
tetur02g90629	hypothetical protein	-0.621072	10.5963	-3.82249	0.00149125	0.00879982	-1.42322
tetur12g02860	ovo	-0.621761	8.76502	-4.45289	0.000397491	0.00343425	-0.113064
tetur15g02090	solute carrier family 6	-0.622549	9.19239	-5.67818	3.38005e-05	0.000646521	2.35053
tetur09g06340	Nose resistant-to-fluoxetine protein; N-terminal	-0.622555	12.0438	-5.13448	9.87715e-05	0.00131922	1.27674
tetur08g06290	punt	-0.622943	11.4534	-5.26032	7.68119e-05	0.00111106	1.52837
tetur15g02510	Hypothetical protein	-0.625716	7.63661	-7.51912	1.20045e-06	6.94569e-05	5.69028
tetur16g00900	SH3-binding, glutamic acid-rich protein	-0.626144	10.7195	-4.46305	0.000389197	0.00338886	-0.0920761
tetur19g02210	Hypothetical protein	-0.626882	11.9133	-3.32865	0.0042373	0.0188891	-2.4465
tetur08g00210	DNA-binding HORMA	-0.626961	12.8934	-4.69716	0.000240024	0.00241305	0.38958
tetur02g04730	Hypothetical protein	-0.627553	7.85227	-7.57424	1.09397e-06	6.54694e-05	5.78286
tetur06g02820	Cytochrome P450 - CYP392E3	-0.628494	9.4053	-5.66157	3.49066e-05	0.000659605	2.31827
tetur11g04470	serum amyloid A protein-like	-0.629718	12.842	-2.72412	0.0149754	0.0490064	-3.66087
tetur10g01960	vasa	-0.629929	13.9569	-6.5714	6.31787e-06	0.000209753	4.03076
tetur19g00240	cuticular protein analogous to peritrophins 1-A	-0.630234	8.98786	-3.31395	0.00437079	0.0193665	-2.47668
tetur01g02890	Hypothetical protein	-0.631404	7.33417	-7.79691	7.54763e-07	5.20362e-05	6.15252
tetur32g00890	up	-0.631889	11.156	-5.91673	2.13706e-05	0.000476024	2.80995
tetur17g00510	lipase 1 precursor	-0.632092	8.32208	-2.88186	0.0108112	0.0384571	-3.35059
tetur02g08780	RNA-directed RNA polymerase 3	-0.633647	7.78854	-4.83961	0.000179334	0.00197896	0.680534
tetur02g02440	Translocon-associated protein subunit gamma	-0.633656	14.661	-5.86606	2.35415e-05	0.000508146	2.71299
tetur22g01100	nucleoprotein	-0.635975	11.4752	-4.07007	0.000884836	0.00607107	-0.90754
tetur217g90175	hypothetical protein	-0.636106	6.90339	-6.39787	8.67716e-06	0.00024896	3.71301
tetur04g02490	Hypothetical protein	-0.636188	6.84582	-5.59763	3.95267e-05	0.000715816	2.19373
tetur04g06660	L-aminoadipate-semialdehyde dehydrogenase-phosphopantetheinyl transferase	-0.636333	8.31654	-6.02301	1.74652e-05	0.000415589	3.01218
tetur01g00610	Hypothetical protein	-0.637702	9.47347	-4.1598	0.000732868	0.005328	-0.720839
tetur12g04390	no-mechanoreceptor potential A; putative	-0.638686	8.21121	-4.74732	0.000216556	0.00225689	0.492244
tetur16g03660	Hypothetical protein	-0.638751	6.63782	-4.37825	0.000464227	0.00385768	-0.267458
tetur21g02710	goosecoid transcription factor	-0.638861	6.83203	-7.27397	1.82334e-06	8.7866e-05	5.27329
tetur09g05080	troponin I	-0.640224	11.8307	-4.31757	0.000526818	0.0042073	-0.393179
tetur02g03000	Hypothetical protein	-0.642857	8.34148	-4.93285	0.000148353	0.00173107	0.87
tetur28g02510	Aldehyde dehydrogenase; N-terminal	-0.643372	8.89991	-7.19882	2.07591e-06	9.64885e-05	5.14376
tetur18g02060	tribbles homolog 2	-0.643843	11.9801	-4.62849	0.000276441	0.00265292	0.248706
tetur14g00720	Hypothetical protein	-0.645258	9.31818	-6.38091	8.95235e-06	0.000254758	3.68174
tetur27g00340	Cytochrome P450 - CYP392E7	-0.64561	11.7357	-3.11838	0.00659728	0.0266413	-2.87581
tetur09g04800	Gamma-interferon-inducible lysosomal thiol reductase precursor	-0.646404	14.6609	-3.8353	0.00145146	0.00862339	-1.39655
tetur02g14190	Rieske [2Fe-2S] iron-sulphur domain	-0.646783	6.85631	-6.3073	1.02569e-05	0.000276639	3.54548
tetur12g01830	Cathepsin L	-0.647629	14.1548	-4.49582	0.000363631	0.00321934	-0.0244336
tetur05g03220	Homeobox, conserved site	-0.648504	9.33111	-4.05143	0.000920221	0.0062593	-0.946358
tetur32g02180	Carbonyl reductase [NADPH] 1; pseudo gene	-0.648885	7.44356	-12.1076	1.7326e-09	1.19861e-06	12.0863
tetur17g00930	Hypothetical protein	-0.649372	12.0958	-5.54353	4.39284e-05	0.000760916	2.08795
tetur03g02650	alpha-glucosidase	-0.649941	12.4129	-3.90147	0.00126219	0.00781525	-1.25872
tetur11g00920	Limkain b1	-0.651136	7.75523	-10.8294	8.63837e-09	3.32642e-06	10.5457
tetur26g02620	ABC-transporter; class H	-0.652183	11.0747	-4.04902	0.000924895	0.00627579	-0.951373
tetur01g08550	Hypothetical protein	-0.65388	8.83717	-4.26441	0.00058868	0.00455339	-0.503462
tetur28g01070	short chain dehydrogenase	-0.654454	7.00567	-6.98436	3.01866e-06	0.000124533	4.76966
tetur04g00040	Protein of unknown function DUF2359, TMEM214	-0.654463	12.9299	-8.3911	2.89162e-07	3.07792e-05	7.10539
tetur03g08640	PREDICTED: similar to forked CG5424-PB	-0.655095	9.20937	-4.06196	0.000900058	0.00614915	-0.924427
tetur02g04850	Phospholipase B-like	-0.661414	10.4789	-5.4562	5.21321e-05	0.000840382	1.91645
tetur28g92005	hypothetical protein	-0.662981	9.83312	-7.29083	1.77123e-06	8.65988e-05	5.30224
tetur27g02588	Insulin-like growth factor binding protein, N-terminal	-0.664375	12.3563	-5.08856	0.000108315	0.00139846	1.18448
tetur01g14760	GA23102	-0.664574	10.4925	-5.63893	3.6475e-05	0.000679956	2.27423
tetur07g02660	Leucine-rich repeat domain, L domain-like	-0.66606	7.80597	-4.57617	0.000307941	0.00287412	0.141147
tetur11g03760	Carboxyl/cholinesterase	-0.666417	8.7422	-4.31463	0.000530057	0.00422108	-0.399269
tetur17g03820	conserved hypothetical protein	-0.666797	7.40681	-8.2619	3.54901e-07	3.38955e-05	6.90229
tetur14g03290	zinc finger protein 287	-0.667103	7.85711	-4.80535	0.000192318	0.00208367	0.610731
tetur07g01650	Hypothetical protein	-0.6706	14.3941	-6.9339	3.2996e-06	0.000132976	4.68069
tetur02g10640	Carboxyl/cholinesterase	-0.671036	11.1353	-4.21378	0.000654462	0.00490438	-0.608608
tetur09g06130	Uncharacterized epimerase/dehydratase MW0508	-0.671166	10.4106	-3.53676	0.00272918	0.0137484	-2.01703
tetur17g03810	Hypothetical protein	-0.673489	7.77551	-5.6281	3.72512e-05	0.0006889	2.25313
tetur10g00110	PAN/Apple domain	-0.676704	11.4544	-6.72049	4.82609e-06	0.00017264	4.30035
tetur14g02080	Immunoglobulin E-set	-0.677298	15.4289	-3.97583	0.001079	0.00695908	-1.10381
tetur09g03940	viral A-type inclusion protein	-0.677383	11.9433	-4.52925	0.000339309	0.00306433	0.044508
tetur16g03650	Legumain	-0.678283	9.44473	-3.31132	0.00439514	0.0194471	-2.48208
tetur03g00220	Hypothetical protein	-0.679629	11.7788	-5.76419	2.8626e-05	0.000585279	2.51703
tetur06g00440	sodium/solute symporter	-0.683487	8.56715	-3.5406	0.0027071	0.0136668	-2.00908
tetur180g00010	Hypothetical protein	-0.685738	7.25367	-5.71234	3.16381e-05	0.000618839	2.41678
tetur23g01960	Nose resistant-to-fluoxetine protein; N-terminal	-0.685865	9.2956	-4.50038	0.000360213	0.00320332	-0.0150318
tetur01g09800	Hypothetical protein	-0.687288	9.686	-5.10602	0.000104579	0.0013668	1.21959
tetur06g03440	Apolipoprotein D	-0.688753	9.04771	-2.9948	0.00854552	0.0321529	-3.12514
tetur03g91569	hypothetical protein	-0.690249	9.50663	-5.12638	0.000100391	0.00133574	1.26047
tetur13g02070	2-amino-3-ketobutyrate coenzyme A ligase	-0.691513	10.2606	-4.03075	0.000961136	0.00646507	-0.989408
tetur10g02210	Neuropeptide precursor	-0.692979	11.0485	-4.80145	0.000193857	0.00209383	0.602776
tetur32g01970	CutC family protein	-0.695116	8.25499	-4.36511	0.000477101	0.00394018	-0.294656
tetur20g00530	Phosphatidic acid phosphatase type 2/haloperoxidase	-0.696243	12.7172	-3.76835	0.00167204	0.00956276	-1.53594
tetur06g03030	Calycin-like	-0.697439	8.20678	-3.44006	0.00334855	0.0160345	-2.21702
tetur02g14861	BTB/Kelch-associated	-0.698635	6.94144	-7.79166	7.61338e-07	5.20362e-05	6.14389
tetur12g03000	Carboxylesterase type B, conserved site	-0.698729	8.54947	-4.7537	0.000213749	0.0022366	0.505267
tetur09g04720	Apolipoprotein D precursor	-0.699315	10.4499	-3.13772	0.00633478	0.0258281	-2.83658
tetur10g05771	Major facilitator, sugar transporter-like	-0.700039	9.50782	-4.64139	0.000269193	0.00260307	0.275197
tetur03g05420	Homeodomain-like	-0.700676	7.91839	-6.36033	9.2987e-06	0.000261942	3.64372
tetur05g05270	Glutathione S-transferase; class mu	-0.703691	9.09147	-4.98648	0.000133081	0.00161223	0.97858
tetur13g03700	Carboxyl/cholinesterase	-0.711277	10.1985	-3.96876	0.00109519	0.00703571	-1.11853
tetur12g01280	Hypothetical protein	-0.711412	8.79633	-7.35012	1.59997e-06	8.10618e-05	5.40373
tetur09g03820	microsomal triglyceride transfer protein large subunit	-0.714506	11.1758	-4.6933	0.000241934	0.00242525	0.381676
tetur10g05250	Hypothetical protein	-0.714514	8.01911	-8.82649	1.47173e-07	2.01194e-05	7.77345
tetur05g06350	Tudor domain	-0.716429	10.0383	-8.655	1.91505e-07	2.38423e-05	7.51329
tetur26g01510	Glutathione S-transferase; class delta	-0.716772	9.91899	-5.05618	0.000115611	0.00146553	1.11928
tetur22g01530	lethal	-0.720015	9.9745	-3.30483	0.0044557	0.0196677	-2.49539
tetur15g02520	Hypothetical protein	-0.721635	7.67455	-9.28674	7.38361e-08	1.28549e-05	8.45306
tetur01g02320	Glutathione S-transferase; class omega	-0.722497	11.0088	-5.36547	6.23465e-05	0.00095534	1.73726
tetur20g02630	LY6_UPAR protein	-0.723269	9.86971	-5.1427	9.71583e-05	0.00130644	1.29322
tetur10g00510	3-methyl-2-oxobutanoate hydroxymethyltransferase	-0.724274	10.854	-5.54195	4.40644e-05	0.000762325	2.08486
tetur14g03240	Hypothetical protein	-0.724559	6.88709	-4.00891	0.00100636	0.0066411	-1.03489
tetur02g10240	fatty acid synthase	-0.724786	8.89681	-4.66138	0.00025834	0.00253773	0.316233
tetur10g04780	Protease inhibitor I4; serpin	-0.727704	8.74552	-6.40501	8.56394e-06	0.000247237	3.72617
tetur28g00630	Fibrillar collagen precursor	-0.729142	9.33354	-5.70147	3.23103e-05	0.000628446	2.39571
tetur05g05640	Highly Expressed Secreted Protein Family	-0.729923	9.48727	-3.4113	0.0035585	0.0167041	-2.27637
tetur04g08680	Immunoglobulin E-set	-0.730538	12.5953	-4.08095	0.000864819	0.00598166	-0.884883
tetur09g02830	Hypothetical protein	-0.732038	6.96254	-10.8738	8.14976e-09	3.32642e-06	10.602
tetur02g02800	Hypothetical protein	-0.732739	10.4474	-2.98688	0.00868809	0.0325347	-3.14104
tetur16g03520	Apple-like	-0.735522	6.86896	-5.15652	9.45031e-05	0.00127813	1.32094
tetur31g00720	3-Pan module Cell Surface Protein; antigen-2	-0.736	9.75699	-5.11947	0.000101793	0.00134924	1.2466
tetur03g03900	ZnF_C2H2 domain-containing protein	-0.736469	12.999	-5.28985	7.24298e-05	0.00106424	1.58717
tetur12g00620	C-factor	-0.737077	11.1277	-3.97991	0.00106975	0.00692831	-1.0953
tetur08g02870	2-ketogluconate reductase	-0.739372	7.76569	-5.59274	3.99053e-05	0.000717599	2.18418
tetur05g05290	Glutathione S-transferase; class mu	-0.739852	9.36658	-4.46426	0.000388228	0.0033834	-0.0895938
tetur01g09830	D-3-phosphoglycerate dehydrogenase	-0.740352	13.4629	-2.91888	0.0100107	0.0362574	-3.27697
tetur10g03910	SMAD domain, Dwarfin-type	-0.740516	8.2797	-3.28035	0.00469184	0.0204511	-2.54559
tetur03g09510	hypothetical protein	-0.740551	11.2062	-2.733	0.0147044	0.048381	-3.64355
tetur05g05730	Wannes-Thomas Secreted Protein 11	-0.745266	10.2042	-4.68635	0.000245412	0.00245035	0.367435
tetur03g03530	Hypothetical protein	-0.746711	7.59067	-7.28835	1.77879e-06	8.65988e-05	5.29799
tetur30g00290	PREDICTED: lysophospholipase 3	-0.750335	12.6531	-5.20066	8.65167e-05	0.00120278	1.40929
tetur01g01170	Hypothetical protein	-0.750814	7.90861	-7.88371	6.54236e-07	4.83898e-05	6.29474
tetur06g03420	Hypothetical protein	-0.753551	7.94966	-3.96785	0.0010973	0.00704207	-1.12044
tetur10g04830	geranylgeranyl pyrophosphate synthase	-0.753622	14.0141	-5.95254	1.99626e-05	0.000452616	2.87824
tetur36g01130	Leucine-rich repeat domain, L domain-like	-0.75367	10.7051	-6.8923	3.55176e-06	0.0001403	4.60705
tetur18g02080	Hypothetical protein	-0.753974	8.92824	-4.14108	0.000762211	0.00546722	-0.759757
tetur30g01680	Hypothetical protein	-0.754611	7.87915	-4.39627	0.00044713	0.00374302	-0.23014
tetur06g03380	Hypothetical protein	-0.758874	9.97557	-3.34579	0.00408671	0.0184298	-2.41127
tetur22g02120	Lipase/lipooxygenase; PLAT/LH2	-0.7614	12.4202	-3.21249	0.00541308	0.022845	-2.68436
tetur15g04107	n/a	-0.762891	8.38893	-7.4639	1.31805e-06	7.32228e-05	5.59709
tetur07g01630	HD domain	-0.764377	10.7915	-7.07734	2.56436e-06	0.000111511	4.93267
tetur10g04390	Outer membrane protein Iml2/Tetratricopeptide repeat protein 39	-0.765991	7.74542	-3.61539	0.00231086	0.0121411	-1.85396
tetur13g04460	3-oxoacyl-acyl-carrier-protein reductase	-0.766179	7.72126	-4.18363	0.000697142	0.0051325	-0.67128
tetur31g01850	Hypothetical protein	-0.767284	12.4722	-3.05416	0.00754801	0.0293911	-3.00569
tetur19g01420	Hypothetical protein	-0.76918	8.46935	-8.75211	1.64908e-07	2.14904e-05	7.66108
tetur13g03450	GM21310	-0.769358	13.0763	-4.2124	0.000656361	0.00491449	-0.611483
tetur02g12500	BTB/Kelch-associated	-0.771561	8.83628	-5.46861	5.08757e-05	0.000828885	1.94088
tetur08g04580	EGF-like; type 3	-0.771966	7.07159	-5.11079	0.000103582	0.00136131	1.22917
tetur01g09790	Hypothetical protein	-0.77802	11.4938	-5.76158	2.87699e-05	0.000586502	2.51201
tetur02g12370	BTB/Kelch-associated	-0.778115	7.63433	-4.45987	0.000391776	0.00340157	-0.0986482
tetur07g03780	Translocon-associated protein subunit delta precursor	-0.779112	14.09	-5.29018	7.23821e-05	0.00106424	1.58783
tetur02g08820	RNA-directed RNA polymerase 2	-0.781434	11.7027	-5.34824	6.45089e-05	0.000979861	1.70312
tetur10g00730	PREDICTED: similar to AGAP003501-PA	-0.783106	12.9906	-5.17365	9.13174e-05	0.00124592	1.35525
tetur09g03750	Hypothetical (neuro)peptide precursor	-0.786285	9.59625	-5.08275	0.000109589	0.00141099	1.17279
tetur08g04570	Hypothetical protein	-0.786374	7.543	-9.34942	6.73419e-08	1.23555e-05	8.54354
tetur02g14380	Legumain	-0.786657	12.1129	-5.10396	0.000105014	0.00137108	1.21544
tetur04g03940	Calponin-like actin-binding	-0.787031	13.1347	-5.65724	3.52007e-05	0.000663296	2.30986
tetur18g02250	fatty acyl-CoA reductase 1	-0.788512	10.5472	-4.95196	0.000142715	0.00168887	0.908723
tetur02g03070	orphan secreted protein	-0.788663	7.65954	-4.66637	0.0002557	0.00251622	0.326475
tetur04g08550	Insulin-like	-0.789529	7.61897	-5.09744	0.000106399	0.0013814	1.20233
tetur05g05230	Hypothetical protein	-0.792778	6.62602	-4.60538	0.000289927	0.00274457	0.201222
tetur17g02520	Destabilase	-0.794364	9.9265	-3.06683	0.00735036	0.0288551	-2.98012
tetur20g01410	Hypothetical protein	-0.795757	13.6077	-4.57176	0.000310762	0.00289077	0.132061
tetur18g92102	hypothetical protein	-0.797784	15.1608	-3.17887	0.00580986	0.0241468	-2.75289
tetur17g03410	Domain of unknown function DUF3421	-0.800889	7.06706	-3.87436	0.00133652	0.00815	-1.31519
tetur11g05180	Hypothetical protein	-0.801506	7.50194	-6.16565	1.33535e-05	0.000339011	3.28115
tetur08g06980	dehydrogenase/reductase SDR family member 7	-0.802896	13.4557	-5.98874	1.86363e-05	0.000433109	2.94714
tetur01g06610	Legumain	-0.804543	13.596	-2.86572	0.0111796	0.0394308	-3.38261
tetur05g04710	Legumain	-0.804752	9.80127	-5.25547	7.75567e-05	0.00111477	1.51871
tetur02g13990	Hypothetical protein	-0.806802	10.1214	-6.18419	1.28981e-05	0.000330609	3.31592
tetur05g09060	Hypothetical protein	-0.807172	8.95813	-6.45339	7.83589e-06	0.000236403	3.81515
tetur06g04920	3-oxoacyl-acyl-carrier-protein reductase	-0.807558	8.32649	-4.67177	0.000252881	0.00249376	0.337531
tetur21g03140	Cutoff-like protein	-0.807738	9.5061	-4.60424	0.000290611	0.00274917	0.198874
tetur08g03060	Hypothetical protein	-0.808511	9.20775	-3.899	0.00126878	0.00784561	-1.26386
tetur02g01270	short-chain dehydrogenase/reductase SDR	-0.810632	11.267	-4.12988	0.000780347	0.00556866	-0.783062
tetur24g00830	BTB/POZ-like	-0.81174	8.4267	-8.8382	1.44567e-07	1.99589e-05	7.79109
tetur15g01480	cuticular protein analogous to peritrophins 1-A	-0.813143	9.48397	-3.90927	0.00124159	0.00771168	-1.24247
tetur02g14360	Legumain	-0.814098	12.1574	-3.9812	0.00106686	0.00691303	-1.09262
tetur03g00430	Hypothetical protein	-0.815627	8.11834	-6.4658	7.65982e-06	0.000232961	3.8379
tetur02g04810	Hypothetical protein	-0.815923	8.15826	-3.86395	0.00136621	0.00823981	-1.33687
tetur25g01900	Hypothetical protein	-0.817172	14.7655	-3.64231	0.00218289	0.0116265	-1.79805
tetur04g06440	Hypothetical protein	-0.817566	8.30014	-4.64003	0.000269945	0.00260853	0.272415
tetur08g06770	Cathepsin B-like	-0.818494	7.65318	-3.4765	0.00310021	0.0151205	-2.14173
tetur15g00790	collagen alpha-1	-0.819057	8.7749	-7.55863	1.12308e-06	6.63569e-05	5.75669
tetur09g06725	n/a	-0.820365	7.57461	-12.6891	8.72705e-10	8.69214e-07	12.7355
tetur38g00350	phospholipase A2 precursor; putative	-0.82254	11.7094	-4.30274	0.000543381	0.00430506	-0.423934
tetur06g03930	Nucleotide-binding alpha-beta plait domain	-0.823803	10.8406	-4.94719	0.000144101	0.00169708	0.899065
tetur17g02210	Hypothetical protein	-0.824337	7.71773	-6.63268	5.65361e-06	0.000191319	4.14196
tetur60g00020	Legumain;	-0.829108	13.2427	-3.21551	0.00537881	0.0227279	-2.67821
tetur05g05630	Geneb-a protein	-0.829451	7.01693	-5.1967	8.72028e-05	0.0012087	1.40139
tetur03g05940	PREDICTED: similar to CG31028 CG31028-PB	-0.830756	14.6829	-2.85548	0.0114194	0.0400784	-3.40288
tetur19g00440	UDP-glycosyltransferase; teturUGT57	-0.830946	8.12367	-7.94671	5.90118e-07	4.59698e-05	6.39731
tetur20g01390	Hypothetical protein	-0.83162	12.3708	-3.55582	0.00262131	0.0133497	-1.97754
tetur44g00140	intradiol ring-cleavage dioxygenase	-0.834998	10.4359	-6.52113	6.92316e-06	0.000219901	3.93916
tetur01g16463	Peptidase C1A, papain C-terminal	-0.83728	10.1721	-5.46152	5.15905e-05	0.000835515	1.9269
tetur10g02800	S-formylglutathione hydrolase	-0.839853	10.4667	-5.71301	3.15973e-05	0.000618839	2.41807
tetur02g07720	Hypothetical protein	-0.840536	13.3383	-4.74242	0.000218741	0.00226775	0.482226
tetur22g02750	Small Secreted Protein; family A	-0.843984	8.46974	-4.08106	0.000864634	0.00598166	-0.884671
tetur21g01590	lysosomal acid lipase/cholesteryl ester hydrolase	-0.852093	6.83065	-8.85393	1.41145e-07	1.99589e-05	7.81474
tetur20g00020	Hypothetical protein	-0.853502	13.1944	-3.23142	0.00520153	0.0221263	-2.64571
tetur09g04630	Hypothetical protein	-0.854159	14.168	-8.96157	1.19898e-07	1.79121e-05	7.97571
tetur08g07510	innexin; putative	-0.854904	10.8096	-7.8391	7.0402e-07	4.99498e-05	6.22178
tetur31g01900	Protein of unknown function DUF388; OB-fold	-0.860494	11.7873	-3.20139	0.00554109	0.0232585	-2.70701
tetur11g01560	Carboxyl/cholinesterase	-0.862074	11.0361	-4.57743	0.000307143	0.00287412	0.143732
tetur01g08840	PREDICTED: transmembrane inner ear-like	-0.863328	7.16325	-14.383	1.36119e-10	2.37255e-07	14.4654
tetur14g03560	Hypothetical protein	-0.86336	8.11166	-4.3948	0.0004485	0.00374719	-0.233182
tetur02g10370	Double-stranded RNA binding	-0.87279	11.9477	-10.0743	2.39475e-08	7.25922e-06	9.55566
tetur02g11180	Superoxide dismutase; copper/zinc binding	-0.873338	13.3174	-3.01675	0.00816248	0.0310383	-3.08104
tetur04g03130	PREDICTED: rCG19957-like	-0.873797	9.05183	-5.34049	6.55069e-05	0.000990703	1.68775
tetur03g07020	Apple-like	-0.874642	7.22603	-7.18007	2.14445e-06	9.80402e-05	5.11132
tetur30g00040	Hypothetical protein	-0.875994	8.57251	-4.39537	0.000447969	0.00374714	-0.232004
tetur24g00640	Hypothetical protein	-0.876085	10.6814	-5.47735	5.00108e-05	0.000826244	1.95805
tetur11g00040	magnesium transporter NIPA2	-0.880957	10.6822	-6.63404	5.63975e-06	0.000191319	4.14442
tetur07g00820	proprotein convertase subtilisin/kexin type 1	-0.881101	13.3067	-3.48703	0.00303194	0.0148603	-2.11997
tetur02g08770	RNA-dependent RNA polymerase, eukaryotic-type	-0.884034	8.84854	-5.52802	4.52813e-05	0.000773777	2.05757
tetur09g03740	Wannes-Thomas type-I single-pass transmembrane protein	-0.885069	12.503	-5.33091	6.67618e-05	0.00100424	1.66875
tetur06g05630	Hypothetical protein	-0.886392	12.9115	-3.63277	0.00222739	0.011796	-1.81786
tetur04g01370	zinc/iron transporter; putative	-0.887163	7.17955	-6.68369	5.15639e-06	0.000182059	4.2341
tetur33g00930	PREDICTED: similar to conserved hypothetical protein	-0.889668	12.7674	-7.88217	6.55886e-07	4.83898e-05	6.29223
tetur30g01730	Hypothetical protein	-0.890369	14.847	-2.74029	0.0144857	0.0478758	-3.62933
tetur31g00920	Apolipoprotein D precursor	-0.890464	12.4761	-2.79024	0.013069	0.0443656	-3.53152
tetur31g02020	Apple-like	-0.890566	8.41957	-7.95735	5.79958e-07	4.54322e-05	6.41458
tetur22g02150	PLAT/LH2 domain	-0.893208	6.52733	-8.33315	3.16909e-07	3.25906e-05	7.01457
tetur10g02370	Apple-like	-0.894055	9.21001	-4.94932	0.000143481	0.00169121	0.903371
tetur03g00310	Carboxyl/cholinesterase	-0.89769	10.2649	-4.34224	0.000500396	0.00406378	-0.342044
tetur07g00750	PREDICTED: hypothetical protein; partial	-0.898216	11.9396	-5.02418	0.000123318	0.00152578	1.05475
tetur31g00900	Apolipoprotein D precursor	-0.898525	14.2003	-2.85036	0.0115411	0.0404039	-3.413
tetur02g12320	Lipase/lipooxygenase; PLAT/LH2	-0.900013	14.2623	-4.11342	0.000807786	0.00570606	-0.817306
tetur09g05660	protein-glutamine gamma-glutamyltransferase K	-0.902654	13.5334	-3.47157	0.00313272	0.0152417	-2.15193
tetur13g04450	short-chain dehydrogenase/reductase SDR	-0.903861	11.6431	-4.22235	0.000642824	0.00484516	-0.590803
tetur01g13750	PREDICTED: similar to dimethylaniline monooxygenase	-0.909167	11.1337	-4.26021	0.000593877	0.00457515	-0.512189
tetur517g00010	Hypothetical protein	-0.91524	7.74847	-5.7205	3.1143e-05	0.000614227	2.43258
tetur02g04010	Hypothetical protein	-0.917927	7.53686	-12.9329	6.59636e-10	7.07536e-07	12.999
tetur25g01630	non-ribosomal peptide synthetase	-0.920358	10.7241	-5.09256	0.000107449	0.00139244	1.19251
tetur04g05930	Calycin-like	-0.923896	13.6891	-7.67624	9.22191e-07	5.87171e-05	5.95305
tetur22g02590	PREDICTED: rCG19957-like	-0.924111	8.57642	-6.41782	8.3646e-06	0.000244716	3.74975
tetur10g02360	sialin	-0.927638	8.19553	-3.43081	0.00341472	0.0162286	-2.23612
tetur20g00010	Hypothetical protein	-0.929345	14.081	-2.71835	0.0151539	0.0494513	-3.6721
tetur03g09300	Lipid transport protein, beta-sheet shell	-0.930242	11.4267	-3.32168	0.00430009	0.0191139	-2.46081
tetur01g02540	Hypothetical protein	-0.930732	14.8701	-2.72297	0.0150107	0.0490874	-3.6631
tetur39g00720	Vitellogenin 6	-0.935849	15.1779	-2.85256	0.0114888	0.0402815	-3.40867
tetur19g03360	Intradiol ring-cleavage dioxygenase, core	-0.936482	13.4735	-3.92196	0.00120877	0.00756853	-1.21602
tetur21g03250	Hypothetical protein	-0.943644	8.21422	-4.10027	0.000830412	0.00581782	-0.844674
tetur06g02570	Cathepsin B-like	-0.945409	7.57835	-3.85273	0.00139898	0.00838668	-1.36025
tetur05g00370	variable lymphocyte receptor A diversity region	-0.94604	9.30099	-6.64954	5.48398e-06	0.000187884	4.17245
tetur32g02327	Short-chain dehydrogenase/reductase, conserved site	-0.951624	12.4143	-16.1136	2.45594e-11	8.69887e-08	16.0155
tetur05g01720	conserved secreted protein 1	-0.953514	9.18875	-3.29125	0.0045852	0.02015	-2.52324
tetur19g00740	Serine protease	-0.956654	14.3634	-3.63381	0.00222249	0.0117879	-1.8157
tetur02g00480	Hypothetical protein	-0.957496	11.1165	-4.48089	0.000375063	0.00330169	-0.0552529
tetur10g01980	vasa	-0.959814	11.2889	-7.20409	2.05707e-06	9.59322e-05	5.15287
tetur06g02040	Hypothetical protein	-0.961197	7.48576	-5.72977	3.05906e-05	0.000608496	2.45052
tetur01g10190	GM2 ganglioside activator	-0.962875	10.423	-3.57999	0.0024906	0.0128578	-1.92741
tetur02g90622	hypothetical protein	-0.967155	13.3388	-7.21234	2.0279e-06	9.54136e-05	5.16713
tetur21g03120	Cutoff-like protein	-0.970858	9.52665	-9.26556	7.61774e-08	1.28549e-05	8.42236
tetur23g00890	Cathepsin L-like	-0.972721	13.6492	-4.86361	0.000170771	0.00190804	0.729396
tetur25g00510	Hypothetical protein	-0.977351	14.6214	-3.6383	0.00220152	0.0116989	-1.80639
tetur21g01410	Hypothetical protein	-0.978326	13.286	-3.44508	0.00331326	0.0159256	-2.20667
tetur16g03570	antigen B membrane protein	-0.979375	6.92897	-9.00057	1.13052e-07	1.73231e-05	8.03367
tetur33g01620	Hypothetical protein	-0.981507	6.46084	-5.42317	5.56346e-05	0.000880555	1.85132
tetur01g03900	Methyltransferase type 11	-0.986363	7.3103	-5.96847	1.93674e-05	0.000443447	2.90858
tetur02g14460	PAN/Apple domain	-0.994142	8.88995	-4.12963	0.000780761	0.00556866	-0.783588
tetur01g15010	Apple-like	-0.995694	9.86481	-7.50593	1.2275e-06	7.07284e-05	5.66807
tetur06g03070	Calycin-like	-0.995912	8.72659	-3.65734	0.00211455	0.011358	-1.76682
tetur14g03430	Hypothetical protein	-1.00024	9.88616	-3.3503	0.00404794	0.0182905	-2.40199
tetur03g00300	Short-chain dehydrogenase/reductase SDR	-1.01222	8.94753	-8.54968	2.25509e-07	2.61771e-05	7.35161
tetur16g03310	3-Pan modules Cell Surface Protein; antigen-2	-1.02251	9.53852	-5.52915	4.5181e-05	0.000773012	2.05979
tetur97g00020	chaperone protein DnaJ	-1.02303	8.48757	-5.39128	5.92461e-05	0.00091792	1.78834
tetur08g02660	Hypothetical protein	-1.0248	15.2173	-6.43035	8.17427e-06	0.000241539	3.77281
tetur08g04590	EGF-like; type 3	-1.02909	7.84964	-4.90454	0.000157129	0.00180658	0.81257
tetur09g06300	Hypothetical protein	-1.03004	11.2707	-7.20462	2.05518e-06	9.59322e-05	5.15379
tetur05g04580	Wannes-Thomas Secreted Protein 10	-1.03297	14.8416	-5.2017	8.63372e-05	0.00120268	1.41137
tetur11g06390	hypothetical protein	-1.0381	15.568	-7.4122	1.43909e-06	7.63647e-05	5.50946
tetur08g05590	Kr-2; Ortholog of Drosophila melanogaster Kruppel	-1.04123	10.7054	-7.75555	8.08241e-07	5.3924e-05	6.08439
tetur07g00320	Hypothetical protein	-1.04123	14.6825	-4.74386	0.000218098	0.00226445	0.485162
tetur06g02140	apolipoprotein D	-1.04505	11.0309	-5.08076	0.000110028	0.00141462	1.16879
tetur35g00650	innexin; putative	-1.04591	12.1288	-10.813	8.82656e-09	3.32642e-06	10.5249
tetur33g01630	Hypothetical protein	-1.04658	10.265	-4.32806	0.000515409	0.00414789	-0.371423
tetur20g01400	Hypothetical protein	-1.04702	12.9011	-4.9587	0.000140778	0.00167207	0.922378
tetur02g10770	AGAP002847-PA	-1.04975	15.2639	-5.5246	4.55859e-05	0.000777078	2.05085
tetur03g09290	Hypothetical protein	-1.05012	7.35972	-7.65037	9.62891e-07	5.96736e-05	5.91003
tetur07g02730	Hypothetical protein	-1.05229	13.385	-3.83478	0.00145305	0.00862918	-1.39764
tetur13g04170	GE26306	-1.05433	11.903	-3.05914	0.00746972	0.0291922	-2.99565
tetur10g04150	lipoprotein	-1.05472	9.33781	-5.6724	3.4181e-05	0.00065112	2.33932
tetur33g01660	Hypothetical protein	-1.05544	10.5496	-6.63369	5.64331e-06	0.000191319	4.14378
tetur14g01360	ferritin	-1.06197	13.5946	-4.98132	0.000134476	0.0016249	0.968155
tetur11g00410	secreted salivary gland peptide; putative	-1.06771	13.0228	-3.49156	0.003003	0.0147443	-2.11058
tetur07g00740	MAM	-1.07701	10.817	-6.13711	1.40873e-05	0.000353638	3.22755
tetur03g08030	Cathepsin B	-1.08581	12.2111	-7.07674	2.56706e-06	0.000111511	4.93162
tetur17g00890	PREDICTED: similar to adenylate cyclase	-1.08639	9.65646	-11.3965	4.16088e-09	2.07212e-06	11.2493
tetur09g04730	Apolipoprotein D precursor	-1.0899	9.50121	-3.94743	0.00114556	0.00728318	-1.16297
tetur02g13360	Alpha/Beta hydrolase fold	-1.09143	10.5617	-4.29079	0.000557113	0.0043869	-0.448727
tetur13g01730	Hypothetical protein	-1.09387	14.4747	-4.02865	0.000965401	0.00648437	-0.993789
tetur01g09880	Hypothetical protein	-1.09514	11.4144	-5.97751	1.90378e-05	0.000440238	2.92578
tetur24g00280	Cathepsin B	-1.09546	9.81907	-10.5522	1.24796e-08	4.3504e-06	10.1895
tetur02g11420	Cathepsin B	-1.10606	13.7968	-4.38877	0.00045417	0.00378764	-0.245676
tetur05g04550	Legumain	-1.11901	8.08995	-7.86624	6.73276e-07	4.91527e-05	6.2662
tetur19g02860	cuticle protein; putative	-1.12753	10.2912	-4.10522	0.000821831	0.00577601	-0.834384
tetur04g02440	PREDICTED: similar to adenylate cyclase	-1.12833	8.10459	-5.35218	6.40072e-05	0.000975428	1.71094
tetur14g00870	conserved hypothetical protein	-1.12983	13.5579	-6.85339	3.8058e-06	0.000147411	4.53796
tetur15g02020	Hypothetical protein	-1.1446	9.96494	-3.65653	0.00211819	0.0113719	-1.76851
tetur83g90373	hypothetical protein	-1.14543	7.54923	-9.9242	2.95307e-08	7.91878e-06	9.35114
tetur09g00460	Na+ channel/degenerin (ENaC/DEG) family protein	-1.14636	6.88941	-8.50022	2.43611e-07	2.73945e-05	7.27517
tetur06g05070	short-chain dehydrogenase/reductase SDR	-1.14795	9.19282	-6.16393	1.33965e-05	0.000339021	3.27794
tetur01g10430	sodium-dependent glucose transporter 1	-1.15418	7.55035	-4.12555	0.000787469	0.00560207	-0.792066
tetur02g11530	Aldo-keto reductase family D; member 2	-1.15799	11.9388	-8.02561	5.18977e-07	4.19932e-05	6.525
tetur08g06760	Hypothetical protein	-1.16337	11.497	-4.14851	0.000750423	0.00541329	-0.744306
tetur03g09330	glucose dehydrogenase	-1.16887	12.0576	-3.64208	0.00218395	0.0116277	-1.79853
tetur39g00220	Hypothetical protein	-1.17332	12.2404	-6.82025	4.03709e-06	0.000154652	4.47895
tetur09g92864	hypothetical protein	-1.19402	7.4492	-5.7311	3.05119e-05	0.000607797	2.4531
tetur02g09770	Orfan gene family; member-16	-1.20178	7.09194	-5.8492	2.43135e-05	0.000519184	2.68066
tetur02g12410	BTB/Kelch-associated	-1.20264	7.18373	-6.06251	1.62097e-05	0.000393807	3.08693
tetur04g05540	ABC-transporter; class C	-1.2078	8.35637	-5.47411	5.03293e-05	0.00082661	1.95169
tetur30g01870	Hypothetical protein	-1.20918	9.38319	-6.38508	8.88391e-06	0.000253458	3.68943
tetur12g00570	C-signal	-1.20946	9.87262	-7.34847	1.60449e-06	8.10618e-05	5.40091
tetur17g02390	Concanavalin A-like lectin/glucanase	-1.21284	10.7383	-7.0896	2.51004e-06	0.00011041	4.95407
tetur20g00580	Nose resistant-to-fluoxetine protein; N-terminal	-1.21903	11.0598	-11.0607	6.38974e-09	2.87415e-06	10.8368
tetur31g01860	Hypothetical protein	-1.22895	8.68694	-2.96801	0.00903692	0.0334158	-3.17884
tetur02g07250	PREDICTED: similar to Glucosylceramidase precursor	-1.23825	10.949	-6.43023	8.17603e-06	0.000241539	3.77259
tetur02g13950	Hypothetical protein	-1.23874	8.85613	-4.90631	0.000156567	0.00180428	0.81615
tetur01g12680	CRAL-TRIO lipid binding domain	-1.23903	11.552	-4.70957	0.000233987	0.00237288	0.414996
tetur148g00010	Hypothetical protein	-1.23988	8.1658	-4.6744	0.000251516	0.00248557	0.342931
tetur09g00600	Cathepsin B	-1.24389	11.2477	-7.32609	1.66719e-06	8.33264e-05	5.36266
tetur14g02070	Immunoglobulin E-set	-1.24875	14.6152	-5.34506	6.49167e-05	0.000982843	1.69681
tetur43g00580	Hypothetical protein	-1.2514	13.4903	-4.41151	0.000433184	0.00365636	-0.198622
tetur31g01890	Hypothetical protein	-1.25391	9.80291	-3.01902	0.00812383	0.0309397	-3.07648
tetur21g02460	Glycoside hydrolase; family 22	-1.25575	9.50818	-7.58778	1.06937e-06	6.48315e-05	5.80554
tetur06g05090	short chain dehydrogenase	-1.26486	9.84458	-6.03252	1.71541e-05	0.000410991	3.03019
tetur20g00200	Secreted Protein with 8aa repeat structure	-1.26984	12.9533	-2.80848	0.012586	0.0430991	-3.49566
tetur05g01470	Hypothetical protein	-1.2775	14.1974	-3.54224	0.00269769	0.0136292	-2.00567
tetur04g09479	Small Secreted Protein; Family F	-1.28057	12.2048	-7.19199	2.10062e-06	9.73127e-05	5.13194
tetur05g04560	Wannes-Thomas Secreted Protein 8	-1.28123	13.4792	-7.48493	1.27191e-06	7.12423e-05	5.63263
tetur32g00940	Conserved hypothetical protein CHP02464	-1.28516	13.8187	-10.2791	1.80622e-08	5.59688e-06	9.83038
tetur32g00960	Hypothetical protein	-1.29175	8.0285	-8.02321	5.21e-07	4.19932e-05	6.52113
tetur02g07570	Lecithin:cholesterol/phospholipid:diacylglycerol acyltransferase	-1.29396	7.29364	-6.34515	9.56316e-06	0.000264963	3.61563
tetur01g11840	Conserved zygote-specific protein homologue	-1.3122	13.9175	-5.03628	0.000120343	0.0014956	1.07917
tetur12g00580	Hypothetical protein	-1.3262	8.17662	-10.3169	1.71528e-08	5.43587e-06	9.88063
tetur14g01780	cuticular protein; putative	-1.33467	13.9378	-3.98817	0.0010513	0.00685337	-1.0781
tetur25g00520	Hypothetical protein	-1.38146	12.761	-4.18755	0.000691433	0.00510935	-0.663124
tetur10g04760	serpin 3 inhibitory serine protease inhibitor	-1.38358	11.8348	-8.04054	5.06558e-07	4.13067e-05	6.54906
tetur05g05450	Hypothetical protein	-1.39542	10.3001	-5.10731	0.000104308	0.0013668	1.22218
tetur40g00150	Hypothetical protein	-1.39896	15.0894	-7.11733	2.39154e-06	0.000107227	5.00239
tetur05g03750	Hypothetical protein	-1.40084	10.0387	-3.97617	0.00107822	0.00695732	-1.1031
tetur17g00080	Carboxyl/cholinesterase	-1.40633	9.03686	-6.76968	4.41869e-06	0.000163846	4.38859
tetur16g03740	Wannes-Thomas Secreted Protein 12	-1.40708	9.23628	-3.97921	0.00107133	0.00693207	-1.09675
tetur39g00700	Vitellogenin 3	-1.41208	15.0179	-3.26759	0.00481983	0.0208784	-2.57173
tetur31g00680	Apolipoprotein D precursor	-1.43002	12.8063	-4.88641	0.00016303	0.0018467	0.775742
tetur04g09489	Small Secreted Protein; Family F	-1.43516	9.97355	-3.02692	0.00799077	0.0305323	-3.06059
tetur02g09750	Orfan gene family A; member-17	-1.43727	7.46246	-5.91475	2.14514e-05	0.000476303	2.80616
tetur12g04671	Intradiol ring-cleavage dioxygenase, C-terminal	-1.47079	8.964	-5.45052	5.27182e-05	0.000847869	1.90525
tetur22g02040	LY6_UPAR protein	-1.48123	11.5283	-2.77594	0.0134605	0.0453803	-3.55959
tetur02g12430	BTB/Kelch-associated	-1.4894	7.86352	-6.53635	6.73375e-06	0.000217662	3.96693
tetur07g06700	Beta;beta-carotene 9';10'-oxygenase; CMO-II	-1.50219	8.21786	-7.85462	6.86258e-07	4.98395e-05	6.2472
tetur23g00880	Cathepsin L	-1.50637	12.2724	-7.48962	1.26184e-06	7.12423e-05	5.64055
tetur17g03230	Alpha/Beta hydrolase fold	-1.518	10.8116	-4.4075	0.000436809	0.00367806	-0.206913
tetur06g02780	Hypothetical protein	-1.53395	9.08654	-5.09869	0.000106132	0.00138013	1.20485
tetur28g01130	short chain dehydrogenase	-1.53829	10.6248	-4.23097	0.000631341	0.00480012	-0.572915
tetur95g00050	Hypothetical protein	-1.54429	13.9761	-5.47082	5.06554e-05	0.000828065	1.94523
tetur06g06640	Cystatin	-1.572	8.46264	-10.8393	8.52603e-09	3.32642e-06	10.5584
tetur40g00210	Hypothetical protein	-1.59493	13.3346	-5.49162	4.86286e-05	0.000810129	1.98613
tetur06g02930	Peptidase C1A; papain C-terminal	-1.62036	11.9474	-6.94353	3.24397e-06	0.000131877	4.69769
tetur31g00690	Cysteine peptidase, asparagine active site	-1.65358	10.2534	-3.0819	0.00712197	0.0282253	-2.94968
tetur05g05030	UDP-glycosyltransferase; teturUGT27	-1.66216	8.97059	-7.88626	6.51502e-07	4.83898e-05	6.2989
tetur09g04200	Zinc finger, C2H2	-1.68899	9.19486	-7.4912	1.25848e-06	7.12423e-05	5.64322
tetur06g02940	Calycin-like	-1.69785	11.7533	-6.00022	1.82354e-05	0.000428072	2.96893
tetur28g01730	3-oxoacyl-acyl-carrier-protein reductase	-1.69845	14.4349	-8.10131	4.59138e-07	3.92774e-05	6.6467
tetur31g00810	Hypothetical protein	-1.70041	8.87595	-3.65604	0.0021204	0.0113719	-1.76953
tetur01g05230	Cathepsin B	-1.70959	10.9169	-7.09615	2.4815e-06	0.000109848	4.96549
tetur08g00230	Hypothetical protein	-1.75912	12.0751	-10.8222	8.72064e-09	3.32642e-06	10.5365
tetur05g05020	UDP-glycosyltransferase; teturUGT26	-1.81134	8.88355	-7.3555	1.5853e-06	8.0972e-05	5.41293
tetur01g13180	M13 family peptidase	-1.8129	10.1162	-7.54072	1.15749e-06	6.725e-05	5.72661
tetur01g12620	Wannes-Thomas Secreted Protein 1	-1.83117	8.71149	-9.58017	4.81612e-08	9.75166e-06	8.87253
tetur06g03360	Apolipoprotein D precursor	-1.89098	9.44457	-4.79288	0.00019728	0.00212259	0.585297
tetur06g03340	Apolipoprotein D precursor	-1.92966	9.99724	-5.40591	5.756e-05	0.000901218	1.81725
tetur24g00220	Hypothetical protein	-1.93286	12.078	-11.4476	3.90161e-09	2.04063e-06	11.3111
tetur31g00700	Cathepsin L	-1.94073	10.4989	-5.43141	5.47385e-05	0.000870268	1.86758
tetur01g03820	UDP-glycosyltransferase; teturUGT01	-1.97726	7.83197	-6.03969	1.69232e-05	0.000406856	3.04377
tetur17g00740	Hypothetical protein	-2.00559	9.03001	-6.53184	6.78932e-06	0.000217662	3.9587
tetur01g16473	Peptidase C1A, papain C-terminal	-2.00561	7.75306	-5.00141	0.000129123	0.00158077	1.00876
tetur07g03400	Hypothetical protein	-2.02995	9.46084	-13.63	3.0347e-10	3.8469e-07	13.7245
tetur09g00110	methyltransferase type 11	-2.08999	14.9504	-6.79006	4.26055e-06	0.000161	4.42505
tetur06g03370	Apolipoprotein D	-2.09196	7.92565	-5.78874	2.73046e-05	0.000569111	2.56439
tetur09g06700	Alpha/Beta hydrolase fold	-2.21812	14.501	-4.25944	0.000594832	0.00457998	-0.513784
tetur26g01230	phosphatidylethanolamine-binding protein	-2.21983	10.9952	-5.03936	0.000119598	0.00149249	1.08538
tetur14g01700	Immunoglobulin E-set	-2.33156	13.1102	-4.16127	0.000730609	0.00531712	-0.717778
tetur12g00590	C-factor	-2.37943	9.16368	-16.0966	2.49537e-11	8.69887e-08	16.0013
tetur14g03160	Hypothetical protein	-2.70758	7.8469	-5.86991	2.3369e-05	0.000505205	2.72036
tetur11g04810	phytoene dehydrogenase	-2.91285	9.61735	-5.99828	1.83024e-05	0.000428861	2.96526
tetur23g00860	Cathepsin L	-2.93062	10.7007	-12.2268	1.50209e-09	1.19861e-06	12.2219
tetur09g06670	protein midA homolog; mitochondrial precursor	-2.98645	16.0616	-3.86821	0.00135399	0.00819448	-1.328
tetur11g05720	Lipase/lipooxygenase; PLAT/LH2	-2.99315	13.6092	-9.22498	8.08827e-08	1.33011e-05	8.36342
tetur06g02580	Cathepsin B	-3.01289	8.90747	-6.27118	1.09678e-05	0.0002902	3.47834
tetur06g03000	Hypothetical protein	-3.04177	12.3517	-10.4031	1.52568e-08	5.15634e-06	9.99448
tetur14g03170	Hypothetical protein	-3.18293	8.50613	-11.9982	1.97735e-09	1.25328e-06	11.9606
tetur11g05730	PLAT/LH2 domain	-3.279	13.2541	-9.3157	7.07572e-08	1.28135e-05	8.49492
tetur06g03350	Apolipoprotein D	-3.35618	10.4897	-7.57515	1.0923e-06	6.54694e-05	5.78439
* T. urticae IDs can be accessed at the ORCAE database (Sterck et al. 2012, doi: 10.1038/nmeth.2242) available at http://bioinformatics.psb.ugent.be/orcae/overview/Tetur

## Sheet: cotton
Table S1 - Differential gene expression analysis of the different T. urticae host plant populations. Differentially expressed genes (absolute log2FC ≥ 0.585 and Benjamini-Hochberg adjusted p-value < 0.05) between adult T. urticae females of the cotton (Gossypium hirsutum) population compared to adult T. urticae females of the parental population on common bean (Phaseolus vulgaris)
T.urticae gene ID*	description	log2 FC	AveExpr	t	P.Value	adj.P.Val	B
tetur07g06410	Cytochrome P450 - CYP392A1	7.5996	9.00597	19.9104	9.58512e-13	2.89785e-09	19.1029
tetur06g02580	Cathepsin B	7.31601	8.90747	13.1877	4.94647e-10	2.22495e-07	13.3469
tetur05g01720	conserved secreted protein 1	5.47858	9.18875	16.3769	1.91991e-11	1.78475e-08	16.4106
tetur14g03170	Hypothetical protein	5.35927	8.50613	17.4954	7.00934e-12	8.14486e-09	17.3321
tetur08g06780	Hypothetical protein	5.17287	7.35057	23.6699	6.50304e-14	4.53392e-10	21.3757
tetur31g01890	Hypothetical protein	5.04356	9.80291	10.5165	1.30924e-08	3.04267e-06	10.1494
tetur23g00050	Cathepsin L	4.81113	9.8373	15.015	7.13918e-11	4.97744e-08	15.1878
tetur31g00700	Cathepsin L	4.79982	10.4989	11.6333	3.09342e-09	9.70016e-07	11.5684
tetur06g02590	Serine protease homologue	4.53738	10.0914	13.8043	2.51231e-10	1.29747e-07	13.996
tetur31g00680	Apolipoprotein D precursor	4.53156	12.8063	13.4099	3.86321e-10	1.85754e-07	13.5843
tetur23g00880	Cathepsin L	4.3664	12.2724	18.8011	2.32177e-12	4.04684e-09	18.324
tetur06g02780	Hypothetical protein	4.29529	9.08654	12.3643	1.2759e-09	4.94197e-07	12.4314
tetur02g13950	Hypothetical protein	4.14373	8.85613	14.2134	1.62542e-10	9.44366e-08	14.4106
tetur14g03160	Hypothetical protein	4.05483	7.8469	7.61296	1.02513e-06	7.64404e-05	5.79038
tetur03g08840	Type II Keratin; homologue of keratin 78	3.78835	14.56	19.0958	1.82707e-12	3.63951e-09	18.5364
tetur06g01610	Calycin-like	3.63362	10.169	12.0869	1.77628e-09	6.3509e-07	12.1097
tetur03g08010	Cathepsin B	3.59752	13.4363	10.2916	1.77556e-08	3.86033e-06	9.84787
tetur09g04730	Apolipoprotein D precursor	3.54165	9.50121	11.1087	6.00626e-09	1.58021e-06	10.9176
tetur08g06760	Hypothetical protein	3.48438	11.497	10.7604	9.45941e-09	2.27417e-06	10.4703
tetur06g03350	Apolipoprotein D	3.48418	10.4897	6.81049	4.10801e-06	0.00020099	4.38977
tetur06g03070	Calycin-like	3.41136	8.72659	10.8493	8.41483e-09	2.05853e-06	10.5857
tetur01g16473	Peptidase C1A, papain C-terminal	3.37179	7.75306	7.28175	1.79908e-06	0.000120608	5.22325
tetur03g10063	Small Secreted Protein; Family B	3.36927	11.4639	17.9051	4.91712e-12	6.85643e-09	17.6526
tetur04g07050	sorbitol dehydrogenase	3.23815	11.4248	11.6237	3.13043e-09	9.70016e-07	11.5567
tetur08g06770	Cathepsin B-like	3.18244	7.65318	11.7063	2.82609e-09	9.16441e-07	11.6567
tetur16g03380	Serine protease homologue	2.96352	10.2452	14.923	7.83104e-11	5.19981e-08	15.1009
tetur06g02610	Legumain	2.91291	7.14398	10.2818	1.79949e-08	3.86033e-06	9.83461
tetur09g04720	Apolipoprotein D precursor	2.88496	10.4499	11.2102	5.27276e-09	1.41391e-06	11.0456
tetur06g03360	Apolipoprotein D precursor	2.82303	9.44457	6.19662	1.2602e-05	0.000422367	3.25731
tetur06g03030	Calycin-like	2.64247	8.20678	11.2876	4.777e-09	1.33221e-06	11.1426
tetur02g13940	Hypothetical protein	2.54396	6.80008	16.0737	2.54996e-11	2.14893e-08	16.1484
tetur31g01900	Protein of unknown function DUF388; OB-fold	2.51939	11.7873	8.11739	4.47384e-07	4.587e-05	6.62503
tetur16g03330	Serine protease homologue	2.51743	9.51214	8.84132	1.43883e-07	1.89274e-05	7.76339
tetur06g02570	Cathepsin B-like	2.51153	7.57835	8.86375	1.39053e-07	1.86439e-05	7.79757
tetur03g09997	Peptidase C1A, papain C-terminal	2.50231	10.5352	7.07961	2.55424e-06	0.000151793	4.86957
tetur14g03560	Hypothetical protein	2.48379	8.11166	10.9495	7.3821e-09	1.83814e-06	10.7147
tetur04g02350	UDP-glycosyltransferase; teturUGT13	2.47292	9.69078	11.2351	5.1077e-09	1.39651e-06	11.0769
tetur06g03340	Apolipoprotein D precursor	2.46961	9.99724	5.99167	1.85334e-05	0.000540648	2.86763
tetur06g02930	Peptidase C1A; papain C-terminal	2.42404	11.9474	8.99577	1.13872e-07	1.63694e-05	7.9975
tetur06g02130	Apolipoprotein D	2.40882	11.9511	8.29107	3.38799e-07	3.84083e-05	6.90442
tetur16g03470	Serine protease homologue	2.18151	11.1176	10.0284	2.55284e-08	5.39346e-06	9.48782
tetur03g04460	Fibronectin; type III-like fold	2.18125	11.6083	5.54915	4.34481e-05	0.000932305	2.00736
tetur03g08030	Cathepsin B	2.1491	12.2111	12.1301	1.6864e-09	6.1882e-07	12.1603
tetur22g01530	lethal	2.13934	9.9745	8.50389	2.42219e-07	2.91164e-05	7.24132
tetur06g03380	Hypothetical protein	2.12664	9.97557	8.11995	4.45541e-07	4.587e-05	6.62918
tetur09g01950	ABC-transporter; class G	2.12138	11.7898	16.0451	2.61989e-11	2.14893e-08	16.1233
tetur06g03370	Apolipoprotein D	2.07819	7.92565	4.9802	0.000134781	0.00202064	0.866568
tetur31g01850	Hypothetical protein	2.05692	12.4722	7.09061	2.50564e-06	0.000151793	4.88896
tetur06g03020	Lipocalin family conserved site	2.05514	10.6242	10.2937	1.77039e-08	3.86033e-06	9.85076
tetur09g01190	fatty acid ELOngation family member	2.0379	6.64604	8.5443	2.27406e-07	2.75735e-05	7.30463
tetur32g01250	UDP-glycosyltransferase; teturUGT75	2.01485	10.6102	14.0101	2.0153e-10	1.08082e-07	14.2061
tetur20g01790	intradiol ring-cleavage dioxygenase	1.98033	14.0215	9.50195	5.39214e-08	9.51747e-06	8.74399
tetur10g00740	PREDICTED: similar to lipase 1	1.97972	9.31411	7.5088	1.22157e-06	8.82568e-05	5.61368
tetur31g00720	3-Pan module Cell Surface Protein; antigen-2	1.87904	9.75699	11.3191	4.58925e-09	1.30597e-06	11.1819
tetur38g00060	Chitin binding protein; peritrophin-A	1.86461	11.3591	5.35144	6.41018e-05	0.00122279	1.61508
tetur33g00340	Hypothetical protein	1.86385	12.4697	7.84174	7.00962e-07	6.48445e-05	6.17325
tetur03g07950	Cathepsin B	1.83281	10.9111	7.21858	2.00615e-06	0.000129508	5.11334
tetur04g05540	ABC-transporter; class C	1.79651	8.35637	7.05148	2.68307e-06	0.00015524	4.8199
tetur06g02940	Calycin-like	1.76649	11.7533	5.40642	5.75028e-05	0.00113948	1.72463
tetur08g03000	UDP-glycosyltransferase; teturUGT42	1.74381	6.42741	22.0629	1.948e-13	9.05432e-10	20.4675
tetur31g00920	Apolipoprotein D precursor	1.70172	12.4761	4.61791	0.000282532	0.00328576	0.123145
tetur31g00810	Hypothetical protein	1.65131	8.87595	3.07479	0.0072288	0.0323072	-3.0834
tetur47g00120	Hypothetical protein	1.64835	10.2014	6.10983	1.48278e-05	0.000466726	3.09298
tetur16g02900	Small Secreted Protein with 6 Cys residues	1.64779	8.70592	6.59376	6.0665e-06	0.000258689	3.99597
tetur11g06400	hypothetical protein	1.64321	15.6509	9.03228	1.0779e-07	1.62656e-05	8.0524
tetur20g01400	Hypothetical protein	1.61619	12.9011	6.62878	5.69369e-06	0.000245039	4.06005
tetur22g02120	Lipase/lipooxygenase; PLAT/LH2	1.61299	12.4202	5.89373	2.2329e-05	0.000608115	2.67943
tetur31g00900	Apolipoprotein D precursor	1.60132	14.2003	4.39926	0.00044436	0.00442582	-0.330355
tetur20g01390	Hypothetical protein	1.59742	12.3708	5.91514	2.14356e-05	0.000590708	2.72067
tetur16g03200	PREDICTED: similar to adenylate cyclase	1.57114	8.16212	8.04951	4.99246e-07	4.93722e-05	6.51473
tetur640g00020	trans-1;2-dihydrobenzene-1;2-diol dehydrogenase	1.55992	9.92699	9.07682	1.0083e-07	1.56219e-05	8.11915
tetur11g06390	hypothetical protein	1.55836	15.568	9.6362	4.44352e-08	8.31797e-06	8.93677
tetur11g05100	adenylate cyclase	1.52934	9.52334	5.54141	4.41107e-05	0.000943125	1.99209
tetur05g04710	Legumain	1.51344	9.80127	8.55941	2.22114e-07	2.74085e-05	7.32824
tetur31g01880	Apolipoprotein D precursor	1.51179	6.37781	16.6352	1.51319e-11	1.59809e-08	16.6297
tetur08g02630	Small Secreted Protein; family C	1.4995	11.6515	3.53554	0.0027362	0.0159973	-2.1349
tetur10g04150	lipoprotein	1.4994	9.33781	6.98355	3.02296e-06	0.0001674	4.69948
tetur08g07930	Cytochrome P450 pseudogene	1.49561	9.82433	5.51377	4.65629e-05	0.000979297	1.9375
tetur10g00320	PREDICTED: rCG19957-like	1.48857	8.84294	4.8935	0.000160696	0.00225589	0.689711
tetur30g01750	PREDICTED: hypothetical protein	1.48344	8.34485	4.8172	0.000187723	0.00252421	0.533486
tetur06g03420	Hypothetical protein	1.48326	7.94966	6.7638	4.46543e-06	0.000210358	4.30551
tetur11g06110	adenylate cyclase	1.46968	9.2978	4.9692	0.000137815	0.0020479	0.84417
tetur20g00580	Nose resistant-to-fluoxetine protein; N-terminal	1.46441	11.0598	11.507	3.6212e-09	1.07434e-06	11.4142
tetur10g05772	Serine proteases, trypsin family, histidine active site	1.46153	8.62554	8.38124	2.93699e-07	3.41278e-05	7.04789
tetur22g02130	Lipase/lipooxygenase; PLAT/LH2	1.46001	10.2593	8.34715	3.09958e-07	3.57195e-05	6.99379
tetur01g12410	Hypothetical protein	1.45103	7.25934	8.02251	5.21591e-07	5.10971e-05	6.47069
tetur02g13990	Hypothetical protein	1.44796	10.1214	9.61176	4.6022e-08	8.44383e-06	8.90183
tetur16g02380	Carboxyl/cholinesterase	1.44242	13.6131	4.76557	0.000208614	0.00270596	0.427502
tetur07g02860	trans-1;2-dihydrobenzene-1;2-diol dehydrogenase	1.43505	13.4163	12.4674	1.12996e-09	4.63416e-07	12.5492
tetur17g02920	Phytanoyl-CoA dioxygenase	1.41875	6.83511	6.13009	1.42741e-05	0.000456003	3.13144
tetur19g03360	Intradiol ring-cleavage dioxygenase, core	1.41271	13.4735	5.12376	0.000100921	0.00166262	1.15776
tetur02g13830	Hypothetical protein	1.41012	11.4268	9.03675	1.0707e-07	1.62656e-05	8.05911
tetur06g03100	Apolipoprotein D	1.40889	10.8626	6.95662	3.16986e-06	0.00017132	4.65157
tetur01g05730	Apolipoprotein D precursor	1.40124	12.2787	5.97435	1.91524e-05	0.000549822	2.83444
tetur10g00090	Glycine-rich secreted protein	1.39642	16.2922	6.39825	8.67113e-06	0.000329456	3.63506
tetur03g04470	Fibronectin; type III-like fold	1.36977	11.5292	8.85018	1.41955e-07	1.88516e-05	7.77689
tetur39g00610	Hypothetical protein	1.35264	7.71109	5.46702	5.10355e-05	0.00104193	1.84497
tetur28g01250	intradiol ring-cleavage dioxygenase	1.3196	12.5936	4.80483	0.000192524	0.00257387	0.508119
tetur11g05230	Apolipoprotein D	1.29895	10.8008	3.33875	0.00414793	0.0215897	-2.54288
tetur10g02620	Myosin regulatory light chain 2; smooth muscle isoform	1.28917	11.8327	6.6945	5.05697e-06	0.000229688	4.17985
tetur05g00320	delta	1.27927	12.4747	3.21285	0.005409	0.0261613	-2.80185
tetur04g07690	Domain of unknown function DUF3421	1.27012	15.8404	7.75486	8.0917e-07	6.77109e-05	6.0287
tetur01g12620	Wannes-Thomas Secreted Protein 1	1.26773	8.71149	5.74385	2.97704e-05	0.000730841	2.38897
tetur07g01660	PREDICTED: hypothetical protein	1.26542	16.5611	9.41736	6.09751e-08	1.04968e-05	8.62142
tetur01g10810	Carboxyl/cholinesterase	1.22916	10.4208	3.70856	0.00189742	0.0123865	-1.77406
tetur27g00090	cuticular protein analogous to peritrophins 1-A	1.22585	9.36698	5.10947	0.000103858	0.00169777	1.12887
tetur21g02620	Hypothetical protein	1.21836	13.2186	7.41189	1.43986e-06	0.000100892	5.44791
tetur01g12220	Cysteine-rich secretory protein, allergen V5/Tpx-1-related	1.21535	11.5484	5.10219	0.000105388	0.00172076	1.11415
tetur238g00010	Fibroin	1.2108	13.2039	5.68933	3.30786e-05	0.000776269	2.28258
tetur11g00550	GG23423	1.20544	11.1923	4.26811	0.000584144	0.00545932	-0.603658
tetur17g02090	TMP21-related	1.19591	12.0895	4.925	0.000150737	0.00216688	0.754038
tetur04g03460	Phosphomevalonate kinase	1.19569	9.54968	5.89869	2.21188e-05	0.000605941	2.68899
tetur05g05080	solute carrier organic anion transporter; putative	1.19209	11.5727	6.80167	4.17314e-06	0.000202754	4.37388
tetur06g03000	Hypothetical protein	1.18966	12.3517	3.5236	0.00280622	0.0162702	-2.15975
tetur08g06540	hypothetical protein IscW_ISCW011638	1.18672	12.224	6.54653	6.61011e-06	0.000273825	3.90927
tetur23g00760	Hypothetical protein	1.18436	6.97136	14.0827	1.86576e-10	1.04065e-07	14.2795
tetur16g03190	Serine protease homologue	1.18069	9.4095	3.15883	0.00605992	0.0285246	-2.91235
tetur09g92864	hypothetical protein	1.17993	7.4492	4.90473	0.000157071	0.00222807	0.71265
tetur02g14000	Hypothetical protein	1.17746	11.0324	9.00798	1.11799e-07	1.63694e-05	8.01588
tetur01g04020	Fibroin	1.17732	12.5283	6.23205	1.17959e-05	0.000403143	3.3241
tetur06g00950	cysteine and glycine-rich protein 3	1.16657	12.3476	6.66502	5.33288e-06	0.000235215	4.12618
tetur03g05190	Cytochrome P450 - CYP388A1	1.15993	8.16864	4.77921	0.000202872	0.0026537	0.45553
tetur15g01990	ABC-transporter; class A;	1.15299	11.6495	5.58577	4.04512e-05	0.000891077	2.07949
tetur17g02910	phytanoyl-CoA dioxygenase domain-containing protein 1	1.15036	13.801	3.98681	0.00105432	0.00814935	-1.19184
tetur06g03550	Apolipoprotein D precursor	1.15013	6.98321	3.3031	0.00447202	0.0227508	-2.61639
tetur17g03900	mannose-6-phosphate isomerase	1.15013	12.6065	3.70675	0.0019047	0.0124166	-1.77785
tetur11g04990	Nuclear hormone receptor, ligand-binding domain	1.1484	10.0489	9.12237	9.41977e-08	1.47583e-05	8.18716
tetur08g91626	hypothetical protein	1.14407	11.7444	3.82934	0.00146982	0.0103931	-1.52147
tetur21g01170	dimethylaniline monooxygenase	1.1435	7.49675	3.29707	0.00452926	0.0229408	-2.6288
tetur06g02700	PREDICTED: similar to acid alpha glucosidase	1.14162	12.7866	6.16216	1.34411e-05	0.000439958	3.19219
tetur05g05750	Chitin binding protein; peritrophin-A	1.13836	9.4485	4.24084	0.000618432	0.0056547	-0.66059
tetur23g01600	secreted salivary gland peptide; putative	1.13797	11.4798	6.19233	1.27035e-05	0.000423775	3.24921
tetur47g00140	Hypothetical protein	1.13177	9.30795	6.58326	6.18325e-06	0.00026127	3.97671
tetur08g07660	AMOP	1.12897	12.2326	5.63084	3.70531e-05	0.000837388	2.16805
tetur01g11270	phytoene dehydrogenase	1.12727	11.1517	3.65178	0.0021396	0.013475	-1.89265
tetur28g02460	medium-chain specific acyl-CoA dehydrogenase; mitochondrial precursor	1.12013	13.4752	7.8177	7.29293e-07	6.5295e-05	6.13335
tetur30g01790	hypothetical protein	1.11951	12.8159	5.57231	4.15272e-05	0.00090761	2.05299
tetur11g05990	ABC-transporter; class C	1.10867	10.1064	6.6811	5.18049e-06	0.000233022	4.15547
tetur16g02410	Carboxyl/cholinesterase	1.10863	10.2716	4.21173	0.000657279	0.00590535	-0.721371
tetur01g16320	Peptidase S1, trypsin family, active site	1.09087	12.2535	6.73398	4.71061e-06	0.000216781	4.25152
tetur06g02910	p21-activated protein kinase-interacting protein 1-like	1.09086	11.2625	8.68922	1.81651e-07	2.30267e-05	7.52989
tetur02g01780	PREDICTED: similar to neutral endopeptidase 24.11	1.08531	8.00993	7.00814	2.89502e-06	0.000163022	4.74314
tetur06g03440	Apolipoprotein D	1.07954	9.04771	4.06512	0.00089409	0.00724415	-1.02793
tetur06g03090	Apolipoprotein D related protein	1.07228	10.0685	5.26607	7.59377e-05	0.00138054	1.44428
tetur06g04210	CCAAT/enhancer binding protein alpha	1.05954	8.77842	6.51441	7.00856e-06	0.000283268	3.85013
tetur16g02260	KOG3882-like protein	1.05658	13.0817	6.75347	4.54883e-06	0.000212137	4.28681
tetur09g02530	3 hydroxysteroid dehydrogenase; putative	1.05586	7.37425	6.96494	3.12368e-06	0.000169616	4.66639
tetur32g01910	Hypothetical protein	1.05073	15.8577	5.49485	4.83224e-05	0.0010012	1.90008
tetur04g05450	Myc-type, basic helix-loop-helix (bHLH) domain	1.04808	9.69419	9.34202	6.8076e-08	1.15762e-05	8.51152
tetur03g04330	PREDICTED: similar to F55A4.8a	1.04645	10.0821	5.31608	6.87541e-05	0.00128513	1.54445
tetur02g01240	Bicarbonate transporter; eukaryotic	1.04454	10.9269	4.36597	0.000476249	0.00467006	-0.399655
tetur14g01900	Basic-leucine zipper (bZIP) transcription factor	1.03323	12.9567	8.492	2.46766e-07	2.94095e-05	7.22266
tetur10g02650	Myosin regulatory light chain 2; smooth muscle isoform	1.0323	13.3621	5.27745	7.42382e-05	0.00135672	1.46709
tetur06g04530	Hypothetical protein	1.03185	10.5026	6.28617	1.06666e-05	0.000378463	3.42578
tetur32g00200	myosin alkali light chain	1.0283	13.635	4.71565	0.000231083	0.0029029	0.324807
tetur09g00270	elongase; putative	1.01431	8.51959	5.00641	0.000127824	0.00194121	0.919888
tetur09g04630	Hypothetical protein	1.01001	14.168	9.17703	8.68401e-08	1.39184e-05	8.26843
tetur16g01170	Hypothetical protein	1.00896	11.9452	5.67349	3.4109e-05	0.000786685	2.25162
tetur31g01320	GNS1/SUR4 membrane protein	1.00817	9.08166	4.58548	0.000302078	0.00341256	0.0560844
tetur17g01700	GF11309	1.00711	12.8277	5.70256	3.22424e-05	0.000765795	2.30843
tetur19g03230	Putative Cell Adhesion / Receptor Protein	1.00677	11.4713	5.92495	2.10385e-05	0.000583222	2.73956
tetur32g01210	eukaryotic initiation factor 4E binding	0.99839	13.6228	3.29371	0.00456147	0.023037	-2.63572
tetur07g06710	PREDICTED: sodium-dependent glucose transporter 1-like; partial	0.98932	10.9484	5.97763	1.90333e-05	0.000548348	2.84074
tetur35g00430	Hypothetical protein	0.988197	11.0133	8.31805	3.24588e-07	3.70988e-05	6.94747
tetur12g00880	cysteine and glycine-rich protein 3	0.988132	11.2227	5.81737	2.58434e-05	0.000673632	2.53181
tetur12g02110	conserved unknown protein	0.984691	8.78514	6.57381	6.29018e-06	0.000264986	3.95939
tetur03g01780	PREDICTED: similar to AGAP005450-PA	0.980035	9.02992	8.10817	4.54085e-07	4.62172e-05	6.61008
tetur21g00940	P-loop containing nucleoside triphosphate hydrolase	0.978667	8.08232	7.88231	6.55742e-07	6.19542e-05	6.24038
tetur24g00890	kelch-like 18	0.973636	8.0156	4.97227	0.000136963	0.0020404	0.850408
tetur04g05990	innexin; putative	0.970713	9.0471	5.75294	2.92533e-05	0.000725815	2.40666
tetur01g15480	Hypothetical protein	0.969776	10.7501	6.2275	1.18965e-05	0.000405585	3.31553
tetur21g01600	Alpha/Beta hydrolase fold	0.968935	8.53049	5.09605	0.000106696	0.00173804	1.10173
tetur39g00530	Small Secreted Protein; family C	0.964274	16.5223	5.57294	4.1476e-05	0.00090761	2.05424
tetur06g03540	Legumain	0.963408	6.59271	4.73388	0.000222606	0.00283731	0.362323
tetur10g00220	Wnt inhibitory factor (WIF)-1	0.962821	9.06555	6.05186	1.65388e-05	0.00050685	2.98266
tetur02g02090	Hypothetical protein	0.961605	13.2089	4.25956	0.000594678	0.00552444	-0.621499
tetur26g00440	lipophorin receptor	0.957138	10.7896	6.02761	1.73142e-05	0.000519138	2.93637
tetur12g02260	Hypothetical protein	0.95481	9.28017	4.33421	0.000508845	0.00488731	-0.465822
tetur06g02360	Diacylglycerol/phorbol-ester binding	0.954459	11.7074	5.17889	9.03653e-05	0.00154418	1.26902
tetur18g03370	archease	0.954348	11.5373	8.21396	3.83132e-07	4.14139e-05	6.78087
tetur01g00610	Hypothetical protein	0.95129	9.47347	5.374	6.13038e-05	0.00118802	1.66008
tetur08g06890	solute carrier family 17	0.949748	8.63691	3.67986	0.00201619	0.0129267	-1.83402
tetur01g13460	Cystatin domain	0.949238	13.4672	4.80848	0.000191095	0.00256049	0.515601
tetur05g05250	Glutathione S-transferase; class mu	0.942448	10.189	5.48728	4.90448e-05	0.00101316	1.88511
tetur30g01300	S-adenosyl-L-methionine-dependent methyltransferase	0.939866	10.4932	3.47988	0.00307812	0.017363	-2.25061
tetur02g10940	glucosylceramidase precursor	0.939256	12.4218	5.35426	6.37449e-05	0.00121928	1.62071
tetur01g03220	Small Secreted Protein; Family D; hypothetical	0.93889	12.2632	6.88983	3.56735e-06	0.000187379	4.53228
tetur10g02360	sialin	0.931854	8.19553	2.98467	0.00872822	0.0370717	-3.26554
tetur01g01710	Hypothetical protein	0.931028	14.323	4.88252	0.000164324	0.00229363	0.667268
tetur09g03190	Hypothetical protein	0.930798	11.7945	7.22192	1.9946e-06	0.000129361	5.11916
tetur05g06720	Filamin A; Cheerio orthologue	0.929897	11.1458	7.79113	7.62008e-07	6.6349e-05	6.08917
tetur17g00770	Leucine-rich repeat domain, L domain-like	0.929264	8.77125	4.51745	0.000347696	0.00373301	-0.0848368
tetur11g06368	hypothetical protein	0.928358	9.64805	4.09147	0.000845915	0.00699611	-0.972799
tetur02g13090	Atypical dual specificity phosphatase, subfamily A	0.927639	10.155	7.91233	6.2425e-07	5.96201e-05	6.28991
tetur16g01270	Synaphin	0.927234	8.85109	7.48777	1.26581e-06	9.09815e-05	5.57781
tetur08g06030	Legumain	0.926896	13.2079	5.52771	4.5309e-05	0.000958708	1.96505
tetur42g00180	Zinc finger, CCHC-type	0.923216	7.89443	6.00883	1.79404e-05	0.000530003	2.90047
tetur02g02310	Cold-shock protein, DNA-binding	0.921628	11.7045	6.01748	1.76489e-05	0.000525846	2.91703
tetur03g02710	Scramblase	0.920473	11.4952	4.16943	0.000718215	0.00629986	-0.809776
tetur26g02760	Hypothetical protein	0.915818	11.4805	3.31519	0.00435936	0.0223563	-2.59147
tetur26g00550	UNCoordinated family member	0.914596	11.1171	6.90428	3.47714e-06	0.000185058	4.55815
tetur24g01580	GK19605	0.909426	10.2523	9.45971	5.733e-08	9.99263e-06	8.68289
tetur10g00300	Hypothetical protein	0.908547	7.18856	4.3922	0.000450937	0.00447854	-0.345049
tetur04g01060	Fatty acyl-CoA reductase	0.907669	7.85936	4.04497	0.000932812	0.00745395	-1.07011
tetur09g06570	Filamin C; short isoform	0.905273	9.64252	7.11084	2.41873e-06	0.000149234	4.92459
tetur01g04280	gamma-sarcoglycan	0.904424	8.88548	8.90666	1.30282e-07	1.7933e-05	7.8628
tetur07g01280	Small Secreted Protein; family C	0.902193	12.4347	4.80314	0.000193191	0.00257785	0.504642
tetur04g05980	Apolipoprotein D precursor	0.901669	15.0342	5.08144	0.000109879	0.00177232	1.07213
tetur02g13890	Hypothetical protein	0.901633	11.5854	3.64781	0.00215764	0.0135584	-1.90093
tetur05g02860	MIF4-like; type 1/2/3	0.900196	8.85046	5.53549	4.46247e-05	0.000949996	1.9804
tetur10g04690	Hormone Receptor 38 (1)	0.898942	9.655	6.0839	1.5569e-05	0.000484586	3.0437
tetur17g01720	Hypothetical protein	0.898874	10.5568	5.54515	4.37891e-05	0.000937935	1.99947
tetur09g01960	ABC-transporter; class G	0.897654	12.3727	5.92926	2.08664e-05	0.000581921	2.74786
tetur22g00090	Adenylyl cyclase class-4/guanylyl cyclase, conserved site	0.896932	9.33676	6.19711	1.25904e-05	0.000422367	3.25824
tetur11g01520	cysteine and glycine-rich protein 3	0.896429	12.1032	6.68307	5.16212e-06	0.000232947	4.15906
tetur36g00190	PREDICTED: similar to CG18549 CG18549-PA	0.895468	6.95329	3.06987	0.00730374	0.0325586	-3.09339
tetur04g07830	Hypothetical protein	0.890247	8.53639	9.01991	1.09812e-07	1.62895e-05	8.03382
tetur17g00600	PREDICTED: similar to Band 4.1-like protein 3	0.889044	8.94554	9.16327	8.86333e-08	1.40444e-05	8.24801
tetur04g05460	10-formyltetrahydrofolate dehydrogenase	0.888088	9.72847	3.06624	0.00735954	0.0327165	-3.10075
tetur04g06760	GE11520	0.886779	10.4503	10.3486	1.64274e-08	3.7077e-06	9.92486
tetur02g09590	AP-1 complex subunit sigma-2	0.886649	9.73253	6.54264	6.65711e-06	0.000273825	3.90211
tetur01g00130	cuticle protein	0.886557	13.4622	2.7993	0.012827	0.0490566	-3.63522
tetur07g00020	PREDICTED: similar to AGAP008646-PA	0.884493	9.76832	5.8113	2.61463e-05	0.000678591	2.52004
tetur49g00080	Armadillo-type fold	0.884452	12.0157	4.63929	0.000270357	0.00317598	0.167319
tetur10g00310	Legumain	0.882961	12.4107	4.90646	0.000156518	0.0022225	0.716194
tetur06g02140	apolipoprotein D	0.881416	11.0309	3.7111	0.00188725	0.012348	-1.76875
tetur16g03500	Cytochrome P450 - CYP392A7	0.880175	9.93612	5.37073	6.17018e-05	0.0011908	1.65356
tetur17g00750	Carboxyl/cholinesterase	0.876676	6.60231	14.5233	1.17704e-10	7.13595e-08	14.7164
tetur29g00810	up	0.87627	12.5608	3.69779	0.00194115	0.0125895	-1.79657
tetur14g02400	Hypothetical protein	0.873122	11.9461	5.82422	2.55059e-05	0.000668522	2.54509
tetur22g00690	minor tail protein gp26-like	0.872198	8.1246	3.65648	0.00211844	0.0134088	-1.88284
tetur04g06260	secreted salivary gland peptide; putative	0.87018	8.98203	4.68455	0.000246321	0.00300291	0.260719
tetur27g01180	Hypothetical protein	0.870178	7.91467	8.12666	4.40749e-07	4.58642e-05	6.64005
tetur07g01320	phosphatidylcholine-sterol acyltransferase	0.868715	10.9737	6.66352	5.34733e-06	0.000235215	4.12345
tetur08g02600	Hypothetical protein	0.867295	6.61851	3.33757	0.00415821	0.0216191	-2.5453
tetur05g04420	choline/ethanolaminephosphotransferase 1	0.865783	10.7785	4.23969	0.000619912	0.00566081	-0.662976
tetur05g08680	Hypothetical protein	0.862199	10.8954	7.08415	2.53407e-06	0.000151793	4.87757
tetur13g01200	Complement control module	0.857813	9.33014	5.12104	0.000101473	0.00166659	1.15227
tetur19g02930	glutamate decarboxylase 1	0.854679	9.434	6.03057	1.72174e-05	0.000519138	2.94203
tetur05g04720	secreted salivary gland peptide; putative	0.853833	11.2424	3.93576	0.00117411	0.00879733	-1.29872
tetur06g04450	Glycine-rich secreted protein	0.85245	8.27046	3.66582	0.00207697	0.0132424	-1.86333
tetur03g05000	Cytochrome P450 - CYP392D3	0.851064	10.367	2.79806	0.0128599	0.0491013	-3.63766
tetur02g02330	lethal	0.849226	11.5187	4.09706	0.000836045	0.00696325	-0.961115
tetur02g90632	hypothetical protein	0.849222	7.43227	4.5058	0.000356187	0.00380096	-0.109
tetur22g01550	baboon; TGFbeta receptor type I	0.847076	7.61347	8.67425	1.85895e-07	2.33525e-05	7.50673
tetur03g09640	Hypothetical protein	0.846616	13.9795	5.81787	2.58186e-05	0.000673632	2.53278
tetur19g03300	stearoyl-CoA desaturase	0.846187	10.7323	5.08409	0.000109294	0.00176797	1.07751
tetur29g01060	Alpha-hydroxy acid dehydrogenase; FMN-dependent	0.844507	12.6136	5.86043	2.37965e-05	0.000636889	2.61514
tetur06g01830	Nose resistant-to-fluoxetine protein, N-terminal	0.843901	8.20625	7.82256	7.2347e-07	6.5295e-05	6.14143
tetur01g04940	Hypothetical protein	0.842629	10.6966	5.54076	4.41667e-05	0.000943125	1.99081
tetur37g00350	Calcium-binding mitochondrial aspartate-glutamate transporter; solute carrier family 25; member 12	0.841712	12.0003	7.78144	7.74326e-07	6.6349e-05	6.07302
tetur17g03560	Hypothetical protein	0.840994	9.67058	5.58866	4.02232e-05	0.000888358	2.08519
tetur05g02840	PREDICTED: similar to eukaryotic translation initiation factor 4 gamma; 2	0.839246	10.6682	6.26219	1.11525e-05	0.000393554	3.38078
tetur01g11240	amino acid transporter	0.838381	9.86352	4.51736	0.000347761	0.00373301	-0.0850239
tetur17g03910	peptidase M28	0.834799	8.51835	3.69635	0.00194705	0.0126043	-1.79957
tetur19g00300	AT-rich interactive domain-containing protein 5B	0.834037	8.27119	4.78791	0.000199295	0.00262911	0.473397
tetur03g04050	Thioredoxin-like protein 4A	0.833596	8.66355	5.5213	4.58812e-05	0.000969345	1.95238
tetur02g13400	CG18265	0.833389	8.28861	8.97615	1.17289e-07	1.66885e-05	7.96793
tetur06g03040	Cathepsin L	0.83251	13.5009	3.69918	0.00193544	0.0125758	-1.79366
tetur06g02670	Calycin-like	0.832326	7.3765	4.11151	0.000811032	0.00682089	-0.930869
tetur30g01000	PaXiLlin homolo family member	0.825655	9.68624	4.73419	0.000222466	0.00283731	0.362955
tetur17g00360	Carboxyl/cholinesterase; incomplete	0.825571	10.1342	4.10186	0.000827643	0.00693132	-0.951058
tetur27g01360	regulator of G-protein signaling 7	0.822169	8.3094	7.5697	1.10236e-06	8.09015e-05	5.71718
tetur40g00030	Major facilitator superfamily; general substrate transporter	0.821419	7.35195	3.18946	0.00568191	0.0271145	-2.84974
tetur01g12910	CDK5 and ABL1 enzyme substrate 1/2	0.819177	12.0112	3.30181	0.00448423	0.0227671	-2.61905
tetur05g04320	alpha/beta hydrolase fold protein	0.818246	11.5343	4.87388	0.000167239	0.00232038	0.649594
tetur22g02530	Lipase/lipooxygenase; PLAT/LH2	0.81547	15.276	4.93649	0.000147261	0.00213607	0.777494
tetur17g01130	band 7 protein	0.815096	13.0392	3.84713	0.00141563	0.0101593	-1.48425
tetur08g05010	Cathepsin B	0.81436	14.6977	6.87502	3.66232e-06	0.000189832	4.50575
tetur07g03130	Hypothetical protein	0.809364	9.3487	6.48875	7.34482e-06	0.000292618	3.80278
tetur02g13040	antigen B membrane protein	0.808947	6.91221	4.37361	0.000468735	0.00460061	-0.383755
tetur30g00250	troponin i	0.808815	11.3587	5.93493	2.06424e-05	0.000578806	2.75876
tetur28g01600	Serine proteases, trypsin family, serine active site	0.802321	11.4524	5.0658	0.000113393	0.00180703	1.04045
tetur18g00230	ABC-transporter; class H	0.801508	7.52653	5.60346	3.90803e-05	0.000871309	2.11428
tetur15g00380	PREDICTED: similar to CG9380 CG9380-PB	0.799447	12.721	4.44125	0.000407219	0.00416282	-0.243039
tetur07g05720	adenosine kinase	0.797299	10.8465	4.48082	0.000375115	0.00393278	-0.160844
tetur19g00930	ras-related protein Rab-32	0.793956	9.08636	7.3868	1.50276e-06	0.000103735	5.40479
tetur23g00860	Cathepsin L	0.792952	10.7007	2.86505	0.0111949	0.0444735	-3.50492
tetur04g06200	secreted salivary gland peptide; putative	0.79217	7.95112	6.98311	3.02531e-06	0.0001674	4.6987
tetur28g01690	mitochondrial carnitine/acylcarnitine carrier protein CACL	0.790548	9.77504	4.32819	0.000515271	0.00493811	-0.478362
tetur08g04830	Alkaline phosphatase-like, alpha/beta/alpha	0.787539	10.1144	7.74201	8.26607e-07	6.77109e-05	6.00722
tetur11g00530	Cytochrome P450 - CYP392A6	0.783421	11.0957	5.02057	0.000124219	0.00190761	0.948669
tetur02g90661	hypothetical protein	0.782952	9.29073	6.76449	4.45993e-06	0.000210358	4.30675
tetur27g01640	Hypothetical protein	0.780136	7.35562	5.90783	2.17363e-05	0.000597812	2.7066
tetur03g05300	ABC-transporter; class H	0.778028	10.7902	5.98451	1.87867e-05	0.000545322	2.85391
tetur08g00470	PREDICTED: similar to adenylate cyclase	0.775572	9.53553	6.56442	6.39842e-06	0.000267124	3.94215
tetur12g00140	Fibroin	0.774465	11.8505	4.64638	0.000266438	0.00315651	0.181962
tetur09g02430	adenylate cyclase; putative	0.773229	11.1522	3.90132	0.0012626	0.009271	-1.37082
tetur114g00010	myosin light chain kinase; smooth muscle	0.772843	8.71589	6.81886	4.04709e-06	0.000199727	4.40486
tetur29g00290	tropomyosin	0.769123	9.70138	5.92373	2.10876e-05	0.000583424	2.73721
tetur14g04020	Peptidase S1A, chymotrypsin-type	0.765739	10.0501	5.01092	0.000126663	0.00193662	0.929062
tetur39g00020	Hypothetical protein	0.763157	8.52525	5.97787	1.90248e-05	0.000548348	2.84119
tetur02g00130	isoamyl acetate-hydrolyzing esterase 1	0.76269	11.9068	7.33612	1.63878e-06	0.000111469	5.31739
tetur29g00700	selenium-dependent glutathione peroxidase	0.76177	11.1739	5.28875	7.25884e-05	0.0013356	1.48975
tetur18g01320	Hypothetical protein	0.76076	10.9789	6.32937	9.84628e-06	0.00036226	3.50664
tetur01g02850	Zinc finger; RING-type	0.755609	8.36075	5.38799	5.96326e-05	0.0011728	1.68796
tetur16g01090	protein kinase C eta type	0.754695	8.512	6.14228	1.39512e-05	0.000448815	3.15455
tetur01g09240	Retinoid X Receptor 2	0.754517	10.9105	5.95753	1.9774e-05	0.000565462	2.80217
tetur09g00370	Cellular retinaldehyde-binding/triple function; C-terminal	0.753836	10.6049	4.30079	0.00054559	0.00516828	-0.535478
tetur04g00750	short chain dehydrogenase	0.752863	13.3117	6.84231	3.88155e-06	0.000196103	4.44704
tetur20g03437	Spt5 transcription elongation factor, N-terminal	0.750195	8.15731	5.61104	3.85076e-05	0.000866048	2.12918
tetur13g00490	beta-lactamase-like protein 2	0.748437	10.4137	7.78411	7.70912e-07	6.6349e-05	6.07747
tetur04g03270	guanine nucleotide-binding protein G	0.748062	7.59292	6.31223	1.01636e-05	0.000370354	3.47459
tetur24g01090	prestin	0.747996	11.8637	5.60605	3.88838e-05	0.000868903	2.11937
tetur27g01690	MFS transporter protein	0.744025	11.1656	4.40463	0.000439422	0.00439122	-0.31918
tetur03g07920	Glutathione S-transferase; delta class	0.743949	14.8631	4.61404	0.000284793	0.00330104	0.115154
tetur10g01970	PREDICTED: similar to solute carrier family 25	0.743153	10.1625	5.3822	6.03184e-05	0.00117798	1.67642
tetur02g01370	glycogen debranching enzyme	0.742391	7.98649	2.94812	0.00941951	0.0390677	-3.33899
tetur08g06120	Hypothetical protein	0.741799	11.2994	8.8957	1.32465e-07	1.7933e-05	7.84616
tetur23g02040	Hypothetical protein	0.739348	11.1657	4.74242	0.000218743	0.00280554	0.379897
tetur07g01480	DNA-directed RNA polymerase III subunit RPC3	0.735999	10.0952	4.78467	0.000200621	0.00263612	0.466734
tetur43g00450	Hypothetical protein	0.735268	10.8308	5.00931	0.000127076	0.00193683	0.925788
tetur43g00430	Hypothetical protein	0.734766	8.5252	7.61915	1.01454e-06	7.64172e-05	5.80084
tetur02g08780	RNA-directed RNA polymerase 3	0.733334	7.78854	4.85059	0.000175361	0.00240344	0.601931
tetur17g02360	Hypothetical protein	0.732426	6.98666	4.07171	0.000881797	0.00717373	-1.01415
tetur01g08370	Leucine-rich repeat domain, L domain-like	0.732183	8.28703	2.9923	0.00859032	0.0366471	-3.25018
tetur418g00010	Pleckstrin homology domain	0.730488	9.23896	6.87696	3.64971e-06	0.000189832	4.50923
tetur39g00350	Apple-like	0.730081	12.2504	5.84142	2.46787e-05	0.000651742	2.57838
tetur02g01980	poly	0.729676	11.033	5.93419	2.06716e-05	0.000578806	2.75733
tetur45g00140	Hypothetical protein	0.728962	6.69091	6.02659	1.73474e-05	0.000519138	2.93443
tetur04g02320	PREDICTED: similar to sodium-dependent phosphate transporter	0.726543	9.79492	3.22401	0.00528332	0.0257499	-2.77896
tetur02g07430	tropomyosin	0.726244	12.1952	3.86968	0.00134978	0.00979793	-1.43704
tetur04g05130	stearoyl-CoA desaturase	0.725369	7.0311	3.14521	0.00623585	0.0290229	-2.94014
tetur16g02390	Carboxyl/cholinesterase	0.724828	7.11016	4.18661	0.0006928	0.0061492	-0.773859
tetur31g01910	Josephin-2	0.723716	11.0684	4.89315	0.000160811	0.00225589	0.68899
tetur07g01190	GNS1/SUR4 membrane protein	0.722663	6.68475	3.16228	0.00601617	0.0284275	-2.90531
tetur24g01290	Hypothetical protein	0.721192	8.43022	6.41873	8.35059e-06	0.00032255	3.67312
tetur19g00040	FERM/acyl-CoA-binding protein; 3-helical bundle	0.720593	8.04456	6.44192	8.00248e-06	0.000313446	3.71614
tetur02g10830	CHCH	0.720338	12.7222	5.53359	4.47907e-05	0.000950627	1.97665
tetur03g07520	Protein-tyrosine phosphatase; receptor/non-receptor type	0.718301	9.59458	3.48988	0.00301371	0.0171271	-2.22984
tetur24g00870	Galactose oxidase/kelch; beta-propeller	0.714078	8.74607	7.07583	2.57114e-06	0.000151793	4.86291
tetur04g02990	Hypothetical protein	0.712509	11.7071	4.79277	0.000197327	0.00261056	0.483364
tetur36g01110	Glycine-rich secreted protein	0.711763	11.6031	6.02866	1.72797e-05	0.000519138	2.93838
tetur13g00420	beta-lactamase-like protein 2	0.710849	10.5561	9.23418	7.97897e-08	1.30893e-05	8.35301
tetur12g01980	patched sphingolipid transporter	0.710509	9.66124	5.68722	3.32135e-05	0.000777062	2.27847
tetur01g11220	amino acid transporter	0.709684	7.46604	4.44949	0.000400308	0.00413168	-0.22591
tetur33g00590	leucine-rich repeat-containing protein 58	0.707945	11.2412	3.60664	0.00235403	0.0144022	-1.98681
tetur08g07740	Transcription factor, MADS-box	0.706337	11.3597	7.07439	2.57763e-06	0.000151793	4.86037
tetur04g08320	NK2 homeobox 2	0.703736	10.1861	7.15635	2.23459e-06	0.000140991	5.00451
tetur18g00530	Hypothetical protein	0.702911	11.1112	3.93729	0.00117033	0.00878749	-1.29552
tetur12g01010	PREDICTED: similar to Y4C6B.2a	0.699148	8.90511	5.43951	5.38726e-05	0.00108088	1.7904
tetur05g00200	Hypothetical protein	0.697711	10.8474	4.91396	0.000154152	0.00220461	0.73151
tetur02g12650	MIF4G-like, type 3	0.697069	8.91887	4.15534	0.000739751	0.00642284	-0.839223
tetur10g05590	HNTX-XIV-3.2 precursor	0.69687	9.60524	7.84067	7.02204e-07	6.48445e-05	6.17147
tetur13g00650	Secreted peptide of unknown function	0.696294	9.63829	6.06398	1.61646e-05	0.000497571	3.00577
tetur12g00550	C-factor	0.695971	13.5984	5.35606	6.35179e-05	0.00121753	1.62431
tetur41g00580	calponin/transgelin	0.695593	13.3029	3.71373	0.00187677	0.0122978	-1.76325
tetur01g00940	Orphan secreted protein	0.695333	12.5277	3.8612	0.00137418	0.00991608	-1.4548
tetur29g00800	troponin C	0.694891	12.169	4.24096	0.000618272	0.0056547	-0.660331
tetur01g03490	endonuclease-chitinase multifunctional protein	0.69434	12.1054	2.8453	0.0116629	0.0457712	-3.54417
tetur06g03530	Calycin-like	0.692388	6.81902	3.85699	0.00138644	0.00998578	-1.4636
tetur32g01960	Carbonyl reductase [NADPH] 1	0.691226	9.59714	2.8552	0.0114261	0.0451149	-3.52452
tetur04g09567	G protein-coupled receptor, rhodopsin-like	0.690868	12.2443	6.51094	7.05312e-06	0.000283426	3.84373
tetur06g01550	cuticular protein analogous to peritrophins 1-A	0.689883	8.74307	3.58597	0.00245927	0.0148002	-2.02989
tetur07g00650	relish	0.689388	10.5843	5.53198	4.49316e-05	0.000952168	1.97348
tetur19g01150	TVP18/Calcium channel flower	0.688101	10.0904	6.66564	5.32693e-06	0.000235215	4.12731
tetur03g04010	paramyosin	0.685376	12.7717	4.24955	0.000607266	0.00557453	-0.642406
tetur01g13270	Small Secreted Protein; family A	0.682572	14.0124	3.10065	0.00684731	0.0311006	-3.03088
tetur38g91432	hypothetical protein	0.680168	9.44201	4.90069	0.000158365	0.00223959	0.704402
tetur418g00030	hypothetical protein	0.679745	7.744	7.26847	1.84068e-06	0.000121642	5.20019
tetur27g00220	Cytochrome P450 probable pseudogene	0.679577	10.8413	3.31987	0.00431653	0.0222301	-2.58182
tetur07g06220	Hypothetical protein	0.67936	9.29536	4.59171	0.00029822	0.00340293	0.0689675
tetur04g01230	hypothetical protein IscW_ISCW013795	0.679117	11.0686	3.31268	0.00438257	0.0224341	-2.59665
tetur10g05620	Prokineticin	0.678397	11.578	6.18939	1.27735e-05	0.000425093	3.24366
tetur11g05260	Nuclear hormone receptor; ligand-binding	0.678396	7.27096	7.03529	2.76025e-06	0.000158473	4.79127
tetur08g01540	Novel Cell surface protein	0.675539	9.85406	6.80553	4.14447e-06	0.000202064	4.38084
tetur28g01890	Hypothetical protein	0.674034	7.03225	4.25215	0.000603967	0.00556682	-0.63697
tetur17g01140	Band 7 protein	0.671418	11.827	6.11096	1.47962e-05	0.000466726	3.09514
tetur02g13060	PREDICTED: retinaldehyde binding protein 1-like	0.670577	10.4117	4.71521	0.000231293	0.00290292	0.323896
tetur12g04290	cytosolic malate dehydrogenase	0.670133	12.9921	4.58562	0.000301991	0.00341256	0.0563704
tetur02g10560	ortholog of Argonaute-1 (Drosophila melanogaster)	0.669971	12.1298	4.12407	0.000789928	0.00671222	-0.90461
tetur11g01070	Hypothetical protein	0.66977	9.0175	2.85113	0.0115227	0.0454007	-3.53259
tetur02g03260	GLIS family zinc finger 3	0.66886	11.0297	4.179	0.000703946	0.00622042	-0.789771
tetur06g01560	Vitellinogen, superhelical	0.668123	8.80221	6.54321	6.65011e-06	0.000273825	3.90317
tetur22g02200	Lipase/lipooxygenase; PLAT/LH2	0.667048	14.504	3.98236	0.00106426	0.00820345	-1.20117
tetur01g02230	Glutathione S-transferase; class delta	0.666845	12.3623	7.24616	1.91285e-06	0.000125815	5.16139
tetur04g00150	intradiol ring-cleavage dioxygenase	0.666059	10.6408	9.68596	4.13801e-08	7.90416e-06	9.00769
tetur05g09318	Secreted Protein; family A	0.665545	10.5092	4.72491	0.000226739	0.00286122	0.343854
tetur02g08770	RNA-dependent RNA polymerase, eukaryotic-type	0.665297	8.84854	3.60286	0.00237296	0.0144618	-1.9947
tetur04g08620	intradiol ring-cleavage dioxygenase	0.663967	12.8447	4.4339	0.000413485	0.00420849	-0.258317
tetur11g03510	Cell division/GTP binding protein	0.663076	11.181	4.22872	0.000634308	0.00573221	-0.685882
tetur01g12970	biphenyl hydrolase-like	0.662657	10.2524	5.00615	0.000127892	0.00194121	0.919353
tetur02g12070	transcription factor SOX-2	0.661055	9.81299	3.8626	0.00137012	0.00989892	-1.45187
tetur30g00770	Domain of unknown function DUF3421	0.660511	11.7008	5.76146	2.87767e-05	0.000722412	2.42324
tetur04g04290	Polycystin cation channel, PKD1/PKD2	0.660499	9.00419	4.44258	0.000406092	0.00416071	-0.240265
tetur11g00260	Kruppel - like zinc finger containing protein	0.660034	11.0987	6.46248	7.70649e-06	0.000304417	3.75422
tetur01g03800	Low-density lipoprotein (LDL) receptor class A, conserved site	0.65953	8.9911	6.20442	1.24198e-05	0.000419325	3.27203
tetur14g01740	Dynein light chain 1; cytoplasmic	0.659123	9.22851	4.53497	0.000335313	0.00363786	-0.0485112
tetur02g08580	phosphoenolpyruvate synthase	0.65842	10.2311	5.19991	8.66468e-05	0.00150274	1.31135
tetur01g12110	Curculin-like (mannose-binding) lectin	0.658363	6.51119	7.78045	7.75594e-07	6.6349e-05	6.07138
tetur20g01840	Hypothetical protein	0.658007	9.2965	3.06929	0.00731266	0.0325879	-3.09457
tetur37g00360	Haemolymph juvenile hormone binding	0.656974	12.2085	6.48648	7.37537e-06	0.000292998	3.79859
tetur02g07570	Lecithin:cholesterol/phospholipid:diacylglycerol acyltransferase	0.656938	7.29364	2.78981	0.0130806	0.049703	-3.65392
tetur09g00900	Hypothetical protein	0.656473	9.8196	5.6641	3.4736e-05	0.000796642	2.23323
tetur26g00340	Epa4p	0.655388	10.5684	5.47192	5.05468e-05	0.00103498	1.85468
tetur08g03910	Saccharopine dehydrogenase, NADP binding domain	0.654047	8.53361	3.25843	0.00491376	0.0243315	-2.7083
tetur21g02300	Fibronectin; type III	0.653952	7.09535	6.18449	1.2891e-05	0.000425954	3.2344
tetur15g02400	choline transporter-like protein 4	0.653571	7.76088	10.5824	1.19852e-08	2.83258e-06	10.2367
tetur30g01610	Phosphatidic acid phosphatase type 2/haloperoxidase	0.653512	12.0208	5.06951	0.000112547	0.00179972	1.04798
tetur13g00560	MOZART2 family	0.653495	8.61162	6.26522	1.10898e-05	0.000392479	3.38647
tetur39g00010	solute carrier family 1	0.651421	9.15943	4.67379	0.000251831	0.00304821	0.238524
tetur09g05470	musashi homolog 2	0.650787	7.80636	4.8503	0.000175466	0.00240344	0.601328
tetur01g00050	nanos homolog [Tetranychus urticae]	0.650314	10.2101	4.61138	0.000286359	0.00331369	0.109654
tetur26g02480	alcohol dehydrogenase class 3	0.650222	14.1982	4.6148	0.000284349	0.00329864	0.116718
tetur12g01560	Glycine-rich secreted protein	0.647269	15.4022	5.72166	3.10736e-05	0.000747052	2.34571
tetur18g03640	S-adenosyl-L-methionine-dependent methyltransferase	0.645252	8.53965	6.88848	3.57585e-06	0.000187379	4.52988
tetur15g00870	voltage-gated ion channel; putative	0.645149	9.71475	5.18894	8.85673e-05	0.00152467	1.28927
tetur02g13690	RNA-binding protein 1	0.64509	11.0155	7.65418	9.56788e-07	7.45889e-05	5.8599
tetur26g01860	CTF transcription factor/nuclear factor 1, N-terminal	0.644636	10.6893	3.645	0.00217052	0.0136087	-1.9068
tetur06g04700	PREDICTED: similar to ubiquitin specific peptidase 9; X-linked; isoform 2	0.644082	8.65217	5.26047	7.67888e-05	0.00138384	1.43305
tetur07g00880	solute carrier family 2	0.642776	8.41658	6.42296	8.28595e-06	0.000321367	3.68097
tetur03g03970	C2 calcium-dependent membrane targeting	0.641608	7.76005	5.14166	9.73598e-05	0.00162975	1.19393
tetur03g02500	synaptotagmin	0.64151	7.38706	5.7646	2.86029e-05	0.000721227	2.42936
tetur24g00900	Kelch-type beta propeller	0.639903	8.8297	7.00727	2.89941e-06	0.000163022	4.74161
tetur02g12840	Hypothetical protein	0.639647	10.6313	4.85911	0.000172344	0.00237702	0.619373
tetur16g02430	lost on transformation protein 1	0.639561	8.79939	4.36027	0.000481933	0.00471253	-0.411514
tetur10g03730	Tob1 homolog [Tetranychus urticae]	0.638555	11.9639	4.75215	0.000214427	0.00276849	0.399905
tetur03g04760	methionine-R-sulfoxide reductase B	0.637968	10.5551	6.53711	6.72442e-06	0.000275667	3.89195
tetur01g14800	hypothetical protein IscW_ISCW001304	0.636195	10.24	6.81599	4.06788e-06	0.000199727	4.39968
tetur11g03060	cytidine deaminase	0.63453	10.2042	4.58734	0.000300924	0.00341033	0.0599207
tetur36g00210	tRNA-specific adenosine deaminase 2	0.633724	10.8917	6.69187	5.08104e-06	0.000230033	4.17505
tetur03g08820	Small secreted protein; family B	0.632233	12.1864	3.86825	0.00135387	0.0098171	-1.44004
tetur07g05480	vitellogenin fused with superoxide dismutase	0.632078	9.84844	4.96125	0.000140052	0.00206001	0.827974
tetur25g01640	ABC-transporter; class A;	0.632047	9.62644	6.7176	4.85127e-06	0.00022179	4.22179
tetur02g09960	INneXin family member	0.63078	7.78826	6.97159	3.08732e-06	0.000168822	4.67821
tetur32g01330	ABC-transporter; class B	0.630744	13.1958	7.74185	8.26814e-07	6.77109e-05	6.00697
tetur35g01090	Sodium/calcium exchanger membrane region	0.629971	10.0373	7.12559	2.35737e-06	0.000146746	4.95053
tetur19g01840	Tetraspanin; large extracellular loop CD-63 antigen_like family	0.629824	14.4761	5.20416	8.59138e-05	0.00149374	1.31991
tetur01g07680	cad; Ortholog of Drosophila melanogaster caudal	0.628325	9.43668	8.25038	3.61478e-07	4.00036e-05	6.83933
tetur23g01140	unknown larval protein	0.628235	11.4392	6.1577	1.35537e-05	0.000442605	3.18376
tetur18g03610	Nucleotide-binding; alpha-beta plait	0.623984	8.49643	5.81258	2.60821e-05	0.000678524	2.52252
tetur02g07230	Glycoside hydrolase; subgroup; catalytic core	0.623642	9.81255	3.34935	0.00405609	0.0212651	-2.52099
tetur30g01820	Hypothetical protein	0.623611	10.8619	4.97972	0.000134912	0.00202064	0.865589
tetur02g03980	Hypothetical protein	0.623025	8.90118	5.38559	5.99161e-05	0.00117506	1.68317
tetur11g05470	Hypothetical protein	0.62192	7.23521	8.1414	4.30421e-07	4.51262e-05	6.66389
tetur05g03770	CRAL-TRIO lipid binding domain	0.620307	9.21622	3.90363	0.00125645	0.00925021	-1.36598
tetur11g01630	protein binding	0.620046	9.42153	5.76001	2.88571e-05	0.000722412	2.42043
tetur18g00470	Secreted protein with PMG repeats; maybe a pseudogene	0.619913	10.3156	9.57095	4.88052e-08	8.83818e-06	8.84334
tetur04g09492	Leucine-rich repeat domain, L domain-like	0.619865	8.9999	2.84407	0.0116924	0.045849	-3.5466
tetur02g06300	multiple coagulation factor deficiency 2	0.619361	10.7531	5.37574	6.10934e-05	0.00118802	1.66355
tetur29g01450	adenylate kinase 1	0.618854	10.4759	2.97248	0.0089532	0.0377855	-3.29008
tetur08g03450	CMP-sialic acid transporter	0.617407	10.6449	6.39363	8.74507e-06	0.000330809	3.62648
tetur06g00790	PREDICTED: filamin B; beta	0.616687	8.26643	4.04781	0.000927254	0.00741947	-1.06416
tetur19g03110	lethal	0.616417	8.6645	4.65807	0.000260106	0.0031079	0.20609
tetur13g92980	hypothetical protein	0.616376	8.66933	5.25155	7.81641e-05	0.00139554	1.41516
tetur16g01550	lariat debranching enzyme	0.614938	7.09316	4.58748	0.000300833	0.00341033	0.0602228
tetur24g01600	40S ribosomal protein S4	0.614696	15.9075	6.09228	1.53254e-05	0.000479143	3.05963
tetur08g01880	Tyrosine-protein kinase, active site	0.614334	9.06948	5.07031	0.000112368	0.00179891	1.04959
tetur02g06410	cytochrome c oxidase subunit III	0.614257	8.76564	5.01435	0.000125789	0.00192948	0.936029
tetur24g01310	Carboxyl/cholinesterase	0.612501	10.6032	3.13088	0.00642645	0.0296527	-2.96936
tetur16g02420	Carboxyl/cholinesterase	0.611613	11.6912	3.64698	0.00216142	0.0135707	-1.90265
tetur38g00280	Oxysterol-binding protein	0.611533	8.662	5.87979	2.29316e-05	0.000618487	2.65254
tetur33g01080	Hypothetical protein	0.611472	8.95968	5.44827	5.29519e-05	0.001067	1.80779
tetur12g03980	nonmuscle myosin heavy chain	0.610545	10.4238	6.20873	1.23203e-05	0.000417462	3.28016
tetur01g11990	DNA-binding SAP	0.610499	11.5158	4.42623	0.000420128	0.00426365	-0.274263
tetur01g15950	Acyl transferase/acyl hydrolase/lysophospholipase	0.610217	11.6289	3.06452	0.00738604	0.0328101	-3.10423
tetur21g00410	sodium-dependent glucose transporter 1	0.60943	8.77574	4.3373	0.000505577	0.00486862	-0.459384
tetur32g02010	40S ribosomal protein SA	0.609197	15.3875	7.36673	1.55517e-06	0.000106824	5.37022
tetur07g07390	Hypothetical protein	0.608568	10.2514	4.62427	0.00027885	0.00325108	0.136298
tetur08g05760	PREDICTED: similar to CG33978 CG33978-PA	0.606012	8.30345	5.08824	0.000108385	0.0017594	1.08591
tetur03g06040	putative glycosylhydrolase	0.605958	9.2436	3.1578	0.006073	0.0285509	-2.91444
tetur33g01320	ester hydrolase C11orf54 homolog	0.605954	12.2409	5.30974	6.96255e-05	0.00129794	1.53175
tetur04g00840	Calcium/calmodulin-dependent/calcium-dependent protein kinase	0.605376	11.8523	3.77065	0.00166394	0.0113346	-1.64426
tetur05g02820	Hypothetical protein	0.604224	8.34187	3.26902	0.00480531	0.0239818	-2.68654
tetur21g02960	Hypothetical protein	0.604047	8.56215	2.9688	0.00902209	0.0379958	-3.29747
tetur18g01480	ATPase; P-type; K/Mg/Cd/Cu/Zn/Na/Ca/Na/H-transporter	0.602603	8.56005	5.15511	9.47711e-05	0.001596	1.22107
tetur15g01870	Hypothetical protein	0.601192	8.70135	5.0707	0.000112279	0.00179891	1.05038
tetur38g00660	PREDICTED: titin	0.600987	11.7835	4.38532	0.000457437	0.00450872	-0.359362
tetur10g04430	Serine protease	0.600611	11.6283	4.51415	0.000350079	0.00375067	-0.0916776
tetur09g01550	superoxide dismutase	0.599878	9.64863	6.52695	6.85006e-06	0.00027929	3.87324
tetur08g01530	Novel large secreted protein	0.598816	7.47674	5.265	7.60988e-05	0.00138167	1.44215
tetur01g07820	HR96-like nuclear receptor d	0.598111	10.3832	5.99261	1.85004e-05	0.000540648	2.86943
tetur01g01000	Orphan secreted protein	0.597363	14.4487	3.13796	0.00633161	0.0293119	-2.95493
tetur04g07700	PREDICTED: similar to DNA topoisomerase type I	0.597238	9.29972	5.85391	2.40952e-05	0.000642415	2.60255
tetur01g04720	3'5'-cyclic nucleotide phosphodiesterase	0.596154	7.81449	4.22942	0.000633387	0.00573131	-0.684432
tetur08g07230	troponin i	0.595766	12.271	2.99636	0.00851782	0.036411	-3.24201
tetur19g02360	Neuropeptide precursor.	0.59572	8.18409	5.7485	2.95048e-05	0.000727579	2.39802
tetur04g08690	Hypothetical protein	0.595358	10.1929	3.08912	0.00701493	0.0316455	-3.05432
tetur11g05560	Hypothetical protein	0.59371	7.48005	4.20531	0.000666177	0.0059699	-0.734782
tetur23g00910	Carboxyl/cholinesterase	0.59266	8.14714	9.85066	3.27512e-08	6.52403e-06	9.24032
tetur06g04840	Hypothetical protein	0.592136	6.97916	6.8212	4.03023e-06	0.000199727	4.40907
tetur06g04550	Hypothetical protein	0.591978	12.1888	4.50249	0.000358641	0.00382039	-0.115876
tetur02g05250	Small secreted protein; Family G	0.591777	8.08723	2.88971	0.0106365	0.0427916	-3.45583
tetur02g05980	FERM/acyl-CoA-binding protein; 3-helical bundle	0.591347	12.3075	6.06074	1.62637e-05	0.000499518	2.9996
tetur04g07350	PapD-like	0.591214	7.85148	4.15618	0.000738445	0.00641944	-0.837462
tetur02g08140	spectrin realated protein 1	0.590293	9.31572	5.3462	6.47702e-05	0.00123046	1.60462
tetur17g01550	protein lin-7 homolog B	0.588825	11.0585	6.47981	7.4658e-06	0.000295748	3.78628
tetur92g00010	Fibroin (new)	0.588128	9.75628	3.25267	0.00497382	0.0245331	-2.72015
tetur31g00050	PREDICTED: similar to Activating signal cointegrator 1 complex subunit 3	0.586102	8.25562	3.51096	0.00288225	0.0165938	-2.18602
tetur02g04260	S-adenosyl-L-methionine-dependent methyltransferase	0.585255	9.72155	5.88365	2.2763e-05	0.00061513	2.65999
tetur08g04930	eukaryotic translation initiation factor 4E nuclear import factor 1	-0.586926	14.2742	-4.65852	0.000259865	0.00310768	0.207021
tetur04g02100	basigin	-0.586951	12.2425	-6.66025	5.379e-06	0.000235864	4.11748
tetur30g02350	beta-glucuronidase	-0.587626	11.6818	-3.11634	0.00662562	0.0303707	-2.99897
tetur26g02400	calponin-1	-0.588334	12.6469	-4.5177	0.000347516	0.00373301	-0.0843179
tetur07g02980	PRKCA-binding protein	-0.588785	12.7423	-7.02745	2.79848e-06	0.000158626	4.77738
tetur15g02130	AP-3 complex subunit delta-1	-0.588908	12.7213	-5.67313	3.41326e-05	0.000786685	2.25092
tetur09g01370	Zinc finger, C2H2-like	-0.5898	11.3194	-4.99051	0.000132	0.00199199	0.887544
tetur02g09330	Forkhead-associated (FHA) domain	-0.589953	11.0087	-6.17482	1.31263e-05	0.000431681	3.21613
tetur39g00280	Membrane-bound beta-1;4-galactosyltransferase precursor	-0.593722	11.2202	-3.73662	0.0017881	0.0119241	-1.71543
tetur08g00460	adenylate cyclase	-0.594755	8.14261	-3.58948	0.00244107	0.0147352	-2.02257
tetur12g01280	Hypothetical protein	-0.59482	8.79633	-5.32218	6.79278e-05	0.00127259	1.55664
tetur37g00600	SCY1-like 2	-0.595571	10.9293	-4.40594	0.000438226	0.00438981	-0.316453
tetur01g01990	Hypothetical protein	-0.596088	9.61065	-3.96831	0.00109623	0.00836659	-1.23056
tetur01g12780	nanos homolog [Tetranychus urticae]	-0.596399	11.6081	-7.13596	2.3152e-06	0.000144767	4.96875
tetur17g03320	Sterile alpha motif homology	-0.597094	14.1445	-4.15613	0.00073852	0.00641944	-0.837563
tetur20g00530	Phosphatidic acid phosphatase type 2/haloperoxidase	-0.598121	12.7172	-2.80356	0.0127144	0.0487314	-3.62679
tetur07g07380	beta-galactosidase	-0.598284	14.6228	-4.82559	0.000184536	0.00249097	0.550689
tetur05g09280	Zinc finger, DksA/TraR C4-type conserved site	-0.598372	11.5326	-4.23494	0.000626113	0.00568763	-0.672906
tetur17g00790	Glycoside hydrolase; subgroup; catalytic core	-0.600754	10.5674	-3.19266	0.00564376	0.0270126	-2.84319
tetur04g00690	Hypothetical protein	-0.601015	13.1544	-5.88777	2.25847e-05	0.000611674	2.66793
tetur21g03420	Cutoff-like protein	-0.601184	7.26005	-4.09084	0.000847033	0.0070012	-0.974114
tetur04g07190	tiptop	-0.601826	8.92691	-5.3338	6.63802e-05	0.00124913	1.57987
tetur08g03610	poly	-0.602106	11.7962	-4.97346	0.000136631	0.00203764	0.852849
tetur30g01010	Protein of unknown function DUF4588	-0.602799	10.9517	-8.06905	4.83702e-07	4.81767e-05	6.54654
tetur09g04820	low density lipoprotein receptor adapter protein 1	-0.604961	13.598	-6.61854	5.80014e-06	0.000248853	4.04133
tetur02g08260	high mobility group protein B2	-0.606284	14.9348	-7.87771	6.60714e-07	6.19542e-05	6.23277
tetur36g01180	COP9 signalosome complex subunit 6	-0.609231	10.4962	-9.96788	2.77772e-08	5.78098e-06	9.404
tetur02g14440	Hypothetical protein	-0.611046	7.23256	-5.4986	4.79678e-05	0.000998303	1.90751
tetur15g00790	collagen alpha-1	-0.613211	8.7749	-4.90083	0.000158319	0.00223959	0.704694
tetur32g02327	Short-chain dehydrogenase/reductase, conserved site	-0.613644	12.4143	-8.99857	1.13395e-07	1.63694e-05	8.00171
tetur05g03200	elongation of very long chain fatty acids protein 1	-0.614057	10.5765	-4.34231	0.000500315	0.00483464	-0.448928
tetur17g02620	Hypothetical protein	-0.614746	7.77699	-6.84585	3.85718e-06	0.00019558	4.4534
tetur04g04380	C5HC2 zinc finger	-0.616236	12.6858	-5.78142	2.7692e-05	0.000707211	2.46204
tetur05g07070	lipoprotein Blc	-0.616809	14.3973	-3.95733	0.00112189	0.00850095	-1.25355
tetur10g01980	vasa	-0.617128	11.2889	-4.01142	0.00100106	0.00785528	-1.14033
tetur03g00220	Hypothetical protein	-0.619393	11.7788	-4.5495	0.00032539	0.00358228	-0.0184161
tetur02g15193	Amino acid transporter, transmembrane domain	-0.620365	10.2434	-6.54445	6.63512e-06	0.000273825	3.90545
tetur28g00980	Hypothetical protein	-0.621311	10.923	-3.76061	0.00169963	0.0115159	-1.66525
tetur03g02080	DEAD	-0.621608	10.4163	-9.18118	8.63076e-08	1.39184e-05	8.27458
tetur03g04410	adenylate cyclase	-0.621957	9.83011	-7.33832	1.6326e-06	0.000111469	5.32121
tetur07g07200	sialin	-0.622028	11.646	-6.96449	3.12617e-06	0.000169616	4.66559
tetur18g02090	poly	-0.622786	11.8124	-5.75412	2.91866e-05	0.000725451	2.40897
tetur08g06290	punt	-0.623799	11.4534	-4.56183	0.000317203	0.00352854	0.00711738
tetur02g02160	myelin gene regulatory factor	-0.624194	8.01135	-4.56658	0.000314104	0.00349829	0.0169579
tetur04g92253	hypothetical protein	-0.624255	9.7606	-5.02702	0.000122613	0.00189758	0.961763
tetur07g06020	Zinc finger; RING-type	-0.626001	11.3097	-4.91928	0.000152497	0.00218317	0.742367
tetur20g02430	Homeobox protein, antennapedia type	-0.626658	9.0556	-5.26175	7.65928e-05	0.00138343	1.43563
tetur29g01670	isoamyl acetate-hydrolyzing esterase 1 homolog	-0.626982	11.3035	-4.14074	0.000762755	0.00655321	-0.869738
tetur18g02190	18w	-0.627542	9.16455	-4.13173	0.000777328	0.00664565	-0.888593
tetur14g01830	G-protein coupled neuropeptide receptor	-0.627558	11.5416	-6.17559	1.31074e-05	0.000431681	3.21758
tetur452g00010	Legumain	-0.62889	9.5062	-3.37071	0.00387713	0.020611	-2.47684
tetur02g07390	Zinc finger, CCCH-type	-0.628992	10.2038	-4.35361	0.00048867	0.00475507	-0.425391
tetur02g06220	HSPB1-associated protein 1	-0.629583	9.80505	-7.27143	1.83133e-06	0.000121642	5.20533
tetur04g03130	PREDICTED: rCG19957-like	-0.630017	9.05183	-3.33467	0.00418374	0.0217193	-2.55129
tetur17g03970	P-loop containing nucleoside triphosphate hydrolase	-0.630041	9.67723	-5.04925	0.000117238	0.00183993	1.00688
tetur09g00400	Cysteine dioxygenase type I	-0.630453	12.9511	-3.51903	0.00283349	0.0163536	-2.16926
tetur17g02260	SEA domain	-0.631523	7.46182	-5.37039	6.17432e-05	0.0011908	1.65288
tetur08g03280	PREDICTED: similar to n-acetylgalactosaminyltransferase	-0.632179	10.2821	-8.17921	4.0506e-07	4.31157e-05	6.72493
tetur35g00640	A kinase	-0.634198	9.83676	-5.53421	4.47365e-05	0.000950627	1.97788
tetur16g01560	Hypothetical protein	-0.635033	8.30646	-5.28727	7.28018e-05	0.00133748	1.48679
tetur12g04390	no-mechanoreceptor potential A; putative	-0.636049	8.21121	-4.09433	0.000840852	0.0069712	-0.966822
tetur01g01180	Low density lipoprotein-receptor; class A (cysteine-rich) repeat	-0.636197	10.8456	-4.68216	0.000247537	0.00301454	0.255781
tetur02g00160	histone-binding protein N1/N2; nuclear autoantigenic sperm protein	-0.636766	13.2018	-6.11421	1.47061e-05	0.000464991	3.10131
tetur28g02010	pinin	-0.637623	11.7158	-9.32864	6.94256e-08	1.16635e-05	8.49192
tetur02g01140	histone acetyltransferase type B catalytic subunit	-0.637948	12.1583	-7.18282	2.13426e-06	0.000136514	5.05087
tetur09g05250	Hypothetical protein	-0.638091	13.5359	-5.83217	2.512e-05	0.000659728	2.56048
tetur01g16520	Secreted low complexity protein; putative	-0.638492	7.41695	-4.24713	0.000610338	0.00559537	-0.647442
tetur07g00520	RILP-like protein 1	-0.639589	11.4689	-5.5898	4.01343e-05	0.000888307	2.08742
tetur07g06130	SANT/Myb domain	-0.640773	11.1395	-5.94251	2.03471e-05	0.000573936	2.77332
tetur13g03700	Carboxyl/cholinesterase	-0.640899	10.1985	-3.09697	0.00690044	0.0312503	-3.03837
tetur02g14220	PREDICTED: similar to enhancer of yellow 2 homolog	-0.64167	10.3736	-6.03051	1.72193e-05	0.000519138	2.94192
tetur10g01270	Insulin-like	-0.642141	12.8762	-5.68011	3.36743e-05	0.000781288	2.26457
tetur01g04440	Cytochrome P450 - CYP406A1	-0.643623	8.66235	-3.90297	0.00125819	0.00925648	-1.36736
tetur07g00740	MAM	-0.645099	10.817	-3.18346	0.00575406	0.0273932	-2.86201
tetur07g06290	USP19 protein	-0.646941	11.9249	-5.19127	8.8155e-05	0.00151945	1.29397
tetur14g01530	PREDICTED: similar to limkain b1	-0.647459	14.3589	-3.83089	0.00146503	0.0103855	-1.51823
tetur25g00240	Adhesion molecule CD36	-0.64759	13.9281	-6.69738	5.03086e-06	0.000229249	4.18508
tetur13g03450	GM21310	-0.650256	13.0763	-3.0833	0.00710103	0.0318997	-3.06613
tetur18g01690	angiopoietin-4 precursor	-0.650289	9.7372	-4.62645	0.000277601	0.00323922	0.1408
tetur05g00330	alkaline phosphatase	-0.65044	13.9011	-4.53704	0.000333882	0.00363494	-0.0442281
tetur20g02940	Hypothetical protein	-0.651027	12.7445	-3.72908	0.00181681	0.0120381	-1.73117
tetur06g04920	3-oxoacyl-acyl-carrier-protein reductase	-0.651336	8.32649	-3.26319	0.00486468	0.0241915	-2.69851
tetur20g00290	Cytochrome P450 - CYP392B3	-0.651777	11.8023	-5.55491	4.29617e-05	0.000925542	2.01872
tetur15g01970	conserved secreted protein 1	-0.651959	15.8761	-3.1434	0.00625963	0.0290948	-2.94384
tetur26g00220	Nose resistant-to-fluoxetine protein; N-terminal	-0.652832	11.0521	-5.75568	2.90992e-05	0.000725451	2.41199
tetur14g02870	elongation of very long chain fatty acids protein 6	-0.652978	13.763	-3.6988	0.00193701	0.012579	-1.79446
tetur36g01200	Notch	-0.653119	10.1601	-5.15946	9.39484e-05	0.00158406	1.22985
tetur06g05540	Hypothetical protein	-0.653906	7.77095	-7.72837	8.45533e-07	6.85472e-05	5.98442
tetur33g01130	conserved hypothetical protein	-0.654596	8.96538	-7.65169	9.60769e-07	7.45889e-05	5.85571
tetur04g08550	Insulin-like	-0.654974	7.61897	-3.66217	0.00209306	0.0133085	-1.87095
tetur25g00620	PREDICTED: similar to AGAP003892-PA	-0.655097	12.0784	-6.15167	1.37079e-05	0.000445188	3.17233
tetur21g02180	protein LSM14 homolog A	-0.655184	15.1537	-6.44265	7.99175e-06	0.000313446	3.7175
tetur03g09190	elongase; putative	-0.656095	12.7761	-4.35968	0.000482529	0.00471269	-0.41275
tetur08g04200	EAR	-0.657209	13.1167	-5.02308	0.000123593	0.00190639	0.953756
tetur28g00870	ABC-transporter; class H	-0.660238	12.8377	-5.50921	4.69807e-05	0.000986594	1.92849
tetur02g13030	Apple-like	-0.660294	10.2334	-5.01384	0.00012592	0.00192948	0.934989
tetur08g07510	innexin; putative	-0.660516	10.8096	-5.24521	7.91587e-05	0.00140789	1.40242
tetur43g00210	licorne; MAP kinase activity	-0.660737	9.45987	-4.92683	0.000150176	0.00216104	0.757788
tetur24g02350	S-methyl-5'-thioadenosine phosphorylase	-0.661351	6.59801	-4.59731	0.000294796	0.00338066	0.0805442
tetur02g07000	cuticle (secreted) protein; putative	-0.663312	6.88356	-5.76059	2.88247e-05	0.000722412	2.42156
tetur11g00150	Hypothetical protein	-0.663677	7.7583	-8.20559	3.88293e-07	4.16489e-05	6.76742
tetur08g05390	UDP-glycosyltransferase; teturUGT43	-0.665316	12.1179	-6.99348	2.9706e-06	0.000165688	4.71712
tetur11g01040	Hypothetical protein	-0.665385	8.66471	-3.815	0.00151506	0.0106375	-1.55149
tetur03g07010	Pollen allergen/expansin; C-terminal	-0.668423	10.8798	-5.84941	2.43035e-05	0.000646734	2.59385
tetur25g01630	non-ribosomal peptide synthetase	-0.668962	10.7241	-3.20561	0.00549201	0.026471	-2.81667
tetur01g08550	Hypothetical protein	-0.669382	8.83717	-3.78065	0.00162915	0.0111686	-1.62336
tetur24g00480	WD40 repeat, conserved site	-0.670033	9.58598	-6.51163	7.04417e-06	0.000283426	3.84501
tetur14g01580	PREDICTED: similar to Nucleobindin 2 precursor	-0.672113	10.548	-6.79053	4.25697e-06	0.000205395	4.35379
tetur11g01020	Hypothetical protein	-0.672675	10.7273	-5.3108	6.94792e-05	0.00129694	1.53387
tetur28g00390	NOP14 nucleolar protein homolog	-0.674506	11.7614	-8.171	4.10425e-07	4.33558e-05	6.71171
tetur32g00060	PREDICTED: similar to Glucosylceramidase precursor	-0.675473	10.2372	-3.4695	0.00314647	0.0176415	-2.27217
tetur08g05000	MAM	-0.676245	10.8009	-5.0006	0.000129333	0.00196024	0.908077
tetur09g06340	Nose resistant-to-fluoxetine protein; N-terminal	-0.67642	12.0438	-4.83133	0.000182386	0.00247152	0.562461
tetur35g00370	G-protein coupled neuropeptide receptor.	-0.677334	10.0831	-7.09142	2.50209e-06	0.000151793	4.89039
tetur02g01270	short-chain dehydrogenase/reductase SDR	-0.677363	11.267	-2.98859	0.00865715	0.0368371	-3.25766
tetur02g15155	Conserved two-pass membrane protein	-0.678231	9.14306	-3.93212	0.00118315	0.00885074	-1.30633
tetur03g07890	Insulin-like growth factor binding protein, N-terminal	-0.679193	10.4277	-5.68114	3.36075e-05	0.000781037	2.26657
tetur30g01870	Hypothetical protein	-0.680053	9.38319	-3.10991	0.00671556	0.0306685	-3.01205
tetur13g01810	serine/threonine-protein kinase 3	-0.680866	10.7253	-6.01963	1.75774e-05	0.000524838	2.92113
tetur16g02120	neutral ceramidase	-0.682636	12.6297	-5.48128	4.96259e-05	0.00101942	1.87323
tetur09g03940	viral A-type inclusion protein	-0.683169	11.9433	-3.95595	0.00112517	0.00850794	-1.25645
tetur18g02080	Hypothetical protein	-0.6833	8.92824	-3.25012	0.00500059	0.0246564	-2.72538
tetur22g01100	nucleoprotein	-0.684557	11.4752	-3.79404	0.00158367	0.01097	-1.59534
tetur02g07250	PREDICTED: similar to Glucosylceramidase precursor	-0.68632	10.949	-3.08656	0.00705267	0.0317849	-3.05951
tetur12g03000	Carboxylesterase type B, conserved site	-0.688325	8.54947	-4.05552	0.000912327	0.00734497	-1.04802
tetur19g01230	Hypothetical protein	-0.688443	13.6566	-4.59393	0.000296856	0.00339216	0.0735634
tetur04g09180	Kinetochore protein Nuf2	-0.690173	10.3	-5.69718	3.25797e-05	0.000768682	2.29793
tetur01g13750	PREDICTED: similar to dimethylaniline monooxygenase	-0.6912	11.1337	-2.80493	0.0126787	0.0486626	-3.6241
tetur02g09870	Carboxyl/cholinesterase	-0.691397	8.31671	-6.35943	9.31425e-06	0.000346341	3.56277
tetur37g00510	cyclin-L1	-0.692762	13.7548	-7.63785	9.83271e-07	7.45889e-05	5.83239
tetur04g04920	Schwannomin interacting protein 1	-0.696271	12.664	-7.07575	2.57151e-06	0.000151793	4.86277
tetur29g01700	isoamyl acetate-hydrolyzing esterase 1 homolog	-0.696678	11.0979	-3.98685	0.00105423	0.00814935	-1.19176
tetur02g10770	AGAP002847-PA	-0.698315	15.2639	-3.18271	0.0057632	0.0274086	-2.86356
tetur03g03150	twist; helix-loop-helix transcription factor	-0.69857	7.96802	-8.69537	1.79939e-07	2.30267e-05	7.53937
tetur36g00920	Cytochrome P450 - CYP391A1	-0.699468	11.3163	-5.26988	7.53644e-05	0.00137409	1.45192
tetur16g00520	Hypothetical protein	-0.702514	12.9846	-4.79636	0.000195884	0.0025964	0.490736
tetur10g01500	Hypothetical protein	-0.704199	8.55854	-7.71448	8.65287e-07	6.86943e-05	5.96116
tetur25g01540	PREDICTED: solute carrier family 12	-0.706545	11.7315	-4.80158	0.000193806	0.00257865	0.501451
tetur05g05000	ABC-transporter; class H	-0.707486	7.91876	-4.30862	0.000536746	0.00509142	-0.519154
tetur27g02588	Insulin-like growth factor binding protein, N-terminal	-0.707611	12.3563	-4.69361	0.000241782	0.0029704	0.279384
tetur20g02060	Peptidase S8, subtilisin, Asp-active site	-0.708941	10.4458	-5.61601	3.81375e-05	0.00085911	2.13893
tetur19g00440	UDP-glycosyltransferase; teturUGT57	-0.709417	8.12367	-5.87553	2.3119e-05	0.000622338	2.64432
tetur08g05110	Hypothetical protein	-0.709547	8.13045	-3.50656	0.00290926	0.0167079	-2.19519
tetur03g02700	Carboxyl/cholinesterase	-0.713126	9.21399	-5.46361	5.13781e-05	0.0010468	1.83822
tetur30g01660	Hypothetical protein	-0.714134	7.86182	-4.01696	0.000989456	0.0077905	-1.12873
tetur22g02590	PREDICTED: rCG19957-like	-0.720893	8.57642	-4.33575	0.000507211	0.00487762	-0.462608
tetur04g02670	paired box pox neuro protein	-0.724769	9.51739	-8.08776	4.6929e-07	4.74187e-05	6.57696
tetur09g01670	3-hydroxyisobutyrate dehydrogenase	-0.724911	11.6631	-4.89753	0.000159383	0.00224944	0.697957
tetur06g00410	Hypothetical protein	-0.725582	7.47084	-2.85678	0.0113887	0.0450271	-3.52138
tetur28g02510	Aldehyde dehydrogenase; N-terminal	-0.725806	8.89991	-7.03316	2.77061e-06	0.000158473	4.78749
tetur21g02460	Glycoside hydrolase; family 22	-0.726264	9.50818	-3.80047	0.0015623	0.0108815	-1.58189
tetur21g03340	Calycin-like	-0.727942	7.19482	-4.25219	0.000603917	0.00556682	-0.636888
tetur24g01990	Hypothetical protein	-0.730417	7.3993	-5.46779	5.09582e-05	0.00104188	1.8465
tetur11g03760	Carboxyl/cholinesterase	-0.731826	8.7422	-4.10333	0.000825097	0.00691416	-0.947991
tetur03g00300	Short-chain dehydrogenase/reductase SDR	-0.734509	8.94753	-5.37281	6.14477e-05	0.00118839	1.65772
tetur04g03970	YY1-associated factor 2	-0.735872	11.2916	-9.24005	7.91011e-08	1.30893e-05	8.36167
tetur01g03610	Hypothetical protein	-0.73814	8.91937	-5.09741	0.000106406	0.00173535	1.10447
tetur15g02520	Hypothetical protein	-0.738579	7.67455	-8.23139	3.72601e-07	4.05903e-05	6.80888
tetur06g01620	PREDICTED: similar to acid alpha glucosidase	-0.739392	15.4302	-4.9646	0.000139106	0.00205912	0.834794
tetur13g01660	Hypothetical protein	-0.740042	13.2894	-3.93587	0.00117384	0.00879733	-1.29849
tetur04g00110	RPGR	-0.742896	9.06796	-3.6038	0.00236821	0.0144455	-1.99272
tetur01g11060	Skb1 methyltransferase	-0.74314	12.0934	-3.47244	0.00312695	0.0175532	-2.26606
tetur03g07220	Apple-like	-0.748984	8.35805	-4.71812	0.000229916	0.0028951	0.32989
tetur08g02870	2-ketogluconate reductase	-0.751673	7.76569	-4.92403	0.000151031	0.00216887	0.752077
tetur21g00360	Myc-type, basic helix-loop-helix (bHLH) domain	-0.753195	9.65343	-5.45779	5.19693e-05	0.00105599	1.82668
tetur17g03420	Domain of unknown function DUF3421	-0.753511	7.60955	-5.28107	7.37048e-05	0.00134874	1.47436
tetur37g00870	Cbl	-0.756995	9.86045	-5.63263	3.6924e-05	0.000837185	2.17157
tetur05g00160	hypothetical protein GrBNV_gp28	-0.758675	9.38631	-7.53118	1.17626e-06	8.54262e-05	5.65177
tetur14g01410	Winged helix-turn-helix DNA-binding domain	-0.758753	8.6132	-5.83211	2.5123e-05	0.000659728	2.56036
tetur17g00940	cullin (aka lin19-like): similar to SCF complex protein cul-1	-0.759678	13.8893	-5.3351	6.62104e-05	0.00124762	1.58245
tetur07g00630	putative BigA-like protein	-0.761069	12.1687	-4.7284	0.000225122	0.00285835	0.351042
tetur01g01500	Apolipoprotein D precursor; putative	-0.761676	9.34004	-4.46668	0.000386276	0.00402497	-0.190195
tetur24g00320	Hypothetical protein	-0.761884	12.417	-5.49983	4.78522e-05	0.000997387	1.90994
tetur30g00290	PREDICTED: lysophospholipase 3	-0.765285	12.6531	-4.59364	0.000297033	0.00339216	0.0729669
tetur01g10620	Toll-like receptor; leucine rich repeat-containing	-0.770048	10.1918	-4.54892	0.000325777	0.00358228	-0.0196058
tetur02g00220	GM2 activator protein	-0.771385	11.5074	-4.15274	0.0007438	0.00644596	-0.844663
tetur03g08640	PREDICTED: similar to forked CG5424-PB	-0.773257	9.20937	-4.15227	0.000744523	0.00644822	-0.845631
tetur05g08460	far upstream	-0.776205	11.352	-6.67875	5.20249e-06	0.000233259	4.15119
tetur02g14100	Hypothetical protein	-0.776308	9.05662	-6.82152	4.02794e-06	0.000199727	4.40965
tetur16g03690	PAN/Apple domain	-0.776521	6.94634	-4.96327	0.000139481	0.00205973	0.832086
tetur04g06440	Hypothetical protein	-0.779371	8.30014	-3.83065	0.00146577	0.0103855	-1.51873
tetur27g01470	FAM195	-0.780239	12.3415	-5.97405	1.91633e-05	0.000549822	2.83386
tetur02g09080	sialin; putative	-0.78073	9.52766	-4.74256	0.000218678	0.00280554	0.380193
tetur05g05290	Glutathione S-transferase; class mu	-0.781104	9.36658	-4.08172	0.000863425	0.00708394	-0.993194
tetur01g11320	Polynucleotidyl transferase; ribonuclease H fold	-0.784543	13.4778	-7.22987	1.96739e-06	0.000128427	5.13302
tetur07g01710	Two pore domain potassium channel	-0.785711	10.4031	-6.00598	1.80373e-05	0.00053174	2.89503
tetur16g03570	antigen B membrane protein	-0.791676	6.92897	-6.30086	1.03801e-05	0.000374005	3.4533
tetur01g16270	Hypothetical protein	-0.792102	9.32216	-5.80846	2.62894e-05	0.00068011	2.51453
tetur01g06570	sodium-dependent glucose transporter 1	-0.794458	9.32624	-3.36022	0.00396405	0.0209387	-2.49854
tetur09g00460	Na+ channel/degenerin (ENaC/DEG) family protein	-0.799766	6.88941	-5.13575	9.85204e-05	0.00164326	1.182
tetur26g02150	sphingomyelin phosphodiesterase	-0.800018	13.4947	-7.75158	8.13575e-07	6.77109e-05	6.02323
tetur06g05630	Hypothetical protein	-0.801062	12.9115	-2.84321	0.0117133	0.0459163	-3.54831
tetur09g00220	UDP-glucuronosyl/UDP-glucosyltransferase	-0.803626	11.9753	-5.89505	2.22729e-05	0.000607774	2.68197
tetur14g03290	zinc finger protein 287	-0.81206	7.85711	-5.06583	0.000113385	0.00180703	1.04051
tetur02g12370	BTB/Kelch-associated	-0.813549	7.63433	-4.03825	0.000946097	0.0075342	-1.08417
tetur11g04920	Glycoside hydrolase; subgroup; catalytic core	-0.81875	15.1128	-4.06164	0.000900663	0.00728049	-1.03521
tetur11g00940	Limkain-b1;	-0.821068	8.95588	-4.48818	0.000369431	0.00390503	-0.145559
tetur14g02050	Immunoglobulin E-set	-0.821328	12.1679	-3.23925	0.0051165	0.0251478	-2.74771
tetur11g00710	Hypothetical protein	-0.821439	11.1756	-5.3217	6.79918e-05	0.00127259	1.55569
tetur02g11420	Cathepsin B	-0.824476	13.7968	-2.83317	0.0119595	0.0465961	-3.56823
tetur09g03550	Hypothetical Cell Surface Protein	-0.825453	6.34295	-5.50152	4.76944e-05	0.000995586	1.91328
tetur649g00010	Hypothetical protein	-0.840675	13.8293	-4.46196	0.000390083	0.00405013	-0.200013
tetur33g00950	Hypothetical protein	-0.844239	7.21879	-10.9614	7.26829e-09	1.83814e-06	10.73
tetur03g03900	ZnF_C2H2 domain-containing protein	-0.844491	12.999	-5.25309	7.79258e-05	0.00139307	1.41824
tetur29g00680	Winged helix-turn-helix DNA-binding domain	-0.845965	8.03795	-6.50186	7.17091e-06	0.000287331	3.827
tetur13g01870	Hypothetical protein	-0.846259	13.2608	-4.16979	0.000717672	0.00629986	-0.809022
tetur26g02380	PREDICTED: iron/zinc purple acid phosphatase-like protein-like	-0.848388	13.6268	-4.33093	0.000512337	0.00491336	-0.472656
tetur23g00740	UDP-glucuronosyl/UDP-glucosyltransferase	-0.850339	13.3754	-3.69728	0.00194323	0.0125971	-1.79763
tetur09g06725	n/a	-0.863043	7.57461	-11.5607	3.38591e-09	1.02637e-06	11.48
tetur36g01130	Leucine-rich repeat domain, L domain-like	-0.865987	10.7051	-6.85843	3.77182e-06	0.000192653	4.476
tetur02g13360	Alpha/Beta hydrolase fold	-0.870404	10.5617	-2.9634	0.00912419	0.0382985	-3.30831
tetur04g01370	zinc/iron transporter; putative	-0.878453	7.17955	-5.73142	3.04934e-05	0.000740766	2.36474
tetur10g05260	hypothetical protein RHECIAT_CH0002438	-0.888637	15.0099	-3.83864	0.00144124	0.0103112	-1.50201
tetur12g04671	Intradiol ring-cleavage dioxygenase, C-terminal	-0.888997	8.964	-2.85311	0.0114755	0.045253	-3.52866
tetur26g01490	Glutathione S-transferase; class delta	-0.889635	11.7481	-7.61634	1.01933e-06	7.64172e-05	5.79609
tetur10g02800	S-formylglutathione hydrolase	-0.891925	10.4667	-5.25437	7.77272e-05	0.00139307	1.42081
tetur19g02390	Hypothetical protein	-0.892131	13.5443	-4.61862	0.000282118	0.00328368	0.124617
tetur09g04800	Gamma-interferon-inducible lysosomal thiol reductase precursor	-0.892751	14.6609	-4.58729	0.000300953	0.00341033	0.0598226
tetur33g00930	PREDICTED: similar to conserved hypothetical protein	-0.894664	12.7674	-6.86449	3.73144e-06	0.000191291	4.48687
tetur01g08670	PREDICTED: similar to inorganic phosphate cotransporter; putative	-0.898898	8.677	-4.09981	0.000831214	0.00693624	-0.955345
tetur08g02510	BRCT	-0.905191	12.8716	-8.90192	1.31222e-07	1.7933e-05	7.8556
tetur05g03220	Homeobox, conserved site	-0.909963	9.33111	-4.92323	0.000151278	0.00217019	0.750434
tetur08g04590	EGF-like; type 3	-0.919642	7.84964	-3.79574	0.00157798	0.0109524	-1.59178
tetur17g00510	lipase 1 precursor	-0.921462	8.32208	-3.63832	0.0022014	0.0137178	-1.92073
tetur22g01680	Secreted Protein of Unknown Function; family A	-0.924957	9.66507	-6.44973	7.88861e-06	0.000310731	3.73062
tetur25g01900	Hypothetical protein	-0.926302	14.7655	-3.57559	0.00251392	0.0150318	-2.05153
tetur07g01290	Na	-0.939677	9.02692	-7.54318	1.15271e-06	8.41539e-05	5.67216
tetur31g01960	Hypothetical protein	-0.941304	10.3657	-4.77925	0.000202859	0.0026537	0.455596
tetur02g01530	androgen-induced gene 1 protein	-0.941998	9.63717	-7.32045	1.68338e-06	0.000113947	5.29031
tetur09g04200	Zinc finger, C2H2	-0.942299	9.19486	-3.61946	0.00229104	0.0141293	-1.96008
tetur14g01360	ferritin	-0.944299	13.5946	-3.83595	0.00144945	0.0103329	-1.50765
tetur23g00890	Cathepsin L-like	-0.946186	13.6492	-4.09711	0.000835947	0.00696325	-0.960998
tetur11g01230	UDP-glucuronosyl/UDP-glucosyltransferase	-0.95619	8.20159	-5.38286	6.02405e-05	0.00117798	1.67773
tetur13g04460	3-oxoacyl-acyl-carrier-protein reductase	-0.965699	7.72126	-4.56662	0.000314073	0.00349829	0.0170543
tetur09g04250	DMRT/protein doublesex/protein male abnormal 3	-0.968556	8.69044	-5.38857	5.95649e-05	0.0011728	1.6891
tetur02g08840	Cathepsin L	-0.975505	12.3989	-5.23263	8.11677e-05	0.00143085	1.37716
tetur07g02730	Hypothetical protein	-0.977584	13.385	-3.08524	0.00707218	0.0318317	-3.06219
tetur02g11180	Superoxide dismutase; copper/zinc binding	-0.984665	13.3174	-2.94562	0.00946874	0.0392252	-3.34401
tetur13g00990	Orphan secreted protein; possibly fibroin	-0.986926	11.9301	-3.83777	0.00144389	0.0103142	-1.50384
tetur31g00420	PREDICTED: DDB1- and CUL4-associated factor 17 isoform 1	-0.99073	11.646	-5.98383	1.8811e-05	0.000545322	2.85261
tetur22g00270	UDP-glycosyltransferase; teturUGT59	-1.00565	8.32699	-4.1413	0.000761858	0.00655321	-0.868566
tetur10g04830	geranylgeranyl pyrophosphate synthase	-1.00676	14.0141	-6.88658	3.58793e-06	0.000187379	4.52647
tetur01g10820	Carboxyl/cholinesterase	-1.0093	8.36995	-6.63923	5.58715e-06	0.000242702	4.07913
tetur37g00740	Hypothetical protein	-1.00961	8.94246	-7.74931	8.16649e-07	6.77109e-05	6.01943
tetur14g03430	Hypothetical protein	-1.01106	9.88616	-2.93283	0.00972437	0.0399754	-3.36965
tetur02g11530	Aldo-keto reductase family D; member 2	-1.01766	11.9388	-6.1081	1.48759e-05	0.000467185	3.08971
tetur03g07450	Apple-like	-1.01989	10.3449	-6.25187	1.13687e-05	0.000397306	3.36137
tetur08g05590	Kr-2; Ortholog of Drosophila melanogaster Kruppel	-1.02798	10.7054	-6.63102	5.6707e-06	0.000244806	4.06413
tetur11g05700	Hypothetical protein	-1.03438	10.1844	-4.66384	0.000257035	0.00308177	0.218004
tetur27g00350	Cytochrome P450 - CYP392E8	-1.03768	12.3625	-5.04917	0.000117257	0.00183993	1.00672
tetur09g05660	protein-glutamine gamma-glutamyltransferase K	-1.0394	13.5334	-3.46193	0.00319722	0.0178539	-2.28788
tetur05g05600	Highly expressed secreted protein family	-1.04059	9.36287	-7.42782	1.40135e-06	9.8689e-05	5.47525
tetur11g05760	Carboxyl/cholinesterase	-1.04064	8.34837	-3.43968	0.00335124	0.0185167	-2.33403
tetur09g00110	methyltransferase type 11	-1.04337	14.9504	-2.9356	0.0096683	0.0398253	-3.36409
tetur05g00090	UDP-glycosyltransferase; teturUGT23	-1.05091	8.30188	-5.6674	3.45138e-05	0.000793887	2.23971
tetur20g00750	Hypothetical protein	-1.06556	7.23278	-3.65171	0.00213992	0.013475	-1.89279
tetur21g03250	Hypothetical protein	-1.07337	8.21422	-4.03911	0.000944386	0.00752917	-1.08237
tetur01g10430	sodium-dependent glucose transporter 1	-1.09532	7.55035	-3.39063	0.00371737	0.0200755	-2.43565
tetur06g05080	short-chain dehydrogenase/reductase SDR	-1.10611	10.5691	-3.07546	0.00721877	0.032283	-3.08206
tetur25g00520	Hypothetical protein	-1.11512	12.761	-2.92736	0.00983572	0.040267	-3.3806
tetur17g03230	Alpha/Beta hydrolase fold	-1.11642	10.8116	-2.80724	0.0126182	0.0485108	-3.61953
tetur02g14480	Short-chain dehydrogenase/reductase SDR	-1.11941	8.55963	-8.43712	2.68949e-07	3.17816e-05	7.13627
tetur04g05830	acid phosphatase-1	-1.13055	9.7476	-4.7851	0.000200444	0.00263612	0.467623
tetur01g09880	Hypothetical protein	-1.13907	11.4144	-5.38434	6.00638e-05	0.00117631	1.68069
tetur04g00520	Hypothetical protein	-1.16986	9.69999	-4.48195	0.000374236	0.00392948	-0.158498
tetur10g00730	PREDICTED: similar to AGAP003501-PA	-1.1857	12.9906	-6.78394	4.30748e-06	0.00020641	4.34188
tetur20g00560	Hypothetical protein	-1.18955	12.3116	-6.75985	4.49713e-06	0.00021043	4.29836
tetur39g00720	Vitellogenin 6	-1.19837	15.1779	-3.16336	0.00600244	0.0283722	-2.90309
tetur95g00050	Hypothetical protein	-1.20857	13.9761	-3.70789	0.0019001	0.0123942	-1.77546
tetur22g02750	Small Secreted Protein; family A	-1.21181	8.46974	-5.0746	0.0001114	0.00179166	1.05829
tetur07g00820	proprotein convertase subtilisin/kexin type 1	-1.21808	13.3067	-4.17481	0.000710158	0.00625308	-0.798531
tetur23g00120	PAN/Apple domain	-1.21918	6.82265	-6.73536	4.69901e-06	0.000216781	4.254
tetur01g03880	Methyltransferase type 11	-1.23396	8.77777	-4.13211	0.000776703	0.00664439	-0.887792
tetur05g01470	Hypothetical protein	-1.24841	14.1974	-2.9978	0.00849219	0.0363459	-3.2391
tetur20g00720	Hypothetical protein	-1.25078	8.29675	-6.20811	1.23347e-05	0.000417462	3.27898
tetur40g00210	Hypothetical protein	-1.25424	13.3346	-3.73998	0.00177541	0.0118678	-1.70839
tetur30g01350	PREDICTED: ectonucleotide pyrophosphatase/phosphodiesterase 5	-1.25694	12.0523	-3.2394	0.00511489	0.0251478	-2.7474
tetur26g01510	Glutathione S-transferase; class delta	-1.25818	9.91899	-7.68624	9.06941e-07	7.14485e-05	5.9138
tetur01g13180	M13 family peptidase	-1.25886	10.1162	-4.5347	0.000335505	0.00363786	-0.049086
tetur09g04470	Cathepsin L-like	-1.26339	14.3613	-6.06404	1.61629e-05	0.000497571	3.00588
tetur03g07020	Apple-like	-1.26988	7.22603	-9.02801	1.08484e-07	1.62656e-05	8.04599
tetur06g05100	3-oxoacyl-acyl-carrier-protein reductase	-1.27348	12.8871	-6.52177	6.91505e-06	0.000280301	3.8637
tetur05g05610	Highly expressed secreted protein family	-1.31701	9.11529	-5.26879	7.55273e-05	0.00137487	1.44974
tetur30g01730	Hypothetical protein	-1.32871	14.847	-3.5415	0.00270191	0.0158628	-2.1225
tetur12g00620	C-factor	-1.33741	11.1277	-6.25396	1.13246e-05	0.00039676	3.3653
tetur28g00360	beta-mannosidase	-1.33895	13.0869	-6.3439	9.58521e-06	0.000354526	3.53379
tetur03g02740	PREDICTED: similar to adenylate cyclase	-1.36052	11.7703	-6.73657	4.68876e-06	0.000216781	4.25621
tetur24g02340	Nitrilase/cyanide hydratase and apolipoprotein N-acyltransferase	-1.39822	12.7589	-3.81785	0.00150597	0.0105896	-1.54553
tetur05g05630	Geneb-a protein	-1.40909	7.01693	-7.64551	9.70757e-07	7.45889e-05	5.84529
tetur02g12430	BTB/Kelch-associated	-1.40916	7.86352	-5.35568	6.35659e-05	0.00121753	1.62355
tetur04g09459	Small Secreted Protein; Family F	-1.41591	13.8784	-6.81894	4.04654e-06	0.000199727	4.405
tetur05g05640	Highly Expressed Secreted Protein Family	-1.41742	9.48727	-5.73682	3.01772e-05	0.000734365	2.37526
tetur17g02900	Phytanoyl-CoA dioxygenase	-1.4189	8.16976	-7.02888	2.79146e-06	0.000158626	4.77992
tetur21g03160	Calycin-like	-1.431	8.51248	-6.04401	1.67855e-05	0.000509929	2.9677
tetur01g03820	UDP-glycosyltransferase; teturUGT01	-1.43242	7.83197	-3.78924	0.00159981	0.0110435	-1.60538
tetur24g02330	nitrilase homolog 1	-1.43552	12.8521	-3.64169	0.00218574	0.0136611	-1.91369
tetur26g01230	phosphatidylethanolamine-binding protein	-1.44012	10.9952	-2.8313	0.0120059	0.0467067	-3.57194
tetur13g01730	Hypothetical protein	-1.44328	14.4747	-4.60335	0.000291142	0.00335234	0.0930485
tetur02g09750	Orfan gene family A; member-17	-1.46545	7.46246	-5.22274	8.27852e-05	0.00144656	1.35728
tetur17g03400	Domain of unknown function DUF3421	-1.4933	11.3746	-7.76872	7.90795e-07	6.68293e-05	6.05183
tetur35g00210	Carboxyl/cholinesterase	-1.4955	9.29072	-9.92911	2.93279e-08	5.92679e-06	9.35003
tetur05g09325	UDP-glucuronosyl/UDP-glucosyltransferase	-1.51747	9.25496	-3.2687	0.00480855	0.0239894	-2.6872
tetur04g02440	PREDICTED: similar to adenylate cyclase	-1.53408	8.10459	-6.30194	1.03591e-05	0.000374005	3.45534
tetur43g00560	Hypothetical protein	-1.56806	9.45902	-4.55417	0.000322263	0.00356355	-0.00874185
tetur24g00170	photosystem II CP47 protein	-1.59009	7.24117	-9.63144	4.47395e-08	8.31797e-06	8.92997
tetur02g14410	Legumain	-1.6268	8.98518	-3.76359	0.00168896	0.0114547	-1.65902
tetur01g00490	intradiol ring-cleavage dioxygenase	-1.65663	10.1336	-8.90086	1.31434e-07	1.7933e-05	7.85399
tetur123g00050	Cathepsin L	-1.66671	13.7091	-7.78381	7.71287e-07	6.6349e-05	6.07698
tetur06g02820	Cytochrome P450 - CYP392E3	-1.67154	9.4053	-13.0402	5.84036e-10	2.54494e-07	13.187
tetur12g00580	Hypothetical protein	-1.68966	8.17662	-11.3833	4.23106e-09	1.22912e-06	11.2617
tetur09g00480	Domain of unknown function DUF3421	-1.6931	9.52289	-7.77205	7.86454e-07	6.68293e-05	6.05737
tetur02g14460	PAN/Apple domain	-1.77248	8.88995	-6.37637	9.02767e-06	0.000336791	3.59434
tetur09g04920	apolipoprotein D precursor	-1.79378	10.2487	-3.56144	0.00259031	0.0153596	-2.081
tetur03g09800	ABC-transporter; class C;	-1.80129	12.0094	-10.346	1.64858e-08	3.7077e-06	9.92135
tetur01g05480	Cathepsin B	-1.8518	15.2035	-13.197	4.89552e-10	2.22495e-07	13.3569
tetur23g01050	lipase 1 precursor	-1.86625	11.8775	-7.97457	5.6389e-07	5.46034e-05	6.39224
tetur12g00570	C-signal	-1.89107	9.87262	-9.95049	2.8462e-08	5.83639e-06	9.37981
tetur21g03190	Calycin-like	-1.89491	8.46015	-11.9029	2.22007e-09	7.55042e-07	11.8924
tetur11g00040	magnesium transporter NIPA2	-1.90421	10.6822	-12.4185	1.19687e-09	4.76834e-07	12.4934
tetur28g01730	3-oxoacyl-acyl-carrier-protein reductase	-1.91751	14.4349	-7.92082	6.15627e-07	5.92021e-05	6.30391
tetur614g00010	Hypothetical protein	-1.93603	10.4683	-5.04896	0.000117305	0.00183993	1.00631
tetur01g13320	Small Secreted Protein; family A	-1.93928	13.1399	-2.87585	0.0109469	0.0437249	-3.48343
tetur184g00010	Hypothetical protein	-2.0105	9.65629	-6.64854	5.49392e-06	0.000239398	4.09613
tetur06g05070	short-chain dehydrogenase/reductase SDR	-2.04349	9.19282	-9.50248	5.38802e-08	9.51747e-06	8.74476
tetur11g01560	Carboxyl/cholinesterase	-2.12597	11.0361	-9.77608	3.63965e-08	7.14808e-06	9.13538
tetur01g16463	Peptidase C1A, papain C-terminal	-2.15071	10.1721	-12.1494	1.6478e-09	6.1882e-07	12.1828
tetur17g02390	Concanavalin A-like lectin/glucanase	-2.19152	10.7383	-11.0942	6.11992e-09	1.5803e-06	10.8992
tetur08g07920	Hypothetical protein	-2.27682	10.5811	-5.98719	1.86913e-05	0.000544116	2.85906
tetur16g01140	Hypothetical protein	-2.28935	9.06289	-7.71325	8.67054e-07	6.86943e-05	5.95911
tetur28g01130	short chain dehydrogenase	-2.31048	10.6248	-5.50342	4.75163e-05	0.000994786	1.91705
tetur63g00050	hypothetical phage protein	-2.40153	9.99324	-4.9115	0.000154925	0.00221114	0.726478
tetur22g02670	hypothetical phage protein	-2.41719	10.4432	-4.68084	0.000248209	0.00302009	0.253061
tetur22g02040	LY6_UPAR protein	-2.43846	11.5283	-3.95763	0.0011212	0.00850095	-1.25293
tetur21g01430	Hypothetical protein	-2.53525	12.0614	-5.20177	8.63248e-05	0.00149902	1.3151
tetur22g02640	Insect antifreeze protein	-2.74791	10.5033	-8.07051	4.82563e-07	4.81767e-05	6.54891
tetur05g05020	UDP-glycosyltransferase; teturUGT26	-2.76011	8.88355	-9.70667	4.0175e-08	7.78056e-06	9.0371
tetur06g05090	short chain dehydrogenase	-2.85726	9.84458	-11.8015	2.51332e-09	8.34421e-07	11.7713
tetur05g05030	UDP-glycosyltransferase; teturUGT27	-2.90256	8.97059	-11.9264	2.1574e-09	7.5207e-07	11.9203
tetur17g03390	Domain of unknown function DUF3421	-2.9209	9.57123	-19.8067	1.0391e-12	2.89785e-09	19.0324
tetur07g05940	intradiol ring-cleavage dioxygenase	-3.01501	10.2558	-5.92704	2.09551e-05	0.000583222	2.74357
tetur13g04170	GE26306	-3.07394	11.903	-7.72417	8.51457e-07	6.86284e-05	5.97739
tetur09g06670	protein midA homolog; mitochondrial precursor	-3.09767	16.0616	-3.47472	0.00311191	0.0174899	-2.26133
tetur12g00590	C-factor	-3.2852	9.16368	-19.2467	1.61824e-12	3.63951e-09	18.6435
tetur06g05110	3-oxoacyl-acyl-carrier-protein reductase	-3.33598	12.751	-13.4801	3.57576e-10	1.78073e-07	13.6584
tetur24g00160	Hypothetical protein	-3.49515	9.03849	-15.8729	3.0853e-11	2.39008e-08	15.9716
tetur17g00080	Carboxyl/cholinesterase	-3.60375	9.03686	-15.0234	7.07951e-11	4.97744e-08	15.1957
tetur22g02790	Insect antifreeze protein	-3.83348	10.0901	-16.5713	1.60451e-11	1.59809e-08	16.5758
tetur22g03073	Zinc finger, CXXC-type	-4.31074	10.972	-12.7135	8.48424e-10	3.58498e-07	12.8267
tetur24g00200	Apple-like	-4.6307	9.93029	-14.7728	9.11682e-11	5.7784e-08	14.9577
tetur11g05720	Lipase/lipooxygenase; PLAT/LH2	-6.76193	13.6092	-18.0484	4.35109e-12	6.74129e-09	17.7626
tetur11g05730	PLAT/LH2 domain	-7.16106	13.2541	-17.619	6.29336e-12	7.9777e-09	17.4297
tetur03g03670	Hypothetical protein	-7.52206	15.5515	-27.9121	4.89017e-15	6.81885e-11	23.4032
* T. urticae IDs can be accessed at the ORCAE database (Sterck et al. 2012, doi: 10.1038/nmeth.2242) available at http://bioinformatics.psb.ugent.be/orcae/overview/Tetur

## Sheet: tomato
Table S1 - Differential gene expression analysis of the different T. urticae host plant populations. Differentially expressed genes (absolute log2FC ≥ 0.585 and Benjamini-Hochberg adjusted p-value < 0.05) between adult T. urticae females of the tomato (Solanum lycopersicum) population compared to adult T. urticae females of the parental population on common bean (Phaseolus vulgaris)
T.urticae gene ID*	description	log2 FC	AveExpr	t	P.Value	adj.P.Val	B
tetur11g05410	PREDICTED: similar to adenylate cyclase	7.25838	7.82528	50.4654	4.03444e-19	1.87521e-15	33.3068
tetur11g05440	Lipase/lipooxygenase; PLAT/LH2	6.85517	7.38062	42.3264	6.66203e-18	1.16119e-14	30.9303
tetur31g00810	Hypothetical protein	6.04019	8.87595	11.247	5.03025e-09	1.69016e-07	10.7637
tetur03g08010	Cathepsin B	5.22428	13.4363	14.9454	7.65648e-11	5.56052e-09	15.0913
tetur07g08034	Serine proteases, trypsin family, histidine active site	5.21246	6.58092	76.9169	4.77046e-22	6.65193e-18	38.2038
tetur11g05010	Hypothetical protein	5.02094	7.6008	14.0533	1.92484e-10	1.18238e-08	14.1413
tetur20g00290	Cytochrome P450 - CYP392B3	4.77991	11.8023	40.7378	1.22479e-17	1.89761e-14	30.3933
tetur11g05100	adenylate cyclase	4.74842	9.52334	17.2054	9.05027e-12	9.93677e-10	17.2815
tetur03g02680	PREDICTED: similar to adenylate cyclase	4.59262	8.10586	16.0623	2.57758e-11	2.24636e-09	16.21
tetur31g00690	Cysteine peptidase, asparagine active site	4.55317	10.2534	7.34916	1.60258e-06	1.89537e-05	4.77765
tetur31g00830	methyl-accepting chemotaxis sensory transducer	4.50777	7.36903	8.70633	1.76926e-07	3.19981e-06	7.0655
tetur11g05550	PREDICTED: similar to ENSANGP00000027535	4.37129	7.33859	20.8717	4.6167e-13	9.38653e-11	20.3012
tetur30g02020	Apple-like	4.33668	6.95609	32.9135	3.6194e-16	2.94978e-13	27.2941
tetur03g02880	PREDICTED: similar to adenylate cyclase	4.25256	7.59604	13.8521	2.3864e-10	1.3923e-08	13.9195
tetur86g00060	Calycin-like	4.16667	7.53884	17.8993	4.94123e-12	5.88894e-10	17.8991
tetur13g04550	Intradiol ring-cleavage dioxygenase, core	4.08102	8.29225	25.0946	2.60403e-14	9.24605e-12	23.168
tetur03g04990	Cytochrome P450 - CYP392D2	4.00724	7.34252	18.079	4.23937e-12	5.27801e-10	18.0552
tetur11g05230	Apolipoprotein D	3.99387	10.8008	10.2656	1.83972e-08	5.04981e-07	9.41743
tetur03g07950	Cathepsin B	3.96919	10.9111	15.6328	3.88601e-11	3.16738e-09	15.7886
tetur01g00490	intradiol ring-cleavage dioxygenase	3.93131	10.1336	21.1224	3.83535e-13	8.10305e-11	20.4878
tetur31g01860	Hypothetical protein	3.73832	8.68694	7.8188	7.27975e-07	9.92266e-06	5.59638
tetur20g00540	Hypothetical protein	3.67063	7.54608	28.1742	4.22062e-15	2.17972e-12	24.9476
tetur06g02580	Cathepsin B	3.64741	8.90747	6.57477	6.27931e-06	5.88828e-05	3.36314
tetur03g02890	PREDICTED: similar to adenylate cyclase	3.59319	9.86018	22.4774	1.45759e-13	3.62939e-11	21.4578
tetur46g00150	Cytochrome P450 - CYP385C4v2	3.58964	10.0115	15.8977	3.0133e-11	2.53117e-09	16.0498
tetur12g00700	Small Secreted Protein; Family F	3.41054	9.18774	14.6005	1.08713e-10	7.32316e-09	14.7303
tetur16g03190	Serine protease homologue	3.39489	9.4095	9.08271	9.9945e-08	2.02858e-06	7.65894
tetur28g01250	intradiol ring-cleavage dioxygenase	3.39303	12.5936	12.3545	1.29081e-09	5.43774e-08	12.1739
tetur06g02590	Serine protease homologue	3.36976	10.0914	10.252	1.87443e-08	5.10105e-07	9.39802
tetur196g90150	hypothetical protein	3.36168	6.75226	19.5458	1.27537e-12	2.0922e-10	19.2751
tetur06g04580	Hypothetical protein	3.35356	6.73865	47.6176	1.01933e-18	2.84272e-15	32.5399
tetur16g03330	Serine protease homologue	3.26719	9.51214	11.4745	3.77172e-09	1.32476e-07	11.0625
tetur03g09997	Peptidase C1A, papain C-terminal	3.20987	10.5352	9.08147	1.00132e-07	2.02942e-06	7.657
tetur22g00690	minor tail protein gp26-like	3.20373	8.1246	13.4309	3.77495e-10	1.96005e-08	13.4459
tetur101g00010	intraflagellar transport protein 81 homolog	3.1762	6.83384	21.0164	4.14716e-13	8.63105e-11	20.4092
tetur31g01520	intraflagellar transport protein 81 homolog	3.1739	7.87902	19.7597	1.07795e-12	1.90265e-10	19.4454
tetur39g00730	vitellogenin1	3.13007	11.3205	8.08611	4.70541e-07	6.8776e-06	6.04944
tetur06g01580	Glycoside hydrolase; subgroup; catalytic core	3.05046	11.0052	6.35652	9.36436e-06	8.13561e-05	2.94996
tetur22g02500	CS domain	3.00113	10.4198	23.0011	1.01764e-13	2.78235e-11	21.8164
tetur16g90599	hypothetical protein	2.9833	6.51038	14.217	1.6192e-10	1.02814e-08	14.3197
tetur02g01370	glycogen debranching enzyme	2.90695	7.98649	11.5439	3.45806e-09	1.23323e-07	11.1525
tetur17g00790	Glycoside hydrolase; subgroup; catalytic core	2.89939	10.5674	15.4086	4.8338e-11	3.78666e-09	15.5644
tetur03g02780	PREDICTED: similar to adenylate cyclase	2.89632	6.61473	29.1539	2.46226e-15	1.37335e-12	25.4683
tetur30g02040	phospholipid scramblase 1	2.89303	7.94181	10.6859	1.04407e-08	3.13328e-07	10.0058
tetur07g05940	intradiol ring-cleavage dioxygenase	2.87795	10.2558	5.6576	3.51766e-05	0.000240797	1.58508
tetur22g00270	UDP-glycosyltransferase; teturUGT59	2.81493	8.32699	11.5919	3.25671e-09	1.1704e-07	11.2147
tetur08g05010	Cathepsin B	2.81174	14.6977	23.7374	6.21991e-14	1.92734e-11	22.3063
tetur30g02000	phospholipid scramblase 2	2.80999	6.70144	25.1671	2.4888e-14	9.13257e-12	23.2127
tetur11g06390	hypothetical protein	2.73367	15.568	16.9038	1.18553e-11	1.22452e-09	17.0055
tetur447g00010	Hypothetical protein	2.71163	9.09561	11.5373	3.48637e-09	1.24015e-07	11.1441
tetur30g01960	ABC-transporter; class A;	2.70972	6.77386	13.5472	3.32177e-10	1.7953e-08	13.578
tetur18g01440	Peptidase M16; core	2.68436	9.46268	15.2838	5.46447e-11	4.15192e-09	15.4383
tetur29g00220	Glutathione S-transferase; class delta	2.64724	10.2014	13.0649	5.67968e-10	2.72156e-08	13.0236
tetur14g02720	Hypothetical protein	2.56098	11.1849	5.52654	4.54127e-05	0.000296319	1.3224
tetur05g07910	Mitogen-activated protein-binding protein-interacting protein	2.52752	9.55144	19.529	1.29242e-12	2.09553e-10	19.2617
tetur04g06770	Carboxyl/cholinesterase	2.52096	8.58331	14.9602	7.54291e-11	5.50672e-09	15.1067
tetur12g00120	C-factor	2.50269	10.0898	14.1361	1.7633e-10	1.10754e-08	14.2318
tetur28g02490	Aldehyde dehydrogenase; N-terminal	2.49136	11.0357	12.827	7.44493e-10	3.43749e-08	12.7436
tetur16g03470	Serine protease homologue	2.47846	11.1176	11.3934	4.1772e-09	1.43113e-07	10.9565
tetur30g00040	Hypothetical protein	2.46194	8.57251	10.698	1.02744e-08	3.10772e-07	10.0224
tetur23g00070	Hypothetical protein	2.4537	6.34928	31.0322	9.18491e-16	5.73555e-13	26.4129
tetur05g06410	putative liporotein	2.40424	7.03607	17.7409	5.66246e-12	6.57978e-10	17.7602
tetur92g00010	Fibroin (new)	2.3937	9.75628	13.2385	4.67364e-10	2.31096e-08	13.2252
tetur09g00500	Domain of unknown function DUF3421	2.38442	6.98267	16.0203	2.68208e-11	2.30857e-09	16.1692
tetur01g12320	PSP; proline-rich	2.36352	9.4193	19.6054	1.21682e-12	2.01991e-10	19.3227
tetur16g03200	PREDICTED: similar to adenylate cyclase	2.34391	8.16212	12.0087	1.95233e-09	7.7339e-08	11.7452
tetur20g03210	PREDICTED: similar to adenylate cyclase	2.32865	8.27014	14.0724	1.88628e-10	1.16382e-08	14.1622
tetur01g04020	Fibroin	2.30799	12.5283	12.2172	1.51956e-09	6.25035e-08	12.0049
tetur02g09990	P-loop containing nucleoside triphosphate hydrolase	2.27767	11.1637	16.1101	2.46403e-11	2.18844e-09	16.2562
tetur28g00360	beta-mannosidase	2.21664	13.0869	10.5024	1.33425e-08	3.82959e-07	9.75109
tetur13g04350	PREDICTED: similar to F55A4.8a	2.20041	10.247	32.8082	3.8078e-16	2.94978e-13	27.2464
tetur11g05520	Cytochrome P450 - CYP385C4	2.1816	10.2346	10.7815	9.19961e-09	2.80699e-07	10.1371
tetur20g00740	Hypothetical protein	2.17165	7.18236	6.70743	4.94071e-06	4.79424e-05	3.6112
tetur16g03630	Hypothetical protein	2.16776	6.76015	5.88611	2.26565e-05	0.000168671	2.03812
tetur49g00080	Armadillo-type fold	2.14859	12.0157	11.2702	4.88403e-09	1.645e-07	10.7943
tetur16g01140	Hypothetical protein	2.13639	9.06289	7.1979	2.07921e-06	2.35138e-05	4.5077
tetur09g03090	Hypothetical protein	2.13465	12.434	7.21516	2.01803e-06	2.29523e-05	4.53866
tetur08g08369	hypothetical protein	2.10031	8.61526	7.05409	2.67082e-06	2.8937e-05	4.24819
tetur31g02020	Apple-like	2.09586	8.41957	16.2179	2.22673e-11	2.02938e-09	16.36
tetur07g01660	PREDICTED: hypothetical protein	2.08466	16.5611	15.5142	4.35993e-11	3.47399e-09	15.6704
tetur03g02820	PREDICTED: similar to adenylate cyclase	2.05767	6.73081	14.2922	1.49654e-10	9.66097e-09	14.4009
tetur32g00960	Hypothetical protein	2.02653	8.0285	10.9007	7.86748e-09	2.45973e-07	10.2995
tetur07g01800	Zinc finger, C2H2-like	2.0182	7.62585	13.6635	2.92606e-10	1.6452e-08	13.709
tetur03g05000	Cytochrome P450 - CYP392D3	2.01204	10.367	6.61501	5.8373e-06	5.53333e-05	3.43865
tetur03g00720	Cytochrome P450	1.98652	10.4442	23.693	6.40464e-14	1.94144e-11	22.2772
tetur623g00010	PREDICTED: similar to adenylate cyclase	1.97306	7.35563	14.045	1.94198e-10	1.18402e-08	14.1322
tetur30g02200	PREDICTED: hypothetical protein	1.96575	13.8555	5.50512	4.7359e-05	0.000307294	1.27927
tetur03g08030	Cathepsin B	1.9481	12.2111	10.9956	6.95223e-09	2.22855e-07	10.4279
tetur02g14100	Hypothetical protein	1.93413	9.05662	16.9955	1.0916e-11	1.14446e-09	17.09
tetur26g00580	Six-bladed beta-propeller, TolB-like	1.91005	7.11927	11.4178	4.05056e-09	1.39728e-07	10.9885
tetur08g06890	solute carrier family 17	1.90598	8.63691	7.38482	1.50785e-06	1.80321e-05	4.84085
tetur05g04920	PREDICTED: similar to ileal sodium-dependent bile acid transporter	1.89599	7.2363	11.9714	2.04251e-09	8.02276e-08	11.6984
tetur36g01060	UDP-glycosyltransferase; teturUGT77	1.89232	11.8106	11.2146	5.24268e-09	1.75309e-07	10.7208
tetur29g00930	Carboxyl/cholinesterase	1.88532	9.70774	14.0969	1.83794e-10	1.13903e-08	14.189
tetur03g02710	Scramblase	1.88459	11.4952	8.53653	2.3018e-07	3.90941e-06	6.79212
tetur03g05030	Cytochrome P450 - CYP392D6	1.88418	10.4266	4.233	0.000628659	0.00260816	-1.35976
tetur02g15167	Serine proteases, trypsin family, histidine active site	1.86268	6.96311	5.86318	2.36714e-05	0.000173998	1.99297
tetur01g13270	Small Secreted Protein; family A	1.84568	14.0124	8.38416	2.92346e-07	4.75668e-06	6.54376
tetur21g01170	dimethylaniline monooxygenase	1.82778	7.49675	5.27006	7.53363e-05	0.000450467	0.802672
tetur11g03410	Hypothetical protein	1.76094	6.2881	10.8788	8.09576e-09	2.51981e-07	10.2698
tetur248g00020	Leucine-rich repeat domain, L domain-like	1.74547	6.48989	9.7478	3.78887e-08	9.10896e-07	8.66687
tetur15g00300	Beta;beta-carotene 9';10'-oxygenase; CMO-II	1.74502	9.09382	20.4985	6.10738e-13	1.15083e-10	20.0193
tetur09g01190	fatty acid ELOngation family member	1.73309	6.64604	7.26633	1.84746e-06	2.122e-05	4.63021
tetur03g09800	ABC-transporter; class C;	1.72929	12.0094	9.93248	2.91895e-08	7.29424e-07	8.93788
tetur08g01910	mitochondrial sodium/hydrogen exchanger NHA2	1.72728	8.37233	4.54513	0.000328339	0.00154414	-0.701019
tetur25g00860	Hypothetical protein	1.72703	7.51074	6.91981	3.38284e-06	3.50708e-05	4.00337
tetur25g01180	conserved hypothetical protein	1.72604	7.3613	7.28167	1.79932e-06	2.07869e-05	4.65759
tetur180g00010	Hypothetical protein	1.72259	7.25367	12.4271	1.18481e-09	5.10559e-08	12.2626
tetur08g04870	PREDICTED: similar to adenylate cyclase	1.71785	7.20392	10.0787	2.38027e-08	6.16923e-07	9.14983
tetur03g09640	Hypothetical protein	1.69746	13.9795	11.6648	2.97501e-09	1.09167e-07	11.3085
tetur32g01960	Carbonyl reductase [NADPH] 1	1.69544	9.59714	7.00323	2.9201e-06	3.09878e-05	4.15574
tetur04g00200	MAP1B protein	1.67014	7.24894	18.3595	3.34657e-12	4.28115e-10	18.2959
tetur21g00410	sodium-dependent glucose transporter 1	1.66405	8.77574	11.843	2.38864e-09	9.07552e-08	11.5362
tetur20g01230	vitellogenin	1.66256	10.7965	2.94577	0.0094658	0.0252099	-4.05782
tetur07g00480	ras-related protein Rab-40B	1.65677	7.30856	11.6453	3.04776e-09	1.10961e-07	11.2835
tetur10g01990	Hypothetical protein	1.65566	10.0535	13.3748	4.01613e-10	2.04383e-08	13.3819
tetur30g01760	sensory box protein/histidinol phosphate phosphatase family protein	1.63618	8.61301	4.35733	0.0004849	0.00210799	-1.09685
tetur31g01330	Glutathione S-transferase; class delta	1.63557	10.9275	4.81464	0.000188707	0.000968111	-0.136828
tetur11g00960	Hypothetical protein	1.61341	8.4739	13.2548	4.58919e-10	2.27728e-08	13.244
tetur26g02540	queuine tRNA-ribosyltransferase	1.61109	9.61274	12.4115	1.2068e-09	5.17773e-08	12.2436
tetur17g01400	Hypothetical protein	1.60077	6.49698	13.6069	3.11181e-10	1.71506e-08	13.6454
tetur28g01130	short chain dehydrogenase	1.58922	10.6248	3.78544	0.00161273	0.00569316	-2.30828
tetur11g02480	PREDICTED: similar to sodium-dependent phosphate transporter	1.58682	8.8338	4.67674	0.000250308	0.00122811	-0.424861
tetur04g00870	Hypothetical protein	1.57438	8.19038	8.38337	2.9271e-07	4.75705e-06	6.54247
tetur37g00660	poly	1.56835	8.09167	11.9934	1.98875e-09	7.85584e-08	11.7261
tetur33g01430	PAN/Apple domain	1.56277	9.03742	16.136	2.40458e-11	2.14934e-09	16.2813
tetur11g01710	Carboxyl/cholinesterase; incomplete	1.55918	14.3465	4.36923	0.000473021	0.00206444	-1.07171
tetur06g04210	CCAAT/enhancer binding protein alpha	1.554	8.77842	9.55447	4.99786e-08	1.1615e-06	8.3791
tetur38g91432	hypothetical protein	1.54742	9.44201	11.1493	5.70041e-09	1.87468e-07	10.634
tetur01g10750	Carboxyl/cholinesterase	1.53721	7.68134	5.45073	5.26959e-05	0.000336135	1.16955
tetur13g92980	hypothetical protein	1.53402	8.66933	13.0699	5.64732e-10	2.71539e-08	13.0295
tetur09g00480	Domain of unknown function DUF3421	1.52845	9.52289	7.01625	2.85403e-06	3.04178e-05	4.17945
tetur114g00010	myosin light chain kinase; smooth muscle	1.51845	8.71589	13.3974	3.91695e-10	2.01542e-08	13.4077
tetur06g02400	Cytochrome P450 - CYP392E2	1.51626	8.01436	7.68724	9.05432e-07	1.18826e-05	5.36997
tetur02g07470	Orfan gene family B; member-13	1.50093	6.4662	10.9414	7.45995e-09	2.36413e-07	10.3547
tetur31g00630	Armadillo-type fold	1.47897	14.0691	6.94993	3.20748e-06	3.35775e-05	4.0585
tetur01g03800	Low-density lipoprotein (LDL) receptor class A, conserved site	1.47848	8.9911	13.9086	2.24596e-10	1.31587e-08	13.9821
tetur10g02030	laminin A	1.47359	9.46855	8.80999	1.50926e-07	2.83628e-06	7.23065
tetur07g01950	Serine proteases, trypsin family, histidine active site	1.46492	7.56859	5.77955	2.77918e-05	0.000198835	1.82765
tetur01g16564	Small Secreted Protein; Family F	1.46347	6.6012	11.6156	3.16241e-09	1.13945e-07	11.2452
tetur05g00090	UDP-glycosyltransferase; teturUGT23	1.45841	8.30188	7.86502	6.7463e-07	9.35094e-06	5.67538
tetur01g15540	Hypothetical protein	1.44899	6.69	10.0235	2.57009e-08	6.58774e-07	9.07012
tetur03g07520	Protein-tyrosine phosphatase; receptor/non-receptor type	1.44612	9.59458	7.026	2.80563e-06	3.00013e-05	4.19717
tetur05g06200	ribophorin ii	1.44428	8.16806	14.6876	9.9434e-11	6.76489e-09	14.8222
tetur03g09480	actin	1.44139	14.3264	5.77224	2.81853e-05	0.000201237	1.81317
tetur17g02090	TMP21-related	1.42318	12.0895	5.86095	2.3773e-05	0.000174652	1.98855
tetur05g02110	Leucine-rich repeat domain, L domain-like	1.42115	6.77121	13.1036	5.4368e-10	2.64149e-08	13.0688
tetur22g02180	Lipase/lipooxygenase; PLAT/LH2	1.40126	8.78172	6.88751	3.58205e-06	3.68349e-05	3.94411
tetur07g06200	Zinc finger; C2H2-like	1.40077	8.78069	12.3926	1.23394e-09	5.24575e-08	12.2206
tetur21g00520	Ankyrin repeat; sub-type	1.3949	8.28538	14.54	1.15692e-10	7.64552e-09	14.6662
tetur89g00020	Hypothetical protein	1.39413	6.72839	21.355	3.2353e-13	7.04892e-11	20.6588
tetur14g03960	PREDICTED: hypothetical protein; partial	1.39399	10.4612	9.48864	5.49723e-08	1.26282e-06	8.28014
tetur02g13040	antigen B membrane protein	1.38957	6.91221	7.51276	1.21343e-06	1.51207e-05	5.06617
tetur04g01610	Cuticle (secreted) protein; putative	1.38938	13.2676	3.0123	0.00823881	0.022473	-3.92262
tetur24g02130	Leucine-rich repeat domain, L domain-like	1.38743	9.24796	11.935	2.13481e-09	8.33833e-08	11.6526
tetur24g01670	Src homology-3; region	1.38631	6.97171	10.9929	6.97636e-09	2.23116e-07	10.4243
tetur26g00630	Lipoprotein receptor	1.38028	11.3042	9.95369	2.83347e-08	7.13176e-07	8.96876
tetur04g08890	Fibroin	1.38006	8.4055	8.53758	2.29802e-07	3.90941e-06	6.79383
tetur04g02450	cadherin	1.35852	9.33594	7.16241	2.21119e-06	2.47852e-05	4.44391
tetur04g05450	Myc-type, basic helix-loop-helix (bHLH) domain	1.35254	9.69419	12.0558	1.84426e-09	7.3686e-08	11.8042
tetur29g00480	Hypothetical protein	1.32479	7.44852	15.9459	2.87811e-11	2.44709e-09	16.0969
tetur08g06410	sialin	1.32135	10.8249	5.575	4.13096e-05	0.000273514	1.41976
tetur28g01950	ABC-transporter; class C	1.32014	8.86401	7.98582	5.53652e-07	7.85364e-06	5.88055
tetur22g00480	UDP-glycosyltransferase; teturUGT68	1.31253	7.50654	5.59444	3.97731e-05	0.000265866	1.45874
tetur20g01790	intradiol ring-cleavage dioxygenase	1.31116	14.0215	6.29114	1.05689e-05	9.00258e-05	2.82494
tetur09g04200	Zinc finger, C2H2	1.30544	9.19486	5.01431	0.000125801	0.000688717	0.27748
tetur11g06400	hypothetical protein	1.30517	15.6509	7.17416	2.16656e-06	2.43436e-05	4.46504
tetur10g02380	PHD finger protein 12	1.30361	10.1748	6.47008	7.60001e-06	6.90838e-05	3.16574
tetur20g01670	Pseudouridine synthase/archaeosine transglycosylase-like	1.29984	10.5578	7.40122	1.46627e-06	1.76613e-05	4.86984
tetur02g02310	Cold-shock protein, DNA-binding	1.29515	11.7045	8.4563	2.60969e-07	4.32179e-06	6.6617
tetur11g04440	Cystine-knot cytokine	1.291	8.37947	15.33	5.22143e-11	4.04487e-09	15.4851
tetur18g03683	Hypothetical protein	1.28799	8.45914	12.0345	1.89229e-09	7.53889e-08	11.7776
tetur02g13400	CG18265	1.28498	8.28861	13.8401	2.41737e-10	1.40449e-08	13.9062
tetur10g00440	protein O-mannosyl-transferase 2	1.27669	10.7974	18.067	4.28271e-12	5.28479e-10	18.0448
tetur07g05780	Scramblase	1.27624	8.07908	6.7442	4.62509e-06	4.53851e-05	3.67952
tetur02g12860	boule	1.27518	10.9525	7.32724	1.66391e-06	1.95135e-05	4.73871
tetur07g00020	PREDICTED: similar to AGAP008646-PA	1.26604	9.76832	8.31811	3.24557e-07	5.12355e-06	6.43519
tetur04g03270	guanine nucleotide-binding protein G	1.26518	7.59292	10.6757	1.05828e-08	3.14414e-07	9.99171
tetur13g00020	PREDICTED: similar to Serine/threonine-protein kinase PAK 2	1.26502	8.28117	10.1911	2.038e-08	5.46497e-07	9.31111
tetur16g01270	Synaphin	1.26127	8.85109	10.1852	2.05445e-08	5.47747e-07	9.30276
tetur39g00530	Small Secreted Protein; family C	1.2584	16.5223	7.27281	1.82698e-06	2.10212e-05	4.64177
tetur16g01010	Endoglin/CD105 antigen	1.25676	7.08576	9.11353	9.54482e-08	1.9458e-06	7.70678
tetur07g01280	Small Secreted Protein; family C	1.25457	12.4347	6.67913	5.19894e-06	5.02037e-05	3.55847
tetur02g02730	charged multivesicular body protein 2a	1.24548	7.47494	8.69407	1.803e-07	3.23565e-06	7.04588
tetur31g01890	Hypothetical protein	1.24288	9.80291	2.59156	0.0196343	0.0465851	-4.76048
tetur03g04010	paramyosin	1.24149	12.7717	7.6976	8.89935e-07	1.17401e-05	5.38788
tetur04g04390	S-RNase	1.23865	13.7249	5.54528	4.37783e-05	0.000287539	1.36008
tetur01g10390	ABC-transporter; class C;	1.23687	9.7087	6.80393	4.15633e-06	4.17851e-05	3.79014
tetur25g01070	Hypothetical protein	1.2319	6.73029	10.3269	1.69207e-08	4.74732e-07	9.50433
tetur25g01990	amyloid precursor protein like; APP like protein	1.22998	9.43901	9.23527	7.96616e-08	1.68799e-06	7.89465
tetur02g13830	Hypothetical protein	1.22694	11.4268	7.86282	6.77076e-07	9.37552e-06	5.67162
tetur10g00740	PREDICTED: similar to lipase 1	1.22233	9.31411	4.63614	0.000272115	0.00131749	-0.509928
tetur10g04950	Potassium channel tetramerisation-type BTB domain	1.21469	8.14107	10.5423	1.26453e-08	3.67345e-07	9.80682
tetur21g01580	Hypothetical protein	1.21443	6.62979	10.8712	8.17672e-09	2.53934e-07	10.2595
tetur14g03410	Zinc finger; RING-CH-type	1.21376	11.8208	13.393	3.93619e-10	2.01788e-08	13.4026
tetur03g07920	Glutathione S-transferase; delta class	1.2131	14.8631	7.52377	1.19108e-06	1.49222e-05	5.08546
tetur10g03730	Tob1 homolog [Tetranychus urticae]	1.20186	11.9639	8.94432	1.23064e-07	2.39331e-06	7.44271
tetur06g02680	PREDICTED: similar to otoferlin	1.19145	6.76943	11.0951	6.11283e-09	1.99153e-07	10.5615
tetur20g00190	Calponin-like actin-binding	1.18862	8.39172	9.36879	6.54585e-08	1.45343e-06	8.09871
tetur27g00080	Hypothetical protein	1.18643	7.79472	6.3629	9.25473e-06	8.07054e-05	2.96213
tetur21g01790	Hypothetical protein	1.18471	13.6294	4.05177	0.000919562	0.00359573	-1.74376
tetur22g01150	transmembrane protein 20	1.17938	7.67151	8.87025	1.37685e-07	2.63357e-06	7.32606
tetur39g00020	Hypothetical protein	1.17733	8.52525	9.22215	8.1223e-08	1.7082e-06	7.87448
tetur07g00970	Na+ channel, amiloride-sensitive	1.17551	6.58716	10.2524	1.87339e-08	5.10105e-07	9.39859
tetur02g04260	S-adenosyl-L-methionine-dependent methyltransferase	1.17355	9.72155	11.7979	2.52446e-09	9.4373e-08	11.4788
tetur12g04600	Carboxyl/cholinesterase	1.1707	8.62141	13.0805	5.57998e-10	2.69229e-08	13.0419
tetur08g06340	sialin	1.16728	8.60598	4.68708	0.000245044	0.0012061	-0.403208
tetur02g09960	INneXin family member	1.16452	7.78826	12.8706	7.08211e-10	3.30278e-08	12.7953
tetur01g11180	Leucine-rich repeat domain, L domain-like	1.16089	9.28461	6.64531	5.52604e-06	5.27413e-05	3.49534
tetur03g02700	Carboxyl/cholinesterase	1.15724	9.21399	8.86619	1.38539e-07	2.63561e-06	7.31963
tetur02g01240	Bicarbonate transporter; eukaryotic	1.15498	10.9269	4.82756	0.000183795	0.00094763	-0.109912
tetur16g02150	Glyoxalase/Bleomycin resistance protein/Dihydroxybiphenyl dioxygenase	1.15375	12.3251	7.63666	9.85223e-07	1.27439e-05	5.28233
tetur16g02200	Armadillo-type fold	1.15204	11.7671	11.7551	2.66076e-09	9.86744e-08	11.4243
tetur06g01930	serine/threonine-protein kinase RIO1	1.14987	11.1054	8.69875	1.79003e-07	3.22066e-06	7.05338
tetur03g07450	Apple-like	1.14918	10.3449	7.04436	2.71675e-06	2.92981e-05	4.23053
tetur04g04770	PREDICTED: adducin 1	1.14692	10.0962	8.62099	2.01853e-07	3.54557e-06	6.92856
tetur08g06660	PREDICTED: similar to Ferric-chelate reductase 1	1.14638	10.2274	6.60885	5.90284e-06	5.58407e-05	3.4271
tetur16g01090	protein kinase C eta type	1.14598	8.512	9.32682	6.96111e-08	1.53091e-06	8.0348
tetur12g03960	Picalm protein	1.14389	9.64121	11.7589	2.64832e-09	9.84752e-08	11.4292
tetur05g06440	Tudor domain	1.14049	7.33551	16.2803	2.10056e-11	1.93975e-09	16.4198
tetur04g07770	UDP-glycosyltransferase, teturUGT18	1.13788	9.74772	8.21972	3.79619e-07	5.77253e-06	6.27243
tetur05g05210	Glutathione S-transferase; class mu	1.13773	9.99702	5.40334	5.78525e-05	0.000363473	1.07367
tetur27g00220	Cytochrome P450 probable pseudogene	1.13295	10.8413	5.53469	4.46947e-05	0.000292318	1.33878
tetur13g02970	B-cell lymphoma/leukemia	1.13151	11.3448	9.17254	8.74221e-08	1.80862e-06	7.79805
tetur04g09050	Hypothetical protein	1.13136	7.64099	10.8676	8.21593e-09	2.54584e-07	10.2545
tetur05g05290	Glutathione S-transferase; class mu	1.13003	9.36658	5.90506	2.18517e-05	0.000163905	2.0754
tetur26g01340	hormone-sensitive lipase	1.12711	9.43543	9.06396	1.0279e-07	2.05458e-06	7.62978
tetur09g01980	ABC-transporter; class G	1.12533	10.3242	13.5702	3.23923e-10	1.75817e-08	13.604
tetur26g01210	Hypothetical protein	1.12457	6.35021	14.7296	9.52646e-11	6.64185e-09	14.8664
tetur21g00500	Major facilitator superfamily; general substrate transporter	1.12306	10.4041	5.80769	2.63283e-05	0.000189924	1.88337
tetur20g03437	Spt5 transcription elongation factor, N-terminal	1.11909	8.15731	8.37014	2.98889e-07	4.80477e-06	6.52077
tetur03g03970	C2 calcium-dependent membrane targeting	1.11738	7.76005	8.9544	1.21203e-07	2.36042e-06	7.45854
tetur18g03050	Hypothetical protein	1.11636	17.067	3.08389	0.00709228	0.0198186	-3.77622
tetur02g11640	putative N-acetylglucosamine-6-phosphate deacetylase	1.11582	10.957	17.9085	4.90269e-12	5.88894e-10	17.9071
tetur18g01320	Hypothetical protein	1.11395	10.9789	9.26781	7.59245e-08	1.63378e-06	7.94458
tetur05g00810	RNA binding	1.11178	8.50461	6.76698	4.44015e-06	4.40351e-05	3.72176
tetur02g90714	hypothetical protein	1.10982	9.14642	6.21504	1.21761e-05	0.000100882	2.67873
tetur05g00320	delta	1.10453	12.4747	2.77398	0.013515	0.0340537	-4.40257
tetur36g00260	HR96-like nuclear receptor h	1.10096	7.9159	12.2378	1.48253e-09	6.1161e-08	12.0304
tetur27g01180	Hypothetical protein	1.09751	7.91467	10.2497	1.88034e-08	5.10105e-07	9.39475
tetur05g02860	MIF4-like; type 1/2/3	1.09731	8.85046	6.74757	4.59723e-06	4.51435e-05	3.68577
tetur26g01570	histone 1	1.09354	13.4362	6.11604	1.46558e-05	0.000116978	2.48738
tetur07g05480	vitellogenin fused with superoxide dismutase	1.09127	9.84844	8.56553	2.20008e-07	3.76879e-06	6.83908
tetur07g03590	Mediator complex, subunit Med13, N-terminal, metazoa/fungi	1.0899	10.7825	8.18834	3.99169e-07	6.02498e-06	6.22027
tetur07g04510	cys-loop ligand-gated ion channel	1.08854	8.29092	11.1063	6.02462e-09	1.972e-07	10.5765
tetur30g01120	Plexin domain-containing protein	1.08707	7.46599	13.7423	2.68617e-10	1.54139e-08	13.7974
tetur05g03510	ribosome production factor 2 homolog	1.0864	9.75351	8.59679	2.09575e-07	3.64691e-06	6.88955
tetur21g00940	P-loop containing nucleoside triphosphate hydrolase	1.08615	8.08232	8.74796	1.65961e-07	3.04495e-06	7.13198
tetur22g00680	Hypothetical protein	1.08123	12.5328	5.14476	9.67563e-05	0.000553165	0.546188
tetur12g03580	PREDICTED: dual-specificity tyrosine-protein kinase	1.07728	8.88709	8.37178	2.9812e-07	4.80477e-06	6.52345
tetur11g06372	Alcohol dehydrogenase superfamily, zinc-type	1.07147	15.2111	6.16313	1.34167e-05	0.000109023	2.57856
tetur24g02170	SUMO-activating enzyme subunit 2	1.06424	8.53721	8.17407	4.0841e-07	6.13671e-06	6.1965
tetur01g02470	Glutathione S-transferase, C-terminal	1.06154	12.5411	7.44184	1.36834e-06	1.66348e-05	4.94154
tetur05g04970	nematoblast-specific protein	1.06099	11.9111	9.14801	9.06681e-08	1.86471e-06	7.76017
tetur23g00650	Hypothetical protein	1.06075	10.2967	13.6848	2.85885e-10	1.61392e-08	13.733
tetur571g00020	PREDICTED: similar to poly	1.06046	6.35259	10.4533	1.42557e-08	4.05676e-07	9.68233
tetur12g02390	SWI/SNF related; matrix associated; actin dependent regulator of chromatin; subfamily c; member 2	1.05639	9.97532	7.6864	9.06702e-07	1.18826e-05	5.36851
tetur04g06570	Lipopolysaccharide-induced tumor necrosis factor-alpha factor homolog	1.05428	7.67403	8.81058	1.5079e-07	2.83628e-06	7.23158
tetur07g06640	PREDICTED: similar to Serine/threonine-protein kinase DCAMKL1	1.05333	7.85478	9.21912	8.15878e-08	1.7082e-06	7.86983
tetur03g00830	Cytochrome P450 - CYP392A12	1.05281	9.46812	13.6863	2.85426e-10	1.61392e-08	13.7347
tetur21g01370	undecaprenyldiphospho-muramoylpentapeptide beta-N-acetylglucosaminyltransferase	1.05198	6.26372	8.27258	3.48911e-07	5.41139e-06	6.36003
tetur02g13670	PREDICTED: Rap guanine nucleotide exchange factor	1.05122	10.5164	6.28902	1.06104e-05	9.03242e-05	2.82089
tetur27g01360	regulator of G-protein signaling 7	1.049	8.3094	9.6581	4.30627e-08	1.01493e-06	8.53386
tetur04g09513	n/a	1.04812	6.16299	14.541	1.15581e-10	7.64552e-09	14.6672
tetur30g00590	Titin; Kettin	1.04731	9.6919	7.94021	5.96419e-07	8.3751e-06	5.8033
tetur30g00250	troponin i	1.04683	11.3587	7.68142	9.14252e-07	1.19478e-05	5.35991
tetur04g08620	intradiol ring-cleavage dioxygenase	1.04672	12.8447	6.98988	2.98948e-06	3.16355e-05	4.13142
tetur15g02170	Hypothetical protein	1.04607	6.99757	16.0371	2.63971e-11	2.28622e-09	16.1856
tetur08g01580	Pleckstrin-homology domain (PH domain)/Phosphotyrosine-binding domain (PTB)	1.04548	8.48973	8.2728	3.4879e-07	5.41139e-06	6.36039
tetur22g01550	baboon; TGFbeta receptor type I	1.04524	7.61347	10.7035	1.02001e-08	3.09195e-07	10.03
tetur29g00500	PREDICTED: similar to THO complex 2	1.04137	12.2011	6.71252	4.8957e-06	4.75719e-05	3.62067
tetur31g00490	PHD finger protein 20	1.03684	7.93318	8.79738	1.53862e-07	2.86916e-06	7.21063
tetur15g00870	voltage-gated ion channel; putative	1.03682	9.71475	8.33916	3.13907e-07	5.00815e-06	6.46985
tetur01g16090	phosphoglucomutase	1.03678	9.29113	9.9971	2.66659e-08	6.79762e-07	9.03183
tetur01g02460	DiacylGlycerol Kinase	1.03209	9.16559	7.378	1.52551e-06	1.81401e-05	4.82877
tetur03g03160	P-loop containing nucleoside triphosphate hydrolase	1.03073	11.2621	8.37631	2.95995e-07	4.78811e-06	6.53088
tetur08g06550	PREDICTED: similar to Bifunctional 3-phosphoadenosine 5-phosphosulfate synthethase 1	1.02178	11.2147	11.5289	3.52315e-09	1.24687e-07	11.1332
tetur02g08140	spectrin realated protein 1	1.02063	9.31572	9.24369	7.8677e-08	1.67492e-06	7.90758
tetur05g04420	choline/ethanolaminephosphotransferase 1	1.01997	10.7785	4.99476	0.000130869	0.000711715	0.23708
tetur06g04700	PREDICTED: similar to ubiquitin specific peptidase 9; X-linked; isoform 2	1.01985	8.65217	8.32949	3.18751e-07	5.06583e-06	6.45394
tetur11g01500	Carboxyl/cholinesterase	1.01637	12.6022	3.45373	0.00325318	0.0102839	-3.00798
tetur01g09960	cyclin-T	1.0156	11.9769	5.20996	8.49249e-05	0.000497142	0.679835
tetur01g00940	Orphan secreted protein	1.01467	12.5277	5.63449	3.67913e-05	0.000249765	1.5389
tetur04g01580	Hypothetical Cuticular Protein	1.01411	11.2779	2.62151	0.0184735	0.0443136	-4.70236
tetur33g00700	Apple-like	1.01293	8.24581	10.6816	1.05009e-08	3.14215e-07	9.99978
tetur05g03870	ubiquitin carboxyl-terminal hydrolase 48	1.01093	9.12753	7.45278	1.34315e-06	1.63857e-05	4.96081
tetur18g03610	Nucleotide-binding; alpha-beta plait	1.00887	8.49643	9.39793	6.2729e-08	1.40626e-06	8.14297
tetur06g00950	cysteine and glycine-rich protein 3	1.00588	12.3476	5.74691	2.95949e-05	0.000209159	1.76292
tetur08g03590	BTB/POZ-like	1.00241	8.52627	7.37933	1.52204e-06	1.81241e-05	4.83113
tetur21g02890	Serine/threonine-protein kinase, active site	1.00177	10.8739	6.02634	1.73555e-05	0.000134373	2.31294
tetur07g04560	sialin; putative	0.998257	8.7654	9.85863	3.23848e-08	7.97833e-07	8.82996
tetur10g02500	SWI/SNF related; matrix associated; actin dependent regulator of chromatin; subfamily c; member 2	0.995973	9.17469	8.36776	3.00017e-07	4.81407e-06	6.51686
tetur05g06720	Filamin A; Cheerio orthologue	0.992978	11.1458	8.31966	3.2376e-07	5.11849e-06	6.43774
tetur18g01450	stearoyl-CoA desaturase	0.992531	10.9642	8.21103	3.84926e-07	5.82781e-06	6.25801
tetur02g14140	antigen B membrane protein	0.989391	12.9367	10.2503	1.87882e-08	5.10105e-07	9.39559
tetur04g03910	Small secreted protein; Family G	0.988595	7.48933	5.19469	8.75542e-05	0.000510067	0.648584
tetur10g03520	GRAM	0.98837	10.0205	13.0192	5.98045e-10	2.81728e-08	12.9702
tetur02g04140	Tubulin/FtsZ; N-terminal	0.987515	8.93002	11.9768	2.02924e-09	7.99315e-08	11.7052
tetur17g00350	Carboxyl/cholinesterase	0.985678	9.46534	5.81693	2.58651e-05	0.000187163	1.90165
tetur14g02230	Growth factor; receptor	0.98265	8.79239	10.0811	2.37227e-08	6.16923e-07	9.15333
tetur08g04820	Protein of unknown function DUF229	0.982091	7.0012	9.78538	3.59195e-08	8.7258e-07	8.72232
tetur11g04820	phytoene dehydrogenase	0.979415	8.89259	3.53562	0.00273578	0.00887938	-2.83589
tetur19g00820	Homeodomain-like	0.977821	8.76144	9.9269	2.9419e-08	7.33843e-07	8.92975
tetur21g01570	Hypothetical protein	0.97553	11.0149	11.8282	2.4323e-09	9.21169e-08	11.5174
tetur26g01370	Ankyrin repeat-containing domain	0.974875	8.24362	10.6931	1.03419e-08	3.12138e-07	10.0156
tetur08g06330	sialin	0.974214	10.7669	2.95012	0.00938039	0.025024	-4.04901
tetur13g92971	hypothetical protein	0.971647	8.88555	6.39909	8.65771e-06	7.66496e-05	3.03104
tetur02g03150	calnexin	0.969344	6.69747	13.4061	3.87937e-10	2.00348e-08	13.4177
tetur19g00300	AT-rich interactive domain-containing protein 5B	0.968983	8.27119	5.56259	4.23222e-05	0.000279158	1.39486
tetur18g01800	still life; putative	0.967089	7.68786	11.461	3.83629e-09	1.34405e-07	11.0448
tetur07g00320	Hypothetical protein	0.96524	14.6825	3.80847	0.00153611	0.00546137	-2.2595
tetur30g00660	Aldo-keto reductase family A	0.964797	10.39	4.27423	0.00057672	0.00242441	-1.27251
tetur19g03110	lethal	0.964529	8.6645	7.28865	1.77787e-06	2.05768e-05	4.67002
tetur03g91568	hypothetical protein	0.964472	9.23386	10.0972	2.32012e-08	6.04707e-07	9.17642
tetur08g06400	vesicular glutamate transporter 1	0.961364	7.76756	9.07844	1.00586e-07	2.03271e-06	7.6523
tetur38g00280	Oxysterol-binding protein	0.960582	8.662	9.23584	7.95951e-08	1.68799e-06	7.89552
tetur12g03730	phosphoglyceromutase	0.959154	9.54465	7.37977	1.5209e-06	1.81241e-05	4.8319
tetur27g00090	cuticular protein analogous to peritrophins 1-A	0.959046	9.36698	3.9974	0.00103106	0.00394065	-1.85903
tetur02g08710	telomerase-binding protein EST1A	0.95717	10.1541	7.28854	1.77819e-06	2.05768e-05	4.66983
tetur29g01640	glycogenin	0.955888	13.0714	7.32272	1.67686e-06	1.96323e-05	4.73068
tetur25g01760	retinoblastoma binding protein 6; isoform CRA_b	0.953782	9.61488	5.18693	8.89241e-05	0.000516649	0.632673
tetur36g00370	transmembrane protein 145	0.95326	8.51838	10.2838	1.79458e-08	4.97487e-07	9.44324
tetur12g01340	Hypothetical protein	0.952792	8.29382	13.2855	4.435e-10	2.23255e-08	13.2793
tetur02g05600	Plasma Membrane Calcium ATPase	0.951607	10.886	8.10986	4.52846e-07	6.67492e-06	6.08925
tetur03g05950	Thyropin	0.950215	8.89483	8.22188	3.7831e-07	5.7652e-06	6.27601
tetur06g00230	Hypothetical protein	0.949908	14.8525	4.42082	0.000424876	0.00190192	-0.962827
tetur13g04460	3-oxoacyl-acyl-carrier-protein reductase	0.949748	7.72126	4.4912	0.00036713	0.00168342	-0.814509
tetur04g09492	Leucine-rich repeat domain, L domain-like	0.948809	8.9999	4.35334	0.000488944	0.00212129	-1.10527
tetur12g03830	phosphoglyceromutase	0.947016	10.8813	6.25801	1.12396e-05	9.48695e-05	2.76139
tetur16g02380	Carboxyl/cholinesterase	0.946858	13.6131	3.12831	0.00646124	0.0182749	-3.68495
tetur26g00550	UNCoordinated family member	0.946499	11.1171	7.14512	2.27863e-06	2.53982e-05	4.41277
tetur01g13690	Immunoglobulin E-set	0.946477	9.54552	6.39713	8.68895e-06	7.67799e-05	3.02732
tetur44g00200	RING-type zinc-finger, LisH dimerisation motif	0.946337	10.5487	8.17948	4.04879e-07	6.0968e-06	6.20552
tetur16g02720	Piezo family	0.943495	7.26705	9.11495	9.52468e-08	1.94454e-06	7.70897
tetur01g06680	hypothetical protein BRAFLDRAFT_118224	0.942891	7.06897	5.69675	3.26068e-05	0.000226091	1.66315
tetur12g01010	PREDICTED: similar to Y4C6B.2a	0.942766	8.90511	7.33491	1.64217e-06	1.93182e-05	4.75235
tetur03g01630	Homeobox, conserved site	0.942517	7.57136	8.59659	2.0964e-07	3.64691e-06	6.88923
tetur04g03830	sodium-dependent glucose transporter 1	0.942327	11.2253	10.1573	2.135e-08	5.64904e-07	9.26281
tetur03g09540	BTB/POZ-like	0.941191	8.15261	8.48945	2.47753e-07	4.13733e-06	6.71569
tetur05g01010	CCDC88A protein	0.940561	7.85494	10.6708	1.06524e-08	3.15365e-07	9.98491
tetur36g01110	Glycine-rich secreted protein	0.939519	11.6031	7.95777	5.79559e-07	8.17126e-06	5.83307
tetur10g01200	Cystathionine beta-synthase; core	0.939173	12.2609	5.29645	7.14862e-05	0.000431195	0.856479
tetur06g05320	Hypothetical protein	0.933927	11.0425	3.79824	0.00156969	0.00556232	-2.28117
tetur11g00930	Limkain b	0.933246	7.91529	7.27685	1.81432e-06	2.09082e-05	4.64898
tetur01g14180	Carboxyl/cholinesterase	0.932414	11.1983	3.79467	0.00158156	0.00559729	-2.28873
tetur16g01340	Protein kinase-like domain	0.931664	7.54104	9.99945	2.65785e-08	6.78775e-07	9.03524
tetur10g02650	Myosin regulatory light chain 2; smooth muscle isoform	0.930619	13.3621	4.7576	0.000212046	0.00106704	-0.255786
tetur29g01500	Homeobox protein cut	0.929656	8.63521	7.75007	8.15622e-07	1.09803e-05	5.47838
tetur06g01570	Glycoside hydrolase; subgroup; catalytic core	0.928118	8.16446	5.88114	2.28726e-05	0.000170008	2.02834
tetur13g04280	potassium/chloride symporter;	0.927134	8.05748	9.06689	1.0234e-07	2.05458e-06	7.63434
tetur05g09110	Hypothetical protein	0.926953	14.9445	5.58678	4.03716e-05	0.000268836	1.44338
tetur20g02580	Dfd; Ortholog of Drosophila melanogaster Deformed.	0.926585	10.7357	6.81076	4.10599e-06	4.13087e-05	3.80276
tetur01g04250	collagen alpha-1	0.92628	7.60276	8.66449	1.88717e-07	3.3522e-06	6.99847
tetur18g92102	hypothetical protein	0.924245	15.1608	3.18937	0.00568295	0.0164064	-3.55896
tetur02g02780	aldose 1-epimerase	0.922932	8.93237	7.53962	1.15964e-06	1.46218e-05	5.1132
tetur15g02030	conserved hypothetical protein	0.922877	7.5358	6.24233	1.15724e-05	9.71499e-05	2.73125
tetur18g01260	cathepsin A	0.922139	14.3491	4.08201	0.000862899	0.00340798	-1.67964
tetur34g00910	TEA/ATTS domain	0.921971	9.36331	6.54886	6.58211e-06	6.14331e-05	3.31443
tetur03g09530	Hypothetical protein	0.919226	7.17201	11.8098	2.4877e-09	9.36402e-08	11.494
tetur30g02070	adenylate cyclase	0.918499	6.2383	17.1402	9.59119e-12	1.04484e-09	17.2222
tetur04g06200	secreted salivary gland peptide; putative	0.918273	7.95112	8.09473	4.6404e-07	6.80396e-06	6.06389
tetur08g03410	solute carrier family 25 member 38	0.918154	8.5374	11.6853	2.90025e-09	1.06705e-07	11.3349
tetur13g01470	Ulp1 protease family, C-terminal catalytic domain	0.915875	7.73344	10.8039	8.93257e-09	2.74046e-07	10.1677
tetur07g06780	Hypothetical protein	0.915494	8.13248	6.09667	1.51992e-05	0.000120762	2.44981
tetur14g00190	innexin; putative	0.915273	11.2908	5.55509	4.29472e-05	0.00028288	1.37979
tetur01g02690	dissatisfaction homolog [Tetranychus urticae]	0.914587	7.71223	12.6371	9.26855e-10	4.11648e-08	12.5169
tetur07g05350	Bromodomain protein 4, C-terminal	0.911923	12.5708	6.15404	1.3647e-05	0.000110499	2.561
tetur10g02620	Myosin regulatory light chain 2; smooth muscle isoform	0.911696	11.8327	4.73433	0.000222398	0.00110913	-0.304386
tetur07g05430	Serine protease	0.909127	7.24267	7.85296	6.8814e-07	9.47228e-06	5.65479
tetur04g00840	Calcium/calmodulin-dependent/calcium-dependent protein kinase	0.908944	11.8523	5.66146	3.49139e-05	0.000239318	1.59279
tetur01g12800	NADH cytochrome b5 reductase gene a	0.90857	10.7857	8.80548	1.51969e-07	2.84818e-06	7.2235
tetur30g01610	Phosphatidic acid phosphatase type 2/haloperoxidase	0.907425	12.0208	7.03921	2.74137e-06	2.94724e-05	4.22118
tetur21g00630	myosin XV; putative	0.906856	8.64246	8.61489	2.03771e-07	3.56958e-06	6.91873
tetur08g07230	troponin i	0.906414	12.271	4.55874	0.00031923	0.00150944	-0.672408
tetur02g10330	Hypothetical protein	0.905658	8.10151	2.58937	0.0197217	0.046729	-4.76472
tetur24g01580	GK19605	0.904269	10.2523	9.40607	6.19878e-08	1.39638e-06	8.15533
tetur518g00010	calpain-6	0.903144	8.21605	9.78314	3.60338e-08	8.73834e-07	8.71902
tetur32g00200	myosin alkali light chain	0.903044	13.635	4.14125	0.000761944	0.00305597	-1.55408
tetur11g04070	beta-Ig-H3/fasciclin	0.90302	9.53739	10.3488	1.64245e-08	4.62674e-07	9.53524
tetur11g01150	PREDICTED: similar to limkain b1	0.901091	7.17237	6.33339	9.77322e-06	8.42261e-05	2.9058
tetur14g02560	Hypothetical protein	0.898948	8.35911	8.11817	4.46822e-07	6.60009e-06	6.10315
tetur26g01790	nucleoside diphosphate-linked moiety X motif 19; mitochondrial precursor	0.897829	8.63016	6.23632	1.17026e-05	9.78893e-05	2.71969
tetur14g01510	Leucine-rich repeat domain, L domain-like	0.897119	9.23128	10.5465	1.25746e-08	3.66054e-07	9.81264
tetur03g04330	PREDICTED: similar to F55A4.8a	0.896881	10.0821	4.55626	0.000320876	0.00151513	-0.677637
tetur21g02110	serrate RNA effector molecule homolog	0.896864	10.7472	5.56507	4.2118e-05	0.000278075	1.39983
tetur04g05340	PREDICTED: similar to arginine-glutamic acid dipeptide	0.89628	8.34577	7.11376	2.40647e-06	2.66105e-05	4.35619
tetur03g09510	hypothetical protein	0.895414	11.2062	2.8618	0.0112706	0.0291573	-4.22715
tetur05g05350	1-phosphatidylinositol-4;5-bisphosphate phosphodiesterase beta-4	0.894555	7.42154	7.86209	6.77879e-07	9.37732e-06	5.67039
tetur23g00450	Serine proteases, trypsin family, histidine active site	0.893668	8.12674	7.68937	9.02214e-07	1.18684e-05	5.37366
tetur02g06070	Small GTPase; Rho type	0.892938	13.2738	9.07921	1.00471e-07	2.03271e-06	7.65349
tetur01g01010	Orphan Secreted protein	0.89057	15.7394	4.54911	0.000325653	0.00153357	-0.692665
tetur23g02400	PREDICTED: similar to bruno-like 4 protein	0.888136	6.87342	9.55941	4.96238e-08	1.15905e-06	8.3865
tetur04g07830	Hypothetical protein	0.887442	8.53639	8.9915	1.14608e-07	2.26368e-06	7.51668
tetur06g01390	Hypothetical protein	0.887406	9.09226	8.56744	2.19356e-07	3.76688e-06	6.84216
tetur16g02370	Hypothetical protein	0.887106	7.16522	2.77352	0.0135277	0.0340673	-4.40347
tetur05g07380	Aspartyl/glutamyl-tRNA(Asn/Gln) amidotransferase, C subunit	0.887058	11.3588	5.6753	3.39893e-05	0.000234048	1.62041
tetur21g01490	probable rRNA-processing protein EBP2	0.887017	9.1941	8.26551	3.52867e-07	5.44892e-06	6.34832
tetur07g07220	Protein winged eye	0.886926	8.94519	12.5217	1.06035e-09	4.63497e-08	12.3776
tetur12g02260	Hypothetical protein	0.886792	9.28017	4.02545	0.000971927	0.00375417	-1.79956
tetur29g00810	up	0.885665	12.5608	3.73743	0.00178501	0.00619723	-2.40988
tetur16g00850	Carboxypeptidase-like, regulatory domain	0.885094	9.26062	8.29146	3.38589e-07	5.29175e-06	6.39123
tetur11g04460	dihydroxyacetone kinase; DhaK subunit	0.885088	11.4821	11.4331	3.97356e-09	1.37487e-07	11.0084
tetur26g01500	Glutathione S-transferase; class delta	0.882801	9.79256	10.1875	2.04804e-08	5.47086e-07	9.306
tetur13g03530	HECT domain	0.882334	13.8781	9.32353	6.99481e-08	1.53358e-06	8.02978
tetur27g02578	Agatoxin related protein	0.881313	8.8208	4.58971	0.00029945	0.00142802	-0.607348
tetur01g14780	Cystine-knot cytokine	0.880837	7.88735	5.61151	3.84723e-05	0.000258659	1.49294
tetur12g03240	DNA-directed RNA polymerase II largest subunit	0.878646	10.6379	5.16885	9.21991e-05	0.000532129	0.595613
tetur35g01090	Sodium/calcium exchanger membrane region	0.878332	10.0373	9.9348	2.90946e-08	7.28358e-07	8.94127
tetur12g02550	MTA1-like	0.876857	9.0399	6.78774	4.27828e-06	4.28258e-05	3.7602
tetur16g03270	GF12948	0.875987	6.37507	10.9901	7.00184e-09	2.23418e-07	10.4205
tetur01g11240	amino acid transporter	0.871879	9.86352	4.69785	0.000239682	0.0011818	-0.380666
tetur05g02840	PREDICTED: similar to eukaryotic translation initiation factor 4 gamma; 2	0.871283	10.6682	6.50125	7.17896e-06	6.58132e-05	3.22467
tetur19g00850	Acetyl-cholinesterase	0.870807	8.94799	7.8121	7.36064e-07	1.00036e-05	5.58491
tetur11g03880	Zinc finger, C2H2-like	0.868299	7.73526	9.12729	9.35106e-08	1.91752e-06	7.72809
tetur02g07490	Orfan gene family B; member-10	0.868183	6.66528	10.2848	1.7921e-08	4.97487e-07	9.44467
tetur13g00650	Secreted peptide of unknown function	0.864888	9.63829	7.53225	1.17414e-06	1.4763e-05	5.10031
tetur09g00680	P-loop containing nucleoside triphosphate hydrolase	0.861986	9.57889	6.41386	8.42564e-06	7.47849e-05	3.05913
tetur02g05340	lipase 1 precursor	0.861165	7.90925	7.33458	1.6431e-06	1.93182e-05	4.75176
tetur01g13290	Small Secreted Protein; family A	0.859626	11.8638	3.83968	0.00143808	0.00518157	-2.19339
tetur10g05770	UDP-glucuronosyl/UDP-glucosyltransferase	0.859087	7.27341	6.68299	5.16292e-06	4.9925e-05	3.56567
tetur19g00230	Single-Pass Intrinsic Membrane Protein	0.858569	10.872	5.32844	6.709e-05	0.000409231	0.921601
tetur04g03580	Hypothetical protein	0.857715	10.0633	4.69344	0.000241865	0.00119172	-0.389904
tetur06g05950	Immunoglobulin-like fold	0.857506	8.0268	8.708	1.76472e-07	3.19575e-06	7.06817
tetur01g01000	Orphan secreted protein	0.856834	14.4487	4.50096	0.000359776	0.00165599	-0.793951
tetur02g07110	PREDICTED: hypothetical protein	0.85266	7.53698	5.56374	4.22278e-05	0.000278667	1.39716
tetur01g13680	Endoglin/CD105 antigen	0.852229	10.5251	6.64705	5.50872e-06	5.26842e-05	3.49859
tetur21g02620	Hypothetical protein	0.850981	13.2186	5.17692	9.07214e-05	0.000525558	0.612168
tetur03g02420	amidase	0.850547	10.5276	7.30503	1.72851e-06	2.01525e-05	4.69921
tetur12g00720	transmembrane protein 20	0.850184	9.01561	7.33714	1.63593e-06	1.92826e-05	4.7563
tetur26g01220	phosphatidylethanolamine-binding protein	0.847432	7.22394	8.44237	2.66738e-07	4.40687e-06	6.63899
tetur23g01920	Voltage-dependent calcium channel subunit alpha-2/delta-3; putative	0.846916	10.0139	8.96494	1.19289e-07	2.32964e-06	7.47509
tetur12g02640	Mediator complex, subunit Med23	0.846784	6.534	3.24107	0.00509692	0.015042	-3.45188
tetur07g03510	afadin; putative	0.845238	9.5643	6.32077	1.00041e-05	8.58448e-05	2.88167
tetur06g01830	Nose resistant-to-fluoxetine protein, N-terminal	0.845033	8.20625	7.83305	7.11066e-07	9.72239e-06	5.62077
tetur32g01270	Hypothetical protein	0.842171	8.79074	8.06796	4.84553e-07	7.06019e-06	6.01897
tetur30g02260	Glycoside hydrolase; subgroup; catalytic core	0.840998	11.4181	6.42286	8.28746e-06	7.39823e-05	3.07622
tetur22g00080	Seven cysteines	0.838535	7.75494	9.06292	1.02951e-07	2.05458e-06	7.62815
tetur01g07690	Heat shock protein Hsp70	0.838228	12.7526	8.07001	4.8295e-07	7.05158e-06	6.02241
tetur23g00440	Hypothetical protein	0.838074	9.09214	9.22939	8.03578e-08	1.69774e-06	7.88561
tetur04g03060	suppression of tumorigenicity 7; isoform a	0.83729	11.5998	7.65911	9.48943e-07	1.23433e-05	5.32126
tetur08g06160	Cytochrome P450 - CYP387A1-p1 pseudogene	0.837185	10.9689	5.1039	0.000105026	0.000592228	0.462201
tetur04g02370	fatty acid synthase	0.836583	8.00248	5.21475	8.4116e-05	0.000493443	0.689645
tetur418g00010	Pleckstrin homology domain	0.836506	9.23896	7.87504	6.6361e-07	9.2257e-06	5.69247
tetur39g00010	solute carrier family 1	0.835967	9.15943	5.99786	1.8317e-05	0.000140414	2.25732
tetur311g00020	Hypothetical protein	0.835253	6.58879	10.1665	2.10821e-08	5.58877e-07	9.27592
tetur34g01100	RmlC-like jelly roll fold	0.834933	7.49479	9.73251	3.87222e-08	9.27735e-07	8.64426
tetur08g07730	Hypothetical protein	0.833593	6.95033	4.06814	0.000888443	0.00349167	-1.70905
tetur01g04720	3'5'-cyclic nucleotide phosphodiesterase	0.831684	7.81449	5.90039	2.20469e-05	0.000165015	2.06623
tetur21g02380	Domain of unknown function DB	0.831592	9.34167	6.74219	4.64173e-06	4.54844e-05	3.6758
tetur34g00500	coronin	0.831552	9.14092	6.08052	1.56684e-05	0.000123647	2.41844
tetur02g02330	lethal	0.830057	11.5187	4.00458	0.00101559	0.00389157	-1.84382
tetur01g01520	Apolipoprotein D precursor; putative	0.828972	11.0126	2.6853	0.0162167	0.0397269	-4.57772
tetur01g11220	amino acid transporter	0.827633	7.46604	5.189	8.85568e-05	0.00051473	0.636914
tetur06g03220	fasciclin ii	0.827384	8.54751	6.5299	6.81341e-06	6.32531e-05	3.27871
tetur13g00860	conserved hypothetical protein	0.827127	7.19428	13.3841	3.97498e-10	2.0303e-08	13.3925
tetur23g00930	Hypothetical protein	0.827058	7.6192	9.97015	2.76894e-08	7.02002e-07	8.9927
tetur17g03550	MD-2-related lipid-recognition	0.82675	16.4704	3.0591	0.00747045	0.0207506	-3.82703
tetur10g04690	Hormone Receptor 38 (1)	0.826649	9.655	5.59463	3.9758e-05	0.000265866	1.45913
tetur07g04120	PREDICTED: similar to rab3 GTPase-activating protein; non-catalytic subunit	0.825918	8.10645	8.05241	4.96907e-07	7.19509e-06	5.99283
tetur31g01340	Zinc finger; LIM-type	0.825695	9.67466	4.91994	0.000152291	0.000810514	0.0821089
tetur02g92485	hypothetical protein	0.823343	7.737	8.09588	4.6318e-07	6.79851e-06	6.06582
tetur01g12960	Protein of unknown function DUF4538	0.821031	10.2386	7.30241	1.73631e-06	2.02183e-05	4.69455
tetur03g02740	PREDICTED: similar to adenylate cyclase	0.820959	11.7703	4.06495	0.000894408	0.00351412	-1.7158
tetur03g03070	Hypothetical protein	0.819892	9.19911	5.1282	0.000100025	0.000567433	0.512156
tetur06g04000	Serine/threonine-protein kinase, active site	0.818254	9.115	6.68018	5.18915e-06	5.01438e-05	3.56043
tetur04g09509	Superoxide dismutase (Cu/Zn) / superoxide dismutase copper chaperone	0.817795	6.62257	15.6503	3.82049e-11	3.1337e-09	15.8061
tetur25g01890	Hypothetical protein	0.815812	8.43853	5.30064	7.08941e-05	0.000428685	0.865013
tetur27g01730	conserved hypothetical protein	0.81566	8.83983	4.89131	0.000161413	0.000847735	0.022681
tetur16g03760	Hypothetical protein	0.815585	6.61788	4.39083	0.00045222	0.00199486	-1.0261
tetur04g08320	NK2 homeobox 2	0.813683	10.1861	8.2744	3.47904e-07	5.40823e-06	6.36304
tetur11g06270	Nuclear protein MDM1	0.813677	7.24145	7.69646	8.91633e-07	1.17513e-05	5.3859
tetur10g00150	nucleolin protein Nsr1; putative	0.812776	8.80918	6.03119	1.71971e-05	0.000133442	2.3224
tetur02g11230	Hypothetical protein	0.812016	10.8331	6.37855	8.99137e-06	7.89022e-05	2.99196
tetur06g03890	Prefoldin	0.81145	6.8593	7.63243	9.92228e-07	1.28108e-05	5.27497
tetur30g01300	S-adenosyl-L-methionine-dependent methyltransferase	0.811162	10.4932	3.00335	0.00839433	0.0228347	-3.94086
tetur22g00130	bicaudal C homolog 1	0.810297	13.1509	4.74912	0.000215761	0.00108187	-0.273498
tetur08g01630	Hypothetical protein	0.810115	9.1933	5.4864	4.91292e-05	0.000316717	1.24156
tetur01g15310	ABC-transporter; class C;	0.809739	9.20891	9.47943	5.57112e-08	1.27389e-06	8.26626
tetur14g00830	arginine/serine-rich coiled-coil protein 2	0.80724	10.6395	11.3157	4.60934e-09	1.56002e-07	10.8544
tetur38g00240	collagen alpha-2	0.806184	10.9367	5.2277	8.19698e-05	0.000483497	0.71614
tetur33g01070	OMB-like T-box family transcriptional regulator	0.805358	7.651	8.63906	1.96285e-07	3.45822e-06	6.95762
tetur02g13200	SH2 domain	0.804933	8.33094	6.545	6.62858e-06	6.1801e-05	3.30715
tetur01g09080	CUB	0.804601	8.66191	7.38788	1.5e-06	1.79537e-05	4.84625
tetur06g00760	MIF4-like; type 1/2/3	0.804434	11.8706	3.93341	0.00117993	0.00440863	-1.99471
tetur41g00180	tropomyosin	0.801775	12.3535	5.5969	3.95831e-05	0.00026485	1.46367
tetur09g05620	Hypothetical protein	0.800628	7.54806	8.5163	2.37564e-07	4.00555e-06	6.75932
tetur02g08790	Hypothetical protein	0.799379	8.71891	5.95179	1.9991e-05	0.000151745	2.16714
tetur07g06420	UDP-glycosyltransferase; teturUGT37	0.799205	7.73066	5.98313	1.8836e-05	0.000143839	2.22851
tetur09g02110	PREDICTED: similar to Neurensin-1	0.798483	7.95773	6.22301	1.19965e-05	9.97491e-05	2.69408
tetur29g01360	Low Complexity Secreted Protein	0.796679	17.0144	5.28594	7.29952e-05	0.000438726	0.835052
tetur02g05770	Serine/threonine-protein kinase, active site	0.796482	9.36538	8.50769	2.4078e-07	4.03769e-06	6.74535
tetur01g00470	PREDICTED: CASK interacting protein 1	0.796238	9.55526	4.37077	0.000471512	0.00205912	-1.06847
tetur37g01130	GCN1 general control of amino-acid synthesis 1-like 1	0.795591	9.77547	6.18138	1.29662e-05	0.000106228	2.61382
tetur02g01960	nucleolar GTP-binding protein 1	0.795099	7.83734	8.27458	3.47807e-07	5.40823e-06	6.36333
tetur05g08860	Hypothetical protein	0.793877	7.27059	7.62485	1.0049e-06	1.29146e-05	5.2618
tetur05g06890	Ankyrin Repeat-rich Membrane Spanning protein; KIDINS220/ARMS protein homologue	0.793776	7.94804	9.19088	8.50741e-08	1.7732e-06	7.82634
tetur36g00520	palmitoyl protein thioesterase family protein	0.793737	6.47147	7.30216	1.73706e-06	2.02183e-05	4.6941
tetur04g05440	Orange	0.792808	10.771	7.70057	8.85551e-07	1.16933e-05	5.39301
tetur19g02370	axotactin	0.792782	7.14041	9.65962	4.29688e-08	1.01493e-06	8.53613
tetur05g00070	UDP-glycosyltransferase; teturUGT21	0.792715	9.1885	4.35766	0.000484566	0.00210799	-1.09615
tetur126g00010	Zinc finger, C2H2-like	0.792227	10.6166	5.14351	9.69991e-05	0.000553996	0.54362
tetur29g00950	Carboxyl/cholinesterase; incomplete	0.79178	9.2291	7.05897	2.64812e-06	2.87357e-05	4.25704
tetur640g00020	trans-1;2-dihydrobenzene-1;2-diol dehydrogenase	0.7916	9.92699	4.60616	0.000289462	0.00138703	-0.572828
tetur12g02110	conserved unknown protein	0.791595	8.78514	5.2847	7.31752e-05	0.000439619	0.832525
tetur24g01410	Hypothetical protein	0.791428	6.75282	8.57763	2.15907e-07	3.72139e-06	6.85863
tetur24g00460	XPA binding protein 2	0.791324	9.12873	9.25042	7.7898e-08	1.66596e-06	7.91792
tetur02g03600	Hypothetical protein	0.791013	8.41706	9.0946	9.81854e-08	1.99577e-06	7.6774
tetur06g00290	titin	0.790746	10.033	5.1434	9.70208e-05	0.000553996	0.543391
tetur12g00880	cysteine and glycine-rich protein 3	0.790203	11.2227	4.65211	0.000263314	0.00128155	-0.476449
tetur20g01280	Secreted growth factor Wnt protein	0.789532	8.54789	8.23038	3.73203e-07	5.69983e-06	6.29013
tetur03g07930	Cathepsin B	0.789214	14.6528	4.73385	0.000222618	0.00110962	-0.305394
tetur22g00120	Zinc finger; FYVE/PHD-type	0.789122	8.52131	9.577	4.8382e-08	1.13385e-06	8.41283
tetur01g15490	Hypothetical protein	0.789087	6.8304	11.7518	2.67183e-09	9.88224e-08	11.42
tetur11g02240	calmodulin	0.788584	11.0656	4.70418	0.000236587	0.00116943	-0.367423
tetur23g01970	GNAS complex locus	0.788542	10.0668	7.21837	2.00686e-06	2.28999e-05	4.54441
tetur09g05530	Zinc finger; C2H2 type	0.788224	8.57312	8.42639	2.73526e-07	4.4924e-06	6.61288
tetur06g02030	SLIT-ROBO Rho GTPase activating protein 2	0.786932	8.1795	3.51377	0.00286518	0.00924602	-2.88185
tetur08g02830	Phosphoribosylformylglycinamidine synthase	0.78663	11.9487	3.94384	0.00115428	0.00433249	-1.97261
tetur14g03800	PREDICTED: similar to PMP1 protein	0.785692	8.72863	5.74494	2.97076e-05	0.000209531	1.75901
tetur12g03870	CDC14 cell division cycle 14 homolog B	0.785301	9.75739	7.56798	1.10556e-06	1.40272e-05	5.16276
tetur04g09459	Small Secreted Protein; Family F	0.784896	13.8784	3.78	0.00163136	0.00574727	-2.31978
tetur07g06240	mediator of RNA polymerase II transcription subunit 15	0.784558	7.60651	10.2501	1.87915e-08	5.10105e-07	9.3954
tetur04g08600	Zinc finger, C2H2-like	0.783374	9.80739	5.87789	2.30151e-05	0.000170704	2.02194
tetur17g00670	Dopey, N-terminal	0.780882	10.0804	6.46607	7.65603e-06	6.95024e-05	3.15814
tetur176g00020	PREDICTED: similar to inositol 1;4;5-trisphosphate 3-kinase B	0.779889	10.8268	6.63584	5.6214e-06	5.3505e-05	3.47764
tetur143g00020	Small Secretory Protein; Family F	0.779539	9.42699	4.1687	0.000719313	0.00292252	-1.49593
tetur04g01090	Hypothetical protein	0.779207	7.66918	8.27194	3.49272e-07	5.41139e-06	6.35896
tetur03g03580	Rho-kinase (rok)	0.777782	9.84064	6.95361	3.18675e-06	3.33855e-05	4.06522
tetur06g04790	Hypothetical protein	0.777526	8.39492	7.13244	2.32943e-06	2.58612e-05	4.38992
tetur06g04970	3-oxoacyl-acyl-carrier-protein reductase	0.777334	6.39587	6.17648	1.30855e-05	0.000106892	2.60437
tetur02g07430	tropomyosin	0.774998	12.1952	4.12946	0.000781039	0.00312595	-1.57907
tetur26g02090	Mediator complex, subunit Med1	0.774767	9.02528	8.40514	2.8283e-07	4.6343e-06	6.57813
tetur02g01920	Armadillo-type fold	0.774742	8.5078	9.11794	9.48232e-08	1.93873e-06	7.7136
tetur03g09070	Voltage-dependent calcium channel, alpha-1 subunit, IQ domain	0.772739	7.08426	9.10491	9.66847e-08	1.96813e-06	7.6934
tetur25g01000	gamma-glutamyl hydrolase precursor	0.771686	8.53019	5.14603	9.65107e-05	0.000552214	0.548791
tetur23g01520	RhoGAP	0.771013	9.91034	5.69152	3.29381e-05	0.000228161	1.65274
tetur06g05990	ATP-dependent RNA helicase DHH1	0.770359	14.3689	4.2639	0.000589306	0.00247136	-1.29436
tetur07g02580	Tetratricopeptide-like helical domain	0.769367	10.2598	5.12875	9.99144e-05	0.000567035	0.513291
tetur07g00050	PREDICTED: phosphodiesterase 11A	0.769258	7.48178	6.46871	7.61902e-06	6.92115e-05	3.16315
tetur09g01490	phosphatidylinositide phosphatase SAC1	0.768625	9.23592	6.21268	1.22299e-05	0.000101207	2.67418
tetur05g06570	Cytochrome P450 - CYP389C11	0.768399	9.81793	4.14421	0.00075722	0.00304201	-1.5478
tetur01g07880	ABC-transporter; class C;	0.768004	12.2982	7.58067	1.08221e-06	1.37812e-05	5.1849
tetur01g14520	Hypothetical protein	0.767335	9.07508	8.73621	1.6898e-07	3.08814e-06	7.11325
tetur03g02790	phospholipid scramblase 1	0.767305	6.36686	11.764	2.6318e-09	9.81226e-08	11.4357
tetur01g06320	PREDICTED: similar to GMP synthase	0.766292	14.3958	3.49211	0.00299955	0.00961732	-2.92739
tetur07g05720	adenosine kinase	0.765733	10.8465	4.30342	0.000542608	0.00231309	-1.21078
tetur20g02920	PREDICTED: dystonin isoform 1	0.76443	7.79387	7.09974	2.466e-06	2.71588e-05	4.33087
tetur15g02730	UNC44 Ankyrin homolog	0.763582	8.40874	6.75388	4.54551e-06	4.47617e-05	3.69749
tetur11g01040	Hypothetical protein	0.763132	8.66471	4.37543	0.000466959	0.00204564	-1.05863
tetur01g05510	PREDICTED: ubiquitin specific peptidase 31	0.762669	9.38022	5.17667	9.0768e-05	0.00052561	0.611641
tetur26g01510	Glutathione S-transferase; class delta	0.762438	9.91899	4.65776	0.000260274	0.00127075	-0.464625
tetur09g02000	ABC-transporter; class G	0.76186	10.831	5.43624	5.4221e-05	0.000343975	1.14024
tetur27g00170	Lys/Arg repeats-containing protein; putative splicing factor	0.761037	8.86665	6.93653	3.28434e-06	3.42791e-05	4.03398
tetur24g00950	Alpha/Beta hydrolase fold	0.760843	9.60931	7.68193	9.13473e-07	1.19478e-05	5.36079
tetur11g04120	zinc finger protein; putative	0.76073	7.97289	6.11161	1.47782e-05	0.000117753	2.4788
tetur03g09961	Cytochrome P450, conserved site	0.758088	8.48759	3.46559	0.00317261	0.0100703	-2.98309
tetur24g02050	Hypothetical protein	0.757156	8.32456	8.10416	4.5703e-07	6.72949e-06	6.0797
tetur188g00030	Lipoprotein; type 6	0.756282	6.53195	14.7018	9.80075e-11	6.7405e-09	14.8371
tetur08g06120	Hypothetical protein	0.755803	11.2994	9.06364	1.0284e-07	2.05458e-06	7.62927
tetur05g05410	PREDICTED: hypothetical protein	0.75482	9.02383	2.99546	0.00853378	0.0231252	-3.95692
tetur17g01520	smoothened	0.75463	7.94446	7.30999	1.71386e-06	2.00319e-05	4.70804
tetur16g02770	cryptochrome 1	0.754087	6.99998	8.55493	2.23672e-07	3.82216e-06	6.82192
tetur05g01090	core alpha 1;3-fucosyltransferase	0.754012	7.47524	6.75526	4.53432e-06	4.4683e-05	3.70004
tetur13g01300	YTH domain	0.753304	10.0753	8.08913	4.68252e-07	6.85132e-06	6.05451
tetur19g01130	similar to pre-mRNA splicing factor ATP-dependent RNA helicase PRP16	0.752451	11.4356	9.56449	4.9262e-08	1.15253e-06	8.3941
tetur04g05720	immunodeficiency virus type I enhancer binding protein	0.751492	10.8475	4.29632	0.000550708	0.00233975	-1.22579
tetur04g07530	Hypothetical protein	0.750214	9.11861	7.21955	2.0028e-06	2.28722e-05	4.54651
tetur23g00330	Ribonuclease kappa	0.749745	11.9732	7.11604	2.39692e-06	2.6547e-05	4.36032
tetur01g02350	Hypothetical protein	0.749597	7.31097	5.29471	7.17346e-05	0.000432267	0.852922
tetur11g05160	Chitin binding domain	0.747825	11.5564	6.17932	1.30164e-05	0.000106514	2.60984
tetur04g90892	hypothetical protein	0.747804	7.88071	8.6591	1.90295e-07	3.36735e-06	6.98982
tetur19g02260	Serine proteases, trypsin family, histidine active site	0.747622	11.0174	6.97395	3.07451e-06	3.23554e-05	4.10236
tetur01g13540	PHD finger protein 3	0.7472	10.3756	6.10587	1.49385e-05	0.000118826	2.46767
tetur14g01850	Peptidase M13; neprilysin; C-terminal	0.746987	8.6747	7.07254	2.58598e-06	2.8193e-05	4.28164
tetur26g00100	Zinc finger; C2H2 type	0.74675	8.1886	8.53309	2.31418e-07	3.92566e-06	6.78655
tetur01g00800	LUC7-like	0.745765	12.6536	9.18003	8.64549e-08	1.79394e-06	7.80961
tetur03g03800	Alpha/Beta hydrolase fold	0.744566	9.04668	4.50282	0.000358393	0.00165095	-0.790036
tetur12g03470	Hypothetical protein with a conserved domain	0.743615	10.438	7.21658	2.0131e-06	2.29472e-05	4.5412
tetur09g05390	26S proteasome non-ATPase regulatory subunit 1	0.743333	8.96024	10.6295	1.12545e-08	3.32485e-07	9.92781
tetur05g05750	Chitin binding protein; peritrophin-A	0.742874	9.4485	2.76751	0.0136964	0.0343988	-4.41541
tetur27g01300	neuronal calcium sensor 1	0.74264	8.77882	4.67216	0.000252676	0.00123886	-0.434451
tetur02g10100	NF-kappa-B inhibitor-like protein 2	0.742263	8.67929	5.37333	6.13854e-05	0.000381273	1.01281
tetur162g00010	EGF-like; laminin	0.741614	10.5523	5.32692	6.72921e-05	0.000410285	0.918514
tetur03g04280	Phosphatidylinositol-4-phosphate 5-kinase; core	0.74137	9.74952	4.84424	0.000177647	0.000920514	-0.0751805
tetur18g00930	Glycine-rich secreted protein	0.741083	10.0789	4.85887	0.000172428	0.00089714	-0.0447385
tetur09g03850	Casein kinase II subunit alpha	0.740521	10.3576	5.86578	2.3554e-05	0.000173318	1.99809
tetur01g10640	CG4797	0.738218	12.3688	8.95564	1.20976e-07	2.35928e-06	7.46049
tetur04g01060	Fatty acyl-CoA reductase	0.737874	7.85936	3.28829	0.00461398	0.0138152	-3.35376
tetur03g02940	PREDICTED: similar to Kinesin-like protein KIF3B	0.73773	9.78234	6.92722	3.3388e-06	3.46916e-05	4.01694
tetur12g01810	Cathepsin L	0.736849	9.96552	5.83261	2.5099e-05	0.000182757	1.93263
tetur18g01580	leucine rich repeat	0.736255	10.8406	7.47582	1.29168e-06	1.58931e-05	5.00134
tetur23g00800	Receptor-transporting protein	0.735088	10.6079	8.88216	1.35215e-07	2.59703e-06	7.34487
tetur07g00650	relish	0.734601	10.5843	5.89479	2.2284e-05	0.000166432	2.05521
tetur05g04060	secreted salivary gland peptide; putative	0.733114	8.67076	6.34053	9.64511e-06	8.34314e-05	2.91943
tetur23g01070	phosphatidylcholine-sterol acyltransferase	0.732519	9.445	6.53618	6.73586e-06	6.26165e-05	3.29055
tetur10g04710	Hormone Receptor 38 (2)	0.731759	10.1439	4.58452	0.000302677	0.00144095	-0.618253
tetur18g00890	Nucleotide-binding; alpha-beta plait	0.730983	13.0418	6.30874	1.02296e-05	8.76714e-05	2.85865
tetur36g00340	UDP-glycosyltransferase; teturUGT76	0.730569	9.03833	7.08825	2.51598e-06	2.76025e-05	4.31008
tetur11g03710	Histidine kinase-like ATPase, C-terminal domain	0.72836	10.9345	7.28449	1.79064e-06	2.07037e-05	4.6626
tetur10g00190	Microtubule-associated serine/threonine-protein kinase, domain	0.7283	10.2404	6.74805	4.59322e-06	4.51359e-05	3.68668
tetur07g06530	structural maintenance of chromosomes protein 6	0.727246	11.1447	4.20699	0.00066384	0.00272975	-1.41483
tetur02g00990	Hypothetical protein	0.727238	7.98665	6.05701	1.63787e-05	0.000128018	2.3727
tetur22g00250	Protease inhibitor I8; cysteine-rich trypsin inhibitor-like	0.725927	10.7114	4.11094	0.000812008	0.00323043	-1.61832
tetur07g01120	CRAL-TRIO lipid binding domain	0.725471	8.49559	4.60431	0.000290564	0.00139136	-0.576698
tetur06g01550	cuticular protein analogous to peritrophins 1-A	0.724813	8.74307	3.76754	0.00167492	0.00588437	-2.34617
tetur10g04860	integrator complex subunit 4	0.7245	10.8476	8.13971	4.31591e-07	6.42273e-06	6.13917
tetur09g05940	SUZ domain	0.723912	10.1691	5.53613	4.45688e-05	0.000291743	1.34168
tetur10g02830	Zinc finger, RING-type, conserved site	0.72339	12.7433	5.61968	3.78662e-05	0.000255322	1.50928
tetur01g12650	DNA-binding protein elf-1	0.722745	8.10443	8.3506	3.0827e-07	4.93515e-06	6.48867
tetur26g02390	PREDICTED: iron/zinc purple acid phosphatase-like protein-like	0.722304	9.7156	3.25253	0.00497532	0.01473	-3.42809
tetur04g06840	PREDICTED: talin 2	0.722233	8.29234	6.71889	4.84003e-06	4.71894e-05	3.63251
tetur06g04180	vacuolar protein sorting 39	0.722002	8.15461	6.44836	7.90849e-06	7.12377e-05	3.1246
tetur21g01900	alkyldihydroxyacetonephosphate synthase	0.721434	10.4158	8.88343	1.34956e-07	2.59563e-06	7.34686
tetur21g03100	Cutoff-like protein	0.720811	7.78822	9.93491	2.90902e-08	7.28358e-07	8.94142
tetur03g02610	PREDICTED: ash1	0.719851	10.9899	9.24447	7.85857e-08	1.67492e-06	7.90878
tetur08g05890	scratch homolog 1; zinc finger protein	0.719559	7.21696	6.07197	1.5923e-05	0.000125112	2.40181
tetur17g00510	lipase 1 precursor	0.719407	8.32208	2.84052	0.0117787	0.0302361	-4.26982
tetur03g03600	putative gut cathepsin L-like cysteine protease	0.718974	10.5443	6.50917	7.07591e-06	6.51264e-05	3.23962
tetur07g04180	otopetrin	0.718486	10.6326	7.10396	2.44791e-06	2.70259e-05	4.3385
tetur08g01710	unnamed protein product	0.717567	7.44427	9.44858	5.8265e-08	1.3232e-06	8.21969
tetur06g05250	adenylate cyclase	0.716995	8.50873	5.5821	4.07414e-05	0.000270781	1.434
tetur10g03690	pangolin	0.716716	7.19026	8.38674	2.91161e-07	4.74519e-06	6.54798
tetur09g05470	musashi homolog 2	0.716057	7.80636	5.33676	6.59929e-05	0.000404742	0.93852
tetur13g01740	Heterogeneous nuclear ribonucleoprotein U-like protein 1	0.714673	12.7024	3.27546	0.00474047	0.0141544	-3.38043
tetur02g00230	hypothetical protein BRAFLDRAFT_84085	0.714478	8.27504	8.37904	2.9472e-07	4.78311e-06	6.53536
tetur35g00520	apoptosis regulator BAX	0.714098	7.24602	9.15885	8.92181e-08	1.84032e-06	7.77692
tetur01g10270	FERM, C-terminal PH-like domain	0.713279	11.0338	6.16947	1.32584e-05	0.000108003	2.59081
tetur01g16361	Glutathione S-transferase; incomplete	0.71319	8.26039	9.33426	6.88554e-08	1.51918e-06	8.04614
tetur20g00150	GH10367	0.713035	7.65222	9.46933	5.65347e-08	1.286e-06	8.25101
tetur05g07440	Endophilin-A	0.712335	9.72008	6.99005	2.98858e-06	3.16355e-05	4.13173
tetur18g03390	NADPH cytochome P450 reductase	0.711359	11.6112	7.65404	9.57012e-07	1.24136e-05	5.31247
tetur08g05320	Disintegrin and metalloproteinase domain-containing protein 10	0.709935	11.8498	5.05589	0.000115677	0.000641099	0.363316
tetur16g01600	PREDICTED: similar to CG18076-PB	0.709025	7.77873	6.58901	6.11902e-06	5.76511e-05	3.38989
tetur02g02980	Hypothetical protein	0.708506	6.2818	16.5889	1.57873e-11	1.56126e-09	16.7124
tetur27g00770	protein tyrosine phosphatase; receptor type; D	0.708428	7.9136	5.40182	5.8027e-05	0.000364308	1.07057
tetur18g01480	ATPase; P-type; K/Mg/Cd/Cu/Zn/Na/Ca/Na/H-transporter	0.707908	8.56005	6.05596	1.6411e-05	0.000128199	2.37066
tetur12g02230	potassium voltage-gated channel subfamily D member 2	0.707565	7.43842	5.8345	2.50081e-05	0.000182381	1.93637
tetur07g00830	Novel Hypothetical Cell Adhesion Molecule	0.707006	9.57796	9.39796	6.27261e-08	1.40626e-06	8.14302
tetur35g01360	ABC-transporter; class D;	0.706985	9.53745	7.48231	1.27756e-06	1.57648e-05	5.01274
tetur224g00010	PREDICTED: similar to glucose dehydrogenase	0.705685	12.8705	5.52784	4.52971e-05	0.000295842	1.32502
tetur05g07110	Eukaryotic translation initiation factor 3 subunit A	0.705268	13.6327	6.71414	4.88151e-06	4.74671e-05	3.62367
tetur09g00200	Hypothetical protein	0.705074	6.17734	8.57079	2.18218e-07	3.75324e-06	6.84757
tetur03g06910	Ubiquitin C	0.704469	16.2431	7.57498	1.09261e-06	1.39009e-05	5.17498
tetur15g00340	UDP-glycosyltransferase; teturUGT55	0.704275	7.39154	5.57234	4.15248e-05	0.000274678	1.41442
tetur04g02550	Carboxyl/cholinesterase; similar to neuroligin	0.704271	8.56636	8.06632	4.85844e-07	7.07162e-06	6.01621
tetur33g01210	RNA binding	0.703891	13.1221	4.37832	0.000464155	0.00203656	-1.05252
tetur01g15000	fibroin-7 corr	0.703617	7.62299	8.89487	1.32632e-07	2.55797e-06	7.36491
tetur05g01670	Hypothetical protein	0.703073	6.25049	2.62726	0.0182582	0.0438876	-4.69117
tetur11g00600	cuticle protein	0.7022	11.5625	3.30265	0.00447628	0.0134491	-3.32386
tetur01g06130	ATP synthase subunit alpha; mitochondrial precursor	0.701303	15.0955	8.71593	1.74332e-07	3.16521e-06	7.08085
tetur03g06430	hypothetical protein LOC100273836	0.701242	10.0902	5.36767	6.20756e-05	0.000384874	1.00133
tetur37g00620	pre-mRNA-splicing factor cwc15	0.699075	10.8964	6.14601	1.38539e-05	0.000111729	2.54546
tetur04g00670	cleavage and polyadenylation specificity factor subunit 1	0.698236	11.0828	6.00295	1.81413e-05	0.000139296	2.26727
tetur06g04820	origin recognition complex subunit 5	0.696065	9.12332	8.0402	5.06835e-07	7.30094e-06	5.97229
tetur03g08540	Domain of unknown function DUF2040	0.695933	9.08749	6.58557	6.15733e-06	5.79337e-05	3.38343
tetur11g01520	cysteine and glycine-rich protein 3	0.694668	12.1032	5.1789	9.03629e-05	0.000523699	0.616226
tetur05g09318	Secreted Protein; family A	0.694006	10.5092	4.92696	0.000150137	0.000801805	0.0966652
tetur38g00700	Pleckstrin homology	0.693733	6.99471	12.261	1.44215e-09	5.98493e-08	12.0591
tetur01g02110	homothorax	0.69336	9.08733	7.86109	6.78994e-07	9.38344e-06	5.66868
tetur36g00030	tropomyosin	0.692614	8.87578	7.53584	1.16706e-06	1.46872e-05	5.10659
tetur08g03210	succinate dehydrogenase [ubiquinone] flavoprotein subunit	0.691973	13.7144	9.22643	8.071e-08	1.70183e-06	7.88107
tetur09g01840	Homeobox, conserved site	0.691957	8.44593	5.14657	9.64065e-05	0.000551844	0.549898
tetur03g04290	Major facilitator superfamily; general substrate transporter	0.691901	11.3304	3.8017	0.00155824	0.00552879	-2.27384
tetur02g07480	Orfan gene family A; member-3	0.691699	6.38168	7.03794	2.74747e-06	2.94925e-05	4.21888
tetur03g00080	PREDICTED: similar to sdk-P1	0.691329	9.47631	5.41604	5.64221e-05	0.000355674	1.09938
tetur18g00530	Hypothetical protein	0.691036	11.1112	3.87077	0.00134668	0.00490932	-2.1275
tetur02g03220	UBA-like	0.690849	13.5008	5.63925	3.64525e-05	0.000247827	1.54842
tetur13g02790	GTP-binding protein REM 1	0.690095	8.42704	8.37782	2.95288e-07	4.78311e-06	6.53336
tetur23g01610	Hypothetical protein	0.689216	10.6631	5.18504	8.9261e-05	0.000518175	0.628798
tetur05g04480	glycinamide ribonucleotide synthetase-aminoimidazole ribonucleotide synthetase-glycinamide ribonucleotide transformylase	0.688579	13.1407	2.89461	0.0105287	0.027524	-4.16117
tetur30g01150	Hypothetical protein	0.688233	9.43349	3.96986	0.00109265	0.00414019	-1.91742
tetur11g00870	Nucleotide-binding alpha-beta plait domain	0.684631	8.1094	7.02836	2.794e-06	2.98999e-05	4.20147
tetur10g02960	RPEL repeat	0.682986	8.58055	5.62303	3.762e-05	0.000254087	1.51599
tetur01g91136	hypothetical protein	0.682317	9.62718	6.12893	1.43053e-05	0.000114639	2.51237
tetur02g10540	ALP/Enigma encoding family member	0.68148	10.3584	5.4468	5.31049e-05	0.000338295	1.16161
tetur18g02560	protein kinase C alpha type	0.681265	10.8297	5.93296	2.07199e-05	0.000156341	2.13022
tetur12g04150	zinc finger protein 555	0.680876	12.3312	5.88442	2.27296e-05	0.000169126	2.0348
tetur12g00390	transmembrane protein 63A	0.679053	11.3616	7.98603	5.53468e-07	7.85364e-06	5.8809
tetur08g07840	Phosphatidylinositol transfer protein	0.678148	11.3338	6.52431	6.88312e-06	6.36883e-05	3.26818
tetur12g01980	patched sphingolipid transporter	0.676321	9.66124	5.41357	5.6697e-05	0.000357083	1.09438
tetur31g01170	PREDICTED: similar to Myosin-6	0.676169	7.69118	4.52441	0.000342722	0.00159474	-0.7446
tetur05g06180	ubiquitin carboxyl-terminal hydrolase 10	0.676126	11.5555	4.23898	0.000620841	0.00257956	-1.34711
tetur26g02802	Glutathione S-transferase, C-terminal	0.675905	6.91238	5.02914	0.00012209	0.000671989	0.308108
tetur08g07370	hypothetical protein BRAFLDRAFT_120702	0.674579	8.50172	5.41274	5.679e-05	0.000357508	1.0927
tetur02g01840	Hypothetical protein	0.674518	9.02298	4.81908	0.000187002	0.000960072	-0.127568
tetur02g08910	PREDICTED: similar to Serine/threonine-protein kinase WNK3	0.67419	10.5055	5.75532	2.91193e-05	0.000206636	1.7796
tetur19g00220	ceramide glucosyltransferase	0.673383	8.38427	7.69156	8.98934e-07	1.18364e-05	5.37744
tetur03g05800	High mobility group box domain	0.673252	7.46795	6.8425	3.88022e-06	3.92355e-05	3.86132
tetur03g06670	AGC-kinase; C-terminal	0.673154	11.0722	5.10309	0.000105197	0.000592675	0.460528
tetur41g00580	calponin/transgelin	0.672852	13.3029	3.59232	0.00242647	0.00801579	-2.71643
tetur19g02430	PREDICTED: similar to oxidase/peroxidase	0.672492	7.47739	7.62872	9.98415e-07	1.28787e-05	5.26852
tetur09g01540	Hypothetical protein	0.670598	7.78607	4.92599	0.000150432	0.000802209	0.0946617
tetur02g05250	Small secreted protein; Family G	0.669799	8.08723	3.2707	0.00478836	0.014273	-3.39034
tetur36g00580	cys-loop ligand-gated ion channel; Rdl-homolog	0.668641	7.75073	3.69492	0.00195298	0.00668114	-2.4998
tetur22g00090	Adenylyl cyclase class-4/guanylyl cyclase, conserved site	0.6672	9.33676	4.60984	0.000287271	0.0013789	-0.565097
tetur11g02300	transcription factor GATA	0.66706	10.1263	5.93795	2.05241e-05	0.000155031	2.14001
tetur28g01210	PREDICTED: similar to Serine/threonine-protein kinase 10	0.664617	10.6606	7.48274	1.27663e-06	1.57648e-05	5.0135
tetur07g05310	long-chain fatty acid transport protein 1	0.664033	9.31532	5.56044	4.25004e-05	0.000280201	1.39054
tetur09g02220	Paramyosin homologue	0.663616	10.5152	4.25437	0.000601171	0.00251356	-1.31453
tetur13g03940	zinc finger protein; u-shaped	0.663472	8.04246	5.20263	8.61765e-05	0.000503834	0.664839
tetur01g02340	run; Ortholog of Drosophila melanogaster runt	0.663375	9.42394	4.7681	0.000207537	0.00104662	-0.233865
tetur02g03480	PREDICTED: similar to glucose dehydrogenase	0.663355	9.31338	5.4161	5.64151e-05	0.000355674	1.0995
tetur09g02270	Glutamate receptor-related	0.661147	7.73034	7.50742	1.22441e-06	1.5219e-05	5.05682
tetur01g00360	troponin i	0.660887	10.9169	3.20136	0.00554142	0.0160677	-3.53416
tetur31g01820	Hypothetical protein	0.660337	8.27456	7.50214	1.2354e-06	1.5326e-05	5.04755
tetur29g01600	Ras small GTPase; Rab type	0.65816	12.5192	6.16043	1.34848e-05	0.000109502	2.57334
tetur08g01880	Tyrosine-protein kinase, active site	0.658074	9.06948	5.43131	5.47494e-05	0.000346697	1.13028
tetur04g03930	Chitin binding protein; peritrophin-A	0.657399	8.13434	4.13368	0.000774153	0.00310134	-1.57013
tetur32g01970	CutC family protein	0.65642	8.25499	3.56986	0.00254458	0.00833684	-2.76378
tetur21g00670	Hypothetical protein	0.656199	9.97902	6.5266	6.85446e-06	6.35074e-05	3.2725
tetur23g00170	PAN/Apple domain	0.65601	6.10409	10.026	2.56135e-08	6.58774e-07	9.07366
tetur28g01450	spatacsin	0.655361	7.70604	6.17831	1.30408e-05	0.000106652	2.6079
tetur03g02620	mannose-6-phosphate/insulin-like growth factor II receptor	0.654957	12.7013	6.41576	8.39623e-06	7.45714e-05	3.06274
tetur23g01600	secreted salivary gland peptide; putative	0.65457	11.4798	3.56187	0.00258797	0.0084611	-2.78061
tetur12g02910	Pleckstrin homology	0.654265	7.59602	6.77165	4.40318e-06	4.37307e-05	3.73042
tetur26g02230	Hypothetical protein	0.654046	7.08822	11.5455	3.45094e-09	1.23323e-07	11.1546
tetur26g02490	PREDICTED: similar to pecanex-like protein 1	0.653398	9.50016	5.40467	5.77015e-05	0.000362754	1.07635
tetur13g04330	innexin; putative	0.652904	8.39582	4.72452	0.000226917	0.00112643	-0.324891
tetur29g00800	troponin C	0.651524	12.169	3.97629	0.00107796	0.00409342	-1.9038
tetur20g00210	Hypothetical protein	0.650731	7.79739	4.64326	0.000268157	0.00130013	-0.49501
tetur01g16320	Peptidase S1, trypsin family, active site	0.650548	12.2535	4.01587	0.000991726	0.00381901	-1.81987
tetur14g01720	STOmatin family member	0.650352	8.06971	10.4029	1.52598e-08	4.32486e-07	9.61164
tetur21g02170	acetyl coenzyme A decarboxylase;	0.649943	12.225	5.65109	3.56235e-05	0.000243378	1.57209
tetur01g10230	FERM/acyl-CoA-binding protein, 3-helical bundle	0.648689	12.2672	5.06888	0.000112691	0.000628522	0.390086
tetur11g00970	PREDICTED: similar to limkain b1	0.647971	6.96748	7.08358	2.53659e-06	2.77631e-05	4.30163
tetur13g00620	Hypothetical protein	0.647796	7.0395	4.39604	0.000447347	0.001979	-1.01511
tetur29g00410	Vacuolar ATP synthase 21 kDa proteolipid subunit	0.647653	10.2836	8.86525	1.38736e-07	2.63561e-06	7.31815
tetur09g01130	Novel Hypothetical Cell Adhesion Molecule	0.647374	8.32939	6.66953	5.28964e-06	5.09384e-05	3.54058
tetur09g03350	tropomyosin	0.646492	11.7453	3.94435	0.00115303	0.00433014	-1.97152
tetur02g04220	dolichol kinase	0.646317	8.12741	7.77713	7.79865e-07	1.05475e-05	5.52491
tetur20g03290	dve; Ortholog of Drosophila melanogaster defective proventriculus	0.646158	6.94333	7.81335	7.34547e-07	9.99271e-06	5.58705
tetur452g00010	Legumain	0.64589	9.5062	3.46183	0.0031979	0.0101298	-2.99097
tetur08g03770	serpin peptidase inhibitor; clade B	0.645462	7.1621	5.3715	6.16073e-05	0.000382481	1.0091
tetur14g03190	hypothetical protein IscW_ISCW022785	0.645409	10.9252	3.07641	0.00720435	0.0200955	-3.79156
tetur01g10470	serine/threonine-protein kinase 17A homologue	0.645061	9.03746	5.86682	2.35074e-05	0.000173066	2.00013
tetur02g05310	Hypothetical protein	0.64421	7.07013	7.85105	6.90309e-07	9.49277e-06	5.65153
tetur08g04850	Zinc finger, SWIM-type	0.643421	11.5686	3.64803	0.00215665	0.00726505	-2.59888
tetur06g00630	class V myosin	0.643374	10.5785	4.50333	0.000358014	0.00165055	-0.788963
tetur18g01070	mitochondrial malate dehydrogenase 2; NAD	0.643298	12.0364	4.74794	0.000216282	0.00108366	-0.275955
tetur16g02990	Novel Hypothetical Cell Adhesion Molecule	0.643102	7.82963	6.67382	5.24897e-06	5.05817e-05	3.54857
tetur01g01710	Hypothetical protein	0.64258	14.323	3.36983	0.00388435	0.0119171	-3.18368
tetur32g00930	Peptidase M12B, ADAM/reprolysin	0.641973	9.40753	6.4408	8.01889e-06	7.20925e-05	3.11027
tetur19g02500	Nucleoside phosphorylase	0.641389	8.27801	6.39054	8.79502e-06	7.75698e-05	3.01478
tetur11g01810	WD40/YVTN repeat-like-containing domain	0.640745	9.68032	3.19942	0.00556409	0.01612	-3.53818
tetur02g13060	PREDICTED: retinaldehyde binding protein 1-like	0.640711	10.4117	4.50521	0.000356626	0.00164607	-0.785013
tetur08g00170	Nucleotide-diphospho-sugar transferases	0.640203	8.24806	6.86582	3.72263e-06	3.79724e-05	3.90425
tetur07g04030	Achaete-scute transcription factor-related	0.638801	7.24133	5.53593	4.45858e-05	0.000291743	1.34129
tetur05g08680	Hypothetical protein	0.638789	10.8954	5.24853	7.86364e-05	0.000466598	0.758706
tetur37g00450	discs large protein; putative	0.638512	7.09068	9.39411	6.30793e-08	1.41177e-06	8.13719
tetur02g14070	Immunoglobulin/major histocompatibility complex, conserved site	0.638112	6.86339	7.13947	2.30111e-06	2.56037e-05	4.40259
tetur32g00550	secreted protein; putative	0.6381	7.79132	7.39011	1.49429e-06	1.79315e-05	4.85021
tetur08g01800	PREDICTED: signal-induced proliferation-associated 1 like 1	0.636596	8.56801	5.03072	0.0001217	0.000670217	0.311379
tetur23g00090	macrolide glycosyltransferase	0.636281	6.99877	7.20518	2.05318e-06	2.3295e-05	4.52076
tetur01g13280	Small Secreted Protein; family A	0.636162	15.3277	4.45302	0.000397383	0.00179731	-0.894927
tetur04g03880	hydroxyacylglutathione hydrolase; Glyoxalase II	0.634843	10.5168	9.1727	8.74003e-08	1.80862e-06	7.79831
tetur02g01380	hypothetical protein DDB_G0285635	0.634829	10.1358	3.86335	0.00136796	0.00497127	-2.14323
tetur08g06730	solute carrier family 2	0.634817	11.1977	5.85013	2.42701e-05	0.000178023	1.96723
tetur20g03230	Hypothetical protein	0.634461	12.9389	4.33086	0.000512409	0.00220662	-1.15277
tetur10g04230	PREDICTED: Caffeine Induced Death	0.634431	7.90961	6.14046	1.3999e-05	0.000112741	2.53471
tetur04g08460	tolkin	0.633944	8.69372	6.55495	6.50959e-06	6.09193e-05	3.32589
tetur03g07220	Apple-like	0.633917	8.35805	3.99327	0.00104006	0.00396897	-1.86778
tetur03g04780	putative novel nuclear receptor	0.633385	10.0133	5.81726	2.58487e-05	0.000187141	1.90231
tetur17g00360	Carboxyl/cholinesterase; incomplete	0.633362	10.1342	3.14687	0.00621421	0.0176845	-3.64671
tetur17g01330	fatty acid synthase	0.633025	8.70558	5.96663	1.94352e-05	0.000147928	2.19622
tetur01g04580	Serine proteases, trypsin family, histidine active site	0.632751	8.34643	5.68947	3.30696e-05	0.000228959	1.64864
tetur02g00620	Winged helix-turn-helix DNA-binding domain	0.631951	7.56248	5.32916	6.69946e-05	0.000408889	0.92306
tetur03g00500	similar to pre-mRNA splicing factor ATP-dependent RNA helicase PRP22 [Tetranychus urticae]	0.631685	9.93212	8.57827	2.15694e-07	3.72139e-06	6.85965
tetur25g00970	hyperpolarization-activated ion channel	0.631578	8.11181	6.43455	8.11149e-06	7.27842e-05	3.0984
tetur19g00040	FERM/acyl-CoA-binding protein; 3-helical bundle	0.631436	8.04456	5.64488	3.60556e-05	0.000245608	1.55968
tetur72g00030	PREDICTED: similar to CG31534 CG31534-PA	0.63088	7.24261	7.65444	9.56367e-07	1.24136e-05	5.31317
tetur26g01940	Hypothetical protein	0.62889	9.50627	7.06734	2.60961e-06	2.8362e-05	4.27222
tetur01g10850	Hypothetical protein	0.628866	10.8439	4.51227	0.000351447	0.0016281	-0.77015
tetur16g03490	antigen B membrane protein	0.627831	6.95916	6.41672	8.38141e-06	7.45347e-05	3.06457
tetur26g01860	CTF transcription factor/nuclear factor 1, N-terminal	0.627428	10.6893	3.5477	0.00266674	0.00868605	-2.81046
tetur22g00750	dopa decarboxylase	0.627159	9.19327	7.75852	8.04273e-07	1.0846e-05	5.49292
tetur04g03630	Small GTPase; Rho type	0.627155	7.96214	7.56642	1.10847e-06	1.40513e-05	5.16003
tetur36g01010	ENTH/VHS	0.626987	11.0296	5.50302	4.75537e-05	0.000308381	1.27505
tetur05g07520	Anion/Bicarbonate TranSporter family member	0.626944	7.83925	7.10317	2.45132e-06	2.70412e-05	4.33706
tetur02g11670	muscular protein 20	0.626527	12.3964	5.77232	2.81809e-05	0.000201237	1.81333
tetur23g02452	P-loop containing nucleoside triphosphate hydrolase	0.625067	9.52474	5.6076	3.87667e-05	0.000260262	1.4851
tetur05g01240	Tweety	0.625042	11.7142	4.23382	0.000627583	0.00260447	-1.35803
tetur04g09060	dynein light chain	0.624091	9.4313	8.74434	1.66885e-07	3.05787e-06	7.12621
tetur35g01110	Zinc finger; CCCH-type	0.623857	11.577	7.13134	2.33389e-06	2.589e-05	4.38794
tetur30g01510	disabled homolog 1	0.623695	10.3192	3.87909	0.00132324	0.00484186	-2.10987
tetur03g02500	synaptotagmin	0.622989	7.38706	5.59817	3.94848e-05	0.000264446	1.46622
tetur09g03110	Hypothetical protein	0.622876	13.2197	5.65059	3.56584e-05	0.000243497	1.57108
tetur03g04660	Zinc finger, C2H2-like	0.622366	7.53813	6.62077	5.77678e-06	5.48716e-05	3.44943
tetur17g02510	ABC-transporter; class G	0.622119	8.0173	2.75144	0.0141571	0.0353839	-4.44726
tetur01g16520	Secreted low complexity protein; putative	0.621225	7.41695	4.13228	0.000776431	0.00310929	-1.5731
tetur22g01850	Homeobox protein HMX3	0.620957	8.25605	5.44601	5.3188e-05	0.0003385	1.16
tetur06g04450	Glycine-rich secreted protein	0.620857	8.27046	2.6699	0.016736	0.0407343	-4.60792
tetur02g09660	Zinc finger; PHD-finger	0.620338	11.2119	7.46436	1.31703e-06	1.61229e-05	4.98118
tetur11g01290	Zinc finger; RING-type	0.620246	8.62824	6.03183	1.71764e-05	0.000133356	2.32364
tetur03g04770	Hypothetical protein	0.618949	6.84248	6.4316	8.15541e-06	7.30842e-05	3.09282
tetur07g05500	Cytochrome P450 - CYP385A1	0.618759	8.08846	6.25705	1.12597e-05	9.49824e-05	2.75954
tetur21g01260	Marvel	0.618649	11.0145	5.7269	3.07605e-05	0.000215649	1.72315
tetur03g07300	Hypothetical protein	0.617451	7.5591	7.16129	2.21547e-06	2.48133e-05	4.4419
tetur21g02420	DEAD/DEAH box DNA helicase	0.616814	8.0148	6.18005	1.29986e-05	0.000106431	2.61125
tetur40g00090	Thyroglobulin type-1	0.616521	8.46748	5.31063	6.9502e-05	0.000422098	0.885358
tetur20g00770	Ankyrin repeat-containing domain	0.614775	12.0659	4.86034	0.000171912	0.000895201	-0.0416816
tetur06g06658	6-phosphogluconate dehydrogenase C-terminal domain-like	0.614703	11.6534	4.18994	0.000687982	0.00281409	-1.45093
tetur10g00520	virilizer homolog [Tetranychus urticae]	0.614636	11.0243	5.07191	0.000112006	0.000625729	0.39632
tetur07g04630	Ca2+-dependent secretion activator; isoform CRA_b	0.613217	6.85327	5.45258	5.25049e-05	0.00033507	1.17328
tetur06g06190	PREDICTED: protein kinase D1-like	0.612835	11.3563	7.35568	1.58482e-06	1.87914e-05	4.78921
tetur08g03890	Nose resistant-to-fluoxetine protein, N-terminal	0.612554	6.8014	5.38664	5.9792e-05	0.000373539	1.03981
tetur03g02410	zinc finger protein	0.612541	9.14979	7.80998	7.38642e-07	1.00243e-05	5.58128
tetur07g02030	Retinoblastoma-family protein (Rbf)	0.612139	11.0601	5.09513	0.000106894	0.000600538	0.444142
tetur34g00170	Leucine-rich repeat domain, L domain-like	0.611465	8.66338	5.84012	2.47401e-05	0.000180711	1.94746
tetur04g00970	DZF	0.610879	11.4892	5.66128	3.49263e-05	0.000239318	1.59242
tetur04g05020	Armadillo-type fold	0.610582	8.01782	4.40476	0.000439305	0.00195023	-0.996712
tetur19g02140	Clarin	0.609482	9.5578	4.89348	0.000160704	0.000845286	0.0271767
tetur02g03100	Bicarbonate transporter; eukaryotic	0.607882	11.8516	3.24085	0.00509923	0.015042	-3.45233
tetur19g02000	Vesicle transport protein GOT1	0.607107	11.2546	5.3711	6.1656e-05	0.000382613	1.00829
tetur32g02170	PREDICTED: tripartite motif protein 2-like	0.606477	6.70104	7.85531	6.85484e-07	9.46375e-06	5.65881
tetur05g05190	Glutathione S-transferase; class mu	0.60545	9.56059	2.82497	0.0121641	0.0310881	-4.30095
tetur29g00290	tropomyosin	0.603151	9.70138	4.64542	0.000266965	0.00129527	-0.490472
tetur08g03730	SET translocation	0.602621	11.7931	7.09547	2.48447e-06	2.73213e-05	4.32314
tetur24g02450	Homeobox, conserved site	0.602297	6.53042	9.80762	3.48054e-08	8.48474e-07	8.75506
tetur07g01870	PREDICTED: similar to glucose dehydrogenase	0.602195	6.4778	9.85542	3.25317e-08	8.00038e-07	8.82525
tetur07g03190	histone-lysine N-methyltransferase SETD1B-like	0.602192	10.6257	4.87119	0.000168158	0.000878734	-0.0191344
tetur02g00070	TPA: TPA_inf: HDC17641	0.601973	6.85639	5.28829	7.26547e-05	0.000436868	0.839848
tetur01g13380	zinc finger protein 143	0.601577	11.3747	7.44648	1.35759e-06	1.65474e-05	4.94972
tetur04g00800	E3 ubiquitin-protein ligase MARCH6	0.601439	12.1533	6.08998	1.53918e-05	0.000121876	2.43682
tetur13g01190	Aconitase family, 4Fe-4S cluster binding site	0.600628	13.3829	5.84261	2.46225e-05	0.000180034	1.95238
tetur17g00600	PREDICTED: similar to Band 4.1-like protein 3	0.600557	8.94554	6.18987	1.27621e-05	0.000104953	2.6302
tetur08g05110	Hypothetical protein	0.600374	8.13045	2.96703	0.00905552	0.0242454	-4.01472
tetur28g00400	transcription factor Maf	0.599774	10.9801	7.8372	7.0623e-07	9.68148e-06	5.62786
tetur36g01150	Hypothetical protein	0.599364	8.92119	5.62292	3.76283e-05	0.000254087	1.51576
tetur01g05660	Glycine-rich secreted protein	0.599272	13.4507	2.88057	0.0108402	0.0282165	-4.18944
tetur03g02600	Endoglin/CD105 antigen	0.598387	7.5094	8.78766	1.56165e-07	2.89955e-06	7.19519
tetur08g04980	G-protein coupled receptor	0.597986	7.57396	5.28931	7.25075e-05	0.000436171	0.841928
tetur09g01950	ABC-transporter; class G	0.597844	11.7898	4.5218	0.000344583	0.00160162	-0.750106
tetur20g02540	Scr; Ortholog of Drosophila melanogaster Sex combs reduced	0.597773	8.53185	5.30575	7.0179e-05	0.000424729	0.875414
tetur11g05070	Neuropeptide precursor.	0.597221	9.47261	6.88618	3.59052e-06	3.68947e-05	3.94167
tetur08g04880	ring finger protein 13	0.59696	11.3521	4.61133	0.000286391	0.00137658	-0.561973
tetur04g05280	PREDICTED: similar to igf2 mRNA binding protein; putative	0.596861	12.7833	5.83611	2.4931e-05	0.000181914	1.93955
tetur23g02451	FAD-dependent glycerol-3-phosphate dehydrogenase	0.595705	10.7874	4.65514	0.000261677	0.00127627	-0.4701
tetur09g03600	Novel Expressed Low complexity Protein	0.595134	9.7087	9.19548	8.44957e-08	1.76378e-06	7.83343
tetur26g00090	PREDICTED: ubiquitin protein ligase E3 component n-recognin 2	0.594962	12.4063	4.7805	0.000202339	0.00102747	-0.207996
tetur27g00280	Cytochrome P450 -	0.594896	10.4643	2.92824	0.00981769	0.0258944	-4.0933
tetur26g00740	ras-related protein Rab-32	0.592799	8.28864	3.78384	0.00161818	0.00570661	-2.31166
tetur09g01970	ABC-transporter; class G	0.591995	9.15633	5.36241	6.27256e-05	0.000387698	0.990637
tetur11g04210	troponin i	0.591816	9.9868	5.06374	0.000113864	0.000633316	0.379483
tetur02g12070	transcription factor SOX-2	0.591799	9.81299	3.45793	0.00322439	0.0102045	-2.99916
tetur04g04470	synaptotagmin	0.591702	10.1618	5.37348	6.13666e-05	0.000381273	1.01312
tetur14g00130	3'5'-cyclic nucleotide phosphodiesterase, conserved site	0.59094	9.26648	3.66467	0.00208205	0.00705518	-2.56373
tetur23g01450	Hypothetical protein	0.590193	8.75595	5.39378	5.89549e-05	0.000369316	1.05428
tetur04g03740	Tetratricopeptide-like helical	0.590138	9.09358	5.21904	8.33981e-05	0.000490469	0.698431
tetur11g06220	EF-Hand 1, calcium-binding site	0.589833	7.31218	5.16439	9.30258e-05	0.00053557	0.586467
tetur10g03040	metallothionein	0.589628	13.9534	3.61599	0.0023079	0.00768831	-2.66649
tetur08g03180	PREDICTED: similar to Polyadenylate-binding protein 1	0.589591	16.1229	6.38396	8.90226e-06	7.82308e-05	3.00225
tetur20g01750	CDP-diacylglycerol synthase	0.589404	10.2214	4.15818	0.000735348	0.00297122	-1.5182
tetur16g02750	Hypothetical protein	0.588926	9.33457	4.41525	0.000429824	0.00191607	-0.974576
tetur08g07870	GTP-binding protein Di-Ras2	0.588792	7.83739	7.46334	1.3193e-06	1.61229e-05	4.9794
tetur06g04490	GSK3-beta interaction protein	0.58861	9.45737	5.16449	9.30076e-05	0.00053557	0.586667
tetur11g04110	Zinc finger; C2H2 type	0.58732	8.76593	6.53978	6.69187e-06	6.22906e-05	3.29733
tetur01g02400	Hypothetical protein	0.587131	8.93612	4.87856	0.000165655	0.000866749	-0.00381475
tetur238g00010	Fibroin	0.586831	13.2039	2.75742	0.0139841	0.0349891	-4.43543
tetur10g01250	Prolyl 4-hydroxylase; alpha subunit	0.586215	8.50774	3.79243	0.00158906	0.00562097	-2.29346
tetur29g01450	adenylate kinase 1	0.585948	10.4759	2.81442	0.0124323	0.0317212	-4.32202
tetur30g02120	Hypothetical protein	0.585901	6.62673	6.97152	3.08769e-06	3.2446e-05	4.09793
tetur11g02460	Zinc finger, LIM-type	0.585451	8.85538	6.0069	1.8006e-05	0.000138639	2.27498
tetur05g09319	SMAD domain, Dwarfin-type	0.585285	9.0291	5.88071	2.28913e-05	0.000170056	2.0275
tetur20g02290	5-oxoprolinase	0.585055	10.3695	6.50675	7.10718e-06	6.5328e-05	3.23506
tetur29g01400	Neuropeptide precursor	-0.585589	9.07199	-6.48369	7.41302e-06	6.7693e-05	3.19149
tetur10g00390	enhanced entry protein EnhC	-0.58585	11.4622	-7.49951	1.2409e-06	1.53669e-05	5.04294
tetur26g01120	FAD dependent oxidoreductase	-0.585952	11.7978	-9.11815	9.47928e-08	1.93873e-06	7.71394
tetur03g02810	Carboxyl/cholinesterase; incomplete	-0.58665	6.87282	-7.83295	7.1119e-07	9.72239e-06	5.62059
tetur10g02790	S-formylglutathione hydrolase	-0.587013	11.3864	-5.06703	0.000113111	0.000630383	0.386277
tetur12g03150	Cwf19-like protein, C-terminal domain-2	-0.587701	9.7746	-8.65029	1.92903e-07	3.40917e-06	6.97568
tetur04g06230	Y+L amino acid transporter 2	-0.587903	11.9354	-5.76874	2.83762e-05	0.000202393	1.80622
tetur01g01280	Hypothetical protein	-0.587909	7.66109	-5.82417	2.55083e-05	0.000185254	1.91596
tetur09g05870	beta-galactosidase	-0.588806	12.0549	-5.18363	8.95127e-05	0.00051942	0.625912
tetur26g00780	Hypothetical protein	-0.588854	10.8812	-7.21576	2.01595e-06	2.29472e-05	4.53973
tetur21g00320	tRNA	-0.589821	9.77429	-7.14915	2.2627e-06	2.53017e-05	4.42004
tetur11g04720	Hypothetical protein	-0.589842	9.60282	-3.92511	0.00120077	0.00447331	-2.01231
tetur17g02860	wnt inhibitory factor 1 precursor	-0.590648	10.2875	-4.28514	0.000563723	0.00238271	-1.24944
tetur32g00780	Selenophosphate synthetase; Selenide water dikinase	-0.590947	12.7891	-2.93922	0.0095957	0.0254426	-4.07107
tetur09g02760	ERO1-like protein alpha precursor	-0.591351	11.4563	-6.65651	5.41537e-06	5.18983e-05	3.51627
tetur09g06240	Hypothetical protein	-0.591567	10.0665	-5.58843	4.02417e-05	0.000268227	1.44669
tetur15g02510	Hypothetical protein	-0.591931	7.63661	-6.16016	1.34915e-05	0.000109502	2.57282
tetur02g07450	Aldo-keto reductase family E; member 1	-0.592251	9.77485	-7.43783	1.37768e-06	1.67193e-05	4.93448
tetur02g04850	Phospholipase B-like	-0.592366	10.4789	-4.23192	0.000630076	0.00261093	-1.36204
tetur02g10770	AGAP002847-PA	-0.592583	15.2639	-2.70081	0.0157092	0.0386807	-4.54722
tetur28g01780	Hypothetical protein	-0.592752	9.14493	-7.2952	1.75797e-06	2.04106e-05	4.68169
tetur01g08350	otoferlin	-0.593484	9.30916	-6.07292	1.58946e-05	0.000125076	2.40365
tetur14g01600	cyclophilin	-0.593583	6.91337	-7.68158	9.14009e-07	1.19478e-05	5.36018
tetur11g04990	Nuclear hormone receptor, ligand-binding domain	-0.593615	10.0489	-4.71539	0.000231208	0.00114568	-0.343982
tetur26g00720	ribosome production factor 1; U3 Small nucleolar ribonucleoprotein IMP4	-0.593764	11.3908	-6.52791	6.83809e-06	6.33978e-05	3.27497
tetur21g01840	Complex 1 LYR protein	-0.594835	10.0642	-6.68767	5.1196e-06	4.95404e-05	3.57439
tetur01g06150	zinc finger protein 622	-0.594841	11.5702	-6.0429	1.6821e-05	0.000130815	2.34521
tetur07g00720	Hypothetical protein	-0.595278	7.18996	-7.86814	6.71172e-07	9.31448e-06	5.68071
tetur01g12810	Subunit of the SAGA transcriptional regulatory complex; involved in proper assembly of the complex	-0.595851	9.14312	-8.43611	2.69376e-07	4.43993e-06	6.62876
tetur23g01420	mitochondrial inner membrane protease ATP23 homolog	-0.596713	11.7553	-7.61129	1.028e-06	1.31629e-05	5.23822
tetur02g00980	hypothetical protein	-0.597478	6.61544	-7.01983	2.83617e-06	3.02583e-05	4.18595
tetur02g08530	Tubulin-specific chaperone A	-0.597503	12.4286	-5.0845	0.000109204	0.000611574	0.422258
tetur13g01510	Thioredoxin-like fold	-0.597505	10.8233	-10.2467	1.88818e-08	5.11238e-07	9.39042
tetur03g03900	ZnF_C2H2 domain-containing protein	-0.597798	12.999	-3.71855	0.00185772	0.00640873	-2.44982
tetur02g13570	Alpha/Beta hydrolase fold	-0.59799	10.0989	-4.41095	0.000433682	0.00193018	-0.983643
tetur03g06100	Nose resistant-to-fluoxetine protein; N-terminal	-0.599014	9.36619	-3.37201	0.00386656	0.0118707	-3.17914
tetur13g01810	serine/threonine-protein kinase 3	-0.599157	10.7253	-5.29723	7.13754e-05	0.000430848	0.858071
tetur01g14540	Ras-association	-0.599317	10.8612	-4.89384	0.000160585	0.000845143	0.0279322
tetur05g08340	Serine proteases, trypsin family, histidine active site	-0.599937	10.2878	-5.06534	0.000113496	0.000632026	0.382796
tetur15g00980	Helix-turn-helix, base-excision DNA repair, C-terminal	-0.599942	9.84019	-5.8979	2.21523e-05	0.000165625	2.06132
tetur13g00360	Hypothetical protein	-0.601018	8.7807	-7.43912	1.37469e-06	1.66974e-05	4.93674
tetur05g07230	histone H2A	-0.60114	10.533	-5.01096	0.000126654	0.000692303	0.270563
tetur10g01110	Angiomotin	-0.601295	11.3991	-7.68082	9.1517e-07	1.19486e-05	5.35886
tetur02g04290	syntaxin	-0.60159	9.25427	-5.68567	3.33135e-05	0.000230076	1.64108
tetur47g00190	Hypothetical protein	-0.602528	8.37859	-8.16666	4.13296e-07	6.19677e-06	6.18415
tetur05g05390	something about silencing protein 10	-0.60284	10.9217	-7.03858	2.74438e-06	2.9482e-05	4.22004
tetur03g08240	Hypothetical protein	-0.603008	7.38701	-8.79717	1.53911e-07	2.86916e-06	7.2103
tetur01g11470	Endonuclease/exonuclease/phosphatase	-0.60448	11.8802	-6.43812	8.05843e-06	7.23546e-05	3.10519
tetur19g01650	cell division control protein 2 homolog	-0.604593	13.3259	-6.417	8.37713e-06	7.45347e-05	3.06509
tetur21g02240	RNA	-0.605344	10.2342	-6.04921	1.66217e-05	0.000129482	2.3575
tetur02g14220	PREDICTED: similar to enhancer of yellow 2 homolog	-0.606901	10.3736	-5.70375	3.21683e-05	0.000223606	1.67708
tetur32g01810	Probable protein BRICK1	-0.607726	9.13904	-5.53619	4.45633e-05	0.000291743	1.34181
tetur07g02610	Leucine-rich repeat domain, L domain-like	-0.607813	9.50359	-3.46791	0.00315707	0.0100278	-2.97822
tetur09g05290	sn1-specific diacylglycerol lipase alpha	-0.608498	9.47228	-6.1944	1.26544e-05	0.000104225	2.63895
tetur36g00660	membrane-bound transcription factor site-2 protease	-0.609536	10.6695	-5.81567	2.59278e-05	0.000187476	1.89916
tetur40g00220	Hypothetical protein	-0.609543	9.78571	-5.18931	8.85006e-05	0.000514617	0.637565
tetur01g07290	ribonucleoside-diphosphate reductase large subunit	-0.610721	13.6795	-6.64455	5.53363e-06	5.27777e-05	3.49392
tetur31g01390	Glutathione S-transferase; class delta	-0.610848	8.67197	-7.74935	8.16592e-07	1.09803e-05	5.47715
tetur03g06030	cell division protein BolA	-0.611105	9.24481	-6.42036	8.32565e-06	7.41808e-05	3.07147
tetur09g01000	Hypothetical protein	-0.611589	9.13831	-5.87594	2.3101e-05	0.000170886	2.0181
tetur01g15840	Hypothetical protein	-0.611814	11.4299	-8.92997	1.25763e-07	2.43561e-06	7.42017
tetur26g01070	N	-0.61248	9.09382	-8.0513	4.97804e-07	7.2006e-06	5.99096
tetur03g02030	Hypothetical protein	-0.613595	7.03815	-5.66549	3.4642e-05	0.00023772	1.60084
tetur37g00840	Cyclin-like	-0.61368	12.5014	-7.74206	8.26535e-07	1.10607e-05	5.46458
tetur19g01410	Hypothetical protein	-0.61376	7.5985	-6.23033	1.18338e-05	9.86632e-05	2.70818
tetur05g00370	variable lymphocyte receptor A diversity region	-0.614796	9.30099	-3.74235	0.00176655	0.00614284	-2.39948
tetur04g03500	4-aminobutyrate aminotransferase; mitochondrial	-0.614963	6.92947	-4.95677	0.000141331	0.000761779	0.158443
tetur08g06290	punt	-0.615128	11.4534	-4.49842	0.000361677	0.00166251	-0.799305
tetur02g08830	Hypothetical protein	-0.615552	7.49115	-8.75346	1.64566e-07	3.02333e-06	7.14075
tetur07g02490	Short-chain dehydrogenase/reductase SDR	-0.615922	11.838	-2.86132	0.011282	0.0291704	-4.22813
tetur11g05840	large subunit GTPase 1 homolog	-0.616486	7.73396	-8.98759	1.15284e-07	2.26731e-06	7.51057
tetur12g01220	Hypothetical protein	-0.616587	8.88114	-6.32334	9.95662e-06	8.54896e-05	2.88659
tetur09g92864	hypothetical protein	-0.617187	7.4492	-2.56552	0.0206998	0.0486577	-4.81079
tetur86g00020	Nuclear hormone receptor, ligand-binding domain	-0.618008	10.4099	-6.49306	7.28721e-06	6.66751e-05	3.20919
tetur12g01280	Hypothetical protein	-0.618107	8.79633	-5.53054	4.50587e-05	0.000294423	1.33045
tetur36g01130	Leucine-rich repeat domain, L domain-like	-0.61861	10.7051	-4.89925	0.000158827	0.000839532	0.039175
tetur03g05540	Cytochrome P450 - CYP392E1	-0.620293	10.0678	-3.59011	0.00243785	0.0080496	-2.7211
tetur03g01730	Histone H4	-0.620417	13.8333	-7.39396	1.48452e-06	1.7845e-05	4.85701
tetur13g02090	LY6_UPAR protein	-0.620574	8.06721	-5.57364	4.14194e-05	0.000274111	1.41703
tetur04g08270	PREDICTED: similar to Usher syndrome 1G homolog	-0.621151	10.578	-6.01899	1.75985e-05	0.000136028	2.29859
tetur01g03050	SAP30-binding protein	-0.621461	11.555	-9.72946	3.88907e-08	9.30175e-07	8.63974
tetur11g04700	Lipase	-0.62232	7.3015	-6.96747	3.10979e-06	3.26528e-05	4.09054
tetur04g01370	zinc/iron transporter; putative	-0.622623	7.17955	-4.06227	0.00089948	0.00353107	-1.7215
tetur06g00270	BTB/POZ-like	-0.622653	8.42042	-8.98506	1.15724e-07	2.27276e-06	7.50661
tetur19g03070	Domain of unknown function DUF4061	-0.622981	10.5215	-6.26463	1.11021e-05	9.39936e-05	2.7741
tetur33g00560	Hypothetical protein	-0.623943	7.6306	-6.42432	8.26528e-06	7.38315e-05	3.07899
tetur36g01260	choline/ethanolamine kinase	-0.6248	13.0548	-5.02883	0.000122167	0.000671989	0.307466
tetur26g00930	phosphatidylethanolamine-binding protein	-0.625265	7.35083	-3.81423	0.00151751	0.00540719	-2.2473
tetur01g01990	Hypothetical protein	-0.625286	9.61065	-4.16269	0.000728434	0.00295013	-1.50866
tetur11g01110	PREDICTED: similar to limkain b1	-0.626334	7.45334	-7.34393	1.61699e-06	1.90917e-05	4.76837
tetur05g08440	putative glucose-6-phosphate translocator	-0.627688	11.8456	-9.50701	5.35278e-08	1.23371e-06	8.30781
tetur37g00320	receptor associated protein RIC-3	-0.628467	8.66386	-5.56648	4.20024e-05	0.000277443	1.40266
tetur31g00080	ATP-dependent RNA helicase DBP4	-0.628622	9.90558	-5.41728	5.6284e-05	0.000355124	1.10189
tetur04g04920	Schwannomin interacting protein 1	-0.629646	12.664	-6.39868	8.66412e-06	7.66577e-05	3.03028
tetur03g10029	Hemopexin-like repeats	-0.629755	7.25817	-5.49831	4.79949e-05	0.000310552	1.26556
tetur08g07810	Hypothetical protein	-0.629975	8.77013	-6.52068	6.92887e-06	6.4069e-05	3.26133
tetur24g00280	Cathepsin B	-0.630982	9.81907	-5.26373	7.62924e-05	0.000455013	0.789739
tetur01g06330	PHF5-like	-0.631228	10.9618	-6.20307	1.24512e-05	0.000102673	2.65567
tetur02g14190	Rieske [2Fe-2S] iron-sulphur domain	-0.631967	6.85631	-5.33715	6.59414e-05	0.000404704	0.939321
tetur14g03630	Hypothetical protein	-0.632125	11.1662	-6.45671	7.78839e-06	7.04288e-05	3.14042
tetur02g03800	Hypothetical protein	-0.632214	7.57874	-6.43349	8.12729e-06	7.2879e-05	3.09639
tetur14g01900	Basic-leucine zipper (bZIP) transcription factor	-0.632409	12.9567	-5.19767	8.70344e-05	0.000507786	0.654687
tetur10g02780	serine carboxypeptidase; putative	-0.632665	14.8588	-7.59889	1.04961e-06	1.34149e-05	5.21664
tetur13g02040	peptidyl-prolyl cis-trans isomerase B	-0.633023	8.80105	-5.21742	8.36691e-05	0.000491649	0.695105
tetur30g01170	GH24597	-0.633067	12.2423	-7.42435	1.40963e-06	1.70476e-05	4.9107
tetur19g00600	Protein of unknown function DUF2217	-0.633413	12.2	-10.2704	1.82771e-08	5.03666e-07	9.42424
tetur32g01260	Hypothetical protein	-0.635981	6.9035	-8.09779	4.61755e-07	6.79188e-06	6.06902
tetur17g00200	Bifunctional coenzyme A synthase	-0.636183	7.9885	-8.53726	2.29916e-07	3.90941e-06	6.79331
tetur27g02430	vacuolar protein sorting-associated protein 45	-0.636484	11.7902	-8.66226	1.89366e-07	3.35603e-06	6.9949
tetur05g09080	transmembrane protein 62	-0.636839	11.0553	-7.13846	2.30514e-06	2.56119e-05	4.40078
tetur05g08480	lysophospholipase	-0.637465	12.5905	-12.0762	1.7994e-09	7.25169e-08	11.8298
tetur09g06200	Hypothetical protein	-0.637786	6.69545	-8.59002	2.1179e-07	3.66857e-06	6.87863
tetur08g00030	secretagogin	-0.638014	9.28558	-7.1888	2.11227e-06	2.38104e-05	4.49135
tetur03g01560	Cytochrome P450 - CYP382A1	-0.638353	9.48535	-4.7236	0.000227348	0.00112816	-0.326823
tetur04g08870	Alpha/Beta hydrolase fold	-0.638377	9.01829	-5.44678	5.31072e-05	0.000338295	1.16156
tetur01g11760	peptidase M28	-0.638681	7.40197	-7.21225	2.02823e-06	2.30307e-05	4.53343
tetur09g00900	Hypothetical protein	-0.639709	9.8196	-5.51945	4.60474e-05	0.0002999	1.30814
tetur02g12590	hormone-sensitive lipase	-0.639813	10.5371	-4.82746	0.000183831	0.00094763	-0.110113
tetur22g02090	Major facilitator superfamily; general substrate transporter	-0.639929	9.1848	-8.02471	5.1973e-07	7.46355e-06	5.9462
tetur09g04300	Hypothetical protein	-0.640049	7.4805	-5.7582	2.8958e-05	0.000206015	1.78532
tetur07g05260	trans-2-enoyl-CoA reductase; mitochondrial precursor	-0.640684	14.1889	-4.90684	0.000156398	0.000829207	0.0549203
tetur65g00010	Leucine-rich repeat domain, L domain-like	-0.641872	6.70187	-5.5849	4.05197e-05	0.000269523	1.43962
tetur04g02050	hypothetical protein IscW_ISCW020080	-0.641907	8.8845	-3.93695	0.00117115	0.00438286	-1.9872
tetur16g00430	Hypothetical protein	-0.642505	7.99781	-8.9224	1.27211e-07	2.45683e-06	7.40827
tetur02g04630	superoxide dismutase	-0.642572	7.53094	-10.8552	8.35074e-09	2.58188e-07	10.2377
tetur22g02540	GTPase ObgE	-0.642679	10.4853	-7.97146	5.66757e-07	8.0232e-06	5.85626
tetur08g03880	UDP-glucuronic acid decarboxylase 1	-0.64275	10.3261	-7.47934	1.28401e-06	1.58165e-05	5.00752
tetur09g02020	Transcription factor IIIC, 90kDa subunit, N-terminal	-0.642942	9.82357	-8.23522	3.70331e-07	5.6798e-06	6.29815
tetur05g08290	Hypothetical protein	-0.643649	7.82491	-7.26164	1.86248e-06	2.13572e-05	4.62182
tetur13g02960	Hypothetical protein	-0.644268	9.4578	-4.11978	0.000797076	0.00317856	-1.59959
tetur02g10940	glucosylceramidase precursor	-0.644626	12.4218	-3.67471	0.00203827	0.00693378	-2.54251
tetur03g02980	putative cuticle protein	-0.64507	9.57533	-3.56714	0.00255926	0.00837904	-2.76951
tetur36g00250	partner of drosha 2	-0.645186	11.3206	-6.91753	3.39653e-06	3.51866e-05	3.99919
tetur43g00310	Clathrin/coatomer adaptor; adaptin-like; appendage; Ig-like subdomain	-0.645471	12.1344	-7.11548	2.39924e-06	2.65516e-05	4.35931
tetur31g00980	Zinc finger, RING/FYVE/PHD-type	-0.646035	11.7473	-8.11346	4.50227e-07	6.64335e-06	6.09527
tetur28g00660	PLC-like phosphodiesterase, TIM beta/alpha-barrel domain	-0.646218	7.44529	-9.23431	7.9775e-08	1.68799e-06	7.89317
tetur06g02180	Serine proteases, trypsin family, histidine active site	-0.646272	8.30984	-6.35053	9.46856e-06	8.21079e-05	2.93852
tetur13g02770	activating signal cointegrator 1 (ASC1)complex subunit 1	-0.646507	10.0261	-8.21607	3.81837e-07	5.79362e-06	6.26637
tetur05g05090	UDP-glycosyltransferase; teturUGT30	-0.646882	9.72341	-7.19862	2.07664e-06	2.35065e-05	4.50898
tetur08g05640	Transmembrane protein 161A/B	-0.648846	10.5641	-8.1268	4.40656e-07	6.53352e-06	6.11759
tetur14g01550	Hypothetical protein	-0.648969	8.71347	-8.46895	2.5584e-07	4.25201e-06	6.68232
tetur08g05700	Metal-dependent protein hydrolase	-0.649109	7.86093	-4.5864	0.000301507	0.00143587	-0.614312
tetur09g05190	Hypothetical protein	-0.649318	9.8785	-6.84582	3.85741e-06	3.90615e-05	3.86742
tetur18g03250	trans-sialidase	-0.649724	9.08355	-5.74761	2.95555e-05	0.000209093	1.76429
tetur03g08500	ketohexokinase	-0.649898	10.7707	-4.84238	0.000178322	0.000923329	-0.0790561
tetur15g03890	Hypothetical protein	-0.650151	6.49857	-8.98836	1.1515e-07	2.26731e-06	7.51178
tetur19g02560	Acyl-CoA N-acyltransferase	-0.650422	11.5957	-6.16548	1.33578e-05	0.000108627	2.5831
tetur09g05250	Hypothetical protein	-0.650598	13.5359	-5.94648	2.01937e-05	0.000152867	2.15674
tetur02g13800	DNA-directed RNA polymerases I and III subunit RPAC2	-0.650972	10.2014	-8.53788	2.29696e-07	3.90941e-06	6.79431
tetur01g12600	Hypothetical protein	-0.651942	9.75486	-6.06058	1.62689e-05	0.000127517	2.37964
tetur03g03650	dephospho-CoA kinase	-0.651981	9.69804	-8.32905	3.18976e-07	5.06583e-06	6.45321
tetur32g01890	Leucine-rich repeat domain, L domain-like	-0.652139	8.3071	-6.86322	3.73988e-06	3.80927e-05	3.89946
tetur25g00230	scavenger receptor class B; member 2	-0.65309	13.9606	-8.75445	1.64316e-07	3.02273e-06	7.14233
tetur36g01170	heterochromatin protein 1	-0.653591	11.687	-9.84819	3.28655e-08	8.05406e-07	8.81465
tetur02g07830	cuticular protein analogous to peritrophins 1-A	-0.653603	10.3446	-4.94669	0.000144246	0.000775392	0.137575
tetur21g02500	P-loop containing nucleoside triphosphate hydrolase	-0.654292	8.81084	-5.5057	4.73047e-05	0.000307227	1.28045
tetur08g07980	TVP18/Calcium channel flower	-0.654668	10.6642	-6.76997	4.4164e-06	4.38308e-05	3.72731
tetur10g04350	Pleckstrin homology	-0.655557	10.6216	-7.3698	1.54702e-06	1.83589e-05	4.81424
tetur77g00070	Deoxyuridine triphosphate nucleotidohydrolase/Deoxycytidine triphosphate deaminase	-0.655666	6.92788	-2.79935	0.0128255	0.0325695	-4.35207
tetur05g06700	Small Secreted Protein; Family G	-0.655801	8.52649	-6.8783	3.64105e-06	3.72493e-05	3.92719
tetur08g03980	LY6_UPAR protein	-0.655865	11.8794	-8.47416	2.5376e-07	4.22246e-06	6.69081
tetur03g01000	arginyl-tRNA synthetase	-0.656878	10.7842	-6.76571	4.45019e-06	4.40721e-05	3.71942
tetur24g00690	BTB/POZ-like	-0.659193	7.74088	-6.33841	9.68296e-06	8.37069e-05	2.91539
tetur10g01270	Insulin-like	-0.659987	12.8762	-5.83797	2.48422e-05	0.000181361	1.94322
tetur33g01290	Glycoside hydrolase; subgroup; catalytic core	-0.660748	9.13981	-7.85345	6.87583e-07	9.47228e-06	5.65563
tetur02g08600	Hypothetical protein	-0.661133	11.2373	-6.55349	6.52688e-06	6.10401e-05	3.32315
tetur08g03480	Hypothetical protein	-0.661236	9.63888	-5.31716	6.86067e-05	0.000417569	0.898662
tetur19g00720	Ribosome biogenesis protein	-0.661582	10.7058	-7.74477	8.22826e-07	1.10322e-05	5.46925
tetur02g05980	FERM/acyl-CoA-binding protein; 3-helical bundle	-0.661882	12.3075	-6.78365	4.30964e-06	4.29854e-05	3.75264
tetur03g08650	Peptidase M14; carboxypeptidase A	-0.663038	9.84847	-6.23979	1.16273e-05	9.74931e-05	2.72636
tetur11g01560	Carboxyl/cholinesterase	-0.663352	11.0361	-3.05037	0.00760827	0.0210495	-3.84489
tetur11g00990	Hypothetical protein	-0.664338	10.5749	-9.87615	3.15948e-08	7.85309e-07	8.85561
tetur19g02420	Nose resistant-to-fluoxetine protein; N-terminal	-0.664558	9.31674	-7.46601	1.31335e-06	1.61209e-05	4.98409
tetur03g05730	PREDICTED: similar to kelch-like 12	-0.664592	8.42898	-4.29507	0.00055215	0.00234445	-1.22843
tetur10g04500	E3 ubiquitin-protein ligase NRDP1	-0.664842	10.6595	-6.03358	1.71196e-05	0.000132989	2.32706
tetur254g00010	phosphotyrosyl phosphatase activator	-0.666221	9.64244	-10.3062	1.7404e-08	4.85363e-07	9.47508
tetur25g00550	HAD-superfamily hydrolase, subfamily IIID	-0.666643	11.5509	-7.58745	1.06995e-06	1.36375e-05	5.19672
tetur02g08380	Leucine-rich repeat domain, L domain-like	-0.668169	10.8665	-8.9312	1.2553e-07	2.43448e-06	7.4221
tetur12g00890	Hypothetical protein	-0.668474	9.94611	-6.90611	3.46586e-06	3.5772e-05	3.97826
tetur02g11310	Hypothetical protein	-0.669065	11.6051	-6.01453	1.77478e-05	0.00013703	2.28988
tetur38g00500	Hypothetical protein	-0.669173	8.91326	-7.38841	1.49865e-06	1.79529e-05	4.84719
tetur21g01120	Glycoside hydrolase, family 22	-0.669316	8.87876	-5.36191	6.27874e-05	0.000387908	0.989625
tetur21g00180	Choline/ethanolamine kinase; pseudogene ?	-0.669408	12.588	-3.83656	0.00144759	0.00520822	-2.19999
tetur17g02780	Hypothetical protein	-0.669479	7.26918	-7.31564	1.69734e-06	1.98554e-05	4.71809
tetur11g04970	WD40/YVTN repeat-like-containing domain	-0.669765	14.8591	-7.04794	2.69975e-06	2.92051e-05	4.23703
tetur03g06660	calcium release-activated calcium channel protein 1	-0.669803	9.12752	-5.38974	5.94275e-05	0.000371595	1.04609
tetur04g00930	SFRS17A-related protein	-0.671265	10.8135	-7.54055	1.15782e-06	1.46218e-05	5.11483
tetur31g00720	3-Pan module Cell Surface Protein; antigen-2	-0.671284	9.75699	-4.04375	0.000935209	0.0036338	-1.76076
tetur09g00080	PREDICTED: hypothetical protein	-0.671956	8.50426	-5.06388	0.000113831	0.000633316	0.379783
tetur32g00640	CG12123-RA protein	-0.67212	9.99896	-6.36292	9.25444e-06	8.07054e-05	2.96216
tetur10g00270	Transcription factor ortholog to vertebrate FoxP genes	-0.672933	10.5454	-6.92038	3.37943e-06	3.50616e-05	4.00442
tetur02g09770	Orfan gene family; member-16	-0.673993	7.09194	-2.8409	0.0117695	0.0302181	-4.26907
tetur01g06140	Hypothetical protein	-0.674622	11.3122	-5.62614	3.73927e-05	0.000253109	1.52222
tetur01g08130	Leucine-rich repeat domain, L domain-like	-0.674691	9.21932	-8.01683	5.26426e-07	7.5287e-06	5.93291
tetur02g00500	exportin 5	-0.675041	8.91315	-5.95665	1.98069e-05	0.000150429	2.17668
tetur04g01500	snurportin-1	-0.676201	10.3398	-9.065	1.0263e-07	2.05458e-06	7.63139
tetur01g02880	Hypothetical protein	-0.676206	8.94934	-6.12562	1.43942e-05	0.000115088	2.50597
tetur02g05180	isoleucyl-tRNA synthetase	-0.67635	9.28809	-6.29352	1.05223e-05	8.96843e-05	2.8295
tetur07g04270	Protein of unknown function DUF726	-0.676738	10.0751	-8.6621	1.89414e-07	3.35603e-06	6.99464
tetur72g00010	PREDICTED: similar to Glucosylceramidase precursor	-0.676861	6.90328	-6.51224	7.03636e-06	6.4848e-05	3.24541
tetur25g01960	endonuclease III	-0.678387	11.2513	-6.88182	3.61835e-06	3.70988e-05	3.93367
tetur09g02720	carnitine O-palmitoyltransferase 2; mitochondrial precursor	-0.679192	11.2194	-11.9497	2.09715e-09	8.21421e-08	11.6711
tetur10g03590	Hypothetical protein	-0.679255	7.70898	-7.37286	1.53895e-06	1.82787e-05	4.81967
tetur05g05270	Glutathione S-transferase; class mu	-0.679421	9.09147	-4.16947	0.000718143	0.00291862	-1.49429
tetur08g05310	Cathepsin B	-0.679436	14.2289	-3.95639	0.00112412	0.00424215	-1.94599
tetur37g00760	PREDICTED: similar to annulin	-0.679541	7.9834	-10.5381	1.27168e-08	3.68655e-07	9.80096
tetur16g01180	Hypothetical protein	-0.679699	8.81792	-2.9988	0.00847449	0.0230258	-3.95012
tetur30g01820	Hypothetical protein	-0.679925	10.8619	-5.42941	5.49546e-05	0.000347838	1.12644
tetur19g00460	pyrazinamidase/nicotinamidase	-0.680277	9.56226	-6.30001	1.03963e-05	8.88274e-05	2.84195
tetur05g01430	alpha/beta hydrolase fold protein	-0.680649	13.1391	-6.34738	9.52381e-06	8.25358e-05	2.93251
tetur24g02300	Hypothetical protein	-0.68078	7.09306	-8.37374	2.97197e-07	4.79643e-06	6.52667
tetur17g02290	Hypothetical protein	-0.680847	9.49556	-6.9715	3.08777e-06	3.2446e-05	4.0979
tetur08g06030	Legumain	-0.681113	13.2079	-4.06194	0.000900096	0.00353249	-1.72219
tetur30g01440	Serine protease	-0.681355	14.2053	-5.50284	4.75709e-05	0.000308381	1.27468
tetur15g00270	Beta;beta-carotene 9';10'-oxygenase; CMO-II	-0.681811	6.75806	-7.02122	2.82926e-06	3.02308e-05	4.18848
tetur02g03310	PREDICTED: zinc finger protein 474-like	-0.68251	11.1983	-5.38283	6.02435e-05	0.000376023	1.03208
tetur16g01390	Ankyrin repeat domain-containing protein 13	-0.682875	7.41366	-10.5965	1.17605e-08	3.45966e-07	9.88215
tetur08g07380	regucalcin	-0.682953	12.3973	-6.37722	9.01354e-06	7.89974e-05	2.98942
tetur08g04570	Hypothetical protein	-0.6834	7.543	-7.03657	2.75407e-06	2.95406e-05	4.21639
tetur08g06780	Hypothetical protein	-0.683419	7.35057	-3.12717	0.00647666	0.0183148	-3.68728
tetur13g03310	Zinc finger, PHD-type, conserved site	-0.683564	9.63943	-6.77788	4.35439e-06	4.33388e-05	3.74195
tetur14g04030	PREDICTED: im:6906516	-0.683646	7.17417	-6.14813	1.37991e-05	0.000111416	2.54955
tetur05g00760	Mitochondrial fission 1 protein	-0.6846	10.9127	-7.35351	1.59072e-06	1.88453e-05	4.78536
tetur03g08890	Jiraiya	-0.685299	7.201	-6.35509	9.38906e-06	8.14693e-05	2.94724
tetur01g04560	DNA primase large subunit	-0.685462	9.94454	-4.92877	0.000149585	0.000799866	0.10043
tetur09g06500	Hypothetical protein	-0.685521	10.5666	-8.15993	4.17786e-07	6.24395e-06	6.17293
tetur02g00630	suppressor of SWI4 1 homolog	-0.6858	11.699	-8.02281	5.21339e-07	7.47896e-06	5.94299
tetur21g01800	Hypothetical protein	-0.685847	7.66365	-5.59255	3.99196e-05	0.000266589	1.45496
tetur09g01750	procollagen-proline; 2-oxoglutarate 4-dioxygenase	-0.685952	12.7204	-4.50355	0.00035785	0.00165055	-0.788496
tetur17g01500	Staphylococcal nuclease (SNase-like), OB-fold	-0.687189	12.342	-10.6853	1.04487e-08	3.13328e-07	10.005
tetur29g01410	sorting nexin-24	-0.687341	9.22117	-9.01085	1.11318e-07	2.20799e-06	7.54695
tetur06g02510	Hypothetical protein	-0.688779	10.6007	-3.78801	0.001604	0.00566662	-2.30284
tetur01g10680	Hypothetical protein	-0.68881	8.943	-7.41406	1.43455e-06	1.7334e-05	4.89253
tetur02g09190	Hypothetical protein	-0.690343	9.06049	-6.92744	3.3375e-06	3.46916e-05	4.01735
tetur14g02870	elongation of very long chain fatty acids protein 6	-0.690375	13.763	-3.91063	0.00123802	0.00458107	-2.04301
tetur29g01160	Conserved three-pass transmembrane protein 177	-0.690658	11.0343	-8.23635	3.69661e-07	5.6798e-06	6.30004
tetur31g01040	Immunodominant surface protein, Ehrlichia tandem repeat-containing	-0.69102	15.9386	-3.84992	0.0014073	0.00509169	-2.17168
tetur33g01450	3-Pan modules Cell Surface Protein; Antigen-B homolog	-0.691281	10.1922	-4.70806	0.00023471	0.00116139	-0.359307
tetur09g03280	Nkrf protein; putative	-0.691569	11.9687	-5.83364	2.50493e-05	0.000182586	1.93467
tetur14g03010	Pepsin	-0.692234	16.1261	-5.98	1.89479e-05	0.000144614	2.2224
tetur82g00030	Leucine-rich repeat domain, L domain-like	-0.693166	7.55345	-4.70127	0.000238007	0.00117437	-0.373521
tetur08g07930	Cytochrome P450 pseudogene	-0.69333	9.82433	-2.55606	0.0211004	0.0494327	-4.82902
tetur10g01720	major ampullate spidroin 1	-0.693911	7.2837	-4.91314	0.000154409	0.000820221	0.0679967
tetur05g09335	Chemosensory Receptor; Gustatory receptor family	-0.694109	7.53782	-11.0445	6.5253e-09	2.11111e-07	10.4937
tetur06g03140	Hypothetical protein	-0.694743	7.11625	-9.8126	3.45611e-08	8.43992e-07	8.76238
tetur05g01800	PREDICTED: similar to UBX domain protein 4	-0.695517	9.14966	-5.62585	3.74144e-05	0.000253133	1.52163
tetur419g00010	C2H2 domain containing protein	-0.696237	7.01252	-6.98028	3.04039e-06	3.20493e-05	4.11392
tetur17g01710	Coiled-coil domain containing protein 32	-0.696329	10.2018	-9.0627	1.02985e-07	2.05458e-06	7.62781
tetur04g01250	hypothetical protein IscW_ISCW013795	-0.696415	10.3111	-8.60435	2.0713e-07	3.62387e-06	6.90174
tetur40g00392	Trypsin Inhibitor-like, cysteine rich domain	-0.697467	12.1776	-4.15098	0.000746552	0.00300517	-1.53347
tetur06g05910	H/ACA ribonucleoprotein complex subunit 4	-0.698763	13.3986	-6.15144	1.37137e-05	0.000110854	2.55596
tetur16g04149	hypothetical protein	-0.698933	11.6793	-3.48736	0.00302986	0.00969665	-2.93738
tetur05g07100	chromosome 7 open reading frame 23	-0.700473	11.0927	-6.61365	5.85176e-06	5.54327e-05	3.43609
tetur02g03880	retinol dehydrogenase 13	-0.700539	9.89113	-6.93399	3.29912e-06	3.43694e-05	4.02933
tetur10g04530	STAT transcription factor; coiled coil	-0.702559	11.1476	-8.69167	1.80965e-07	3.23926e-06	7.04205
tetur09g04130	BUD13 component of the pre-mRNA RES complex.	-0.702673	10.643	-8.3777	2.95343e-07	4.78311e-06	6.53317
tetur01g15190	Protein of unknown function DUF92, TMEM19	-0.702763	10.2341	-7.27761	1.81194e-06	2.09082e-05	4.65034
tetur01g07250	Pancreatic lipase	-0.703453	7.02722	-6.78384	4.30823e-06	4.29854e-05	3.75298
tetur14g01360	ferritin	-0.703653	13.5946	-2.85839	0.0113506	0.0293197	-4.234
tetur05g01420	Hypothetical protein	-0.703864	7.20751	-8.84498	1.43083e-07	2.70712e-06	7.2861
tetur28g00150	Zinc finger, DHHC-type, palmitoyltransferase	-0.703925	9.54868	-9.26067	7.67289e-08	1.64855e-06	7.93363
tetur11g01230	UDP-glucuronosyl/UDP-glucosyltransferase	-0.703955	8.20159	-3.9629	0.00110879	0.00418998	-1.93218
tetur01g08800	catsup protein	-0.704114	7.50056	-10.5532	1.24623e-08	3.63545e-07	9.82196
tetur39g00490	Programmed cell death protein 6	-0.705104	11.1055	-7.81363	7.34211e-07	9.99271e-06	5.58752
tetur26g02670	Hypothetical protein	-0.705527	8.20533	-8.23501	3.70457e-07	5.6798e-06	6.2978
tetur07g03400	Hypothetical protein	-0.705806	9.46084	-4.10416	0.000823652	0.00327115	-1.63268
tetur22g02300	Glutathione S-transferase; class kappa	-0.706338	12.2898	-7.51308	1.21277e-06	1.51207e-05	5.06673
tetur01g01400	Chemosensory Receptor; Gustatory receptor family	-0.707916	7.48754	-9.97216	2.76116e-08	7.01305e-07	8.99562
tetur26g00520	Hypothetical protein	-0.708692	7.81545	-6.03929	1.6936e-05	0.000131637	2.33818
tetur13g00320	DPH3 homolog	-0.709398	9.97988	-10.0722	2.40202e-08	6.21406e-07	9.14038
tetur18g03420	Hypothetical protein	-0.711317	8.51009	-5.81843	2.57906e-05	0.000186915	1.90462
tetur21g00870	Hypothetical protein	-0.711584	7.48018	-6.32517	9.92305e-06	8.53064e-05	2.89008
tetur10g02140	Leucine-rich repeat domain, L domain-like	-0.712383	11.2968	-7.55114	1.13735e-06	1.43783e-05	5.13334
tetur02g01500	Hypothetical protein	-0.712869	7.13956	-6.78611	4.29074e-06	4.2868e-05	3.75719
tetur20g03110	Glycine-rich secreted protein	-0.713888	9.20765	-3.84514	0.0014216	0.00513277	-2.18182
tetur10g00980	Phox-like	-0.714374	12.0739	-8.43157	2.71307e-07	4.46648e-06	6.62135
tetur32g00910	PHD finger protein 10	-0.714597	11.6969	-7.94872	5.88184e-07	8.26778e-06	5.81773
tetur31g01740	Hypothetical protein	-0.7151	8.28814	-7.51303	1.21286e-06	1.51207e-05	5.06665
tetur03g06440	NICE-3	-0.715789	9.41979	-7.63684	9.84937e-07	1.27439e-05	5.28263
tetur02g14390	Hypothetical protein	-0.715801	11.1073	-4.13506	0.000771912	0.00309386	-1.5672
tetur22g02120	Lipase/lipooxygenase; PLAT/LH2	-0.716909	12.4202	-2.61953	0.018548	0.0444847	-4.70621
tetur10g02800	S-formylglutathione hydrolase	-0.717456	10.4667	-4.22656	0.000637184	0.00263412	-1.37339
tetur01g05490	Hypothetical protein	-0.717777	8.32199	-7.07712	2.56535e-06	2.80339e-05	4.28994
tetur03g09280	Hypothetical protein	-0.719333	7.42998	-8.83085	1.46198e-07	2.75484e-06	7.26372
tetur285g00010	MRG-binding protein	-0.719633	9.52027	-9.25151	7.77727e-08	1.66584e-06	7.91959
tetur09g02150	WD40/YVTN repeat-like-containing domain	-0.72111	11.7011	-8.44145	2.67123e-07	4.40801e-06	6.63749
tetur07g02990	MDL1	-0.72137	7.75309	-4.28228	0.000567103	0.00239219	-1.25549
tetur21g02960	Hypothetical protein	-0.721516	8.56215	-3.54614	0.00267551	0.00870719	-2.81373
tetur04g04310	Hypothetical protein	-0.721527	7.93772	-11.183	5.45918e-09	1.81677e-07	10.6788
tetur02g03270	Hypothetical protein	-0.721989	13.8751	-4.65442	0.000262068	0.0012776	-0.471621
tetur04g00920	Transport and Golgi organisation protein 2	-0.722474	11.072	-6.4294	8.18842e-06	7.33329e-05	3.08865
tetur10g00060	Dynactin subunit 2	-0.72256	11.8747	-13.0524	5.76044e-10	2.74142e-08	13.009
tetur11g03170	Glu & Asp rich protein; possibly of endosymbiont origin	-0.72273	11.5011	-11.849	2.37119e-09	9.07552e-08	11.5438
tetur05g08620	phosphatidylinositol N-acetylglucosaminyltransferase subunit C	-0.722794	10.5773	-8.49286	2.46432e-07	4.1202e-06	6.72124
tetur05g08750	Hypothetical protein	-0.723016	9.79912	-8.50988	2.3996e-07	4.0362e-06	6.74889
tetur08g05130	protein BAT5	-0.723027	9.9637	-7.1935	2.09512e-06	2.36553e-05	4.4998
tetur09g00570	Cathepsin B	-0.723243	9.71749	-6.05991	1.62894e-05	0.000127606	2.37834
tetur26g02370	lipopolysaccharide-induced tumor necrosis factor-alpha factor homolog	-0.723698	8.87022	-5.7211	3.11072e-05	0.00021775	1.71161
tetur19g01000	Molybdenum cofactor sulfurase, C-terminal	-0.724116	12.2773	-6.63801	5.59942e-06	5.33322e-05	3.48169
tetur10g03070	Hypothetical protein	-0.72586	7.6621	-8.32212	3.225e-07	5.11015e-06	6.44179
tetur02g00130	isoamyl acetate-hydrolyzing esterase 1	-0.726047	11.9068	-6.98366	3.02237e-06	3.19272e-05	4.12008
tetur18g00400	Hypothetical protein	-0.727946	8.66972	-9.5564	4.984e-08	1.1615e-06	8.38198
tetur02g08070	Hypothetical protein	-0.728125	7.51421	-5.26342	7.63388e-05	0.000455095	0.789115
tetur03g06160	acid phosphatase-1	-0.728191	10.8641	-7.42671	1.40399e-06	1.69941e-05	4.91486
tetur11g02640	Wannes-Thomas Secreted Protein 13	-0.728216	8.37134	-5.87482	2.31505e-05	0.000171034	2.01589
tetur26g02220	Hypothetical protein	-0.728916	7.33457	-10.728	9.87382e-09	2.99958e-07	10.0637
tetur15g02520	Hypothetical protein	-0.728933	7.67455	-8.12388	4.42727e-07	6.54653e-06	6.11272
tetur01g00850	Mesoderm induction early response protein	-0.729228	9.69286	-8.54288	2.27912e-07	3.88985e-06	6.80241
tetur21g02390	titin	-0.729819	7.0732	-7.16547	2.19947e-06	2.46773e-05	4.44941
tetur112g00010	Mid1-interacting protein 1	-0.730791	14.5905	-4.13364	0.000774222	0.00310134	-1.57022
tetur07g06710	PREDICTED: sodium-dependent glucose transporter 1-like; partial	-0.731591	10.9484	-4.42039	0.000425258	0.00190241	-0.96374
tetur34g01253	Leucine-rich repeat domain, L domain-like	-0.731755	8.51899	-6.37271	9.08874e-06	7.94566e-05	2.98083
tetur17g03830	Hypothetical protein	-0.731972	8.74154	-7.01219	2.87445e-06	3.05731e-05	4.17207
tetur02g03930	variable lymphocyte receptor A	-0.732482	12.7201	-6.12118	1.45149e-05	0.000115919	2.49736
tetur10g03060	Hypothetical protein	-0.733623	8.37425	-6.76165	4.4827e-06	4.42996e-05	3.71189
tetur01g10820	Carboxyl/cholinesterase	-0.73517	8.36995	-4.83596	0.000180671	0.00093341	-0.0924131
tetur08g07680	Hypothetical protein	-0.735414	10.029	-4.85594	0.000173461	0.000902179	-0.0508387
tetur01g10180	Ganglioside GM2 activator	-0.73544	13.3624	-4.39331	0.000449898	0.00198587	-1.02088
tetur14g03290	zinc finger protein 287	-0.736245	7.85711	-4.59288	0.000297501	0.00142018	-0.600704
tetur02g04310	Glycoside hydrolase; catalytic core	-0.73689	14.8288	-4.90372	0.000157391	0.000832888	0.0484545
tetur02g10030	Galactose-binding domain-like	-0.737084	8.7339	-7.88401	6.53907e-07	9.09988e-06	5.70776
tetur01g11420	Hypothetical protein	-0.737133	8.30828	-7.09027	2.50713e-06	2.75271e-05	4.31373
tetur24g02350	S-methyl-5'-thioadenosine phosphorylase	-0.737192	6.59801	-5.12451	0.000100768	0.000571184	0.504574
tetur10g00730	PREDICTED: similar to AGAP003501-PA	-0.737267	12.9906	-4.21825	0.000648374	0.00267167	-1.39099
tetur15g01050	adenylate cyclase	-0.739422	9.94896	-4.89557	0.000160023	0.000842975	0.031515
tetur03g10167	Ubiquinone biosynthesis protein Coq4	-0.73943	10.0992	-9.3017	7.22288e-08	1.56634e-06	7.99644
tetur07g02770	60S ribosomal protein L17	-0.74121	15.3909	-11.0402	6.56208e-09	2.11809e-07	10.4879
tetur16g01430	Ankyrin repeat domain-containing protein 13	-0.741307	10.4449	-6.07854	1.57271e-05	0.000123968	2.41458
tetur21g00540	RAB5-interacting protein	-0.743113	9.3393	-6.77615	4.36789e-06	4.34421e-05	3.73875
tetur01g10800	Carboxyl/cholinesterase	-0.743996	10.4794	-4.17879	0.00070425	0.00287389	-1.47455
tetur17g01720	Hypothetical protein	-0.744782	10.5568	-4.59456	0.000296469	0.00141623	-0.597169
tetur07g05770	Scramblase	-0.745373	7.24566	-6.11294	1.47414e-05	0.000117527	2.48137
tetur30g00770	Domain of unknown function DUF3421	-0.745669	11.7008	-6.50427	7.13943e-06	6.5496e-05	3.23038
tetur02g12880	hypothetical protein	-0.747332	7.21069	-8.77149	1.60081e-07	2.96043e-06	7.16946
tetur20g03150	leucine carboxyl methyltransferase 1	-0.747642	11.5656	-8.53134	2.32052e-07	3.92686e-06	6.78371
tetur33g01710	Hypothetical protein	-0.747906	6.97301	-4.48251	0.000373799	0.00170781	-0.832795
tetur01g06570	sodium-dependent glucose transporter 1	-0.748908	9.32624	-3.16756	0.00594973	0.0170636	-3.60402
tetur16g00310	Hypothetical protein	-0.749561	10.5788	-4.37428	0.000468074	0.00204795	-1.06105
tetur17g00240	Hypothetical protein	-0.750563	8.62685	-7.57313	1.09602e-06	1.39315e-05	5.17175
tetur08g06150	solute carrier family 23 member 2	-0.751101	10.3527	-6.98974	2.99022e-06	3.16355e-05	4.13116
tetur32g00970	Conserved hypothetical protein CHP02464	-0.751815	12.5972	-7.19571	2.08713e-06	2.35842e-05	4.50376
tetur13g03800	FAD-dependent pyridine nucleotide-disulphide oxidoreductase	-0.7534	13.0642	-8.50261	2.42701e-07	4.06269e-06	6.73709
tetur08g05610	Median body protein	-0.757138	10.4859	-7.3886	1.49817e-06	1.79529e-05	4.84752
tetur10g05290	Carboxyl/cholinesterase	-0.757245	11.5945	-8.38643	2.913e-07	4.74519e-06	6.54749
tetur08g00640	MICOS complex subunit Mic13	-0.757425	12.4692	-12.46	1.13986e-09	4.95148e-08	12.3027
tetur20g00720	Hypothetical protein	-0.757882	8.29675	-3.76166	0.00169587	0.00594451	-2.35862
tetur15g00130	Hypothetical protein	-0.759062	8.55237	-12.5831	9.86952e-10	4.35508e-08	12.4518
tetur12g01170	exosomal core protein CSL4 homolog; 3-5 exonuclease	-0.759588	10.0828	-12.5491	1.02686e-09	4.50268e-08	12.4108
tetur13g00410	Loquacious-2; homolog of Loquacious (Drosophila melanogaster)	-0.75966	13.6758	-9.7994	3.52128e-08	8.56906e-07	8.74297
tetur13g01950	Caffeine-induced death protein 2	-0.763661	11.3159	-9.55468	4.99641e-08	1.1615e-06	8.3794
tetur30g00700	Apple-like	-0.763961	10.3684	-8.7405	1.67871e-07	3.07191e-06	7.12009
tetur10g01500	Hypothetical protein	-0.764011	8.55854	-8.36972	2.99092e-07	4.80477e-06	6.52006
tetur05g03460	carboxypeptidase D	-0.765059	9.37777	-4.90939	0.00015559	0.000825866	0.0602107
tetur30g00550	fatty acid ELOngation family member	-0.766918	9.77837	-5.65187	3.55698e-05	0.000243249	1.57364
tetur02g05190	histone deacetylase 6 isoform B	-0.767128	9.65322	-10.9542	7.33648e-09	2.33029e-07	10.3721
tetur13g01940	leucine-rich repeat-containing protein	-0.767772	9.60763	-8.53227	2.31713e-07	3.92588e-06	6.78523
tetur02g11420	Cathepsin B	-0.769151	13.7968	-2.64305	0.0176796	0.0427253	-4.6604
tetur22g00410	replication protein A 70 kDa DNA-binding subunit	-0.771206	6.65	-5.78782	2.73528e-05	0.000196399	1.84405
tetur08g02660	Hypothetical protein	-0.771288	15.2173	-4.19125	0.000686093	0.00280718	-1.44815
tetur04g09180	Kinetochore protein Nuf2	-0.772208	10.3	-6.37435	9.06133e-06	7.93664e-05	2.98395
tetur09g02830	Hypothetical protein	-0.774197	6.96254	-9.95929	2.81135e-08	7.09143e-07	8.97691
tetur16g00830	Hypothetical protein	-0.774902	9.46322	-7.68661	9.06377e-07	1.18826e-05	5.36888
tetur16g00440	Hypothetical protein	-0.775666	7.53725	-9.84889	3.28328e-08	8.05406e-07	8.81568
tetur16g01440	inorganic pyrophosphatase	-0.775678	12.6068	-11.8467	2.37769e-09	9.07552e-08	11.5409
tetur34g00560	solute carrier family 25	-0.778777	10.3662	-6.30211	1.0356e-05	8.85914e-05	2.84596
tetur04g08280	Hypothetical protein	-0.779122	8.23199	-6.6103	5.88734e-06	5.57319e-05	3.42982
tetur25g01940	60S ribosomal protein L27	-0.780559	15.3562	-9.07468	1.01153e-07	2.04122e-06	7.64645
tetur07g00710	Leucine-rich repeat domain, L domain-like	-0.781946	7.78535	-9.24686	7.83096e-08	1.6722e-06	7.91244
tetur56g00010	BTB/Kelch-associated	-0.782256	6.8486	-2.90796	0.0102406	0.0268716	-4.13425
tetur01g12880	transmembrane protein 5	-0.78286	8.275	-8.58258	2.14252e-07	3.70661e-06	6.86662
tetur03g05200	adipocyte plasma membrane-associated protein	-0.78287	12.2487	-6.85777	3.77628e-06	3.83793e-05	3.88943
tetur18g02050	GE13940	-0.783421	10.2412	-7.67743	9.20356e-07	1.19939e-05	5.353
tetur06g01860	PREDICTED: similar to mKIAA0952 protein	-0.783508	8.25846	-7.73644	8.34275e-07	1.11535e-05	5.45491
tetur06g91359	hypothetical protein	-0.783598	8.32049	-8.23072	3.73004e-07	5.69983e-06	6.29068
tetur02g11960	apolipoprotein D; putative	-0.784845	13.8597	-3.82608	0.00148001	0.00529568	-2.22221
tetur14g00150	Proteinase/amylase inhibitor domain	-0.785073	8.21765	-5.89296	2.23618e-05	0.000166923	2.05162
tetur06g03180	AP-1 complex subunit sigma-2	-0.785419	10.7687	-8.03569	5.10557e-07	7.34697e-06	5.96469
tetur11g06300	Hypothetical protein	-0.785788	7.67642	-7.27164	1.83066e-06	2.10443e-05	4.63968
tetur19g00440	UDP-glycosyltransferase; teturUGT57	-0.786091	8.12367	-6.51056	7.05796e-06	6.50041e-05	3.24224
tetur04g03720	krueppel-like factor 2	-0.787383	8.41128	-5.03755	0.000120037	0.000662363	0.325462
tetur02g11830	Hypothetical protein	-0.788056	7.58705	-5.78625	2.74359e-05	0.000196619	1.84092
tetur01g91152	hypothetical protein	-0.789628	8.3971	-6.75634	4.52551e-06	4.46278e-05	3.70205
tetur02g00340	Hypothetical protein	-0.789662	9.33426	-8.67824	1.84754e-07	3.29438e-06	7.02052
tetur36g00510	palmitoyl-protein thioesterase 1	-0.790776	13.2021	-6.84914	3.83467e-06	3.88878e-05	3.87354
tetur16g00950	Endoglin/CD105 antigen	-0.79151	8.42738	-7.46337	1.31923e-06	1.61229e-05	4.97945
tetur161g00030	Deoxyuridine triphosphate nucleotidohydrolase/Deoxycytidine triphosphate deaminase	-0.791579	6.86664	-5.41984	5.60012e-05	0.000353499	1.10707
tetur02g11530	Aldo-keto reductase family D; member 2	-0.792407	11.9388	-4.7561	0.0002127	0.00106956	-0.258923
tetur36g00500	PREDICTED: similar to mitochondrial ribosomal protein; L9; putative	-0.792577	10.5195	-10.6747	1.05977e-08	3.14414e-07	9.99025
tetur36g00350	Hypothetical protein	-0.79262	7.95295	-8.56419	2.20468e-07	3.77203e-06	6.83691
tetur12g00900	P-loop containing nucleoside triphosphate hydrolase	-0.797377	8.69684	-9.71819	3.95205e-08	9.42006e-07	8.62305
tetur06g05370	Hypothetical protein	-0.797897	9.67976	-10.2338	1.92165e-08	5.19291e-07	9.37217
tetur36g00460	glucosamine-6-phosphate isomerase	-0.79869	11.3161	-12.3735	1.26212e-09	5.34922e-08	12.1972
tetur26g02450	pre-mRNA-splicing factor SLU7	-0.79881	8.63582	-8.40087	2.84743e-07	4.66016e-06	6.57113
tetur33g01560	Hypothetical protein	-0.799515	8.06095	-8.22043	3.79187e-07	5.77225e-06	6.27361
tetur06g03020	Lipocalin family conserved site	-0.800949	10.6242	-4.01178	0.0010003	0.00384353	-1.82854
tetur19g00880	PLC-like phosphodiesterase, TIM beta/alpha-barrel domain	-0.801018	10.8206	-5.78658	2.74184e-05	0.000196619	1.84158
tetur01g11550	Hypothetical protein	-0.801291	8.62354	-7.07955	2.55451e-06	2.79374e-05	4.29433
tetur16g02300	UDP-glucuronosyl/UDP-glucosyltransferase	-0.802565	11.8005	-6.46418	7.6826e-06	6.96246e-05	3.15456
tetur20g00700	Hypothetical protein	-0.803218	7.46494	-3.65633	0.00211911	0.00715989	-2.58135
tetur33g01330	Potential Queuosine, Q, salvage protein family	-0.803343	12.3317	-8.39257	2.88492e-07	4.71045e-06	6.55755
tetur05g92690	hypothetical protein	-0.803386	10.418	-6.21796	1.21099e-05	0.000100572	2.68436
tetur15g03650	Hypothetical protein	-0.804317	6.93772	-4.42868	0.000417989	0.00187615	-0.946244
tetur19g00810	Hypothetical protein	-0.804386	8.52213	-11.8059	2.49988e-09	9.3705e-08	11.489
tetur07g01720	Leucine Rich Repeat G-protein coupled receptor	-0.804532	10.3347	-9.18855	8.53689e-08	1.77669e-06	7.82275
tetur22g02590	PREDICTED: rCG19957-like	-0.805305	8.57642	-4.84344	0.000177937	0.000921676	-0.0768474
tetur02g13950	Hypothetical protein	-0.805341	8.85613	-2.7624	0.0138413	0.0347128	-4.42555
tetur16g03520	Apple-like	-0.805428	6.86896	-4.89011	0.000161806	0.000849482	0.0201928
tetur11g04510	Hypothetical protein	-0.805836	9.89558	-10.5699	1.21862e-08	3.56985e-07	9.84522
tetur28g00470	G protein alpha subunit; helical insertion	-0.806231	12.7419	-6.31313	1.01466e-05	8.70137e-05	2.86706
tetur02g02090	Hypothetical protein	-0.808759	13.2089	-3.58251	0.00247734	0.00814718	-2.73711
tetur24g01700	H/ACA ribonucleoprotein complex, subunit Gar1/Naf1	-0.808941	9.96314	-7.48928	1.26256e-06	1.56213e-05	5.02499
tetur19g00900	Alpha/beta hydrolase fold-5	-0.809952	10.3277	-8.86534	1.38717e-07	2.63561e-06	7.3183
tetur21g00070	UDP-N-acetylglucosamine transferase subunit ALG14 homolog	-0.811453	9.72605	-7.8985	6.38555e-07	8.91292e-06	5.73243
tetur37g01180	Hypothetical protein	-0.811792	6.94747	-4.35727	0.000484957	0.00210799	-1.09697
tetur07g01810	Hypothetical protein	-0.812558	8.98499	-6.81193	4.09743e-06	4.12524e-05	3.80492
tetur26g00430	Six-bladed beta-propeller; TolB-like	-0.812752	11.7254	-3.28343	0.00466147	0.0139394	-3.36386
tetur24g01940	Hypothetical protein	-0.812985	7.06774	-9.22571	8.07953e-08	1.70183e-06	7.87997
tetur11g06368	hypothetical protein	-0.813366	9.64805	-3.58468	0.00246603	0.00812147	-2.73255
tetur18g01090	Winged helix-turn-helix DNA-binding domain	-0.814212	8.08445	-8.66878	1.87471e-07	3.33856e-06	7.00535
tetur28g00120	Diphosphomevalonate decarboxylase	-0.816009	10.8469	-8.27547	3.4731e-07	5.40823e-06	6.36481
tetur11g01000	Meiosis arrest female protein 1	-0.816438	9.87853	-6.39749	8.68324e-06	7.67781e-05	3.028
tetur15g00280	L-galactose dehydrogenase	-0.816896	11.6727	-4.80495	0.000192477	0.000985181	-0.157015
tetur11g00510	1;2-dihydroxy-3-keto-5-methylthiopentene dioxygenase	-0.818724	13.4967	-11.0656	6.34961e-09	2.06385e-07	10.522
tetur243g00010	Hypothetical protein	-0.819112	9.8553	-5.87713	2.30487e-05	0.000170772	2.02044
tetur04g04280	cathepsin A	-0.819204	12.8964	-8.6991	1.78907e-07	3.22066e-06	7.05393
tetur05g01440	Hypothetical protein	-0.820569	8.06851	-4.8248	0.000184834	0.000951392	-0.115665
tetur35g00780	Hypothetical protein	-0.821542	8.07004	-7.5911	1.06342e-06	1.35666e-05	5.20308
tetur02g03210	mRNA splicing factor, Cwf18	-0.821669	10.3078	-12.637	9.26976e-10	4.11648e-08	12.5167
tetur01g05730	Apolipoprotein D precursor	-0.822292	12.2787	-3.50593	0.00291311	0.00938114	-2.89834
tetur09g03550	Hypothetical Cell Surface Protein	-0.822833	6.34295	-5.48405	4.93564e-05	0.000317852	1.23682
tetur10g05140	D-isomer specific 2-hydroxyacid dehydrogenase family protein	-0.823187	12.1523	-8.09153	4.66443e-07	6.83202e-06	6.05853
tetur22g01530	lethal	-0.823501	9.9745	-3.27343	0.00476086	0.0142031	-3.38466
tetur16g02820	Hypothetical protein	-0.824335	7.21045	-10.8433	8.48145e-09	2.61649e-07	10.2215
tetur01g10370	Hypothetical protein	-0.825655	10.6921	-9.21555	8.20205e-08	1.71468e-06	7.86433
tetur01g13460	Cystatin domain	-0.826675	13.4672	-4.18762	0.000691342	0.00282286	-1.45586
tetur26g02210	Hypothetical protein	-0.829752	7.66152	-9.49368	5.4572e-08	1.2557e-06	8.28773
tetur05g01910	Homeobox, conserved site	-0.833274	10.8406	-9.04068	1.0644e-07	2.12028e-06	7.59351
tetur10g03560	Aromatic-ring hydroxylase-like	-0.833349	10.6208	-14.9091	7.94101e-11	5.7077e-09	15.0538
tetur10g01510	Hypothetical protein	-0.833386	7.22919	-13.4597	3.657e-10	1.92216e-08	13.4787
tetur31g00250	Carboxyl/cholinesterase	-0.833519	9.13864	-8.98927	1.14992e-07	2.26731e-06	7.5132
tetur10g04780	Protease inhibitor I4; serpin	-0.833796	8.74552	-6.35558	9.38065e-06	8.1447e-05	2.94816
tetur02g11330	Aldo/keto reductase/potassium channel subunit beta	-0.83432	10.8946	-5.86743	2.34799e-05	0.000172955	2.00134
tetur16g01330	target of EGR1; member 1	-0.834532	10.1329	-9.3166	7.06637e-08	1.54022e-06	8.0192
tetur04g07030	sorbitol dehydrogenase	-0.835423	10.723	-4.12159	0.000794047	0.00316801	-1.59574
tetur11g04920	Glycoside hydrolase; subgroup; catalytic core	-0.837285	15.1128	-4.15359	0.000742471	0.00299393	-1.52794
tetur12g00230	Hypothetical protein	-0.838865	10.2423	-4.78435	0.000200751	0.00102089	-0.199955
tetur43g00450	Hypothetical protein	-0.840131	10.8308	-5.72374	3.09488e-05	0.00021675	1.71687
tetur08g07630	cys-loop ligand-gated ion channel; nicotinic acetylcholine receptor subunit beta 3	-0.841815	8.65742	-8.84201	1.43732e-07	2.71571e-06	7.2814
tetur07g05900	phospholipid scramblase 2	-0.842814	9.72303	-4.32142	0.000522599	0.0022415	-1.17272
tetur01g04180	Mitochondrial substrate/solute carrier	-0.842984	9.5446	-8.6386	1.96422e-07	3.45822e-06	6.95689
tetur09g04630	Hypothetical protein	-0.843622	14.168	-7.66521	9.39326e-07	1.22296e-05	5.33183
tetur14g00870	conserved hypothetical protein	-0.84407	13.5579	-4.43405	0.000413353	0.00185989	-0.934924
tetur05g07300	Histone H3	-0.844872	15.7016	-8.35225	3.07466e-07	4.92793e-06	6.49138
tetur20g00570	Hypothetical protein	-0.845121	8.34096	-9.96755	2.77902e-08	7.03278e-07	8.98892
tetur01g16371	Carboxylesterase type B, conserved site	-0.845205	10.0007	-8.93343	1.25106e-07	2.42964e-06	7.42561
tetur01g11320	Polynucleotidyl transferase; ribonuclease H fold	-0.84573	13.4778	-7.79374	7.58736e-07	1.02816e-05	5.55342
tetur09g01990	ABC-transporter; class G	-0.848399	8.47597	-10.1126	2.27102e-08	5.97493e-07	9.19864
tetur24g00760	Hypothetical protein	-0.848862	7.43882	-4.50631	0.000355814	0.00164396	-0.7827
tetur33g00930	PREDICTED: similar to conserved hypothetical protein	-0.850358	12.7674	-6.52455	6.88012e-06	6.36883e-05	3.26863
tetur02g07400	Quinoprotein alcohol dehydrogenase-like domain	-0.850538	10.1369	-10.0242	2.56777e-08	6.58774e-07	9.07106
tetur07g00530	Protein kinase-like domain	-0.851017	11.9115	-8.21757	3.80923e-07	5.78604e-06	6.26887
tetur05g01230	Hypothetical protein	-0.851575	9.71035	-13.4294	3.78123e-10	1.96005e-08	13.4442
tetur14g00350	Hypothetical protein	-0.852515	8.11154	-9.13578	9.23347e-08	1.89619e-06	7.74124
tetur16g01670	zinc finger protein 713	-0.853182	9.80322	-14.1671	1.70664e-10	1.07681e-08	14.2654
tetur02g04800	Major facilitator superfamily; general substrate transporter	-0.854687	10.7846	-6.29576	1.04787e-05	8.94213e-05	2.8338
tetur07g02220	Leucine-rich repeat domain, L domain-like	-0.856041	8.43181	-6.45174	7.85965e-06	7.09352e-05	3.13101
tetur05g01930	carbonic anhydrase	-0.85946	9.36782	-7.5317	1.17524e-06	1.47636e-05	5.09934
tetur13g04220	beta-galactosidase	-0.860008	12.1135	-4.11157	0.000810938	0.00322709	-1.61698
tetur07g01910	alpha-glucosidase	-0.860917	12.8045	-8.75944	1.63064e-07	3.00365e-06	7.15028
tetur09g03940	viral A-type inclusion protein	-0.861013	11.9433	-4.98577	0.00013327	0.00072336	0.218491
tetur233g00040	Leucine-rich repeat domain, L domain-like	-0.8613	7.72549	-9.47279	5.62507e-08	1.28373e-06	8.25625
tetur31g00540	DNA cross-link repair 1A protein	-0.862219	8.81426	-8.29575	3.36289e-07	5.26879e-06	6.3983
tetur02g05080	cell differentiation protein rcd1	-0.862349	11.4986	-10.9289	7.58313e-09	2.39229e-07	10.3377
tetur05g08360	Hypothetical protein	-0.863675	7.39731	-10.3027	1.74888e-08	4.86754e-07	9.47003
tetur26g00610	vitellogenin receptor	-0.864085	10.3461	-6.49593	7.24906e-06	6.63696e-05	3.21462
tetur22g00710	thioredoxin	-0.864281	13.3554	-7.71682	8.61929e-07	1.14355e-05	5.42107
tetur04g02670	paired box pox neuro protein	-0.865453	9.51739	-9.65766	4.30894e-08	1.01493e-06	8.53322
tetur28g00350	Hypothetical protein	-0.865748	11.3702	-6.23944	1.16347e-05	9.74969e-05	2.7257
tetur12g03330	PREDICTED: similar to chromaffin granule amine transporter	-0.86635	12.9348	-8.06298	4.88478e-07	7.10254e-06	6.01059
tetur01g09940	Major facilitator superfamily; general substrate transporter	-0.869856	10.5527	-2.77412	0.0135111	0.0340499	-4.40228
tetur06g05710	Integrin alpha beta-propellor	-0.870902	12.26	-9.00339	1.12575e-07	2.22975e-06	7.53528
tetur11g02210	Oxysterol-binding protein	-0.871416	7.58677	-8.26612	3.52519e-07	5.44892e-06	6.34935
tetur02g92841	BTB/Kelch-associated	-0.871534	6.84703	-8.46002	2.59446e-07	4.30168e-06	6.66778
tetur01g05630	Glutamate racemase	-0.872263	7.56852	-14.5289	1.17033e-10	7.69771e-09	14.6544
tetur20g01120	PREDICTED: immunoglobulin-binding protein 1-like	-0.872786	12.268	-12.3602	1.28209e-09	5.4174e-08	12.1809
tetur03g09290	Hypothetical protein	-0.873158	7.35972	-5.50893	4.70067e-05	0.000305862	1.28694
tetur22g02130	Lipase/lipooxygenase; PLAT/LH2	-0.87385	10.2593	-4.99598	0.000130548	0.000710244	0.239595
tetur06g02020	Hypothetical protein	-0.874161	12.2158	-3.61662	0.00230484	0.0076825	-2.66517
tetur26g02822	hypothetical protein	-0.874507	6.95614	-12.4039	1.21766e-09	5.19235e-08	12.2343
tetur04g06120	Hypothetical protein	-0.8748	7.75246	-7.46038	1.32594e-06	1.619e-05	4.97418
tetur01g11060	Skb1 methyltransferase	-0.875445	12.0934	-4.09065	0.000847368	0.00335102	-1.66132
tetur21g91322	hypothetical protein	-0.876564	8.33442	-9.70853	4.00683e-08	9.53434e-07	8.60875
tetur17g03430	cathepsin A	-0.878002	10.948	-7.74312	8.25084e-07	1.10519e-05	5.46641
tetur04g02770	Carboxyl/cholinesterase	-0.879172	10.8506	-5.82938	2.52549e-05	0.000183605	1.92625
tetur12g04100	Phosphatidylinositol transfer protein-like; N-terminal	-0.87936	8.48882	-6.65536	5.42663e-06	5.19704e-05	3.51412
tetur30g01250	protein kinase	-0.880823	10.4078	-9.25547	7.73204e-08	1.6587e-06	7.92565
tetur01g13450	Hypothetical protein	-0.880917	7.155	-6.90968	3.44406e-06	3.56526e-05	3.98479
tetur17g03410	Domain of unknown function DUF3421	-0.884361	7.06706	-3.705	0.00191175	0.00655781	-2.47848
tetur13g01860	Platelet-derived growth factor (PDGF)	-0.884533	10.7609	-4.88613	0.000163122	0.000855425	0.0119188
tetur28g02590	PREDICTED: similar to RNA	-0.885379	11.2415	-12.6183	9.47374e-10	4.19371e-08	12.4942
tetur02g11740	UPF0139 membrane protein C19orf56 homolog	-0.885781	11.6674	-8.79892	1.53501e-07	2.86916e-06	7.21307
tetur30g01740	PREDICTED: hypothetical protein	-0.886657	11.1058	-3.42074	0.00348821	0.0108765	-3.07716
tetur08g04220	solute carrier family 27	-0.887091	9.88294	-8.42261	2.75156e-07	4.51385e-06	6.60671
tetur18g00730	nucleolar protein 12	-0.890418	11.0128	-8.67869	1.84624e-07	3.29438e-06	7.02125
tetur18g01360	Hypothetical protein	-0.891676	9.54585	-5.46025	5.1719e-05	0.000331268	1.18878
tetur26g02380	PREDICTED: iron/zinc purple acid phosphatase-like protein-like	-0.89214	13.6268	-4.55428	0.00032219	0.00151931	-0.681794
tetur09g03330	putative calcium-binding secreted protein	-0.893006	10.3826	-11.1598	5.6243e-09	1.85842e-07	10.6479
tetur13g02420	Zinc finger; RING-CH-type	-0.894179	10.2425	-9.32592	6.97035e-08	1.53091e-06	8.03342
tetur06g05130	Hypothetical protein	-0.894325	8.90358	-10.064	2.42945e-08	6.26177e-07	9.12859
tetur26g02150	sphingomyelin phosphodiesterase	-0.898151	13.4947	-8.70242	1.77993e-07	3.21494e-06	7.05925
tetur09g05240	Hypothetical protein	-0.898936	9.57623	-9.86084	3.22841e-08	7.96761e-07	8.83319
tetur31g01960	Hypothetical protein	-0.898945	10.3657	-4.56418	0.000315665	0.00149512	-0.660988
tetur02g10370	Double-stranded RNA binding	-0.899484	11.9477	-8.99147	1.14613e-07	2.26368e-06	7.51664
tetur04g05230	PREDICTED: similar to dehydrogenase/reductase	-0.899874	10.4337	-11.441	3.93402e-09	1.36458e-07	11.0188
tetur08g05440	ribosomal protein L13	-0.900501	11.2456	-6.65408	5.4392e-06	5.20551e-05	3.51173
tetur19g03371	n/a	-0.901418	6.95383	-7.308	1.71974e-06	2.00669e-05	4.70449
tetur02g15365	hypothetical protein	-0.901633	10.2901	-7.03113	2.78048e-06	2.9778e-05	4.2065
tetur25g01740	nucleolar complex protein 4 homolog	-0.902365	11.4728	-7.81916	7.27544e-07	9.92266e-06	5.59699
tetur03g08160	cardioacceleratory peptide receptor	-0.905418	7.81919	-9.15524	8.96991e-08	1.84751e-06	7.77133
tetur05g03400	bride of sevenless-like	-0.90597	9.28251	-5.81509	2.59567e-05	0.000187534	1.89801
tetur24g01890	Selenoprotein T homologue	-0.906307	11.4442	-8.80167	1.52855e-07	2.86096e-06	7.21745
tetur11g03080	WD40/YVTN repeat-like-containing domain	-0.90672	10.1601	-10.6862	1.04358e-08	3.13328e-07	10.0062
tetur03g03060	Hypothetical protein	-0.907086	7.18309	-7.92602	6.10414e-07	8.55439e-06	5.77922
tetur27g02190	asparaginyl-tRNA synthetase	-0.907285	12.6259	-9.21975	8.15121e-08	1.7082e-06	7.87079
tetur43g00210	licorne; MAP kinase activity	-0.908456	9.45987	-6.77396	4.38498e-06	4.3581e-05	3.7347
tetur16g00420	Hypothetical protein	-0.908989	9.74496	-9.44468	5.85971e-08	1.32858e-06	8.21378
tetur29g00610	Short-chain dehydrogenase/reductase SDR	-0.910126	9.08027	-9.35618	6.66784e-08	1.47816e-06	8.07953
tetur03g02650	alpha-glucosidase	-0.910588	12.4129	-4.73377	0.000222656	0.00110962	-0.305565
tetur02g10720	UDP-glucose 4-epimerase	-0.911978	12.7642	-10.9271	7.60056e-09	2.39238e-07	10.3354
tetur09g00820	hypothetical protein	-0.914366	8.64908	-7.05757	2.65463e-06	2.87839e-05	4.25449
tetur147g00030	Glycoside hydrolase; subgroup; catalytic core	-0.914802	12.2801	-7.71746	8.61e-07	1.14341e-05	5.42219
tetur09g00460	Na+ channel/degenerin (ENaC/DEG) family protein	-0.915206	6.88941	-5.87706	2.30517e-05	0.000170772	2.0203
tetur02g13220	acyl-CoA-delta9-desaturase	-0.915823	14.269	-3.51022	0.00288678	0.00930282	-2.88931
tetur01g06730	Serine protease	-0.916289	7.36344	-2.9019	0.0103705	0.0271511	-4.14649
tetur02g11650	N-acetylglucosaminyl-phosphatidylinositol de-N-acetylase	-0.917985	6.71214	-12.769	7.9579e-10	3.61449e-08	12.6747
tetur02g13910	Hypothetical protein	-0.918035	8.49916	-4.42287	0.000423072	0.00189628	-0.95851
tetur21g03340	Calycin-like	-0.918085	7.19482	-5.36289	6.26659e-05	0.000387501	0.991613
tetur02g14460	PAN/Apple domain	-0.918385	8.88995	-3.30383	0.00446513	0.013433	-3.3214
tetur11g00630	Hypothetical protein	-0.918462	9.85934	-13.931	2.19281e-10	1.29815e-08	14.0068
tetur06g04550	Hypothetical protein	-0.919915	12.1888	-6.99672	2.95368e-06	3.13202e-05	4.1439
tetur07g04940	Hypothetical protein	-0.921122	10.2125	-11.0582	6.41048e-09	2.07879e-07	10.5121
tetur02g15061	BTB/Kelch-associated	-0.921762	7.34296	-8.43023	2.71878e-07	4.4706e-06	6.61916
tetur17g03760	Hypothetical protein	-0.92283	8.38975	-12.0142	1.93928e-09	7.7041e-08	11.7522
tetur39g00780	vitellogenin1	-0.923927	11.973	-3.42515	0.00345584	0.0107924	-3.06792
tetur35g00700	Winged helix-turn-helix DNA-binding domain	-0.926544	7.89079	-7.04065	2.73445e-06	2.94434e-05	4.2238
tetur01g13590	PREDICTED: similar to Splicing factor 3B subunit 2	-0.929325	9.02409	-8.33965	3.13663e-07	5.00815e-06	6.47065
tetur35g01640	Peptidase S1A, chymotrypsin-type	-0.931326	7.98724	-4.65729	0.000260523	0.00127152	-0.465601
tetur04g07050	sorbitol dehydrogenase	-0.931573	11.4248	-3.34399	0.00410222	0.0124757	-3.23765
tetur10g05310	Methionine synthase reductase	-0.932087	9.61825	-9.48366	5.53707e-08	1.26988e-06	8.27263
tetur01g13780	Hypothetical protein	-0.932423	9.77392	-9.86128	3.22637e-08	7.96761e-07	8.83385
tetur27g00980	Tetratricopeptide-like helical domain	-0.932639	10.4673	-12.6854	8.7636e-10	3.95468e-08	12.5748
tetur15g02830	fat storage-inducing transmembrane protein 2	-0.933575	11.7446	-13.9324	2.18942e-10	1.29815e-08	14.0084
tetur22g02310	WD40/YVTN repeat-like-containing domain	-0.937263	10.4581	-13.9252	2.20641e-10	1.29815e-08	14.0005
tetur02g06180	cysteine-rich hydrophobic domain 2	-0.937317	9.47499	-6.71846	4.84379e-06	4.71894e-05	3.6317
tetur18g02080	Hypothetical protein	-0.940075	8.92824	-4.47147	0.000382457	0.00174153	-0.856052
tetur08g03300	WD repeat domain phosphoinositide-interacting protein 4	-0.941177	13.0769	-12.5596	1.01435e-09	4.46186e-08	12.4235
tetur10g00920	CD36 antigen	-0.941497	9.91203	-6.76582	4.44932e-06	4.40721e-05	3.71962
tetur30g01680	Hypothetical protein	-0.941566	7.87915	-4.75055	0.000215132	0.00107984	-0.270517
tetur24g02290	Hypothetical protein	-0.941831	10.1187	-8.02915	5.16001e-07	7.41765e-06	5.95368
tetur38g00130	Hypothetical protein	-0.943581	7.73399	-14.0144	2.00619e-10	1.20579e-08	14.0986
tetur12g03210	Hypothetical protein	-0.944399	8.79234	-8.9241	1.26886e-07	2.45394e-06	7.41093
tetur123g00050	Cathepsin L	-0.945606	13.7091	-4.41614	0.000429034	0.001915	-0.97271
tetur09g05200	Hypothetical protein	-0.946082	12.1249	-9.76611	3.69155e-08	8.92114e-07	8.6939
tetur148g00010	Hypothetical protein	-0.946986	8.1658	-3.09187	0.00697461	0.0195132	-3.75985
tetur03g01540	PQ-loop repeat-containing protein 1	-0.9472	10.7401	-8.61747	2.02959e-07	3.55982e-06	6.92288
tetur02g14380	Legumain	-0.948418	12.1129	-5.32908	6.70045e-05	0.000408889	0.922909
tetur02g13890	Hypothetical protein	-0.948717	11.5854	-3.8383	0.00144227	0.00519398	-2.19631
tetur08g00020	Hypothetical protein	-0.949628	9.52977	-8.32774	3.19637e-07	5.07056e-06	6.45106
tetur11g01470	Tetratricopeptide repeat	-0.951929	11.4427	-8.00836	5.33717e-07	7.62516e-06	5.91863
tetur05g07410	SAPS domain family; member 3	-0.953399	10.983	-10.3288	1.6877e-08	4.74461e-07	9.50702
tetur44g00140	intradiol ring-cleavage dioxygenase	-0.953506	10.4359	-6.44898	7.89946e-06	7.12285e-05	3.12578
tetur14g00370	PREDICTED: similar to conserved hypothetical protein	-0.953531	10.6912	-7.9652	5.72572e-07	8.09544e-06	5.84566
tetur26g02460	high affinity copper uptake protein 1	-0.954254	11.7801	-11.8864	2.26519e-09	8.79826e-08	11.5912
tetur12g00490	Band 7 protein	-0.95451	9.06767	-10.8332	8.59518e-09	2.64572e-07	10.2077
tetur12g04631	Cysteine peptidase, histidine active site	-0.956309	14.669	-8.59171	2.11234e-07	3.66806e-06	6.88136
tetur18g02580	Hypothetical protein	-0.956323	8.377	-11.1184	5.93143e-09	1.94607e-07	10.5927
tetur09g04470	Cathepsin L-like	-0.957818	14.3613	-4.59736	0.000294762	0.00141	-0.591292
tetur03g01210	N-acylneuraminate cytidylyltransferase	-0.959559	9.2763	-4.85178	0.00017494	0.000908176	-0.0595051
tetur24g01550	Small Secreted Protein; Family G	-0.960529	8.42003	-6.61575	5.82956e-06	5.53333e-05	3.44002
tetur09g03700	Hypothetical Cell Surface Protein	-0.961705	6.75347	-10.4474	1.43693e-08	4.08075e-07	9.67409
tetur16g01790	peptidase E	-0.961942	12.0166	-10.4921	1.35275e-08	3.86533e-07	9.73678
tetur07g04470	Hypothetical protein	-0.962765	7.4338	-12.426	1.18632e-09	5.10559e-08	12.2613
tetur20g00640	Hypothetical protein	-0.96349	7.38894	-11.4924	3.68834e-09	1.30203e-07	11.0856
tetur32g01010	Conserved hypothetical protein CHP02464	-0.964116	7.85069	-15.6728	3.73845e-11	3.08455e-09	15.8284
tetur01g05670	Non-specific serine/threonine protein kinase	-0.964358	11.0339	-9.47922	5.57281e-08	1.27389e-06	8.26595
tetur05g05730	Wannes-Thomas Secreted Protein 11	-0.964683	10.2042	-5.25338	7.78805e-05	0.000462704	0.76861
tetur12g01500	phosphatidylserine decarboxylase	-0.965289	12.412	-3.3188	0.00432626	0.0130518	-3.2902
tetur23g01470	Splicing factor 3B; subunit 5	-0.965924	10.0047	-5.57802	4.10665e-05	0.000272422	1.42583
tetur40g00210	Hypothetical protein	-0.965928	13.3346	-2.88028	0.0108468	0.0282283	-4.19002
tetur06g01610	Calycin-like	-0.966813	10.169	-3.21602	0.00537298	0.01571	-3.5038
tetur11g00950	Hypothetical protein	-0.966949	7.04741	-14.3043	1.47767e-10	9.58352e-09	14.414
tetur02g10650	zinc finger FYVE domain-containing protein 19	-0.968155	10.5876	-13.2573	4.5766e-10	2.27728e-08	13.2468
tetur22g01100	nucleoprotein	-0.968859	11.4752	-5.36974	6.18226e-05	0.000383476	1.00552
tetur10g04820	Protease inhibitor I4; serpin	-0.968938	10.345	-8.2812	3.4416e-07	5.36798e-06	6.37427
tetur02g02080	GJ13799	-0.970014	8.6636	-7.14535	2.27769e-06	2.53982e-05	4.4132
tetur02g07090	Hypothetical protein	-0.970791	9.12615	-11.8264	2.43769e-09	9.21169e-08	11.5151
tetur02g08690	hatching enzyme	-0.972726	9.9246	-6.59334	6.07109e-06	5.72382e-05	3.39802
tetur02g03000	Hypothetical protein	-0.974088	8.34148	-6.4731	7.55808e-06	6.87475e-05	3.17146
tetur01g10560	Pheromone shutdown, TraB	-0.976191	10.0687	-8.16448	4.14749e-07	6.21188e-06	6.18051
tetur28g01390	Cathepsin B	-0.977268	9.79492	-5.2154	8.40072e-05	0.000493012	0.690972
tetur02g01530	androgen-induced gene 1 protein	-0.97785	9.63717	-7.59907	1.04929e-06	1.34149e-05	5.21695
tetur02g06900	inositol monophosphatase 3	-0.979506	7.65635	-12.6534	9.09484e-10	4.07777e-08	12.5364
tetur02g07720	Hypothetical protein	-0.979572	13.3383	-4.78642	0.000199904	0.00101807	-0.195644
tetur09g06130	Uncharacterized epimerase/dehydratase MW0508	-0.982193	10.4106	-4.48232	0.000373947	0.00170781	-0.833198
tetur25g00500	WD40/YVTN repeat-like-containing domain	-0.983709	11.7408	-10.0684	2.41461e-08	6.23507e-07	9.13495
tetur15g03850	Hypothetical protein	-0.983874	10.0175	-8.26465	3.53347e-07	5.4503e-06	6.34691
tetur28g01310	Armadillo-type fold	-0.983974	9.8819	-5.72054	3.11406e-05	0.000217875	1.71051
tetur30g00080	39S ribosomal protein L51; mitochondrial precursor	-0.984136	9.57295	-16.0809	2.53263e-11	2.22107e-09	16.228
tetur05g07880	Mitogen-activated protein-binding protein-interacting protein	-0.984682	11.8101	-11.8461	2.37964e-09	9.07552e-08	11.5401
tetur01g14770	myo-inositol 2-dehydrogenase	-0.986525	14.4238	-4.85194	0.00017488	0.000908176	-0.0591563
tetur31g01360	synapse-associated protein 1	-0.986992	10.7934	-13.5837	3.19168e-10	1.74528e-08	13.6193
tetur42g00180	Zinc finger, CCHC-type	-0.987763	7.89443	-6.42894	8.19543e-06	7.33486e-05	3.08776
tetur04g09330	Cyclase-associated protein CAP/septum formation inhibitor MinC, C-terminal	-0.989656	8.2607	-8.89355	1.32898e-07	2.55956e-06	7.36283
tetur04g05540	ABC-transporter; class C	-0.99056	8.35637	-3.88804	0.00129848	0.00477395	-2.0909
tetur07g05980	PREDICTED: sulfiredoxin-1-like	-0.991257	12.037	-10.9132	7.74023e-09	2.43085e-07	10.3165
tetur17g01320	craniofacial development protein 1	-0.992631	11.8576	-12.3186	1.3468e-09	5.62267e-08	12.1299
tetur15g01980	conserved secreted protein 1	-0.993422	13.2284	-2.60469	0.019117	0.045606	-4.73503
tetur14g02810	Hypothetical protein	-0.995072	8.16597	-3.96721	0.00109878	0.00415889	-1.92305
tetur17g03220	scarf3b	-0.996757	9.15662	-4.82223	0.000185805	0.000955684	-0.121011
tetur12g03180	BTB/Kelch-associated	-0.998238	10.474	-12.5003	1.08724e-09	4.73766e-08	12.3516
tetur17g01780	3-hydroxyisobutyrate dehydrogenase	-0.998583	15.3495	-6.9353	3.29147e-06	3.43278e-05	4.03173
tetur20g00360	PREDICTED: 3-hydroxybutyrate dehydrogenase; type 1-like	-0.998789	10.0842	-10.2678	1.83433e-08	5.04496e-07	9.42048
tetur13g00250	leishmanolysin-like	-1.00426	11.1541	-15.3478	5.13098e-11	3.997e-09	15.5031
tetur04g00520	Hypothetical protein	-1.00465	9.69999	-3.84902	0.00140999	0.00509879	-2.1736
tetur27g00350	Cytochrome P450 - CYP392E8	-1.0068	12.3625	-4.89891	0.000158938	0.000839799	0.038463
tetur21g01340	hypothetical protein Bbu156a_O16	-1.00729	12.5176	-10.1021	2.3043e-08	6.0266e-07	9.18353
tetur16g03310	3-Pan modules Cell Surface Protein; antigen-2	-1.00909	9.53852	-4.72556	0.000226435	0.00112501	-0.322723
tetur07g07500	dopa decarboxylase	-1.00964	7.88272	-4.42583	0.000420479	0.00188526	-0.952271
tetur12g01200	50S ribosomal protein L30e-like	-1.00982	9.06483	-11.4482	3.89846e-09	1.35562e-07	11.0282
tetur05g04710	Legumain	-1.01074	9.80127	-5.71635	3.13938e-05	0.000219097	1.70217
tetur43g00400	peroxisomal acyl-coenzyme A oxidase 1	-1.01137	9.03862	-6.30035	1.03899e-05	8.88267e-05	2.84259
tetur16g00590	Hypothetical protein	-1.01155	7.1732	-4.5685	0.000312858	0.00148384	-0.651905
tetur15g00070	Blimp-1	-1.01186	8.30131	-6.92808	3.33376e-06	3.4691e-05	4.01851
tetur10g05280	Hypothetical protein	-1.01297	9.28802	-20.4342	6.41205e-13	1.19213e-10	19.9702
tetur16g02650	phosphate-starvation-inducible E	-1.01355	8.17422	-9.72526	3.91239e-08	9.34151e-07	8.63353
tetur03g08370	DNA damage-binding protein 2	-1.0149	10.2709	-7.52067	1.19731e-06	1.49868e-05	5.08004
tetur23g00860	Cathepsin L	-1.02012	10.7007	-3.68583	0.00199087	0.00679722	-2.51901
tetur02g02130	Hypothetical protein	-1.02066	7.62452	-12.8062	7.62448e-10	3.50877e-08	12.7189
tetur11g00550	GG23423	-1.02126	11.1923	-3.61597	0.00230804	0.00768831	-2.66655
tetur26g01440	Short-chain dehydrogenase/reductase SDR	-1.02456	12.0789	-7.72299	8.53124e-07	1.13627e-05	5.43172
tetur13g02400	PREDICTED: similar to F-box/LRR-repeat protein 10	-1.02735	10.0447	-11.4556	3.86238e-09	1.3498e-07	11.0378
tetur23g00250	UNCoordinated family member	-1.02911	7.68222	-8.18406	4.01918e-07	6.05875e-06	6.21314
tetur06g05540	Hypothetical protein	-1.02979	7.77095	-12.1709	1.60596e-09	6.54164e-08	11.9476
tetur05g01190	Hypothetical protein	-1.03056	11.5759	-8.72857	1.70976e-07	3.11723e-06	7.10104
tetur24g01000	conserved hypothetical protein	-1.03251	6.91848	-8.6437	1.9488e-07	3.43976e-06	6.96508
tetur07g06410	Cytochrome P450 - CYP392A1	-1.03336	9.00597	-2.70732	0.015501	0.0382492	-4.53442
tetur14g03550	28S ribosomal protein S18c; mitochondrial precursor	-1.03384	10.9159	-11.4779	3.75607e-09	1.32259e-07	11.0668
tetur10g04770	Leukocyte elastase inhibitor	-1.03413	11.0719	-8.17693	4.06541e-07	6.11522e-06	6.20127
tetur18g00630	Co-chaperone HscB, C-terminal oligomerisation domain	-1.03509	7.27566	-13.7115	2.77731e-10	1.58716e-08	13.7629
tetur04g04860	Beta-thymosin	-1.0359	11.704	-9.67816	4.18442e-08	9.9062e-07	8.56369
tetur02g12820	PREDICTED: similar to Dynein intermediate chain 2; cytosolic	-1.03811	12.6734	-8.87474	1.36749e-07	2.61926e-06	7.33315
tetur07g07960	Leucine-rich repeat domain, L domain-like	-1.03955	8.96521	-9.02005	1.09788e-07	2.18076e-06	7.56133
tetur05g00990	lipase 1 precursor	-1.04114	11.9285	-6.08051	1.56687e-05	0.000123647	2.41842
tetur22g02170	PLAT single domain protein	-1.04232	7.29255	-4.00926	0.00100563	0.00385975	-1.83389
tetur04g05200	Novel reductase 1	-1.04264	11.7045	-9.43549	5.93856e-08	1.34427e-06	8.19989
tetur20g00030	Hypothetical protein	-1.04274	10.3482	-3.71007	0.00189138	0.00649788	-2.46777
tetur27g02470	PREDICTED: hypothetical protein	-1.04318	11.4462	-8.51968	2.36315e-07	3.98931e-06	6.7648
tetur14g01110	7TM GPCR; rhodopsin-like	-1.04438	7.40343	-12.6863	8.75452e-10	3.95468e-08	12.5759
tetur348g00010	Ubiquitin-conjugating enzyme; E2	-1.04558	11.3042	-13.2977	4.37514e-10	2.2104e-08	13.2934
tetur01g09280	LYR motif-containing protein 1	-1.04976	10.2265	-9.95903	2.81237e-08	7.09143e-07	8.97653
tetur04g05830	acid phosphatase-1	-1.05096	9.7476	-4.44825	0.00040134	0.00181344	-0.904986
tetur25g00220	BTB/POZ-like	-1.05587	13.1905	-10.9767	7.12504e-09	2.2683e-07	10.4024
tetur05g05100	major facilitator superfamily MFS_1	-1.0567	9.38103	-6.26472	1.11003e-05	9.39936e-05	2.77427
tetur10g02560	Palmitoyl-protein thioesterase 1 precursor	-1.05694	13.4128	-9.35479	6.68135e-08	1.47881e-06	8.07742
tetur01g07090	Neuropeptide precursor.	-1.06	10.8148	-9.23782	7.9362e-08	1.68693e-06	7.89857
tetur03g07020	Apple-like	-1.06051	7.22603	-7.53956	1.15976e-06	1.46218e-05	5.1131
tetur31g01060	Armadillo-type fold	-1.06071	14.6952	-5.78617	2.74398e-05	0.000196619	1.84078
tetur17g02120	bone morphogenetic protein 7	-1.06248	10.0291	-13.5699	3.24045e-10	1.75817e-08	13.6036
tetur17g03440	Domain of unknown function DUF3421	-1.06382	13.2509	-5.65109	3.56236e-05	0.000243378	1.57209
tetur17g03180	inwardly rectifying k+ channel; putative	-1.06571	10.3224	-7.72061	8.56509e-07	1.13961e-05	5.42761
tetur23g02150	Hypothetical protein	-1.06592	8.7079	-5.37528	6.11496e-05	0.000380486	1.01676
tetur08g07590	Agrin NtA	-1.06691	8.66661	-11.6186	3.15054e-09	1.13811e-07	11.2491
tetur10g02360	sialin	-1.06838	8.19553	-3.42195	0.00347924	0.0108509	-3.07461
tetur02g04640	Hypothetical protein	-1.06844	7.73919	-11.548	3.44e-09	1.2331e-07	11.1579
tetur04g02300	PREDICTED: similar to Ferric-chelate reductase 1	-1.0703	8.75227	-13.4832	3.56342e-10	1.88929e-08	13.5055
tetur01g10830	Carboxylesterase type B, active site	-1.0721	13.056	-8.00071	5.40397e-07	7.69693e-06	5.90571
tetur22g02580	Hypothetical protein	-1.07692	10.5147	-6.86353	3.73778e-06	3.80927e-05	3.90004
tetur04g05660	Hypothetical protein	-1.07741	10.9962	-8.76366	1.62012e-07	2.98823e-06	7.157
tetur02g00240	RecName: Full	-1.08043	7.51945	-10.2779	1.80918e-08	4.99549e-07	9.43482
tetur06g03070	Calycin-like	-1.08304	8.72659	-3.44445	0.00331767	0.010431	-3.02745
tetur30g01100	Plexin-like fold	-1.08414	7.57103	-9.33571	6.87093e-08	1.51836e-06	8.04835
tetur10g04830	geranylgeranyl pyrophosphate synthase	-1.08816	14.0141	-7.44342	1.36467e-06	1.66047e-05	4.94432
tetur35g00750	survival of motor neuron protein-interacting protein 1	-1.08853	8.89042	-11.3259	4.55026e-09	1.54377e-07	10.8678
tetur95g00050	Hypothetical protein	-1.09115	13.9761	-3.34764	0.00407077	0.0124017	-3.23005
tetur02g08290	Dalao/Smarce1 related protein 1	-1.0951	10.2684	-10.477	1.38068e-08	3.93706e-07	9.71556
tetur36g00330	NADH dehydrogenase	-1.09594	12.118	-13.649	2.97239e-10	1.66454e-08	13.6928
tetur09g00220	UDP-glucuronosyl/UDP-glucosyltransferase	-1.09798	11.9753	-8.05431	4.95383e-07	7.18795e-06	5.99602
tetur07g03110	UV radiation resistance protein/autophagy-related protein 14	-1.09983	13.1924	-8.59013	2.11753e-07	3.66857e-06	6.87881
tetur10g05570	Hypothetical protein	-1.10253	8.63112	-8.79452	1.54536e-07	2.87697e-06	7.20609
tetur01g07700	Possibly HR83-like nuclear receptor	-1.10461	9.228	-10.1975	2.01996e-08	5.42705e-07	9.32034
tetur06g02130	Apolipoprotein D	-1.1058	11.9511	-3.80613	0.00154372	0.00548562	-2.26445
tetur08g02290	Leucine-rich repeat domain, L domain-like	-1.10614	7.87463	-9.73311	3.86891e-08	9.27735e-07	8.64514
tetur02g09640	Helix-turn-helix motif	-1.1077	8.17955	-13.6914	2.83856e-10	1.61392e-08	13.7404
tetur09g02990	Hypothetical protein	-1.11063	7.5186	-11.3016	4.69268e-09	1.58438e-07	10.8358
tetur21g00330	Transmembrane BAX inhibitor motif-containing protein 1	-1.1203	10.0369	-17.3516	7.95281e-12	8.87152e-10	17.4136
tetur17g02900	Phytanoyl-CoA dioxygenase	-1.12067	8.16976	-5.55151	4.32481e-05	0.000284458	1.37261
tetur02g15011	Kelch-type beta propeller	-1.12168	7.19672	-11.5352	3.49559e-09	1.24027e-07	11.1413
tetur06g03030	Calycin-like	-1.12209	8.20678	-4.79312	0.000197187	0.0010068	-0.181681
tetur38g00620	Hypothetical protein	-1.12303	8.01762	-9.0334	1.07609e-07	2.14052e-06	7.58216
tetur13g01260	PREDICTED: polydom	-1.12307	10.106	-9.88931	3.1015e-08	7.72273e-07	8.87486
tetur06g03470	Leucine-rich repeat domain, L domain-like	-1.12367	9.49754	-11.6572	3.0032e-09	1.09912e-07	11.2988
tetur01g13160	Immunoglobulin-like fold	-1.12494	8.97584	-10.3579	1.62217e-08	4.57884e-07	9.54815
tetur08g03430	Hypothetical protein	-1.12583	8.00516	-10.8007	8.97052e-09	2.74309e-07	10.1633
tetur19g01770	Tetraspanin/Peripherin	-1.12611	9.9641	-9.31772	7.05476e-08	1.54022e-06	8.02091
tetur01g08150	Leucine-rich repeat domain, L domain-like	-1.12831	8.60142	-8.7668	1.61235e-07	2.97782e-06	7.162
tetur13g02140	Nuclear hormone receptor; ligand-binding	-1.12851	14.5219	-8.56641	2.1971e-07	3.76831e-06	6.84049
tetur09g03740	Wannes-Thomas type-I single-pass transmembrane protein	-1.13077	12.503	-5.89834	2.21336e-05	0.000165575	2.06219
tetur21g02460	Glycoside hydrolase; family 22	-1.13592	9.50818	-5.94416	2.02833e-05	0.000153462	2.15218
tetur10g00100	Hypothetical protein	-1.14052	13.0926	-5.6693	3.43873e-05	0.000236205	1.60843
tetur09g05260	Hypothetical protein	-1.14502	9.31753	-9.68059	4.16988e-08	9.88857e-07	8.5673
tetur17g00880	PREDICTED: similar to adenylate cyclase	-1.14697	12.1937	-15.0143	7.14421e-11	5.29888e-09	15.1626
tetur06g03040	Cathepsin L	-1.14774	13.5009	-5.09989	0.000105876	0.000595539	0.453939
tetur05g07730	clathrin light chain	-1.15118	11.7392	-14.0396	1.95299e-10	1.18402e-08	14.1264
tetur02g09760	adenylosuccinate lyase	-1.15359	8.55329	-7.07529	2.5736e-06	2.8102e-05	4.28661
tetur04g00680	Ribonuclease Oy	-1.15389	11.2822	-13.4795	3.57798e-10	1.88982e-08	13.5012
tetur20g00750	Hypothetical protein	-1.15515	7.23278	-3.95873	0.0011186	0.00422474	-1.94103
tetur30g01800	Hypothetical protein	-1.1573	11.4064	-3.19434	0.00562381	0.0162626	-3.54867
tetur14g00860	UNC93-like protein MFSD11	-1.15837	9.97109	-9.5389	5.11154e-08	1.18595e-06	8.35573
tetur13g01910	CaaX prenyl proteinase Rce1	-1.1644	14.5917	-9.29046	7.3433e-08	1.58998e-06	7.97926
tetur04g08180	GPCR; family 2-like	-1.16452	11.3914	-9.4035	6.2221e-08	1.39937e-06	8.15142
tetur05g06350	Tudor domain	-1.16565	10.0383	-12.1953	1.55965e-09	6.39056e-08	11.9779
tetur08g00260	CG5892 protein	-1.16739	7.9088	-11.155	5.65939e-09	1.86559e-07	10.6414
tetur11g01020	Hypothetical protein	-1.16772	10.7273	-9.21922	8.1575e-08	1.7082e-06	7.86999
tetur10g04760	serpin 3 inhibitory serine protease inhibitor	-1.17497	11.8348	-5.91342	2.1506e-05	0.000161747	2.09184
tetur11g01730	Hypothetical protein	-1.17813	7.32892	-9.5095	5.33358e-08	1.23131e-06	8.31154
tetur08g07520	PREDICTED: similar to innexin	-1.17922	10.6857	-9.4702	5.64628e-08	1.286e-06	8.25234
tetur05g05020	UDP-glycosyltransferase; teturUGT26	-1.18368	8.88355	-4.16275	0.000728344	0.00295013	-1.50854
tetur32g01770	polypeptide N-acetylgalactosaminyltransferase 1	-1.18441	9.68281	-9.81589	3.44005e-08	8.41544e-07	8.76722
tetur16g01840	Domain of unknown function DUF3421	-1.18537	10.4756	-6.24624	1.14885e-05	9.65033e-05	2.73877
tetur14g00080	Hypothetical protein	-1.18696	7.85671	-8.34383	3.11594e-07	4.98264e-06	6.47753
tetur31g01900	Protein of unknown function DUF388; OB-fold	-1.18697	11.7873	-3.82438	0.00148531	0.00531192	-2.22579
tetur08g06770	Cathepsin B-like	-1.18709	7.65318	-4.36659	0.000475637	0.00207323	-1.0773
tetur30g00740	PAN/Apple domain	-1.19219	8.84054	-9.36957	6.53839e-08	1.45343e-06	8.0999
tetur22g92580	hypothetical protein	-1.19355	10.2896	-19.0883	1.83814e-12	2.64238e-10	18.9047
tetur23g01050	lipase 1 precursor	-1.19414	11.8775	-5.10264	0.000105292	0.000592971	0.459604
tetur04g07460	flap endonuclease 1	-1.19615	10.7541	-12.9579	6.41126e-10	3.01006e-08	12.8982
tetur13g00540	MOZART2 family	-1.19686	10.2649	-12.9184	6.70643e-10	3.13807e-08	12.8517
tetur39g00550	Coiled-coil domain containing protein 109, C-terminal	-1.19703	11.0056	-14.5669	1.12539e-10	7.52267e-09	14.6947
tetur01g11360	Protein kinase-like domain	-1.19715	11.1809	-7.64376	9.73603e-07	1.2617e-05	5.29464
tetur01g12000	Hypothetical protein	-1.19767	8.10791	-10.4938	1.34981e-08	3.86483e-07	9.73904
tetur05g03890	Concanavalin A-like lectin/glucanase	-1.19961	9.41144	-10.1731	2.08893e-08	5.54819e-07	9.28547
tetur02g01210	Hypothetical protein	-1.20074	9.31778	-14.6874	9.94551e-11	6.76489e-09	14.822
tetur08g03060	Hypothetical protein	-1.20286	9.20775	-5.02357	0.00012347	0.000677555	0.296608
tetur19g01760	CD63 antigen	-1.20413	10.9763	-8.482	2.50658e-07	4.17584e-06	6.70358
tetur01g00720	Endoplasmic reticulum; protein ERp29; C-terminal	-1.20467	10.3252	-9.78185	3.61001e-08	8.73924e-07	8.71711
tetur466g00020	Phosphatidic acid phosphatase type 2/haloperoxidase	-1.2066	8.2752	-11.3669	4.31961e-09	1.47268e-07	10.9218
tetur10g05270	Domain of unknown function DUF3421	-1.20716	9.27884	-8.16219	4.16276e-07	6.22806e-06	6.17669
tetur11g04480	Kelch-type beta propeller	-1.20739	12.6501	-10.3095	1.73261e-08	4.84158e-07	9.47974
tetur09g00020	pyruvate kinase	-1.20816	7.27785	-15.6045	3.9937e-11	3.21897e-09	15.7605
tetur02g04730	Hypothetical protein	-1.21058	7.85227	-12.6536	9.09295e-10	4.07777e-08	12.5367
tetur18g02480	Homeobox, conserved site	-1.21298	9.19036	-11.0368	6.59035e-09	2.1223e-07	10.4834
tetur24g00480	WD40 repeat, conserved site	-1.21508	9.58598	-11.8086	2.49143e-09	9.36402e-08	11.4925
tetur19g00780	inositol oxygenase	-1.21729	14.3205	-6.12632	1.43754e-05	0.000115004	2.50732
tetur15g03250	mutS protein homolog 4	-1.21742	9.60517	-14.1193	1.79498e-10	1.12239e-08	14.2134
tetur02g04810	Hypothetical protein	-1.21996	8.15826	-5.00331	0.000128626	0.000701159	0.254759
tetur32g02327	Short-chain dehydrogenase/reductase, conserved site	-1.22086	12.4143	-17.9028	4.92669e-12	5.88894e-10	17.9021
tetur07g00750	PREDICTED: hypothetical protein; partial	-1.2229	11.9396	-5.92386	2.10822e-05	0.000158731	2.11235
tetur05g04520	Small Secreted Protein; family F	-1.22306	14.3253	-7.868	6.71332e-07	9.31448e-06	5.68046
tetur02g02880	Hypothetical protein	-1.2253	7.62208	-16.8774	1.21408e-11	1.24479e-09	16.9812
tetur09g00110	methyltransferase type 11	-1.22536	14.9504	-3.44764	0.00329532	0.0103865	-3.02075
tetur05g03960	Guanine-nucleotide dissociation stimulator CDC25	-1.22913	9.25222	-14.0305	1.97198e-10	1.19036e-08	14.1164
tetur04g07470	fucosyltransferase; putative	-1.2292	10.8083	-10.215	1.97212e-08	5.30873e-07	9.34524
tetur07g02600	Leucine-rich repeat domain, L domain-like	-1.23009	7.36258	-9.93926	2.89136e-08	7.26434e-07	8.94775
tetur24g00360	Hypothetical protein	-1.23288	10.284	-7.04732	2.70267e-06	2.9214e-05	4.23591
tetur18g03670	mitochondrial ribosomal protein S31	-1.23369	9.77424	-13.4561	3.6714e-10	1.92216e-08	13.4746
tetur32g00400	inositol monophosphatase 1	-1.23657	14.2575	-14.565	1.12754e-10	7.52267e-09	14.6927
tetur03g01200	N-acylneuraminate cytidylyltransferase	-1.23895	11.2121	-5.73239	3.04359e-05	0.000213802	1.73407
tetur14g00100	Hypothetical protein	-1.24109	7.63768	-12.7721	7.9295e-10	3.61449e-08	12.6784
tetur13g01870	Hypothetical protein	-1.24531	13.2608	-6.13604	1.41156e-05	0.000113511	2.52614
tetur13g00300	P-loop containing nucleoside triphosphate hydrolase	-1.24564	8.01013	-19.2882	1.56533e-12	2.37249e-10	19.0676
tetur10g03820	Hypothetical protein	-1.24608	7.74839	-7.73079	8.42142e-07	1.12479e-05	5.44517
tetur01g12480	Hypothetical protein	-1.24803	8.21999	-10.9387	7.48617e-09	2.36706e-07	10.3511
tetur19g01900	PREDICTED: similar to prolylcarboxypeptidase	-1.25272	12.5055	-6.32982	9.83795e-06	8.46792e-05	2.89898
tetur20g00050	Hypothetical protein	-1.25389	9.14458	-7.61358	1.02407e-06	1.31246e-05	5.2422
tetur07g02420	Leucine-rich repeat domain, L domain-like	-1.25407	8.01574	-7.72295	8.5318e-07	1.13627e-05	5.43166
tetur07g00470	Alpha-ketoglutarate-dependent dioxygenase alkB homologue 7	-1.25504	11.8474	-11.8431	2.38819e-09	9.07552e-08	11.5364
tetur02g12410	BTB/Kelch-associated	-1.25517	7.18373	-5.47961	4.97892e-05	0.000320083	1.22784
tetur04g04560	Small Secreted Protein; Family E	-1.2616	12.2014	-10.101	2.30795e-08	6.0266e-07	9.18189
tetur21g03420	Cutoff-like protein	-1.26435	7.26005	-8.60348	2.07411e-07	3.62424e-06	6.90033
tetur24g00510	Hypothetical protein	-1.26455	7.46243	-16.136	2.4046e-11	2.14934e-09	16.2812
tetur12g01830	Cathepsin L	-1.26846	14.1548	-7.62589	1.00315e-06	1.29146e-05	5.26361
tetur03g03150	twist; helix-loop-helix transcription factor	-1.26912	7.96802	-15.7972	3.31703e-11	2.76962e-09	15.9512
tetur05g01100	Hypothetical protein	-1.26912	13.3042	-8.2909	3.38893e-07	5.29175e-06	6.39029
tetur02g00800	glycogen debranching enzyme	-1.27422	11.7915	-17.063	1.02747e-11	1.08538e-09	17.1519
tetur15g04070	G-protein beta WD-40 repeat; region	-1.27851	7.64771	-12.0729	1.80666e-09	7.25307e-08	11.8256
tetur05g02400	Leucine-rich repeat domain, L domain-like	-1.28865	8.50124	-6.42078	8.31911e-06	7.41698e-05	3.07228
tetur04g04320	Hypothetical protein	-1.29275	11.3814	-14.369	1.38127e-10	9.04248e-09	14.4836
tetur12g03160	BTB/Kelch-associated	-1.29446	9.01669	-11.1982	5.35397e-09	1.78602e-07	10.699
tetur02g12320	Lipase/lipooxygenase; PLAT/LH2	-1.29689	14.2623	-5.13321	9.90235e-05	0.000562437	0.522464
tetur01g06600	Major facilitator superfamily domain	-1.29816	8.72356	-3.15512	0.00610741	0.017419	-3.6297
tetur30g00070	mitochondrial intermembrane space import and assembly protein 40	-1.2982	8.64026	-19.352	1.48752e-12	2.33056e-10	19.1193
tetur12g01410	Membrane attack complex component/perforin (MACPF) domain	-1.29888	9.16842	-12.8504	7.24779e-10	3.35758e-08	12.7714
tetur03g09900	PREDICTED: similar to ECM 18	-1.30297	7.22444	-3.24112	0.00509634	0.015042	-3.45177
tetur02g07560	phosphatidylcholine-sterol acyltransferase precursor	-1.30342	7.88734	-3.17928	0.00580485	0.016703	-3.57981
tetur04g02100	basigin	-1.30415	12.2425	-14.7984	8.88238e-11	6.28711e-09	14.9385
tetur12g00110	AGAP005556-PA	-1.30516	10.2851	-13.343	4.16027e-10	2.10949e-08	13.3454
tetur18g02300	Hypothetical protein	-1.30809	8.65753	-11.3346	4.49985e-09	1.53039e-07	10.8793
tetur05g01720	conserved secreted protein 1	-1.30916	9.18875	-3.91341	0.00123077	0.0045619	-2.03711
tetur05g06370	Hypothetical protein	-1.31255	9.45562	-10.2259	1.94265e-08	5.23953e-07	9.36088
tetur35g00710	Hypothetical protein	-1.31256	10.0091	-15.2846	5.46034e-11	4.15192e-09	15.4391
tetur05g01750	deoxycytidylate deaminase	-1.32123	10.0812	-17.9216	4.84785e-12	5.88894e-10	17.9186
tetur19g02390	Hypothetical protein	-1.32182	13.5443	-6.84317	3.8756e-06	3.92173e-05	3.86255
tetur26g02470	Hypothetical protein	-1.32431	10.5821	-7.40104	1.46671e-06	1.76613e-05	4.86953
tetur09g02680	Hypothetical protein	-1.32447	9.03837	-14.7005	9.81298e-11	6.7405e-09	14.8358
tetur20g02800	Plant self-incompatibility S1	-1.32759	9.53032	-10.3643	1.60817e-08	4.54853e-07	9.55715
tetur05g05000	ABC-transporter; class H	-1.33703	7.91876	-8.14256	4.29619e-07	6.40022e-06	6.14393
tetur01g09880	Hypothetical protein	-1.33861	11.4144	-6.32755	9.87932e-06	8.49828e-05	2.89464
tetur03g08820	Small secreted protein; family B	-1.33994	12.1864	-8.19828	3.92865e-07	5.94155e-06	6.2368
tetur06g06270	Zinc finger, MYND-type	-1.34073	12.7071	-13.9808	2.0791e-10	1.24424e-08	14.0618
tetur24g00640	Hypothetical protein	-1.34159	10.6814	-7.26395	1.85507e-06	2.12897e-05	4.62595
tetur35g01170	lipoprotein lipase	-1.34452	6.72827	-11.0172	6.76046e-09	2.17207e-07	10.4569
tetur07g00490	Leucine-rich repeat domain, L domain-like	-1.34728	7.42703	-11.4163	4.05837e-09	1.39728e-07	10.9865
tetur19g01060	PREDICTED: similar to sodium-dependent phosphate transporter	-1.34778	10.7963	-4.11402	0.000806767	0.00321324	-1.61178
tetur17g03500	Tetraspanin/Peripherin	-1.34782	8.37007	-8.3212	3.2297e-07	5.1118e-06	6.44028
tetur26g01260	cuticular protein analogous to peritrophins 1-A	-1.36011	11.1263	-8.45345	2.62139e-07	4.33602e-06	6.65706
tetur06g06350	Na+/H+ exchanger, isoform 8	-1.36014	10.7685	-12.4048	1.21625e-09	5.19235e-08	12.2355
tetur16g01290	viral A-type inclusion protein	-1.3606	10.9609	-12.6377	9.2626e-10	4.11648e-08	12.5175
tetur02g09750	Orfan gene family A; member-17	-1.36072	7.46246	-4.84951	0.00017575	0.000911704	-0.0642239
tetur02g14731	BTB/Kelch-associated	-1.36095	8.84447	-13.2112	4.81811e-10	2.37398e-08	13.1937
tetur36g00530	palmitoyl-protein thioesterase 1	-1.36106	8.25157	-6.51642	6.98285e-06	6.44736e-05	3.25331
tetur02g13860	Hypothetical protein	-1.3626	7.72098	-12.7907	7.76146e-10	3.56006e-08	12.7005
tetur05g04320	alpha/beta hydrolase fold protein	-1.3643	11.5343	-8.12644	4.4091e-07	6.53352e-06	6.11699
tetur12g00590	C-factor	-1.36661	9.16368	-8.00644	5.35393e-07	7.63794e-06	5.91537
tetur01g01420	Hypothetical protein	-1.36676	8.12124	-17.121	9.75675e-12	1.04652e-09	17.2047
tetur01g03340	tRNA/rRNA methyltransferase	-1.36941	10.1171	-10.1891	2.04337e-08	5.46885e-07	9.30837
tetur184g00010	Hypothetical protein	-1.36955	9.65629	-4.52897	0.000339503	0.00158364	-0.735009
tetur26g01230	phosphatidylethanolamine-binding protein	-1.36957	10.9952	-2.69259	0.0159762	0.0392205	-4.56339
tetur01g10430	sodium-dependent glucose transporter 1	-1.37125	7.55035	-4.24481	0.000613309	0.00255359	-1.33476
tetur02g01270	short-chain dehydrogenase/reductase SDR	-1.37633	11.267	-6.07248	1.59078e-05	0.000125109	2.40279
tetur13g00560	MOZART2 family	-1.3766	8.61162	-13.1979	4.89076e-10	2.40129e-08	13.1782
tetur02g11170	cys-loop ligand-gated ion channel	-1.37861	8.89285	-19.6103	1.21209e-12	2.01991e-10	19.3267
tetur07g06910	Hypothetical protein	-1.37877	8.14538	-10.1095	2.28093e-08	5.9897e-07	9.19412
tetur06g06100	UDP-glycosyltransferase; teturUGT35	-1.37952	10.8628	-11.4485	3.89705e-09	1.35562e-07	11.0285
tetur01g15480	Hypothetical protein	-1.38268	10.7501	-8.87901	1.35864e-07	2.6059e-06	7.33989
tetur06g00600	Hypothetical protein	-1.38379	8.29834	-16.4838	1.73917e-11	1.67249e-09	16.6133
tetur11g00440	Tetratricopeptide-like helical	-1.3927	9.6833	-7.99741	5.43313e-07	7.73057e-06	5.90012
tetur01g13080	Leucine-rich repeat domain, L domain-like	-1.39551	7.23798	-11.6507	3.02749e-09	1.10511e-07	11.2904
tetur19g03190	Hypothetical protein	-1.40885	9.36723	-19.3842	1.44983e-12	2.29732e-10	19.1453
tetur01g13750	PREDICTED: similar to dimethylaniline monooxygenase	-1.40895	11.1337	-5.7176	3.13179e-05	0.000218802	1.70466
tetur09g05140	galactokinase	-1.41088	8.60982	-9.51119	5.32048e-08	1.23033e-06	8.3141
tetur06g03380	Hypothetical protein	-1.41127	9.97557	-5.38853	5.9569e-05	0.000372313	1.04364
tetur01g13610	Proteinase inhibitor I32; inhibitor of apoptosis	-1.41315	9.67546	-19.6599	1.16568e-12	2.0067e-10	19.3662
tetur03g01070	PREDICTED: hypothetical protein	-1.41489	9.24112	-12.2582	1.44705e-09	5.98745e-08	12.0555
tetur03g05420	Homeodomain-like	-1.41986	7.91839	-11.1619	5.6091e-09	1.8578e-07	10.6507
tetur09g04720	Apolipoprotein D precursor	-1.42128	10.4499	-5.5227	4.5755e-05	0.000298274	1.31468
tetur20g00530	Phosphatidic acid phosphatase type 2/haloperoxidase	-1.4216	12.7172	-6.66346	5.34788e-06	5.13573e-05	3.52925
tetur05g05220	Glutathione S-transferase; class mu	-1.42279	11.1022	-9.65566	4.32135e-08	1.01614e-06	8.53023
tetur11g01070	Hypothetical protein	-1.42637	9.0175	-6.07187	1.59261e-05	0.000125112	2.40161
tetur09g04120	segment polarity gene PORCUPINE	-1.42965	11.377	-17.7858	5.44762e-12	6.43742e-10	17.7997
tetur01g02960	Peptidase M28	-1.43416	11.7851	-10.2608	1.85201e-08	5.07356e-07	9.41052
tetur17g03400	Domain of unknown function DUF3421	-1.43612	11.3746	-7.47124	1.30174e-06	1.59925e-05	4.99329
tetur30g00780	farnesoic acid O-methyltransferase-like protein	-1.43898	14.7327	-13.0965	5.4807e-10	2.65357e-08	13.0604
tetur07g02660	Leucine-rich repeat domain, L domain-like	-1.44203	7.80597	-8.58014	2.15066e-07	3.71609e-06	6.86268
tetur04g03130	PREDICTED: rCG19957-like	-1.45501	9.05183	-7.70134	8.84409e-07	1.16893e-05	5.39435
tetur10g01710	Hypothetical protein	-1.46008	7.23253	-16.4057	1.86939e-11	1.76127e-09	16.5393
tetur01g08070	Leucine-rich repeat domain, L domain-like	-1.46034	9.48035	-7.80967	7.39028e-07	1.00243e-05	5.58074
tetur27g01120	Hypothetical protein	-1.46301	11.4279	-8.69905	1.7892e-07	3.22066e-06	7.05386
tetur01g03900	Methyltransferase type 11	-1.46683	7.3103	-7.68662	9.06372e-07	1.18826e-05	5.36889
tetur05g05630	Geneb-a protein	-1.46792	7.01693	-7.96472	5.7302e-07	8.09544e-06	5.84485
tetur02g14410	Legumain	-1.47256	8.98518	-3.40675	0.00359285	0.0111323	-3.10645
tetur09g05160	tyrosyl-tRNA synthetase	-1.47611	10.139	-11.8543	2.35582e-09	9.07552e-08	11.5505
tetur18g00650	Hypothetical protein	-1.47826	7.65253	-9.75264	3.76289e-08	9.06213e-07	8.67401
tetur19g03010	Hypothetical protein	-1.4793	11.7616	-11.1683	5.56322e-09	1.84699e-07	10.6592
tetur04g07700	PREDICTED: similar to DNA topoisomerase type I	-1.49105	9.29972	-14.6148	1.07136e-10	7.25195e-09	14.7454
tetur20g01360	Hypothetical protein	-1.49247	14.6175	-8.79295	1.54907e-07	2.88004e-06	7.20359
tetur128g00050	Leukocyte elastase inhibitor	-1.50416	10.38	-8.30077	3.33618e-07	5.23871e-06	6.40659
tetur03g05890	eukaryotic translation initiation factor 4E	-1.50499	14.2929	-14.9838	7.36672e-11	5.4064e-09	15.131
tetur18g02180	Hypothetical protein	-1.50588	10.1842	-15.1924	5.98172e-11	4.48436e-09	15.3453
tetur23g02450	n/a	-1.50622	9.95524	-10.5021	1.33475e-08	3.82959e-07	9.75069
tetur01g08280	Nuclear hormone receptor, ligand-binding domain	-1.50835	10.0483	-12.4472	1.15712e-09	5.01085e-08	12.2871
tetur20g00580	Nose resistant-to-fluoxetine protein; N-terminal	-1.51089	11.0598	-11.8723	2.30465e-09	8.92666e-08	11.5733
tetur31g01190	Transcription factor IIIA	-1.5109	10.5218	-19.2362	1.63191e-12	2.42079e-10	19.0254
tetur26g00570	PREDICTED: si:dkey-88l16.3	-1.51102	14.1066	-4.59687	0.000295062	0.00141047	-0.592326
tetur04g06920	variable lymphocyte receptor A	-1.52077	11.7679	-31.7863	6.28304e-16	4.38053e-13	26.7735
tetur38g00350	phospholipase A2 precursor; putative	-1.52349	11.7094	-6.90176	3.49272e-06	3.60225e-05	3.97027
tetur07g03980	Peptidase M14; carboxypeptidase A	-1.52938	8.89052	-18.6782	2.56845e-12	3.44369e-10	18.565
tetur02g11610	Major facilitator superfamily domain	-1.52954	10.3787	-22.0918	1.90867e-13	4.53319e-11	21.1881
tetur05g05450	Hypothetical protein	-1.53571	10.3001	-4.86775	0.000169339	0.000883375	-0.0262793
tetur09g00540	Domain of unknown function DUF3421	-1.5361	10.9472	-13.0526	5.75861e-10	2.74142e-08	13.0093
tetur06g02780	Hypothetical protein	-1.54309	9.08654	-4.44189	0.000406677	0.0018328	-0.918395
tetur19g00870	PREDICTED: similar to cellular senescence inhibited gene protein	-1.54525	13.3163	-13.6261	3.04758e-10	1.69305e-08	13.667
tetur22g02750	Small Secreted Protein; family A	-1.546	8.46974	-6.47408	7.54454e-06	6.8714e-05	3.17331
tetur35g01330	n/a	-1.55002	8.5426	-19.1536	1.74379e-12	2.53285e-10	18.9581
tetur20g00710	Hypothetical protein	-1.55867	9.0546	-6.06065	1.62666e-05	0.000127517	2.37978
tetur08g05430	trafficking protein particle complex subunit 2	-1.56267	11.1858	-16.3722	1.92828e-11	1.79253e-09	16.5075
tetur02g08490	Terpenoid synthase	-1.56728	10.1417	-21.275	3.42966e-13	7.35741e-11	20.6002
tetur23g00880	Cathepsin L	-1.57422	12.2724	-6.77839	4.35039e-06	4.33298e-05	3.7429
tetur24g00530	chitobiosyldiphosphodolichol beta-mannosyltransferase	-1.57601	11.4781	-26.5279	1.08872e-14	4.74411e-12	24.0247
tetur57g00130	Hypothetical protein	-1.58141	9.08825	-22.6377	1.30464e-13	3.36888e-11	21.5685
tetur01g07900	Type-II Transmembrane Protein	-1.58293	12.6718	-10.8031	8.94225e-09	2.74046e-07	10.1666
tetur21g00400	PREDICTED: similar to Eukaryotic translation initiation factor 5B	-1.58298	11.6726	-9.99458	2.67598e-08	6.80909e-07	9.02818
tetur16g01500	senseless-2	-1.58334	9.13891	-18.594	2.75339e-12	3.58816e-10	18.4943
tetur33g01660	Hypothetical protein	-1.5838	10.5496	-8.62087	2.01892e-07	3.54557e-06	6.92835
tetur17g02390	Concanavalin A-like lectin/glucanase	-1.58413	10.7383	-8.01935	5.24274e-07	7.50562e-06	5.93716
tetur19g01720	CD63 antigen	-1.58616	11.2338	-15.5467	4.22404e-11	3.38506e-09	15.7029
tetur97g00020	chaperone protein DnaJ	-1.58757	8.48757	-7.2455	1.91501e-06	2.19416e-05	4.59298
tetur10g01330	Hypothetical protein	-1.59367	7.90722	-9.58441	4.78678e-08	1.12368e-06	8.42394
tetur09g04730	Apolipoprotein D precursor	-1.59463	9.50121	-5.00169	0.000129049	0.000703188	0.251404
tetur16g03380	Serine protease homologue	-1.59684	10.2452	-8.041	5.06179e-07	7.29903e-06	5.97363
tetur16g02350	PREDICTED: anillin; actin binding protein	-1.60749	10.829	-19.478	1.34571e-12	2.15685e-10	19.2208
tetur19g01070	sialin; putative	-1.60787	10.5872	-6.2108	1.22728e-05	0.000101502	2.67057
tetur12g00580	Hypothetical protein	-1.61581	8.17662	-10.8858	8.02259e-09	2.50262e-07	10.2793
tetur17g03340	beta-tubulin	-1.61593	13.218	-14.9958	7.27812e-11	5.36964e-09	15.1435
tetur27g02588	Insulin-like growth factor binding protein, N-terminal	-1.61775	12.3563	-10.7306	9.83981e-09	2.99577e-07	10.0673
tetur03g00150	Hypothetical protein	-1.62526	9.75415	-13.542	3.34068e-10	1.79855e-08	13.5721
tetur02g01650	Immunoglobulin-like fold	-1.64747	8.97109	-14.8432	8.48816e-11	6.06969e-09	14.9852
tetur02g12500	BTB/Kelch-associated	-1.65199	8.83628	-10.1402	2.18604e-08	5.76231e-07	9.23827
tetur39g00360	3-Pan modules Cell Surface Protein; antigen-2	-1.6522	12.3473	-13.6369	3.01167e-10	1.67979e-08	13.6792
tetur04g00940	Immunoglobulin subtype	-1.65811	9.84753	-20.3867	6.64746e-13	1.21963e-10	19.9338
tetur31g01080	39S ribosomal protein L18; mitochondrial precursor	-1.67428	9.97585	-12.3519	1.2947e-09	5.43774e-08	12.1708
tetur01g08370	Leucine-rich repeat domain, L domain-like	-1.6753	8.28703	-6.84664	3.85176e-06	3.90326e-05	3.86894
tetur14g00110	Hypothetical protein	-1.68023	8.45186	-14.358	1.3971e-10	9.10337e-09	14.4718
tetur09g02450	leucine rich repeat family protein	-1.68044	10.3524	-18.2473	3.6772e-12	4.66135e-10	18.2001
tetur12g00570	C-signal	-1.68251	9.87262	-8.85306	1.41333e-07	2.68129e-06	7.29889
tetur04g06440	Hypothetical protein	-1.68705	8.30014	-8.29197	3.38316e-07	5.29175e-06	6.39206
tetur07g08169	Leucine-rich repeat domain, L domain-like	-1.68783	10.3312	-14.926	7.80713e-11	5.64055e-09	15.0713
tetur07g02190	Leucine-rich repeat domain, L domain-like	-1.69237	8.18239	-15.7565	3.44917e-11	2.86281e-09	15.9111
tetur11g01100	Hypothetical protein	-1.71588	9.04324	-12.1692	1.60914e-09	6.54164e-08	11.9456
tetur10g05772	Serine proteases, trypsin family, histidine active site	-1.71974	8.62554	-9.86197	3.22325e-08	7.96761e-07	8.83485
tetur18g03330	UPF0517 membrane protein CG10671	-1.72106	10.6626	-19.3234	1.52184e-12	2.35446e-10	19.0961
tetur24g00170	photosystem II CP47 protein	-1.73428	7.24117	-10.5048	1.32997e-08	3.82959e-07	9.75442
tetur04g02440	PREDICTED: similar to adenylate cyclase	-1.74166	8.10459	-7.15467	2.2411e-06	2.50802e-05	4.42998
tetur37g00740	Hypothetical protein	-1.75282	8.94246	-13.4538	3.68056e-10	1.92216e-08	13.472
tetur05g06400	Hypothetical protein	-1.75384	8.46789	-18.9638	2.03323e-12	2.86377e-10	18.8023
tetur04g01470	Hypothetical protein	-1.75446	8.15527	-9.41128	6.15184e-08	1.38805e-06	8.16323
tetur01g03820	UDP-glycosyltransferase; teturUGT01	-1.75714	7.83197	-4.64823	0.000265428	0.00129004	-0.484594
tetur09g04920	apolipoprotein D precursor	-1.75737	10.2487	-3.48915	0.00301837	0.00966656	-2.93361
tetur02g14741	BTB/Kelch-associated	-1.77514	9.8667	-16.9679	1.119e-11	1.16443e-09	17.0646
tetur17g02910	phytanoyl-CoA dioxygenase domain-containing protein 1	-1.77533	13.801	-6.15277	1.36796e-05	0.000110643	2.55853
tetur95g00090	PREDICTED: similar to ECM 18	-1.77933	7.39138	-5.17043	9.19077e-05	0.000530864	0.598857
tetur05g00490	Hypothetical protein	-1.78664	10.2235	-14.2153	1.62214e-10	1.02814e-08	14.3178
tetur04g00300	Hypothetical protein	-1.78757	8.96848	-20.8442	4.71211e-13	9.38653e-11	20.2806
tetur30g01850	PREDICTED: hypothetical protein	-1.78797	16.8582	-6.45923	7.75247e-06	7.01951e-05	3.1452
tetur04g06000	Apolipoprotein D precursor	-1.7915	15.7463	-4.99274	0.000131406	0.000714079	0.232892
tetur02g15041	BTB/Kelch-associated	-1.79343	7.61124	-14.76	9.23569e-11	6.50416e-09	14.8983
tetur01g11880	conserved zygote-specific protein homologue	-1.79459	12.63	-12.0879	1.77432e-09	7.17134e-08	11.8443
tetur43g00080	vitellogenin; partial sequence	-1.79913	10.3186	-4.82186	0.000185945	0.000956053	-0.121782
tetur01g01510	Apolipoprotein D precursor; putative	-1.80591	12.128	-6.6668	5.31577e-06	5.11194e-05	3.53548
tetur01g07230	eukaryotic translation initiation factor 6	-1.80723	11.5116	-12.3361	1.31915e-09	5.52379e-08	12.1514
tetur06g05100	3-oxoacyl-acyl-carrier-protein reductase	-1.80996	12.8871	-9.26922	7.57677e-08	1.63293e-06	7.94673
tetur07g02240	Leucine-rich repeat domain, L domain-like	-1.814	8.80614	-16.0815	2.53125e-11	2.22107e-09	16.2286
tetur19g02860	cuticle protein; putative	-1.81729	10.2912	-5.73012	3.05697e-05	0.000214527	1.72955
tetur12g04671	Intradiol ring-cleavage dioxygenase, C-terminal	-1.82203	8.964	-5.84757	2.43896e-05	0.000178712	1.96217
tetur02g14951	BTB/Kelch-associated	-1.82655	7.65517	-13.4914	3.53141e-10	1.88666e-08	13.5148
tetur20g02080	NADH dehydrogenase subunit 3	-1.82706	8.68198	-10.5025	1.33395e-08	3.82959e-07	9.75132
tetur13g04410	Chemosensory Receptor; Gustatory receptor family	-1.82842	9.88976	-16.2719	2.11713e-11	1.94218e-09	16.4118
tetur01g11890	Conserved zygote-specific protein homologue	-1.83085	10.145	-13.8265	2.45298e-10	1.41927e-08	13.8911
tetur02g08040	spectrin; alpha; non-erythrocytic 1	-1.83436	7.59206	-8.23312	3.71573e-07	5.68739e-06	6.29468
tetur24g02340	Nitrilase/cyanide hydratase and apolipoprotein N-acyltransferase	-1.84719	12.7589	-5.04377	0.00011854	0.00065488	0.338302
tetur05g04170	RNA 3'-terminal phosphate cyclase-like protein	-1.85443	9.52769	-15.2812	5.47872e-11	4.15192e-09	15.4356
tetur06g04920	3-oxoacyl-acyl-carrier-protein reductase	-1.85888	8.32649	-9.31298	7.1041e-08	1.54298e-06	8.01367
tetur24g00820	BTB/POZ-like	-1.85982	10.3425	-20.6471	5.46042e-13	1.0575e-10	20.1321
tetur20g01410	Hypothetical protein	-1.87325	13.6077	-9.3203	7.02806e-08	1.53845e-06	8.02485
tetur02g13120	PMS1	-1.87769	8.30237	-16.1914	2.28264e-11	2.06683e-09	16.3346
tetur06g02820	Cytochrome P450 - CYP392E3	-1.88826	9.4053	-14.7309	9.51416e-11	6.64185e-09	14.8677
tetur343g00010	Six-bladed beta-propeller; TolB-like	-1.89418	12.9535	-15.1992	5.9416e-11	4.47836e-09	15.3522
tetur03g08800	Small secreted protein; family B	-1.90196	15.0637	-14.7998	8.86978e-11	6.28711e-09	14.9399
tetur21g02980	Hypothetical protein	-1.90777	8.41209	-12.1317	1.68314e-09	6.82258e-08	11.899
tetur31g01270	Hypothetical protein	-1.90819	9.86955	-19.9338	9.4126e-13	1.68268e-10	19.5825
tetur19g02210	Hypothetical protein	-1.91528	11.9133	-8.80733	1.51541e-07	2.844e-06	7.22642
tetur28g01730	3-oxoacyl-acyl-carrier-protein reductase	-1.93815	14.4349	-8.00608	5.35707e-07	7.63794e-06	5.91476
tetur11g00840	Hypothetical protein	-1.95249	7.88314	-17.5783	6.52005e-12	7.39152e-10	17.6164
tetur16g01650	Na+ channel, amiloride-sensitive	-1.9597	8.56535	-19.3114	1.53655e-12	2.35446e-10	19.0864
tetur07g02180	Leucine-rich repeat domain, L domain-like	-1.9605	9.49303	-16.5315	1.66438e-11	1.62294e-09	16.6583
tetur13g01730	Hypothetical protein	-1.96822	14.4747	-6.27765	1.08369e-05	9.20274e-05	2.79908
tetur21g03120	Cutoff-like protein	-1.98284	9.52665	-16.3883	1.89978e-11	1.77788e-09	16.5228
tetur05g02100	Leucine-rich repeat domain, L domain-like	-1.98302	7.74857	-16.7479	1.36536e-11	1.36968e-09	16.8611
tetur22g02790	Insect antifreeze protein	-1.98859	10.0901	-8.59624	2.09755e-07	3.64691e-06	6.88866
tetur10g01530	Hypothetical protein	-1.98924	10.4546	-24.8445	3.04685e-14	1.03623e-11	23.0131
tetur14g01130	glucan	-1.99006	7.68975	-17.6409	6.17493e-12	7.05764e-10	17.6718
tetur01g11400	Protein atonal/lin-32	-1.99339	10.4741	-17.2855	8.43056e-12	9.32982e-10	17.354
tetur02g14701	BTB/Kelch-associated	-1.99563	8.31102	-19.637	1.18689e-12	2.01829e-10	19.3479
tetur01g13100	Leucine-rich repeat domain, L domain-like	-2.00874	8.4323	-15.4133	4.81159e-11	3.78666e-09	15.5691
tetur14g03430	Hypothetical protein	-2.01681	9.88616	-5.85027	2.42639e-05	0.000178023	1.96749
tetur02g90622	hypothetical protein	-2.01689	13.3388	-13.0255	5.93826e-10	2.81643e-08	12.9775
tetur05g09325	UDP-glucuronosyl/UDP-glucosyltransferase	-2.01899	9.25496	-4.349	0.00049339	0.00213792	-1.11445
tetur06g05070	short-chain dehydrogenase/reductase SDR	-2.01996	9.19282	-9.39305	6.31772e-08	1.41177e-06	8.13558
tetur30g01840	Hypothetical protein	-2.02273	11.2197	-22.0848	1.91809e-13	4.53319e-11	21.1832
tetur16g01170	Hypothetical protein	-2.02433	11.9452	-11.383	4.23265e-09	1.44657e-07	10.9429
tetur30g00110	exosome complex exonuclease RRP46	-2.03458	8.36438	-15.4114	4.82017e-11	3.78666e-09	15.5673
tetur43g00560	Hypothetical protein	-2.03519	9.45902	-5.91088	2.16103e-05	0.000162357	2.08685
tetur02g01180	Guanylate-binding protein; C-terminal	-2.04281	10.4948	-18.6346	2.66243e-12	3.53571e-10	18.5285
tetur21g03190	Calycin-like	-2.04594	8.46015	-12.8516	7.23805e-10	3.35758e-08	12.7728
tetur17g00590	variable lymphocyte receptor A	-2.04717	11.4142	-17.7082	5.82506e-12	6.71278e-10	17.7313
tetur24g00220	Hypothetical protein	-2.0645	12.078	-10.5891	1.18776e-08	3.48677e-07	9.87186
tetur02g12360	BTB/Kelch-associated	-2.08034	8.56451	-18.7305	2.46018e-12	3.33056e-10	18.6088
tetur26g02650	antigen; p83/100	-2.08041	8.21713	-33.4357	2.82069e-16	2.45824e-13	27.5281
tetur25g01310	Hypothetical protein	-2.0968	7.95669	-13.7923	2.54491e-10	1.46637e-08	13.8531
tetur07g06740	Major facilitator superfamily; general substrate transporter	-2.10957	10.8216	-9.3907	6.3395e-08	1.41437e-06	8.132
tetur03g04460	Fibronectin; type III-like fold	-2.11913	11.6083	-5.39111	5.92663e-05	0.000370753	1.04888
tetur06g06620	Cystatin domain	-2.15301	9.37656	-20.8592	4.65978e-13	9.38653e-11	20.2919
tetur05g04550	Legumain	-2.1778	8.08995	-13.2581	4.57211e-10	2.27728e-08	13.2479
tetur15g01780	viral A-type inclusion protein	-2.18972	9.64338	-6.71555	4.86916e-06	4.73801e-05	3.62629
tetur63g00050	hypothetical phage protein	-2.19282	9.99324	-4.48465	0.000372146	0.00170194	-0.828293
tetur24g00770	BTB/POZ-like	-2.19582	8.22201	-21.6769	2.56394e-13	5.76639e-11	20.8923
tetur09g05180	Hypothetical protein	-2.19762	9.32171	-20.7572	5.02797e-13	9.87465e-11	20.2153
tetur39g00220	Hypothetical protein	-2.2049	12.2404	-11.0995	6.07768e-09	1.98471e-07	10.5674
tetur21g03160	Calycin-like	-2.20576	8.51248	-9.31632	7.06927e-08	1.54022e-06	8.01878
tetur02g90629	hypothetical protein	-2.22209	10.5963	-11.844	2.38581e-09	9.07552e-08	11.5374
tetur11g00740	PREDICTED: similar to limkain b1	-2.22408	9.27789	-16.4616	1.77512e-11	1.69536e-09	16.5923
tetur01g12620	Wannes-Thomas Secreted Protein 1	-2.23011	8.71149	-10.1042	2.29769e-08	6.02238e-07	9.18651
tetur02g08060	Hypothetical protein	-2.23519	7.94013	-10.9054	7.81868e-09	2.44997e-07	10.306
tetur02g12430	BTB/Kelch-associated	-2.23871	7.86352	-8.50849	2.40482e-07	4.03769e-06	6.74664
tetur07g01070	exocyst complex component 7	-2.23879	9.99022	-38.2983	3.2701e-17	4.00032e-14	29.5132
tetur06g06420	glutamyl-tRNA synthetase	-2.24573	10.8809	-28.4913	3.53813e-15	1.89752e-12	25.1183
tetur20g00560	Hypothetical protein	-2.24718	12.3116	-12.7701	7.94838e-10	3.61449e-08	12.6759
tetur16g03790	Cytochrome P450 - CYP392A10	-2.25573	8.1116	-14.1023	1.82739e-10	1.13755e-08	14.1949
tetur32g01020	Conserved hypothetical protein CHP02464	-2.26104	11.297	-13.1821	4.97763e-10	2.43537e-08	13.16
tetur02g07800	Hypothetical protein	-2.26782	8.66799	-16.5447	1.64426e-11	1.61461e-09	16.6708
tetur20g00010	Hypothetical protein	-2.27286	14.081	-5.75746	2.89991e-05	0.000206202	1.78386
tetur01g11840	Conserved zygote-specific protein homologue	-2.27367	13.9175	-7.55732	1.12557e-06	1.42423e-05	5.14414
tetur01g13090	Leucine-rich repeat domain, L domain-like	-2.27494	7.82919	-18.9152	2.11519e-12	2.92021e-10	18.7622
tetur22g03073	Zinc finger, CXXC-type	-2.28927	10.972	-6.75164	4.56383e-06	4.49104e-05	3.69332
tetur19g02850	Hypothetical protein	-2.29762	10.7221	-17.1218	9.74933e-12	1.04652e-09	17.2055
tetur05g04680	UDP-glycosyltransferase; teturUGT24	-2.32802	11.0634	-31.8211	6.17524e-16	4.38053e-13	26.7899
tetur24g00900	Kelch-type beta propeller	-2.32963	8.8297	-25.5107	2.01192e-14	7.5822e-12	23.4222
tetur23g00740	UDP-glucuronosyl/UDP-glucosyltransferase	-2.33215	13.3754	-10.1402	2.18607e-08	5.76231e-07	9.23825
tetur30g01690	UNCoordinated family member	-2.33243	14.5455	-13.4856	3.55422e-10	1.88929e-08	13.5081
tetur02g12370	BTB/Kelch-associated	-2.34181	7.63433	-11.6242	3.12874e-09	1.13317e-07	11.2563
tetur05g05600	Highly expressed secreted protein family	-2.35017	9.36287	-16.7757	1.3313e-11	1.34519e-09	16.8869
tetur02g14300	Hypothetical protein	-2.35753	7.75163	-20.563	5.81712e-13	1.11115e-10	20.0684
tetur02g09730	adenylosuccinate lyase	-2.35889	11.0017	-15.1079	6.50649e-11	4.85169e-09	15.2588
tetur28g01720	short-chain dehydrogenase/reductase SDR	-2.37929	10.5286	-10.6753	1.05881e-08	3.14414e-07	9.9912
tetur02g08740	Hypothetical protein	-2.40691	10.0631	-22.6857	1.26225e-13	3.3209e-11	21.6015
tetur24g00860	kelch-like 18	-2.4373	8.55168	-21.801	2.34593e-13	5.36257e-11	20.9814
tetur24g00870	Galactose oxidase/kelch; beta-propeller	-2.44979	8.74607	-24.2751	4.38104e-14	1.42068e-11	22.6539
tetur01g15070	Hypothetical protein	-2.44996	11.6866	-19.2659	1.5935e-12	2.38922e-10	19.0495
tetur149g00010	UNCoordinated family member	-2.45816	9.40102	-19.21	1.66647e-12	2.44602e-10	19.0041
tetur30g01780	Hypothetical protein	-2.45883	13.2404	-9.31445	7.08876e-08	1.54205e-06	8.01591
tetur01g91124	hypothetical protein	-2.47088	10.5917	-25.7163	1.77378e-14	7.06675e-12	23.5461
tetur06g05090	short chain dehydrogenase	-2.49719	9.84458	-10.3143	1.72144e-08	4.82002e-07	9.48646
tetur20g00020	Hypothetical protein	-2.51802	13.1944	-8.25616	3.58162e-07	5.51238e-06	6.33286
tetur11g00730	PREDICTED: similar to limkain b1	-2.52099	9.32543	-23.1601	9.13815e-14	2.54845e-11	21.9237
tetur02g15051	BTB/Kelch-associated	-2.54009	8.34097	-14.0399	1.95247e-10	1.18402e-08	14.1266
tetur02g11030	proteasome assembly chaperone 2	-2.55101	9.39034	-47.8712	9.36532e-19	2.84272e-15	32.6108
tetur01g02510	Glutathione S-transferase; class delta	-2.56683	15.787	-26.7018	9.82448e-15	4.41912e-12	24.1252
tetur02g02910	Hypothetical protein	-2.59823	8.28774	-22.9715	1.03831e-13	2.78426e-11	21.7964
tetur01g10110	Hypothetical protein	-2.60687	8.9345	-8.15155	4.23452e-07	6.32186e-06	6.15894
tetur24g00830	BTB/POZ-like	-2.61403	8.4267	-24.6483	3.44975e-14	1.14532e-11	22.8904
tetur24g00520	WD40 repeat, conserved site	-2.61643	11.317	-23.1727	9.06098e-14	2.54845e-11	21.9321
tetur06g03360	Apolipoprotein D precursor	-2.61856	9.44457	-5.74781	2.9544e-05	0.000209093	1.76469
tetur03g08840	Type II Keratin; homologue of keratin 78	-2.63165	14.56	-13.2653	4.53598e-10	2.27517e-08	13.2561
tetur16g01050	Hypothetical protein	-2.63706	10.1307	-25.0652	2.65234e-14	9.24605e-12	23.1499
tetur40g00150	Hypothetical protein	-2.65317	15.0894	-11.6898	2.88413e-09	1.06393e-07	11.3407
tetur33g01630	Hypothetical protein	-2.65938	10.265	-9.52427	5.22073e-08	1.20927e-06	8.33376
tetur05g05610	Highly expressed secreted protein family	-2.66884	9.11529	-10.6769	1.05657e-08	3.14414e-07	9.99339
tetur06g03350	Apolipoprotein D	-2.67683	10.4897	-5.23236	8.12123e-05	0.000479679	0.725659
[truncated: 72 more rows]

## Sheet: maize
Table S1 - Differential gene expression analysis of the different T. urticae host plant populations. Differentially expressed genes (absolute log2FC ≥ 0.585 and Benjamini-Hochberg adjusted p-value < 0.05) between adult T. urticae females of the maize (Zea mays) population compared to adult T. urticae females of the parental population on common bean (Phaseolus vulgaris)
[truncated: 1,113 more rows]
